# Supplementary material for: Control of Dynamic sp3-C Stereochemistry
Source: Research Square preprint supplement (doi:10.21203/rs.3.rs-318491/v1), 2021-03-26
Supplement: Supplementary file 1 [file 382a86fc2cc8de9d720df4d2.pdf]

# Control of Dynamic $sp^3$ -C Stereochemistry

Aisha N. Bismillah,<sup>‡</sup> Toby G. Johnson,<sup>‡</sup> Burhan A. Hussein, Andrew T. Turley, Ho Chi Wong, Juan A. Aguilar, Dmitry S. Yufit and Paul R. McGonigal\*

Department of Chemistry, Durham University, Lower Mountjoy, Stockton Road, Durham, DH1 3LE, United Kingdom

<sup>‡</sup>These authors contributed equally to this work.

To whom correspondence should be addressed. Email: paul.mcgonigal@durham.ac.uk

## Table of Contents

|                                                                                                                                            |      |
|--------------------------------------------------------------------------------------------------------------------------------------------|------|
| 1. General Methods                                                                                                                         | S1   |
| 2. Synthetic Procedures                                                                                                                    | S3   |
| 3. $^1\text{H}$ , $^{13}\text{C}$ , $^{19}\text{F}$ and $^{31}\text{P}$ NMR Spectroscopic Characterisation of Synthesised Compounds        | S25  |
| 3.1 Structural Assignment by Two-Dimensional (2D) NMR                                                                                      | S64  |
| 4. High-Performance Liquid Chromatography (HPLC)                                                                                           | S66  |
| 5. Additional NMR Spectroscopic Measurements                                                                                               | S67  |
| 5.1 <i>In Situ</i> Formation of Diazinane <b>8</b>                                                                                         | S67  |
| 5.2 Desymmetrisation of the Barbaralyl Core                                                                                                | S68  |
| 5.3 Variable-Temperature (VT) NMR Spectroscopy of ( <i>R,S</i> )/( <i>S,S</i> )- <b>2</b>                                                  | S69  |
| 5.4 $^{13}\text{C}$ NMR Spectroscopic Comparison of ( <i>R,S</i> )/( <i>S,S</i> )- <b>2</b>                                                | S72  |
| 5.5 Dynamic NMR Spectroscopy of ( <i>A,S,S</i> )/( <i>C,R,S</i> )- $\text{L}_{\text{BB}}\text{PdCl}_2$                                     | S74  |
| 5.6 Dynamic NMR Spectroscopy of ( <i>C,R,S</i> )- $\text{L}_{\text{BB}}\text{RuCp}(\text{NCMe})\cdot\text{PF}_6$                           | S76  |
| 6. Photoluminescence Quantum Yield (PLQY) Measurements of ( <i>C,R,S</i> )- $\text{L}_{\text{BB}}\text{RuCp}(\text{NCMe})\cdot\text{PF}_6$ | S80  |
| 7. X-Ray Crystallographic Analysis                                                                                                         | S82  |
| 7.1. ( <i>R,S</i> )- <b>1</b>                                                                                                              | S82  |
| 7.2. ( <i>S,S</i> )- <b>2</b>                                                                                                              | S83  |
| 7.3. ( <i>R,R</i> )- <b>2</b>                                                                                                              | S84  |
| 7.4. ( <i>R,R</i> )/( <i>S,S</i> )- <b>4</b>                                                                                               | S85  |
| 7.5. <b>7</b>                                                                                                                              | S86  |
| 7.6. <b>S1</b>                                                                                                                             | S87  |
| 7.7. ( <i>R,S</i> )- <b>5</b>                                                                                                              | S88  |
| 7.8. ( <i>A,S,S</i> )/( <i>C,R,S</i> )- $\text{L}_{\text{BB}}\text{PdCl}_2$                                                                | S89  |
| 7.9. ( <i>C,R,S</i> )- $\text{L}_{\text{BB}}\text{RuCp}(\text{NCMe})\cdot\text{PF}_6$                                                      | S91  |
| 8. <i>In Silico</i> Modelling                                                                                                              | S93  |
| 8.1 General Methods                                                                                                                        | S93  |
| 8.2 Optimised Structures                                                                                                                   | S95  |
| 8.3 Conformational Search Results                                                                                                          | S147 |
| 9. References                                                                                                                              | S148 |

## Supporting Information

## 1. General Methods

All reagents were purchased from commercial suppliers (Sigma-Aldrich, Acros Organics, or Alfa Aesar) and used without further purification. Analytical thin-layer chromatography (TLC) was performed on neutral aluminium sheet silica gel plates and visualised under UV irradiation (254 nm). Nuclear magnetic resonance (NMR) spectra were recorded using a Bruker Advance (III)-400 ( $^1\text{H}$  400.130 MHz and  $^{13}\text{C}$  100.613 MHz), Varian Inova-500 ( $^1\text{H}$  500.130 MHz and  $^{13}\text{C}$  125.758 MHz), Varian VNMRS-600 ( $^1\text{H}$  600.130 MHz and  $^{13}\text{C}$  150.903 MHz) or a Varian VNMRS-700 ( $^1\text{H}$  700.130 MHz and  $^{13}\text{C}$  176.048 MHz) spectrometer, at a constant temperature of 298 K unless otherwise stated. For variable-temperature measurements, operating temperatures were calibrated using an internal calibration solution of MeOH and glycerol. Chemical shifts ( $\delta$ ) are reported in parts per million (ppm) relative to the signals corresponding to residual non-deuterated solvents [ $\text{CDCl}_3$ :  $\delta$  = 7.26 or 77.16.  $\text{CD}_3\text{CN}$ :  $\delta$  = 1.94, 1.32 or 118.26]. Coupling constants ( $J$ ) are reported in Hertz (Hz).  $^{13}\text{C}$  NMR experiments were proton-decoupled, whereas  $^{19}\text{F}$  NMR experiments are coupled and generally referenced to an internal standard, hexafluorobenzene (HFB,  $\delta$  = -164.99 ppm).  $^{31}\text{P}$  NMR experiments are decoupled for compounds (*R,S*)/(*S,S*)-**L<sub>BB</sub>**, (*R,S*)/(*S,S*)-**L<sub>BB</sub>**AuCl and (*A,R,S*)/(*C,S,S*)-**L<sub>BB</sub>**PdCl<sub>2</sub>, but coupled for compound (*C,R,S*)/(*S,S*)-**L<sub>BB</sub>**RuCp(NCMe)·PF<sub>6</sub>. Assignments of  $^1\text{H}$  and  $^{13}\text{C}$  NMR signals were accomplished by two-dimensional NMR spectroscopy (COSY, NOESY, HSQC, HMBC). NMR spectra were processed using MestReNova version 10.0. Data are reported as follows: chemical shift; multiplicity; coupling constants; integral and assignment. A Solid-State  $^{13}\text{C}$  NMR spectrum was recorded on Bruker Advance III HD spectrometer at 100.63 MHz with a 3.2 mm (rotor o.d.) magic-angle spinning probe at a spin rate of 10 kHz. The spectrum was recorded using cross-polarisation with total suppression of spinning sidebands with a contact time of 1-ms and a recycle delay of 120-s. The spectrum was recorded at ambient probe temperature (approximately 25 °C) and at a spin rate of 10 kHz. Spectra are reported

relative to an external sample of neat tetramethylsilane (referencing was carried out by setting the high-frequency signal from adamantane to 38.5 ppm). Low-resolution Atmospheric Solids Analysis Probe (ASAP)-MS were performed using a Waters Xevo QTOF equipped with an ASAP. High-resolution electrospray ionisation (HR-ESI) and ASAP (HR-ASAP) mass spectra were measured using a Waters LCT Premier XE high resolution, accurate mass UPLC ES MS (also with ASAP ion source). Melting points were recorded using a Gallenkamp (Sanyo) apparatus and are uncorrected. Chiral HPLC was ran on a PE Series 200 system with diode array detection using a ChiralPak OD column (25 cm  $\times$  4.6 mm – standard column) eluting with hexanes:<sup>i</sup>PrOH (98:2) at 1 mL per minute (212 nm detection). Absorption spectra were measured on a Shimadzu UV-3600 UV-VIS-NIR spectrophotometer and photoluminescence spectra were measured a Jobin Yvon Fluorolog. The X-ray single-crystal diffraction data were collected at a temperature of 120.0(2) K using  $\lambda$ MoK $\alpha$  radiation ( $\lambda$  = 0.71073 Å). Compounds **1**, (*S,R*)-**5** and (*S,R*)-**2** were collected on a Bruker D8Venture (Photon100 CMOS detector, I $\mu$ S-microsource, focusing mirrors) diffractometer. Compounds **S1**, (*A,R,S*)/(*C,S,S*)-**LBBPdCl<sub>2</sub>** and (*C,R,S*)-**LBBRuCp(NCMe)·PF<sub>6</sub>** were collected on a Photon III MM (CPAD detector, I $\mu$ S-III-microsource, focusing mirrors) diffractometer. Compounds (*R,S*)-**2**, (*R,R*)/(*S,S*)-**4** and **7** were collected on an Agilent XCalibur (Sapphire-3 CCD detector, fine-focus sealed tube, graphite monochromator) diffractometer. All diffractometers were equipped with Cryostream (Oxford Cryosystems) open-flow nitrogen cryostats. All structures were solved by direct method and refined by full-matrix least squares on F<sup>2</sup> for all data using Olex2<sup>1</sup> and SHELXT<sup>2</sup> software. All non-hydrogen atoms were refined anisotropically, hydrogen atoms in structures (*S,R*)-**2**, (*R,S*)-**2**, **S1** and **7** were freely refined in isotropic approximation, the hydrogen atoms in remaining structures were placed at the calculated positions and refined in riding mode. Crystallographic data for these structures have been deposited within the Cambridge Crystallographic Data Centre as supplementary publication CCDC-2068012–2068020.

## 2. Synthetic Procedures

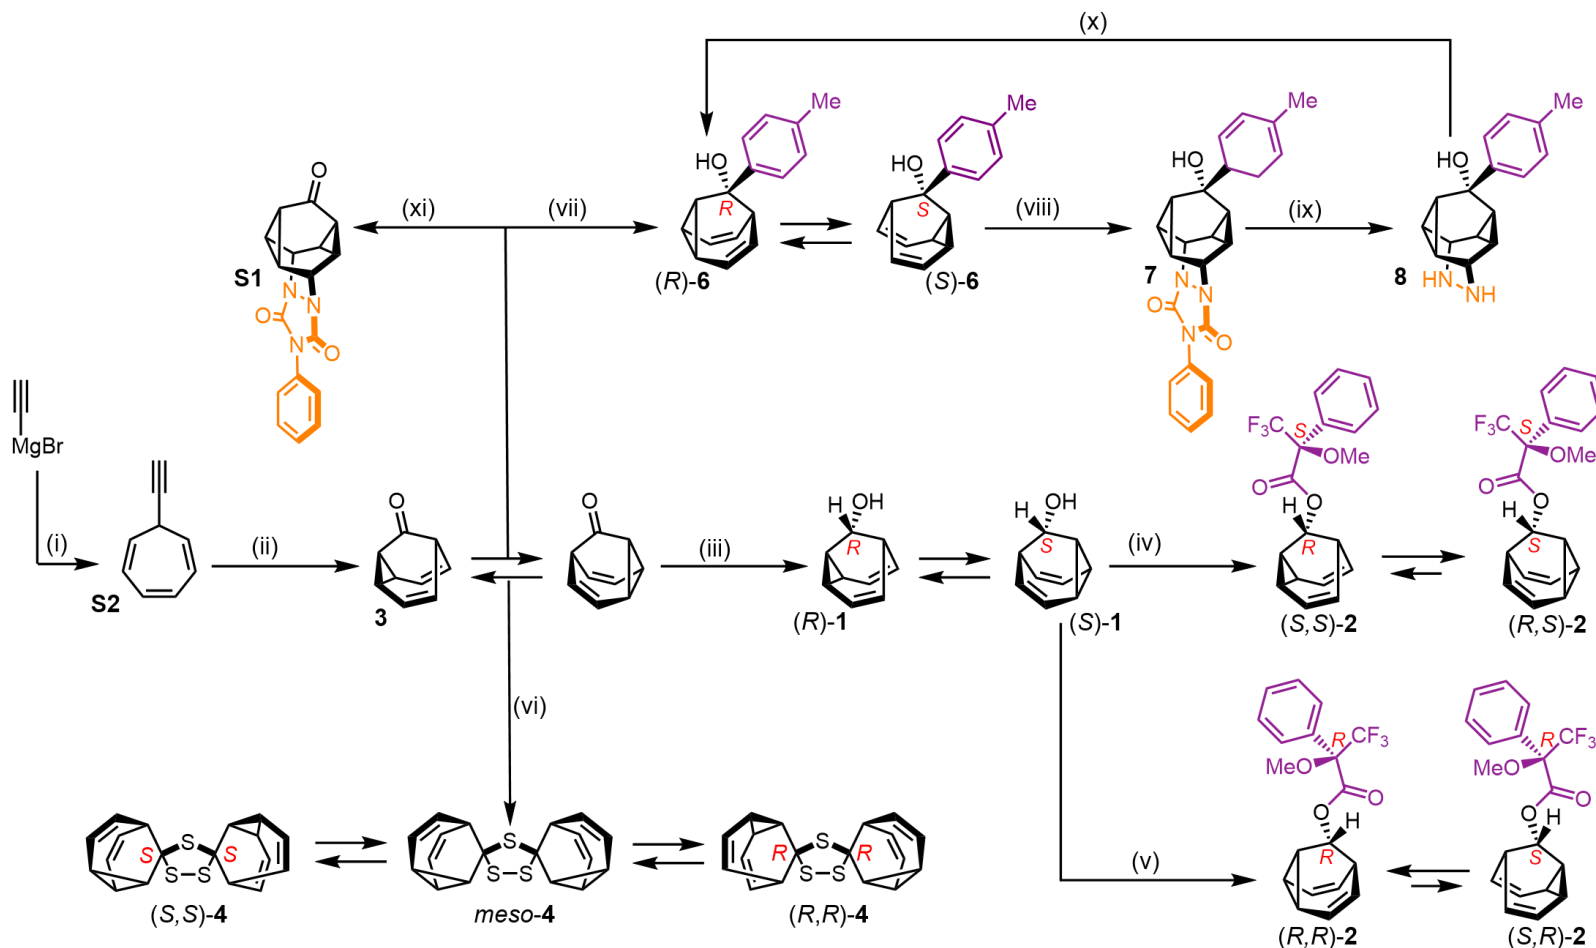

**Scheme S1.** Synthesis of **S2**, **3**, (*R*)/(*S*)-**1**, (*R,S*)/(*S,S*)-**2**, (*R,R*)/(*S,R*)-**2**, (*R,R*)/*meso*/(*S,S*)-**4**, (*R*)/(*S*)-**6**, **7**, **8** and **S1** according to modified literature procedures.<sup>3,4</sup> Reagents and conditions: (i) 1. LiCl / THF /  $-78^{\circ}\text{C}$  / 40 min. 2. Tropylium tetrafluoroborate /  $-78^{\circ}\text{C}$  to rt, (ii) IPrAu(MeCN)BF<sub>4</sub> (5 mol%) / Ph<sub>2</sub>SO / CH<sub>2</sub>Cl<sub>2</sub> / rt / 16 h, (iii) LiAlH<sub>4</sub> / Et<sub>2</sub>O /  $0^{\circ}\text{C}$  / 3 h, (iv) 1. (COCl)<sub>2</sub> / (*S*)-(+)-Mosher's acid / hexanes / DMF / 90 min / rt. 2. DMAP / CHCl<sub>3</sub> / Et<sub>3</sub>N / rt / 5 d, (v) 1. (COCl)<sub>2</sub> / (*R*)-(+)-Mosher's acid / hexanes / DMF / 90 min / rt. 2. DMAP / CHCl<sub>3</sub> / Et<sub>3</sub>N / rt / 5 d, (vi) Lawesson's Reagent / PhMe /  $110^{\circ}\text{C}$  / 18 h, (vii) 1. Mg turnings / THF / 1-bromo-4-fluorobenzene / reflux to rt. 2.  $0^{\circ}\text{C}$  to rt, (viii) PTAD / CH<sub>2</sub>Cl<sub>2</sub> /  $50^{\circ}\text{C}$  / 24 h, (ix) NaOH / *i*-PrOH /  $85^{\circ}\text{C}$  / 24 h, (x) HCl<sub>(aq)</sub> / CuCl<sub>2</sub> in H<sub>2</sub>O /  $0^{\circ}\text{C}$  / 4 h and (xi) PTAD / CH<sub>2</sub>Cl<sub>2</sub> /  $50^{\circ}\text{C}$  / 72 h. IPr = 1,3-bis(2,6-diisopropylphenyl)imidazol-2-ylidene. Lawesson's reagent = 2,4-bis(4-methoxyphenyl)-2,4-dithioxo-1,3,2,4-dithiadiphosphetane. PTAD = 4-phenyl-1,2,4-triazoline-3,5-dione



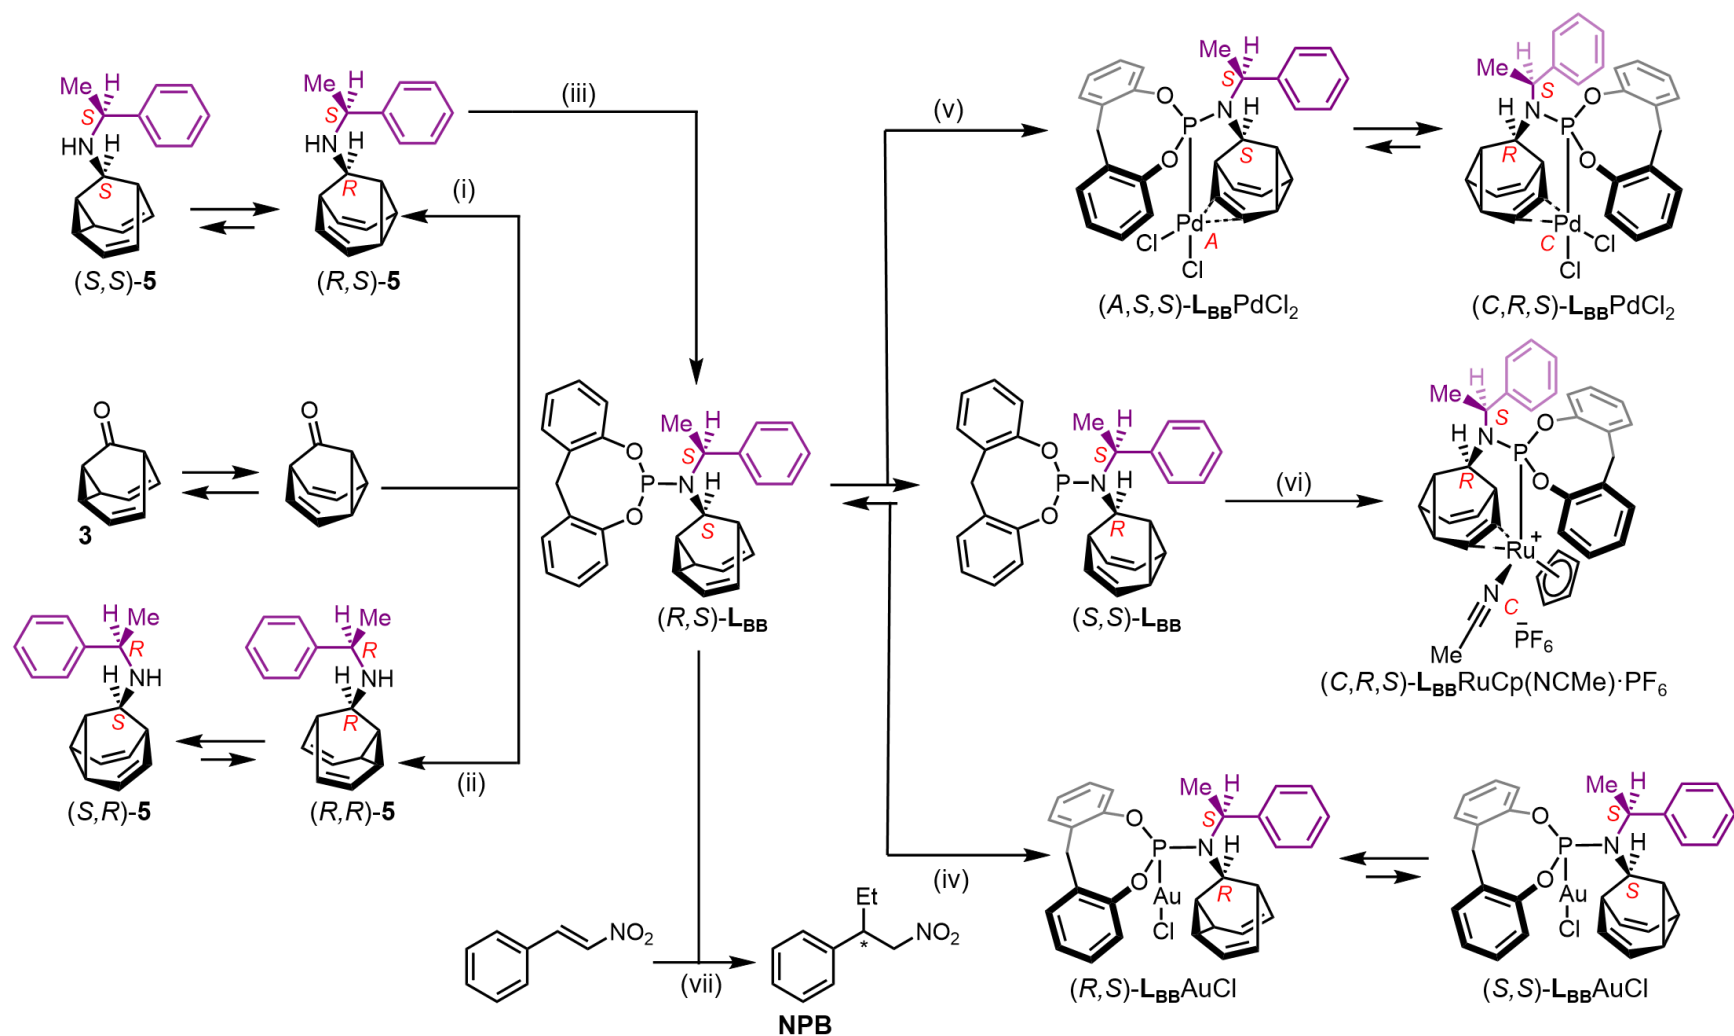

**Scheme S2.** Synthesis of (S,S)/(R,S)-5, (S,R)/(R,R)-5, (R,S)/(S,S)-L<sub>BB</sub>, (R,S)/(S,S)-L<sub>BB</sub>AuCl, (A,R,S)/(C,S,S)-L<sub>BB</sub>PdCl<sub>2</sub>, (C,R,S)/(S,S)-L<sub>BB</sub>RuCp(NCMe)·PF<sub>6</sub> and **NPB** according to a modified literature procedure.<sup>5</sup> Reagents and conditions: (i) 1. (S)-(+)-1-phenylethylamine / CH<sub>3</sub>COOH / MeOH / 30 min / rt. 2. NaBH<sub>3</sub>CN / 16 h / 100 °C, (ii) 1. (R)-(-)-1-phenylethylamine / CH<sub>3</sub>COOH / MeOH / 30 min / rt. 2. NaBH<sub>3</sub>CN / 13 d / rt, (iii) 1. PCl<sub>3</sub> / Et<sub>3</sub>N / CH<sub>2</sub>Cl<sub>2</sub> / 0 °C / 3 h 2. 2,2'-methylenediphenol / rt / 16 h, (iv) Me<sub>2</sub>S-AuCl / CDCl<sub>3</sub> / rt / 10 min, (v) PdCl<sub>2</sub>·MeCN / CDCl<sub>3</sub> / rt / 15 min, (vi) CpRu(NCMe)<sub>3</sub>·PF<sub>6</sub> / CDCl<sub>3</sub> / rt / 5 min and (vii) 1. Cu(OTf)<sub>2</sub> (2 mol%) / PhMe / rt / 30 min. 2. *trans*-β-nitrostyrene / -78 °C / then Et<sub>2</sub>Zn / hexanes / 12 h.

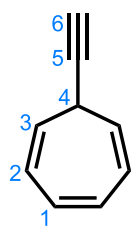

**7-Ethynylcyclohepta-1,3,5-triene [S2]:** Anhydrous LiCl (0.524 g, 12.40 mmol) was placed in an oven-dried round-bottomed flask fitted with a septum under an N<sub>2</sub> atmosphere. Anhydrous THF was added (38 mL) and the resulting solution was cooled to –78 °C before adding a solution of ethynyl magnesium bromide (22.5 mL, 12.2 mmol, 0.5 M in THF) and stirring for 10 min at this temperature. Tropylium tetrafluoroborate (1.00 g, 5.62 mmol) was added to the reaction mixture and the reaction mixture was stirred for 16 h, where the temperature was raised to rt, following removal of the ice bath. The reaction was quenched with a saturated aqueous solution of NH<sub>4</sub>Cl (20 mL), then extracted with Et<sub>2</sub>O (3 × 30 mL). The combined organic extracts were then dried over MgSO<sub>4</sub>, filtered and the solvent removed under reduced pressure (rotary evaporator bath at 16 °C, ≥ 100 mbar). The crude residue was purified by column chromatography (Teledyne Isco CombiFlash Rf+ system, 24 g SiO<sub>2</sub>, *n*-pentane) to give the title compound as a colourless oil (539 mg, 4.6 mmol, 83%). **<sup>1</sup>H NMR** (600 MHz, CDCl<sub>3</sub>) δ 6.66 (dd, *J* = 3.7, 2.7 Hz, 2H, H<sub>1</sub>), 6.27 – 6.07 (m, 2H, H<sub>2</sub>), 5.44 – 5.20 (m, 2H, H<sub>3</sub>), 2.64 – 2.42 (m, 1H, H<sub>4</sub>), 2.17 (d, *J* = 2.6 Hz, 1H, H<sub>6</sub>). **<sup>13</sup>C NMR** (151 MHz, CDCl<sub>3</sub>) δ 131.2 (C<sub>1</sub>), 125.1 (C<sub>2</sub>), 123.0 (C<sub>3</sub>), 85.8 (C<sub>5</sub>), 68.5 (C<sub>6</sub>), 31.5 (C<sub>4</sub>). **HRMS-ASAP** *m/z* = 117.0701 [M+H]<sup>+</sup> (calculated for C<sub>9</sub>H<sub>9</sub> = 117.0704). Spectroscopic data were consistent with those published previously.<sup>3</sup>

**Note on labelling and assignment of NMR peaks:** In room temperature solutions, each of the barbaralanes exist as mixtures of two rapidly interconverting valence (stereo)isomers (or automers in the case of **3**). For derivatives with nondegenerate isomers, the NMR spectroscopic assignments below are labelled according to numbering of the major species. However, the species are in fast exchange on account of rapid strain-assisted Cope rearrangement. The chemical shifts of each nucleus are representative of the time-averaged chemical environment they experience as part of the

two isomers (or more in the case of  $\text{LBBRuCp}(\text{NCMe})\cdot\text{PF}_6$ ).  $^1\text{H}$  and  $^{13}\text{C}$  NMR peaks have been assigned to nuclei unambiguously with the aid of two-dimensional (2D) NMR spectra where possible.

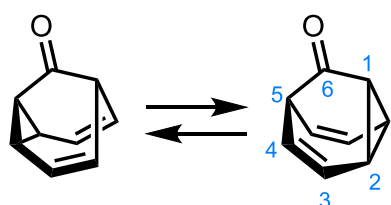

**Tricyclo[3.3.1.0<sup>2,8</sup>]nona-3,6-dien-9-one [3]:** 7-Ethynylcyclohepta-

1,3,5-triene [S2] (1.0 g, 8.68 mmol) and diphenyl sulphoxide (3.51 g, 17.0 mmol) were charged in a flask and dissolved in anhydrous  $\text{CH}_2\text{Cl}_2$  (15 mL) at 25 °C, with no particular precautions taken to exclude air. (Acetonitrile)[1,3-bis(2,6-diisopropylphenyl)-imidazol-2-ylidene]gold(I) tetrafluoroborate (309 mg, 0.43 mmol, 5 mol%) was added in one portion at the same temperature and the reaction mixture was stirred for 16 h. The reaction was quenched with 10 drops of  $\text{Et}_3\text{N}$  and the solvent was removed under reduced pressure. The crude residue was purified by column chromatography (Teledyne Isco CombiFlash Rf+ system, 24 g  $\text{SiO}_2$ , hexanes– $\text{EtOAc}$ , gradient elution) to give the title compound as a light yellow solid (685 mg, 5.18 mmol, 60%). **M. P.** 55 – 57 °C (lit.<sup>3</sup> 50 – 51 °C).  **$^1\text{H}$  NMR** (700 MHz,  $\text{CDCl}_3$ )  $\delta$  5.97 – 5.51 (m, 2H,  $\text{H}_1$  and  $\text{H}_5$ ), 4.32 (br s, 4H,  $\text{H}_2$  and  $\text{H}_4$ ), 2.90 – 2.55 (m, 2H,  $\text{H}_3$ ).  **$^{13}\text{C}$  NMR** (176 MHz,  $\text{CDCl}_3$ )  $\delta$  211.0 ( $\text{C}_6$ ), 121.7 ( $\text{C}_2$  and  $\text{C}_4$ , or  $\text{C}_3$ ), 121.5 ( $\text{C}_2$  and  $\text{C}_4$ , or  $\text{C}_3$ ), 38.3 ( $\text{C}_1$  and  $\text{C}_5$ ). **HRMS-ASAP**  $m/z$  = 133.0648 [ $\text{M}-\text{H}$ ]<sup>+</sup> (calculated for  $\text{C}_9\text{H}_9\text{O}$  = 133.0653).

Spectroscopic data were consistent with those published previously.<sup>3</sup>

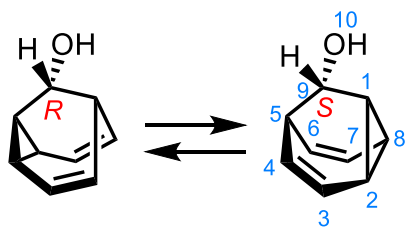

**Tricyclo[3.3.1.0<sup>2,8</sup>]nona-3,6-dien-9-ol [(R)/(S)-1]:**  $\text{LiAlH}_4$

(120 mg, 3.16 mmol) was placed in an oven-dried round-bottomed flask fitted with a septum under a  $\text{N}_2$  atmosphere and suspended in anhydrous  $\text{Et}_2\text{O}$  (5 mL). The mixture was cooled to 0 °C and then a solution of

tricyclo[3.3.1.0<sup>2,8</sup>]nona-3,6-dien-9-one **[3]** (200 mg, 1.51 mmol) in anhydrous Et<sub>2</sub>O (5 mL) was added dropwise. The reaction mixture was stirred at this temperature for 3 h. The reaction was quenched with a saturated aqueous solution of potassium sodium tartrate (25 mL) and allowed to warm to rt before being extracted with Et<sub>2</sub>O (3 × 30 mL). The combined organic extracts were dried over MgSO<sub>4</sub> and the solvent was removed under reduced pressure (rotary evaporator bath at 16 °C, ≥ 100 mbar). The crude residue was purified by column chromatography (Teledyne Isco CombiFlash Rf+ system, 24 g SiO<sub>2</sub>, *n*-pentane–Et<sub>2</sub>O, gradient elution) to give the title compound as a white solid (159 mg, 1.18 mmol, 78%). **M. P.** 82 – 84 °C (lit.<sup>3</sup> 86 – 88 °C). **<sup>1</sup>H NMR** (400 MHz, CDCl<sub>3</sub>) δ 5.88 (t, *J* = 7.9 Hz, 1H, H<sub>3</sub>), 5.54 (t, *J* = 7.6 Hz, 1H, H<sub>7</sub>), 4.16 – 4.04 (m, 2H, H<sub>6</sub> and H<sub>8</sub>), 4.02 – 3.92 (m, 2H, H<sub>2</sub> and H<sub>4</sub>), 3.61 (d, *J* = 3.3 Hz, 1H, H<sub>9</sub>), 2.59 – 2.47 (m, 2H, H<sub>1</sub> and H<sub>5</sub>), 1.14 (s, 1H, H<sub>10</sub>). **<sup>13</sup>C NMR** (151 MHz, CDCl<sub>3</sub>) δ 123.3 (C<sub>3</sub>), 120.9 (C<sub>7</sub>), 76.4 (C<sub>6</sub> and C<sub>8</sub>), 72.4 (C<sub>2</sub> and C<sub>4</sub>), 62.5 (C<sub>9</sub>), 31.8 (C<sub>1</sub> and C<sub>5</sub>). **HRMS-ASAP** *m/z* = 117.0699 [M-OH]<sup>+</sup>, calculated for C<sub>9</sub>H<sub>9</sub>: 117.0704.

Spectroscopic data were consistent with those published previously.<sup>3</sup>

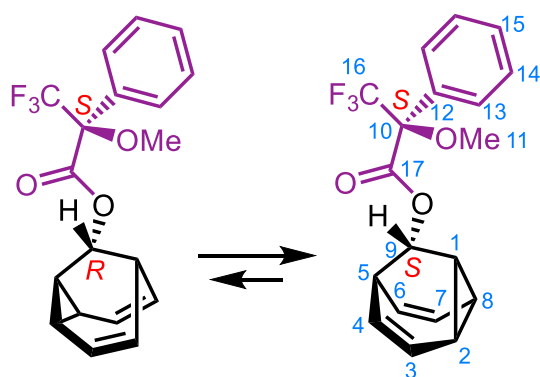

**Tricyclo[3.3.1.0<sup>2,8</sup>]nona-3,6-dien-9-yl (S)-3,3,3-trifluoro-2-methoxy-2-phenylpropanoate [(*R,S*)/(*S,S*)-**

**2]**: In an oven-dried round-bottomed flask fitted with a septum under a N<sub>2</sub> atmosphere, oxalyl chloride (50 μL, 0.58 mmol) was added to a stirred solution of (*S*)-(-)-

Mosher's acid (28 mg, 0.12 mmol) in anhydrous hexanes (5 mL) and anhydrous DMF (10 μL, 0.13 mmol). The reaction mixture was left to stir for 90 min at rt before being cooled to -20 °C in a freezer for 60 h. The reaction mixture was filtered and the filtrate was concentrated under reduced pressure. This residue, tricyclo[3.3.1.0<sup>2,8</sup>]nona-3,6-dien-9-ol [(*R*)/(*S*)-**1**] (18 mg, 0.13 mmol) and

DMAP (13 mg, 0.11 mmol) were dissolved in anhydrous  $\text{CHCl}_3$  (1.5 mL) before  $\text{Et}_3\text{N}$  (55  $\mu\text{L}$ , 0.39 mmol) was added dropwise to the stirred reaction mixture at rt under an  $\text{N}_2$  atmosphere. The reaction was left to stir for 5 d, after which it was quenched with a saturated aqueous solution of  $\text{NH}_4\text{Cl}$  (25 mL) and extracted with  $\text{CHCl}_3$  ( $3 \times 25$  mL). The combined organic extracts were washed with  $\text{H}_2\text{O}$  ( $1 \times 50$  mL), dried over  $\text{MgSO}_4$ , filtered and the solvent was removed under reduced pressure. The crude residue was purified by chromatography using a short column of  $\text{SiO}_2$  in a pasteur pipette and eluting with hexanes, to give the title compound as a white solid (25 mg, 0.07 mmol, 58%). **M. P.** 79 – 81°C.  **$^1\text{H}$  NMR** (600 MHz,  $\text{CDCl}_3$ )  $\delta$  7.56 – 7.50 (m, 2H,  $\text{H}_{14}$ ), 7.42 – 7.35 (m, 3H,  $\text{H}_{13}$  and  $\text{H}_{15}$ ), 5.77 (t,  $J = 7.9$  Hz, 1H,  $\text{H}_7$ ), 5.58 (t,  $J = 7.6$  Hz, 1H,  $\text{H}_3$ ), 4.93 (t,  $J = 3.1$  Hz, 1H,  $\text{H}_9$ ), 4.19 – 4.12 (m, 1H,  $\text{H}_2$  or  $\text{H}_4$ ), 4.10 – 4.04 (m, 1H,  $\text{H}_2$  or  $\text{H}_4$ ), 4.04 – 3.99 (m, 1H,  $\text{H}_6$  or  $\text{H}_8$ ), 3.97 – 3.93 (m, 1H,  $\text{H}_8$  or  $\text{H}_6$ ), 3.53 (s, 3H,  $\text{H}_{17}$ ), 2.77 – 2.71 (m, 1H,  $\text{H}_5$  or  $\text{H}_1$ ), 2.67 – 2.61 (m, 1H,  $\text{H}_1$  or  $\text{H}_5$ ).  **$^{13}\text{C}$  NMR** (151 MHz,  $\text{CDCl}_3$ )  $\delta$  166.4 ( $\text{C}_{10}$ ), 132.4 ( $\text{C}_{12}$ ), 129.6 ( $\text{C}_{15}$ ), 128.4 ( $\text{C}_{13}$ ), 127.6 ( $\text{C}_{14}$ ), 123.4 (q,  $J_{\text{CF}} = 288$  Hz,  $\text{C}_{16}$ ), 121.8 ( $\text{C}_7$ ), 121.3 ( $\text{C}_3$ ), 84.6 (q,  $J_{\text{CF}} = 27$  Hz,  $\text{C}_{11}$ ), 76.3 ( $\text{C}_2$  or  $\text{C}_4$ ), 74.4 ( $\text{C}_6$  or  $\text{C}_8$ ), 73.4 ( $\text{C}_2$  or  $\text{C}_4$ ), 70.9 ( $\text{C}_6$  or  $\text{C}_8$ ), 69.8 ( $\text{C}_9$ ), 55.6 ( $\text{C}_{17}$ ), 28.3 ( $\text{C}_1$  or  $\text{C}_5$ ), 27.8 ( $\text{C}_5$  or  $\text{C}_1$ ).  **$^{19}\text{F}$  NMR** (376 MHz,  $\text{CDCl}_3$ )  $\delta$  -75.2 (s,  $\text{F}_{16}$ ). **HRMS-ASAP**  $m/z = 351.1213$   $[\text{M}+\text{H}]^+$ , calculated for  $\text{C}_{19}\text{H}_{18}\text{O}_3\text{F}_3$ : 351.1208.

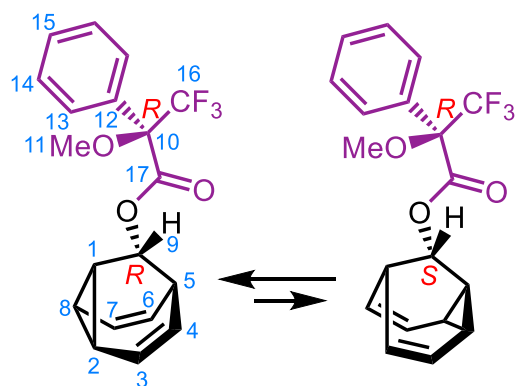

**Tricyclo[3.3.1.0<sup>2,8</sup>]nona-3,6-dien-9-yl (*R*)-3,3,3-trifluoro-2-methoxy-2-phenylpropanoate [(*R,R*)/(*S,R*)-2]:**

In an oven-dried round-bottomed flask fitted with a septum under a  $\text{N}_2$  atmosphere, oxalyl chloride (100  $\mu\text{L}$ , 1.18 mmol) was added to a stirred solution of (*R*)-(+)-

Mosher's acid (56 mg, 0.24 mmol) in anhydrous hexanes (8 mL) and anhydrous DMF (4.8  $\mu\text{L}$ , 0.06

mmol). The reaction mixture was left to stir for 7 h at rt before being cooled to  $-20\text{ }^{\circ}\text{C}$  in a freezer for 16 h. The reaction mixture was filtered and the filtrate was concentrated under reduced pressure. This residue, tricyclo[3.3.1.0<sup>2,8</sup>]nona-3,6-dien-9-ol [(*R*)/(*S*)-1] (40 mg, 0.30 mmol) and DMAP (26 mg, 0.21 mmol) were dissolved in anhydrous  $\text{CHCl}_3$  (3 mL) before  $\text{Et}_3\text{N}$  (120  $\mu\text{L}$ , 0.86 mmol) was added dropwise to the stirred reaction mixture at rt under an  $\text{N}_2$  atmosphere. The reaction was left to stir for 3 d, after which it was quenched with a saturated aqueous solution of  $\text{NH}_4\text{Cl}$  (50 mL) and extracted with  $\text{CHCl}_3$  ( $3 \times 50\text{ mL}$ ). The combined organic extracts were washed with  $\text{H}_2\text{O}$  ( $1 \times 100\text{ mL}$ ), dried over  $\text{MgSO}_4$ , filtered and the solvent was removed under reduced pressure. The crude residue was purified by chromatography using a short column of  $\text{SiO}_2$  in a pasteur pipette and eluting with hexanes, to give the title compound as a white solid (66 mg, 0.19 mmol, 79%). **M. P.**  $79 - 81^{\circ}\text{C}$ .  **$^1\text{H}$  NMR** (700 MHz,  $\text{CDCl}_3$ )  $\delta$  7.60 – 7.50 (m, 2H,  $\text{H}_{14}$ ), 7.43 – 7.35 (m, 3H,  $\text{H}_{13}$  and  $\text{H}_{15}$ ), 5.77 (t,  $J = 7.9\text{ Hz}$ , 1H,  $\text{H}_7$ ), 5.58 (t,  $J = 7.6\text{ Hz}$ , 1H,  $\text{H}_3$ ), 4.94 (t,  $J = 3.2\text{ Hz}$ , 1H,  $\text{H}_9$ ), 4.17 – 4.14 (m, 1H,  $\text{H}_2$  or  $\text{H}_4$ ), 4.08 – 4.04 (m, 1H,  $\text{H}_4$  or  $\text{H}_2$ ), 4.03 – 4.00 (m, 1H,  $\text{H}_6$  or  $\text{H}_8$ ), 3.97 – 3.94 (m, 1H,  $\text{H}_8$  or  $\text{H}_6$ ), 3.53 (s, 3H,  $\text{H}_{17}$ ), 2.76 – 2.73 (m, 1H,  $\text{H}_5$  or  $\text{H}_1$ ), 2.65 – 2.62 (m, 1H,  $\text{H}_5$  or  $\text{H}_1$ ).  **$^{13}\text{C}$  NMR** (176 MHz,  $\text{CDCl}_3$ )  $\delta$  166.4 ( $\text{C}_{10}$ ), 132.4 ( $\text{C}_{12}$ ), 129.6 ( $\text{C}_{15}$ ), 128.4 ( $\text{C}_{13}$ ), 127.6 ( $\text{C}_{14}$ ), 123.4 (q,  $J_{\text{CF}} = 288\text{ Hz}$ ,  $\text{C}_{16}$ ), 121.8 ( $\text{C}_7$ ), 121.3 ( $\text{C}_3$ ), 84.6 (q,  $J_{\text{CF}} = 27\text{ Hz}$ ,  $\text{C}_{11}$ ), 76.2 ( $\text{C}_2$  or  $\text{C}_4$ ), 74.4 ( $\text{C}_8$  or  $\text{C}_6$ ), 73. (C<sub>2</sub> or  $\text{C}_4$ ), 70.9 ( $\text{C}_8$  or  $\text{C}_6$ ), 69.7 ( $\text{C}_9$ ), 55.3 ( $\text{C}_{17}$ ), 28.3 ( $\text{C}_1$  or  $\text{C}_5$ ), 27.8 ( $\text{C}_5$  or  $\text{C}_1$ ).  **$^{19}\text{F}$  NMR** (376 MHz,  $\text{CDCl}_3$ )  $\delta$   $-75.2$  (s,  $\text{F}_{16}$ ). **HRMS-ASAP**  $m/z = 351.1203$  [ $\text{M} + \text{H}$ ] $^{+}$ , calculated for  $\text{C}_{19}\text{H}_{18}\text{O}_3\text{F}_3$ : 351.1208.

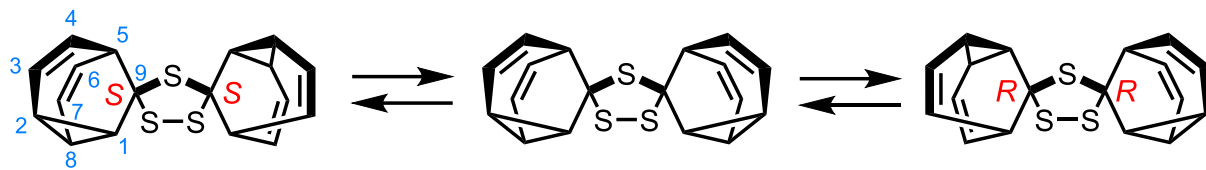

**Dispiro(1,2,4-trithiolane-3,2':5,2''-dibarbaralane)** [(*R,R*)/*meso*/(*S,S*)-4]: Tricyclo[3.3.1.0<sup>2,8</sup>]

nona-3,6-dien-9-one [3] (50 mg, 0.38 mmol) was dissolved in anhydrous PhMe (2 mL, 0.2 M) and 2,4-bis(4-methoxyphenyl)-2,4-dithioxo-1,3,2,4-dithiadiphosphetane (Lawesson's reagent, 100 mg, 0.25 mmol) was added to the stirred reaction mixture under an N<sub>2</sub> atmosphere. The reaction mixture was then heated to 110 °C and left to stir for 18 h. After cooling to rt, the solvent was removed under reduced pressure. The crude residue was purified by preparative TLC, eluting with hexanes–EtOAc (4:1) to give the title compound as a colourless solid (15 mg, 0.05 mmol, 13% yield). The material was further purified by recrystallisation, preparing a saturated MeCN solution at 80 °C and slowly cooling to rt over 2 d. **M. P.** 208 – 210 °C. **<sup>1</sup>H NMR** (600 MHz, CDCl<sub>3</sub>) δ 5.72 (t, *J* = 7.7 Hz, 4H, H<sub>3</sub> or H<sub>4</sub>), 5.70 (t, *J* = 7.7 Hz, 4H, H<sub>3</sub> or H<sub>4</sub>), 4.37 – 4.24 (m, 4H, H<sub>2</sub> or H<sub>5</sub>), 4.24 – 4.17 (m, 4H, H<sub>2</sub> or H<sub>5</sub>), 3.33 – 2.79 (m, 4H, H<sub>1</sub>). **<sup>13</sup>C NMR** (151 MHz, CDCl<sub>3</sub>) δ 122.4 (C<sub>3</sub> or C<sub>4</sub>), 121.1 (C<sub>3</sub> or C<sub>4</sub>), 77.4 (C<sub>2</sub> or C<sub>5</sub>), 77.3 (C<sub>2</sub> or C<sub>5</sub>), 37.0 (C<sub>1</sub>) [C<sub>9</sub> not observed due to slow relaxation of quaternary environment]. **HRMS-ASAP** *m/z* = 329.0495 [M+H]<sup>+</sup>, calculated for C<sub>18</sub>H<sub>17</sub>S<sub>3</sub>: 329.0492.

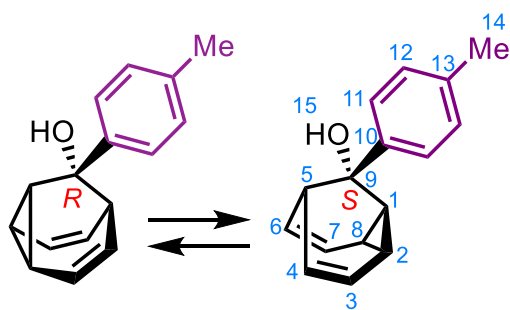

**6-(4-Tolyl)bicyclo[3.2.2]nona-3,8-dien-6-ol** [(*R*)/(*S*)-6]:

Magnesium turnings (100 mg, 4.54 mmol) and I<sub>2</sub> (57 mg, 0.23 mmol, 5 mol%) were placed in an oven-dried two-necked round-bottomed flask with a condenser and a septum under an N<sub>2</sub> atmosphere. The flask was gently

heated with a heat gun until the I<sub>2</sub> started to sublime. The flask was cooled down to rt. A quarter of a solution of 4-bromotoluene (760 mg, 4.5 mmol) in anhydrous THF (10 mL) was added to the

reaction mixture, which was heated until it reached reflux. Upon gentle reflux, the remaining solution of 4-bromotoluene in anhydrous THF was added dropwise over 30 min. The reaction mixture was heated at reflux for 30 min before cooling to rt. Tricyclo[3.3.1.0<sup>2,8</sup>]nona-3,6-dien-9-one [**3**] (111 mg, 0.84 mmol) was transferred to an oven-dried round-bottomed flask, and the flask was purged with N<sub>2</sub>. Anhydrous THF (10 mL) was added and the solution was cooled to 0 °C. The Grignard solution (prepared above) was added dropwise over 30 min to the tricyclo[3.3.1.0<sup>2,8</sup>]nona-3,6-dien-9-one solution. The reaction mixture was stirred for 16 h, and the temperature was raised from 0 °C to rt, following removal of the ice bath. The reaction was quenched with a saturated aqueous solution of NH<sub>4</sub>Cl (10 mL), then extracted with EtOAc (3 × 20 mL). The combined organic extracts were dried over MgSO<sub>4</sub>, filtered and the solvent removed under reduced pressure. The crude residue was purified by column chromatography (Teledyne Isco CombiFlash Rf+ system, 24 g SiO<sub>2</sub>, hexanes–CH<sub>2</sub>Cl<sub>2</sub>, gradient elution including 0.5% Et<sub>3</sub>N in the elution) to yield the title compound as a cream-coloured solid (136 mg, 0.61 mmol, 80%). **M. P.** 59 – 61°C. **<sup>1</sup>H NMR** (700 MHz, CDCl<sub>3</sub>) δ 7.33 (d, *J* = 8.2 Hz, 2H, H<sub>11</sub>), 7.12 (d, *J* = 7.9 Hz, 2H, H<sub>12</sub>), 5.91 (t, *J* = 7.7 Hz, 1H, H<sub>7</sub>), 5.58 (t, *J* = 7.6 Hz, 1H, H<sub>3</sub>), 4.28 – 4.24 (m, 2H, H<sub>8</sub> and H<sub>6</sub>), 4.24 – 4.21 (m, 2H, H<sub>4</sub> and H<sub>2</sub>), 2.83 – 2.57 (m, 2H, H<sub>5</sub> and H<sub>1</sub>), 2.33 (d, *J* = 0.7 Hz, 3H, H<sub>14</sub>), 1.98 (s, 1H, H<sub>15</sub>). **<sup>13</sup>C NMR** (176 MHz, CDCl<sub>3</sub>) δ 140.4 (C<sub>10</sub>), 136.8 (C<sub>13</sub>), 128.6 (C<sub>12</sub>), 126.4 (C<sub>11</sub>), 123.2 (C<sub>7</sub>), 120.9 (C<sub>3</sub>), 77.9 (C<sub>4</sub> and C<sub>2</sub>), 75.5 (C<sub>8</sub> and C<sub>6</sub>), 68.6 (C<sub>9</sub>), 38.2 (C<sub>5</sub> and C<sub>1</sub>), 21.2 (C<sub>14</sub>). **HRMS-ASAP** *m/z* = 207.1154 [M-OH]<sup>+</sup>, calculated for C<sub>16</sub>H<sub>15</sub>: 207.1174.



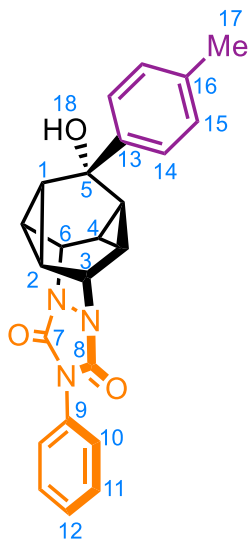

**11-Hydroxy-11-(4-tolylphenyl)-5-phenyl-3,5,7-triazatetracyclo[8.2.2.0-<sup>2,8</sup>.0<sup>3,7</sup>]tetradecane-4,6-dione [7]:** 6-(4-Tolyl)bicyclo[3.2.2]nona-3,8-dien-6-ol [(*R*)/(*S*)-6] (15 mg, 0.07 mmol) and 4-phenyl-1,2,4-triazoline-3,5-dione (PTAD) (23 mg, 0.13 mmol) were dissolved in anhydrous CH<sub>2</sub>Cl<sub>2</sub> (1.0 mL). The reaction mixture was heated to 50 °C and stirred for 24 h. The reaction mixture was cooled and diluted with CH<sub>2</sub>Cl<sub>2</sub> (20 mL), then washed with saturated aqueous NaHCO<sub>3</sub> (3 × 30 mL). The organic phase was separated and dried over MgSO<sub>4</sub>, filtered and the solvent removed under reduced pressure.

The crude residue was purified by column chromatography (Teledyne Isco CombiFlash Rf+ system, 12 g SiO<sub>2</sub>, CH<sub>2</sub>Cl<sub>2</sub>–EtOAc, gradient elution) to yield the title compound as a colourless solid (22 mg, 0.055 mmol, 85%). **M. P.** 186 – 188 °C (decomp.). **<sup>1</sup>H NMR** (400 MHz, CDCl<sub>3</sub>) δ 7.61 – 7.46 (m, 6H, H<sub>10</sub>, H<sub>11</sub> and H<sub>14</sub>), 7.39 (t, *J* = 7.3 Hz, 1H, H<sub>12</sub>), 7.30 – 7.23 (m, 2H, H<sub>15</sub>), 5.24 (t, *J* = 5.4 Hz, 1H, H<sub>6</sub>), 5.11 (t, *J* = 5.4 Hz, 1H, H<sub>3</sub>), 2.41 (s, 3H, H<sub>17</sub>), 2.14 (br s, 1H, H<sub>18</sub>), 2.02 – 1.87 (m, 2H, H<sub>2</sub>), 1.87 – 1.77 (m, 2H, H<sub>4</sub>), 1.64 (t, *J* = 7.7 Hz, 2H, H<sub>1</sub>). **<sup>13</sup>C NMR** (151 MHz, CD<sub>3</sub>CN) δ 156.5 (C<sub>7</sub> or C<sub>8</sub>), 156.4 (C<sub>7</sub> or C<sub>8</sub>), 145.0 (C<sub>13</sub>), 137.7 (C<sub>16</sub>), 133.1 (C<sub>9</sub>), 129.9 (C<sub>15</sub>), 129.8 (C<sub>10</sub> or C<sub>11</sub>), 129.2 (C<sub>12</sub>), 127.2 (C<sub>10</sub> or C<sub>11</sub>), 126.2 (C<sub>14</sub>), 65.4 (C<sub>5</sub>), 50.4 (C<sub>3</sub>), 49.9 (C<sub>6</sub>), 27.4 (C<sub>1</sub>), 21.0 (C<sub>17</sub>), 18.8 (C<sub>2</sub>), 16.0 (C<sub>4</sub>). **HR-ESI MS** *m/z* = 400.1684 [M+H]<sup>+</sup>, calculated for C<sub>24</sub>H<sub>22</sub>N<sub>3</sub>O<sub>3</sub><sup>+</sup>: 400.1661.

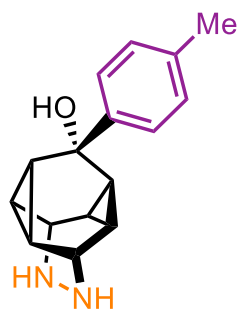

**6-(4-Tolyl)bicyclo[3.2.2]nona-3,8-dien-6-ol [(R)/(S)-6]** from **7**:

A solution of 11-hydroxy-11-(4-tolylphenyl)-5-phenyl-3,5,7-triazatetracyclo[8.2.2.0<sup>2,8</sup>.0<sup>3,7</sup>]tetradecane-4,6-dione [**7**] (45 mg, 0.11 mmol) and NaOH (75 mg, 1.88 mmol) in *i*PrOH (6 mL) were heated to reflux for 24 h under N<sub>2</sub>. Evidence of an intermediate diazinane [**8**] was observed by acquiring a crude <sup>1</sup>H NMR spectrum of an aliquot (Figure S44). The solution was cooled to 0 °C, then HCl<sub>(aq)</sub> (10%, 1.2 mL) and a solution of CuCl<sub>2</sub> (135 mg, 1.01 mmol) in H<sub>2</sub>O (7.5 mL) was added. After stirring at rt for 4 h, a 35% solution of NH<sub>3</sub> in H<sub>2</sub>O was added dropwise until a blue color persisted. The reaction mixture was cooled and extracted with EtOAc (3 × 15 mL). The organic phase washed with brine (50 mL) and H<sub>2</sub>O (50 mL). The organic phase was dried over MgSO<sub>4</sub>, filtered and the solvent removed under reduced pressure. The crude residue was purified by column chromatography (Teledyne Isco CombiFlash Rf+ system, 4 g SiO<sub>2</sub>, hexanes–Et<sub>2</sub>O, gradient elution) to yield 6-(4-tolyl)bicyclo[3.2.2]nona-3,8-dien-6-ol [(R)/(S)-**6**] as colourless solid (12 mg, 0.05 mmol, 48%). Characterisation data matched those shown above for [(R)/(S)-**6**].

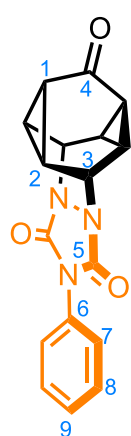

**6-Phenyl-4,6,9-triazahexacyclo[8.5.0.0<sup>2,15</sup>.0<sup>3,12</sup>.0<sup>4,9</sup>.0<sup>11,13</sup>]pentadecane-5,8,14-trione**

[**S1**]: Tricyclo[3.3.1.0<sup>2,8</sup>]nona-3,6-dien-9-one [**3**] (70 mg, 0.52 mmol) and 4-phenyl-1,2,4-triazoline-3,5-dione (PTAD) (180 mg, 1.03 mmol) were dissolved in anhydrous CH<sub>2</sub>Cl<sub>2</sub> (2.5 mL). The reaction mixture was heated to 50 °C and stirred for 72 h. The reaction mixture was cooled and diluted with CH<sub>2</sub>Cl<sub>2</sub> (20 mL), then washed with saturated aqueous NaHCO<sub>3</sub> (3 × 30 mL). The organic phase was separated and dried over MgSO<sub>4</sub>, filtered and the solvent removed under reduced pressure. The crude residue was purified by column chromatography (Teledyne Isco CombiFlash Rf+ system, 12 g SiO<sub>2</sub>,

CH<sub>2</sub>Cl<sub>2</sub>–EtOAc, gradient elution) to yield the desired title as a colourless solid. (45 mg, 0.15 mmol, 28%). **M. P.** 171 – 173 °C (decomp.). **<sup>1</sup>H NMR** (600 MHz, CD<sub>3</sub>CN) δ 7.56 – 7.48 (m, 4H, H<sub>8</sub> and H<sub>7</sub>), 7.47 – 7.42 (m, 1H, H<sub>9</sub>), 5.62 – 4.64 (m, 2H, H<sub>3</sub>), 2.33 (ddd, *J* = 7.8, 3.7, 2.7 Hz, 4H, H<sub>2</sub>), 1.67 (t, *J* = 7.7 Hz, 2H, H<sub>1</sub>). **<sup>13</sup>C NMR** (151 MHz, CD<sub>3</sub>CN) δ 202.4 (C<sub>5</sub>), 156.8 (C<sub>4</sub>), 132.8 (C<sub>6</sub>), 123.0 (C<sub>7</sub>), 129.4 (C<sub>9</sub>), 127.3 (C<sub>8</sub>), 48.9 (C<sub>3</sub>), 27.4 (C<sub>2</sub>), 24.7 (C<sub>1</sub>). **HR-ESI MS** *m/z* = 308.1032 [M+H]<sup>+</sup>, calculated for C<sub>17</sub>H<sub>14</sub>N<sub>3</sub>O<sub>3</sub><sup>+</sup>: 308.1035.

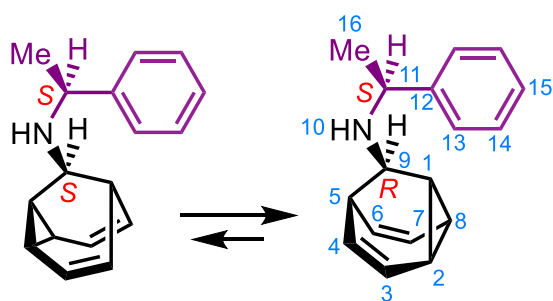

***N*-(*S*)-1-(Phenylethynyl)-tricyclo[3.3.1.0<sup>2,8</sup>]-nona-3,6-dien-9-amine [(*S,S*)/(*R,S*)-5]:** In an oven-dried round-bottomed flask fitted with a septum under a N<sub>2</sub> atmosphere, tricyclo[3.3.1.0<sup>2,8</sup>]nona-3,6-dien-9-one [**3**]: (80 mg, 0.61 mmol) and (*S*)-(-)-1-

phenylethylamine (250 μL, 1.96 mmol) were dissolved in anhydrous MeOH (0.80 mL). Glacial acetic acid (25 μL) was added dropwise to the stirred reaction mixture and left for 30 min. Sodium cyanoborohydride (50 mg, 0.80 mmol, 1.2 equiv.) was then added to the reaction mixture, which was left to stir for 16 h at 100 °C. The mixture was quenched with 5 drops of Et<sub>3</sub>N and the solvent was removed under reduced pressure. This material was dissolved in an aqueous solution of NaHCO<sub>3</sub> (50 mL) and extracted with CH<sub>2</sub>Cl<sub>2</sub> (5 × 25 mL). The combined organic extracts were washed with brine (1 × 50 mL), H<sub>2</sub>O (1 × 50 mL), dried over MgSO<sub>4</sub>, filtered and the solvent was removed under reduced pressure. The crude residue was purified by column chromatography (Teledyne Isco CombiFlash Rf<sup>+</sup> system, 4 g SiO<sub>2</sub>, hexanes–EtOAc, gradient including 1% Et<sub>3</sub>N in the elution) to give the title compound as a colourless oil (71 mg, 0.30 mmol, 49%). **<sup>1</sup>H NMR** (700 MHz, CDCl<sub>3</sub>) δ 7.36 – 7.28 (m, 4H, H<sub>13</sub> and H<sub>14</sub>), 7.22 (tt, *J* = 7.2, 1.5 Hz, 1H, H<sub>15</sub>), 5.81 (t, *J* = 7.8 Hz, 1H, H<sub>7</sub>),

5.52 (t,  $J = 7.7$  Hz, 1H, H<sub>3</sub>), 4.23 – 4.20 (m, 1H, H<sub>2</sub> or H<sub>4</sub>), 4.14 – 4.11 (m, 1H, H<sub>2</sub> or H<sub>4</sub>), 3.88 (q,  $J = 6.5$  Hz, 1H, H<sub>11</sub>), 3.85 – 3.82 (m, 1H, H<sub>8</sub> or H<sub>6</sub>), 3.76 – 3.72 (m, 1H, H<sub>8</sub> or H<sub>6</sub>), 2.35 – 2.33 (m, 1H, H<sub>9</sub>), 2.33 – 2.30 (m, 2H, H<sub>1</sub> and H<sub>5</sub>), 1.28 (d,  $J = 6.5$  Hz, 3H, H<sub>16</sub>), 1.03 (br s, 1H, H<sub>10</sub>). <sup>13</sup>C NMR (176 MHz, CDCl<sub>3</sub>)  $\delta$  146.1 (C<sub>12</sub>), 128.5 (C<sub>13</sub>), 126.9 (C<sub>15</sub>), 126.9 (C<sub>14</sub>), 123.1 (C<sub>7</sub>), 121.1 (C<sub>3</sub>), 81.4 (C<sub>2</sub> or C<sub>4</sub>), 77.4 (C<sub>8</sub> or C<sub>6</sub>), 71.2 (C<sub>2</sub> or C<sub>4</sub>), 67.4 (C<sub>8</sub> or C<sub>6</sub>), 54.9 (C<sub>11</sub>), 44.6 (C<sub>9</sub>), 29.7 (C<sub>1</sub> or C<sub>5</sub>), 29.1 (C<sub>5</sub> or C<sub>5</sub>), 25.3 (C<sub>16</sub>). HRMS-ASAP  $m/z = 238.1592$  [M+H]<sup>+</sup>, calculated for C<sub>17</sub>H<sub>20</sub>N: 238.1596.

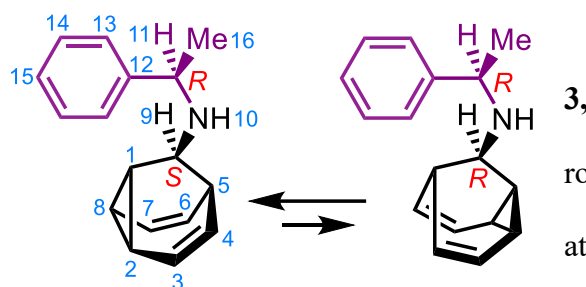

***N*-(*R*)-1-(Phenylethynyl)-tricyclo[3.3.1.0<sup>2,8</sup>]-nona-3,6-dien-9-amine [(*R,R*)/(*R,R*)-5]**: In an oven-dried round-bottomed flask fitted with a septum under a N<sub>2</sub> atmosphere, tricyclo[3.3.1.0<sup>2,8</sup>]nona-3,6-dien-9-one (80

mg, 0.61 mmol) and (*R*)-(+)-1-phenylethylamine (250  $\mu$ L, 1.96 mmol) were dissolved in anhydrous MeOH (0.80 mL). Glacial acetic acid (25  $\mu$ L) was added dropwise to the stirred reaction mixture and left for 30 min. Sodium cyanoborohydride (50 mg, 0.80 mmol, 1.2 equiv.) was then added to the reaction mixture, which was left to stir for 13 d at rt. The mixture was quenched with 5 drops of Et<sub>3</sub>N and the solvent was removed under reduced pressure. This material was dissolved in an aqueous solution of NaHCO<sub>3</sub> (50 mL) and extracted with CH<sub>2</sub>Cl<sub>2</sub> (5  $\times$  25 mL). The combined organic extracts were washed with brine (1  $\times$  50 mL), H<sub>2</sub>O (1  $\times$  50 mL), dried over MgSO<sub>4</sub>, filtered and the solvent was removed under reduced pressure. The crude residue was purified by column chromatography (Teledyne Isco CombiFlash Rf<sup>+</sup> system, 4 g SiO<sub>2</sub>, hexanes–EtOAc, gradient including 1% Et<sub>3</sub>N in the elution) to give the title compound as a colourless oil (112 mg, 0.47 mmol, 78%). <sup>1</sup>H NMR (600 MHz, CDCl<sub>3</sub>)  $\delta$  7.37 – 7.28 (m, 4H, H<sub>13</sub> and H<sub>14</sub>), 7.22 (tt,  $J = 7.1, 1.6$  Hz, 1H, H<sub>15</sub>), 5.81 (t,  $J = 7.8$  Hz, 1H, H<sub>7</sub>), 5.52 (t,  $J = 7.7$  Hz, 1H, H<sub>3</sub>), 4.23 – 4.20 (m, 1H, H<sub>2</sub> or H<sub>4</sub>), 4.14 –

4.11 (m, 1H, H<sub>2</sub> or H<sub>4</sub>), 3.88 (q,  $J = 6.5$  Hz, 1H, H<sub>11</sub>), 3.85 – 3.82 (m, 1H, H<sub>6</sub> or H<sub>8</sub>), 3.76 – 3.72 (m, 1H, H<sub>6</sub> or H<sub>8</sub>), 2.36 – 2.33 (m, 1H, H<sub>9</sub>), 2.33 – 2.30 (m, 2H, H<sub>1</sub> and H<sub>5</sub>), 1.28 (d,  $J = 6.5$  Hz, 3H, H<sub>16</sub>), 1.03 (br s, 1H, H<sub>10</sub>). **<sup>13</sup>C NMR** (151 MHz, CDCl<sub>3</sub>)  $\delta$  146.1 (C<sub>12</sub>), 128.5 (C<sub>13</sub>), 126.9 (C<sub>15</sub>), 126.8 (C<sub>14</sub>), 123.1 (C<sub>7</sub>), 121.1 (C<sub>3</sub>), 81.4 (C<sub>2</sub> or C<sub>4</sub>), 77.5 (C<sub>6</sub> or C<sub>8</sub>), 71.2 (C<sub>2</sub> or C<sub>4</sub>), 67.4 (C<sub>6</sub> or C<sub>8</sub>), 58.4 (C<sub>11</sub>), 45.2 (C<sub>9</sub>), 29.7 (C<sub>1</sub> or C<sub>5</sub>), 29.1 (C<sub>5</sub> or C<sub>1</sub>), 25.3 (C<sub>16</sub>). **HRMS-ASAP**  $m/z = 238.1592$  [M+H]<sup>+</sup>, calculated for C<sub>17</sub>H<sub>20</sub>N: 238.1596.

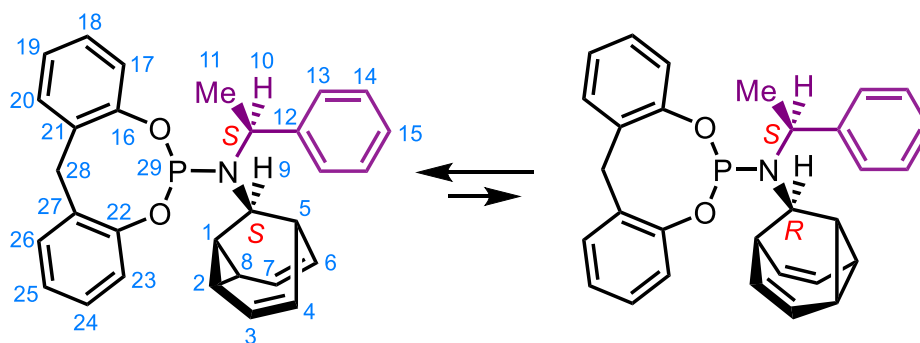

*N*-(1-Phenylethyl)-*N*-{tricyclo[3.3.1.0<sup>2,8</sup>]nona-2,6-dien-9-yl}-9,11-dioxo-10-phosphatricyclo[10.4.0.0<sup>3,8</sup>]hexadeca-1(16),3,5,7,12,14-hexaen-10-amine [(*R,S*)/(*S,S*)-L<sub>BB</sub>]: PCl<sub>3</sub> (27.5 mg, 200  $\mu$ mol), Et<sub>3</sub>N (162 mg, 1.6 mmol) and anhydrous CH<sub>2</sub>Cl<sub>2</sub> (2.0 mL) were placed in an oven-dried vial under an N<sub>2</sub> atmosphere and cooled to 0 °C. A solution of *N*-(*S*)-1-(phenylethynyl)-tricyclo[3.3.1.0<sup>2,8</sup>]-nona-3,6-dien-9-amine [(*S,S*)/(*R,S*)-5] (47.5 mg, 200  $\mu$ mol) in anhydrous CH<sub>2</sub>Cl<sub>2</sub> (2.0 mL) was added dropwise by syringe over 10 min and the resulting mixture stirred at 0 °C for 3 h. A solution of 2,2'-methylenediphenol (40.0 mg, 200  $\mu$ mol) in anhydrous CH<sub>2</sub>Cl<sub>2</sub> (2.0 mL) was added dropwise by syringe over 10 min, then the resulting mixture was allowed to warm to rt and stirred for 16 h. The solution was poured into a mixture of H<sub>2</sub>O (30 mL) and brine (5 mL), then extracted with CH<sub>2</sub>Cl<sub>2</sub> (4  $\times$  10 mL). The combined organic extracts were dried over K<sub>2</sub>CO<sub>3</sub> then the solvent was removed under reduced pressure. The crude residue was purified by column chromatography (Teledyne Isco CombiFlash Rf+ system, 12 g neutral Al<sub>2</sub>O<sub>3</sub>, hexanes–CH<sub>2</sub>Cl<sub>2</sub>,

gradient elution), giving the title compound as a colourless solid powder (41.4 mg, 89  $\mu\text{mol}$ , 44%), which was stored in a vial flushed with nitrogen to prevent oxidation.  **$^1\text{H}$  NMR** (600 MHz,  $\text{CDCl}_3$ )  $\delta$  7.63 – 7.58 (m, 2H,  $\text{H}_{13}$ ), 7.35 (t,  $J = 7.7$  Hz, 2H,  $\text{H}_{14}$ ), 7.31 (dt,  $J = 7.7$ , 2.1 Hz, 2H,  $\text{H}_{17}$  and  $\text{H}_{23}$ ), 7.28 – 7.23 (m, 1H,  $\text{H}_{15}$ ), 7.14 (t,  $J = 7.6$  Hz, 2H,  $\text{H}_{19}$  and  $\text{H}_{25}$ ), 7.03 – 6.97 (m, 4H,  $\text{H}_{18}$ ,  $\text{H}_{20}$ ,  $\text{H}_{26}$  and  $\text{H}_{24}$ ), 5.81 (t,  $J = 7.8$  Hz, 1H,  $\text{H}_3$  or  $\text{H}_7$ ), 5.48 (t,  $J = 7.5$  Hz, 1H,  $\text{H}_3$  or  $\text{H}_7$ ), 5.46 – 5.39 (m, 1H,  $\text{H}_{10}$ ), 4.42 (dd,  $J = 12.8$ , 3.0 Hz, 1H,  $\text{H}_{28}$ ), 4.09 (s, 2H,  $\text{H}_2$  and/or  $\text{H}_4$  and/or  $\text{H}_6$  and/or  $\text{H}_8$ ), 3.97 – 3.86 (m, 2H,  $\text{H}_2$  and/or  $\text{H}_4$  and/or  $\text{H}_6$  and/or  $\text{H}_8$ ), 3.51 (d,  $J = 12.8$  Hz, 1H,  $\text{H}_{28}$ ), 3.12 (d,  $J = 16.4$  Hz, 1H,  $\text{H}_9$ ), 2.65 – 2.59 (m, 1H,  $\text{H}_1$  or  $\text{H}_5$ ), 1.89 – 1.84 (m, 1H,  $\text{H}_1$  or  $\text{H}_5$ ), 1.73 (d,  $J = 7.1$  Hz, 3H,  $\text{H}_{11}$ ).  **$^{13}\text{C}$  NMR** (151 MHz,  $\text{CDCl}_3$ )  $\delta$  152.1 – 152.0 (m, 2C,  $\text{C}_{16}$  and  $\text{C}_{22}$ ), 143.6 ( $\text{C}_{12}$ ), 135.8 – 135.7 (m, 2C,  $\text{C}_{21}$  and  $\text{C}_{27}$ ), 129.9 (m,  $\text{C}_{17}$  and  $\text{C}_{23}$ ), 128.3 ( $\text{C}_{13}$ ), 128.2 ( $\text{C}_{14}$ ), 128.0 (2C,  $\text{C}_{19}$  and  $\text{C}_{25}$ ), 126.8 ( $\text{C}_{15}$ ), 124.8 ( $\text{C}_2$  or  $\text{C}_4$  or  $\text{C}_6$  or  $\text{C}_8$ ), 124.8 ( $\text{C}_2$  or  $\text{C}_4$  or  $\text{C}_6$  or  $\text{C}_8$ ), 124.4 ( $\text{C}_{20}$  or  $\text{C}_{26}$ ), 124.3 ( $\text{C}_{20}$  or  $\text{C}_{26}$ ), 123.2 ( $\text{C}_{18}$  or  $\text{C}_{24}$ ), 123.2 ( $\text{C}_{18}$  or  $\text{C}_{24}$ ), 121.5 (2C,  $\text{C}_2$  and/or  $\text{C}_4$  and/or  $\text{C}_6$  and/or  $\text{C}_8$ ), 51.9 ( $\text{C}_{10}$ ), 45.1 (d,  $J_{\text{CP}} = 17.3$  Hz,  $\text{C}_9$ ), 34.3 ( $\text{C}_{28}$ ), 31.7 (d,  $J_{\text{CP}} = 7.2$  Hz,  $\text{C}_1$  or  $\text{C}_5$ ), 30.5 (d,  $J_{\text{CP}} = 5.5$  Hz,  $\text{C}_1$  or  $\text{C}_5$ ), 20.2 (d,  $J_{\text{CP}} = 2.6$  Hz,  $\text{C}_{11}$ ).  **$^{31}\text{P}$  NMR** (243 MHz,  $\text{CDCl}_3$ )  $\delta$  139.3 ( $\text{P}_{29}$ ). **HR-ESI-MS**  $m/z = 466.1923$  [ $\text{M}+\text{H}$ ] $^+$  (calculated for  $\text{C}_{30}\text{H}_{29}\text{NO}_2\text{P}^+ = 466.1936$ ).

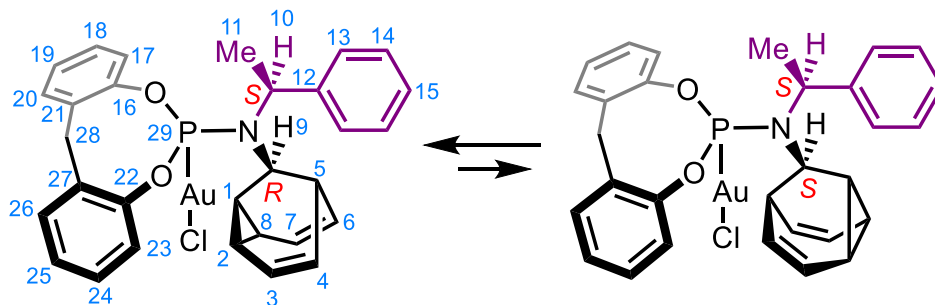

**Chloro({10-[(1-phenylethyl)(tricyclo[3.3.1.0<sup>2,8</sup>]nona-3,6-dien-9-yl})amino}-9-11-dioxa-10-phosphatricyclo-[10.4.0.0<sup>3,8</sup>]hexadeca-1(16),3,5,7,12,14-hexaen-10-yl}gold [(*R,S*)/(*S,S*)-**L<sub>B</sub>B**AuCl]:** **L<sub>B</sub>B** (6.5 mg, 14  $\mu\text{mol}$ ) and  $\text{Me}_2\text{S} \cdot \text{AuCl}$  (4.1 mg, 14  $\mu\text{mol}$ ) were dissolved in  $\text{CDCl}_3$  (0.7

mL) and sonicated for 10 min to dissolve the solids. The mixture was then evaporated under reduced pressure and dried under high vacuum, to give the title compound as a pale yellow solid (9.1 mg, 13  $\mu$ mol, 93%). **<sup>1</sup>H NMR** (600 MHz, CDCl<sub>3</sub>)  $\delta$  7.58 (d,  $J$  = 7.6 Hz, 2H, H<sub>13</sub>), 7.42 (dd,  $J$  = 7.7, 7.7 Hz, 2H, H<sub>14</sub>), 7.34 (t,  $J$  = 7.4 Hz, 1H, H<sub>15</sub>), 7.28 (d,  $J$  = 7.4 Hz, 2H, H<sub>20</sub> and H<sub>26</sub>), 7.17 – 7.11 (m, 2H, H<sub>18</sub> and H<sub>24</sub>), 7.11 – 7.06 (m, 2H, H<sub>19</sub> and H<sub>25</sub>), 6.87 (d,  $J$  = 8.1 Hz, 1H, H<sub>17</sub> or H<sub>23</sub>), 6.80 (d,  $J$  = 8.1 Hz, 1H, H<sub>17</sub> or H<sub>23</sub>), 5.92 (dd,  $J$  = 7.9, 7.9 Hz, 1H, H<sub>7</sub>), 5.61 (dd,  $J$  = 7.6, 7.6 Hz, 1H, H<sub>3</sub>), 5.14 (dq,  $J$  = 22.0, 7.0 Hz, 1H, H<sub>10</sub>), 4.63 – 4.58 (m, 1H, H<sub>6</sub>), 4.55 – 4.49 (m, 1H, H<sub>4</sub>), 4.27 (dd,  $J$  = 13.0, 4.6 Hz, 1H, H<sub>28</sub>), 4.02 – 3.96 (m, 1H, H<sub>8</sub>), 3.94 (d,  $J$  = 12.7 Hz, 1H, H<sub>9</sub>), 3.92 – 3.86 (m, 1H, H<sub>2</sub>), 3.47 (d,  $J$  = 13.0 Hz, 1H, H<sub>28</sub>), 2.86 – 2.80 (m, 1H, H<sub>5</sub>), 2.60 – 2.55 (m, 1H, H<sub>1</sub>), 1.96 (d,  $J$  = 6.9 Hz, 3H, H<sub>11</sub>). **<sup>13</sup>C NMR** (151 MHz, CDCl<sub>3</sub>)  $\delta$  149.0 (d,  $J$  = 2.9 Hz, C<sub>16</sub> or C<sub>22</sub>), 148.6 (d,  $J_{CP}$  = 3.1 Hz, C<sub>16</sub> or C<sub>22</sub>), 142.9 (d,  $J_{CP}$  = 3.6 Hz, C<sub>12</sub>), 134.7 (d,  $J_{CP}$  = 3.9 Hz, C<sub>21</sub> or C<sub>27</sub>), 134.6 (d,  $J_{CP}$  = 3.8 Hz, C<sub>21</sub> or C<sub>27</sub>), 130.1 (d,  $J_{CP}$  = 2.2 Hz, C<sub>20</sub> or C<sub>26</sub>), 130.1 (d,  $J_{CP}$  = 2.2 Hz, C<sub>20</sub> or C<sub>26</sub>), 129.1 (C<sub>18</sub> or C<sub>24</sub>), 129.1 (C<sub>18</sub> or C<sub>24</sub>), 128.7 (C<sub>14</sub>), 127.7 (C<sub>13</sub>), 127.6 (C<sub>15</sub>), 126.8 (C<sub>19</sub> or C<sub>25</sub>), 126.8 (C<sub>19</sub> or C<sub>25</sub>), 123.6 (C<sub>7</sub>), 123.2 (C<sub>17</sub> or C<sub>23</sub>), 123.2 (C<sub>17</sub> or C<sub>23</sub>), 121.7 (C<sub>3</sub>), 84.8 (C<sub>4</sub>), 81.0 (C<sub>6</sub>), 53.1 (d,  $J_{CP}$  = 8.9 Hz, C<sub>10</sub>), 47.9 (d,  $J_{CP}$  = 5.9 Hz, C<sub>9</sub>), 33.5 (C<sub>28</sub>), 31.1 (C<sub>5</sub>), 28.3 (C<sub>1</sub>), 21.7 (d,  $J$  = 3.4 Hz, C<sub>11</sub>). **<sup>31</sup>P NMR** (162 MHz, CDCl<sub>3</sub>)  $\delta$  120.9 (P<sub>29</sub>). **HR-ESI-MS**  $m/z$  = 720.1142 [M+Na]<sup>+</sup> (calculated for C<sub>30</sub>H<sub>28</sub>AuClINNaO<sub>2</sub>P<sup>+</sup> = 720.1110).

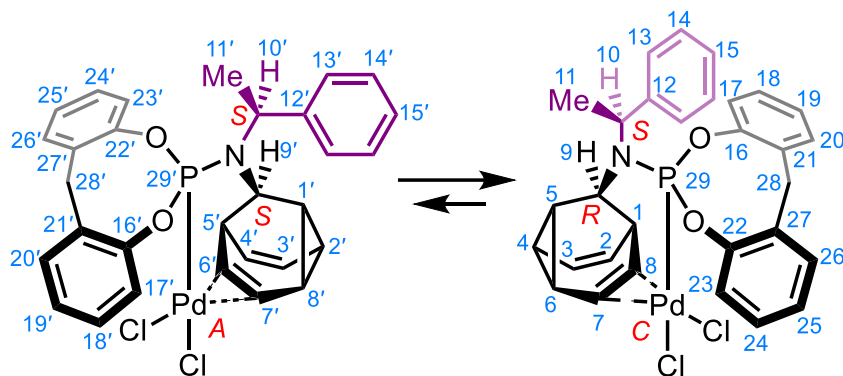

**Dichloro({10-[(1-phenylethyl)(tricyclo[3.3.1.0<sup>2,8</sup>]nona-3,6-dien-9-yl})amino]-9-11-dioxa-10-phosphatricyclo-[10.4.0.0<sup>3,8</sup>]hexadeca-1(16),3,5,7,12,14-hexaen-10-yl]palladium**

[(*A,S,S*)/(*C,R,S*)-**LBB**PdCl<sub>2</sub>]: **LBB** (10.0 mg, 21.5 μmol) and PdCl<sub>2</sub>·(MeCN)<sub>2</sub> (5.6 mg, 21.5 μmol) were suspended in CDCl<sub>3</sub> (0.7 mL) at rt and sonicated for 15 min until a homogeneous solution was formed. The solution was evaporated under reduced pressure to give the title compound as a pale yellow solid (13.5 mg, 0.02 mmol, 98%). Where possible, the <sup>1</sup>H and <sup>13</sup>C NMR resonances of the title compound have been assigned to a site in the structure of a specific diastereoisomer based on two-dimensional spectra acquired in the slow exchange regime (at 240 K). Unambiguous peak assignments are not possible in some cases on account of signal overlap. The number of nuclei represented by each signal is given without adjustment for the uneven population of the two diastereoisomers, which are present in a 1.3:1 ratio of (*C,R,S*)-**LBB**PdCl<sub>2</sub> to (*A,S,S*)-**LBB**PdCl<sub>2</sub> at 240 K. **<sup>1</sup>H NMR** (500 MHz, CDCl<sub>3</sub>, 240 K) δ 7.53 (d, *J* = 7.6 Hz, 2H), 7.46 – 7.27 (m, 16H), 7.23 – 7.06 (m, 8H), 6.81 – 6.77 (m, 1H, H<sub>7</sub>), 6.77 – 6.73 (m, 1H, H<sub>7</sub>), 6.10 (dd, *J* = 7.3, 4.6 Hz, 1H, H<sub>6'</sub>), 6.04 – 5.96 (m, 2H, H<sub>8</sub> and H<sub>4'</sub>), 5.90 – 5.82 (m, 2H, H<sub>3</sub> and H<sub>3'</sub>), 5.74 (t, *J* = 7.9 Hz, 1H, H<sub>2</sub>), 5.64 (q, *J* = 6.8 Hz, 1H, H<sub>10</sub>), 5.58 (q, *J* = 6.9 Hz, 1H, H<sub>10'</sub>), 4.43 (dd, *J* = 13.2, 3.4 Hz, 1H, H<sub>28'</sub>), 4.30 (dd, *J* = 13.2, 3.3 Hz, 1H, H<sub>28</sub>), 3.65 (d, *J* = 13.2 Hz, 1H, H<sub>28'</sub>), 3.61 (d, *J* = 13.2 Hz, 1H, H<sub>28</sub>), 3.12 – 3.05 (m, 2H, H<sub>6</sub> and H<sub>5</sub>), 3.02 – 2.95 (m, 2H, H<sub>5</sub> and H<sub>4</sub>), 2.94 – 2.82 (m, 2H, H<sub>9</sub> and H<sub>8</sub>), 2.73 –



2.64 (m, 1H, H<sub>2'</sub>), 2.57 – 2.40 (m, 2H, H<sub>1</sub> and H<sub>9'</sub>), 1.73 (d,  $J = 7.0$  Hz, 3H, H<sub>11</sub>), 1.69 – 1.64 (m, 1H, H<sub>1'</sub>), 1.61 (d,  $J = 6.8$  Hz, 3H, H<sub>11'</sub>). **<sup>13</sup>C NMR** (151 MHz, CDCl<sub>3</sub>, 240 K)  $\delta$  151.3, 151.2, 151.1, 148.5, 148.4, 139.0 (d,  $J_{CP} = 5.1$  Hz, C<sub>12</sub>), 138.9 (C<sub>12'</sub>), 131.0, 131.0, 130.1, 130.0, 129.4, 129.3, 128.8, 128.7, 128.6, 128.3, 128.2, 127.7, 126.6, 126.1, 125.9, 125.7 (C<sub>2'</sub>), 125.7, 125.1, 123.6, 123.0, 122.6, 108.0 (C<sub>7'</sub>), 107.7 (C<sub>7</sub>), 88.8 (C<sub>6</sub>), 88.5 (C<sub>8'</sub>), 55.6 (d,  $J_{CP} = 5.4$  Hz, C<sub>10'</sub>), 54.5 (d,  $J_{CP} = 5.8$  Hz, C<sub>10</sub>), 45.0, 44.9, 44.7, 44.6, 36.4, 35.2, 33.6 (C<sub>28'</sub>), 33.5 (C<sub>28</sub>), 33.4, 33.3, 29.5, 29.5, 26.8, 25.6, 18.3 (C<sub>11'</sub>), 18.1 (C<sub>11</sub>). The spectral data acquired at 298 K are also given below. At this temperature, the diastereoisomers are in fast exchange and most resonances are resolved, representing an average of the two structures. They are assigned using the labelling system shown for (C,*R*,*S*)-LBBPdCl<sub>2</sub>. Some peaks are broadened into the baseline at this temperature, so they are either missing or are reported as broad (br). **<sup>1</sup>H NMR** (499 MHz, CDCl<sub>3</sub>, 298 K)  $\delta$  7.48 (d,  $J = 7.6$  Hz, 2H, H<sub>13</sub>), 7.40 (t,  $J = 7.5$  Hz, 2H, H<sub>14</sub>), 7.36 – 7.33 (m, 1H, H<sub>15</sub>), 7.32 (d,  $J = 7.4$  Hz, 2H, H<sub>20</sub> and H<sub>26</sub>), 7.28 – 7.17 (m, 4H, H<sub>17</sub>, H<sub>18</sub>, H<sub>23</sub> and H<sub>24</sub>), 7.13 (t,  $J = 6.3$  Hz, 2H, H<sub>19</sub> and H<sub>25</sub>), 6.79 (t,  $J = 6.5$  Hz, 1H, H<sub>7</sub>), 6.34 – 5.44 (br, 2H), 5.86 (t,  $J = 7.6$  Hz, 1H, H<sub>3</sub>), 5.67 – 5.58 (m, 1H, H<sub>10</sub>), 4.37 (s, 1H, H<sub>28</sub>), 3.64 (d,  $J = 13.3$  Hz, 1H, H<sub>28</sub>), 3.36 – 2.19 (br, 4H), 2.96 (d,  $J_{HP} = 31.6$  Hz, 1H, H<sub>9</sub>), 1.75 – 1.65 (m, 3H, H<sub>11</sub>). **<sup>13</sup>C NMR** (151 MHz, CDCl<sub>3</sub>, 298 K)  $\delta$  139.4 (d,  $J_{CP} = 3.6$  Hz, C<sub>12</sub>), 130.2 (C<sub>20</sub> and C<sub>26</sub>), 128.9 (C<sub>14</sub>), 128.6 (br), 128.6 (br), 128.3 (C<sub>15</sub>), 128.1 (br, C<sub>13</sub>), 126.3 (br, C<sub>19</sub> and C<sub>25</sub>), 125.4 (br, C<sub>3</sub>), 123.4 (br, C<sub>17</sub>, C<sub>18</sub>, C<sub>23</sub> and C<sub>24</sub>), 107.8 (C<sub>7</sub>), 55.2 (C<sub>10</sub>), 45.1 (d,  $J_{CP} = 15.1$  Hz, C<sub>9</sub>), 33.9 (C<sub>28</sub>), 18.2 (C<sub>11</sub>). **<sup>31</sup>P NMR** (243 MHz, CDCl<sub>3</sub>, 298 K)  $\delta$  72.4 (P<sub>29</sub>). **LR-ESI-MS**  $m/z = 642.307$  [M+H]<sup>+</sup> (calculated for C<sub>30</sub>H<sub>29</sub>Cl<sub>2</sub>NO<sub>2</sub>PPd<sup>+</sup> = 642.0348).

**Note on the stereochemical assignment of (A,*S*,*S*)/(C,*R*,*S*)-LBB·PdCl<sub>2</sub>:** The complex has been treated as a distorted trigonal bipyramidal complex (see Figure 4 in the main text and the X-ray Crystallographic Analysis section, Figures S67 and S68) for the assignment of stereochemical

descriptor to the Pd centre, bearing apical P and Cl ligands, with equatorial Cl and C sites.<sup>6</sup> Although olefin ligands are typically regarded as a monodentate in organometallic nomenclature, it is necessary to treat the coordinated olefin of **L<sub>BB</sub>** as an  $\eta^2$ -donor to account for its dissymmetry and accurately describe the stereochemical environment of the Pd centre. Consequently, the Pd centre is treated as being formally pentacoordinate. Treating the complex as being square planar and bearing a monodentate ligand would not capture the three-dimensional stereochemistry of the coordination as the olefin ligand is held in an orthogonal orientation to the Cl-Pd-Cl plane. Comparing the theoretical structures Pd1 and Pd2 (Figure S1) illustrates that, even in the absence of a fixed stereocentre as part of the olefin ligand, the Pd coordination environment is chiral. The Cahn-Ingold-Prelog (CIP) priority of the ligands for stereochemical assignment of the Pd is Cl>P>C6>C7. Its configuration index is *TBPY-5-12*. Note also that the stereochemical descriptor for some of the sp<sup>3</sup>-C stereocentres of the ligand (e.g., the barbaralane 9-position) are changed from the ligand precursor as the Pd coordination alters the CIP priorities assigned to the barbaralane skeleton.

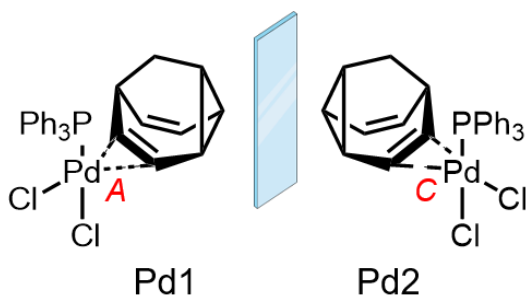

**Figure S1.** A theoretical enantiomeric pair of Pd complexes arising from the coordination of a dissymmetric olefin ligand (barbaralane) that is oriented orthogonally to the Cl-Pd-Cl plane.

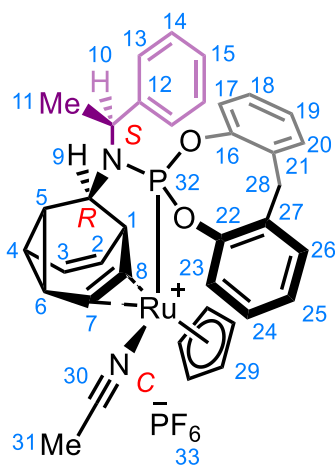

*N*-[(1-Phenylethyl)({tricyclo[3.3.1.0<sup>2,8</sup>]nona-2,6-dien-9-yl})amino]-19,20-dioxa-phospha-2-ruthenpentacyco[9.8.2.0<sup>3,7</sup>.0<sup>7,21</sup>.0<sup>13,18</sup>]henicosa-7(21),8,10,13,15,17-hexaen-2-yl}acetonitrile hexafluorophosphate [(*C,R,S*)-LBBRuCp(NCMe)·PF<sub>6</sub>]: LBB (6.1 mg, 13.1 μmol) and CpRu(NCMe)<sub>3</sub>·PF<sub>6</sub> (5.7 mg, 13.1 μmol) were suspended in CDCl<sub>3</sub> (0.7 mL) at rt and sonicated for 5 min until a homogeneous solution was formed. The resulting complex was isolated by slow

diffusion of *i*Pr<sub>2</sub>O vapour into the solution, which led to formation of a yellow precipitate. The mother liquor was decanted and the solid dried under reduced pressure. The resulting crude residue was then redissolved in CDCl<sub>3</sub> (0.7 mL). The solution was passed through a syringe tip filter then allowed to slowly evaporate to approximately one quarter of the volume, leading to the formation of crystals. The mother liquor was decanted and the solid dried under reduced pressure, affording the title compound as a yellow solid (7.4 mg, 9 μmol, 69%). The title complex is isolated as a single stereoisomer upon crystallisation but equilibrates over a period of several minutes-to-hours at room temperature in CDCl<sub>3</sub> solution, giving an approximately 4:1 mixture of the (*C,R,S*)- to the (*A,S,S*)-complex. NMR spectra for characterisation were obtained using a freshly crystallised sample and measured immediately after dissolution to allow assignment of the (*C,R,S*)-complex in its near-isomerically-pure form. Where possible, the <sup>1</sup>H and <sup>13</sup>C NMR resonances of the title compound have been assigned to a site in the structure based on two-dimensional spectra. Unambiguous peak assignments are not possible in some cases on account of signal overlap in the aromatic regions.

**<sup>1</sup>H NMR** (400 MHz, CDCl<sub>3</sub>) δ 7.62 – 7.49 (m, 3H, H<sub>13-15</sub> and/or H<sub>18-20</sub> and/or H<sub>25-26</sub>), 7.41 – 7.21 (m, 8H, H<sub>13-15</sub> and/or H<sub>18-20</sub> and/or H<sub>25-26</sub>), 6.99 (d, *J* = 8.1 Hz, 1H, H<sub>23</sub>), 6.88 (d, *J* = 6.9 Hz, 1H, H<sub>17</sub>), 6.12 (t, *J* = 7.9 Hz, 1H, H<sub>2</sub>), 5.99 (dd, *J* = 9.0, 6.2 Hz, 1H, H<sub>3</sub>), 5.84 – 5.73 (m, 1H, H<sub>10</sub>), 4.82

(dd,  $J = 8.0, 4.4$  Hz, 1H, H<sub>7</sub>), 4.62 (dd,  $J = 12.9, 3.7$  Hz, 1H, H<sub>28</sub>), 4.16 (s, 5H, H<sub>29</sub>), 4.01 – 3.94 (m, 1H, H<sub>8</sub>), 3.68 (d,  $J = 13.0$  Hz, 1H, H<sub>28</sub>), 3.49 – 3.40 (m, 1H, H<sub>1</sub>), 3.19 (d,  $J = 22.0$  Hz, 1H, H<sub>9</sub>), 2.56 (d,  $J = 1.4$  Hz, 3H, H<sub>31</sub>), 2.09 – 1.98 (m, 1H, H<sub>4</sub>), 1.93 – 1.84 (m, 1H, H<sub>6</sub>), 1.77 (d,  $J = 7.0$  Hz, 3H, H<sub>11</sub>), 0.33 – 0.24 (m, 1H, H<sub>5</sub>). **<sup>13</sup>C NMR** (151 MHz, CDCl<sub>3</sub>)  $\delta$  149.3, 141.6 (d,  $J_{CP} = 7.3$  Hz, C<sub>12</sub>), 135.0, 133.9, 130.8, 129.7 (C<sub>30</sub>), 128.7, 128.5, 128.3, 128.1, 128.0, 128.0, 127.0, 126.5, 126.3, 124.7 (C<sub>23</sub>), 123.3 (C<sub>17</sub>), 84.7 (d,  $J_{CP} = 2.1$  Hz, C<sub>29</sub>), 52.9 (d,  $J_{CP} = 6.7$  Hz, C<sub>10</sub>), 51.0 (C<sub>7</sub>), 47.4 (d,  $J = 15.7$  Hz, C<sub>9</sub>), 46.9 (C<sub>8</sub>), 35.5 (d,  $J = 19.1$  Hz, C<sub>1</sub>), 34.0 (C<sub>28</sub>), 25.0 (C<sub>6</sub>), 24.9 (C<sub>4</sub>), 19.1 (C<sub>5</sub>), 16.2 (C<sub>11</sub>), 4.8 (C<sub>31</sub>). **<sup>19</sup>F NMR** (376 MHz, CDCl<sub>3</sub>)  $\delta$  –73.0 (d,  $J_{PF} = 712.3$  Hz, F<sub>33</sub>). **<sup>31</sup>P NMR** (162 MHz, CDCl<sub>3</sub>)  $\delta$  162.8 (d,  $J_{PH} = 20.6$  Hz, P<sub>32</sub>), –144.3 (hept,  $J_{PF} = 712.3$  Hz, P<sub>33</sub>). **HR-ESI-MS**  $m/z = 667.1605$  [M–PF<sub>6</sub>]<sup>+</sup> (calculated for C<sub>37</sub>H<sub>36</sub>N<sub>2</sub>O<sub>2</sub>P<sup>96</sup>Ru<sup>+</sup> = 667.1590).

**Note on the stereochemical assignment of (C,R,S)-L<sub>BB</sub>RuCp(NCMe)·PF<sub>6</sub>:** The complex has been treated as a distorted square pyramidal complex (see Figure 5 in the main text and the X-ray Crystallographic Analysis section, Figure S69) for the assignment of stereochemical descriptor to the Ru centre, bearing an apical Cp ligand, with the remaining N, P, and two C coordination sites close to being in a plane.<sup>6</sup> The CIP priority of the ligands for stereochemical assignment of the Ru is Cp>P>N>C<sub>8</sub>>C<sub>7</sub>. Note that Cp ( $\mu_5$ -C<sub>5</sub>H<sub>5</sub><sup>–</sup>) is treated as a pseudo-atom of atomic number 30 and mass number 60 according to convention for arene-type polyhapto ligands.<sup>7</sup> The configuration index of the (C,R,S)- and (A,R,S)-complexes are *SPY-5-25*, whereas the (C,S,S)- and (A,S,S)-complexes are *SPY-5-24*. Note also that the stereochemical descriptor for some of the sp<sup>3</sup>-C stereocentres of the ligand (e.g., the barbaralane 9-position) are changed from the ligand precursor as the Ru coordination alters the CIP priorities assigned to the barbaralane skeleton.

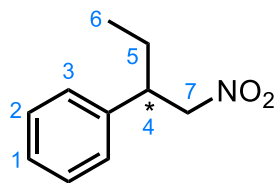

**1-Nitro-2-phenylbutane [NPB]:** To an oven-dried vial was added

$\text{Cu}(\text{OTf})_2$  (1.4 mg, 4.0  $\mu\text{mol}$ , 2 mol%), *N*-(1-phenylethyl)-*N*-{tricyclo[3.3.1.0<sup>2,8</sup>]nona-2,6-dien-9-yl}-9,11-dioxa-10-phosphatricyclo-o-[10.4.0.0<sup>3,8</sup>]hexadeca-1(16),3,5,7,12,14-hexaen-10-amine [**LBB**] (1.9 mg, 4.0  $\mu\text{mol}$ , 2 mol%) and anhydrous PhMe (2.0 mL) under a  $\text{N}_2$  atmosphere. The mixture was stirred for 30 min at rt. *trans*- $\beta$ -Nitrostyrene (29.8 mg, 200  $\mu\text{mol}$ ) was added, the vial flushed with  $\text{N}_2$ , and the mixture was cooled to  $-78^\circ\text{C}$ . A solution of  $\text{Et}_2\text{Zn}$  in hexanes (240  $\mu\text{L}$ , 1.0 M, 240  $\mu\text{mol}$ ) was added dropwise and the resulting mixture was stirred at  $-78^\circ\text{C}$  for 12 h. The mixture was then warmed to rt and a saturated aqueous solution of  $\text{NH}_4\text{Cl}$  was added (3 mL). The biphasic mixture was extracted with  $\text{Et}_2\text{O}$  ( $3 \times 3$  mL). The organic extracts were combined, dried over  $\text{MgSO}_4$ , and concentrated under reduced pressure. The residue was purified by column chromatography (Teledyne Isco CombiFlash Rf+ system, 4 g  $\text{SiO}_2$ , hexanes– $\text{EtOAc}$  gradient) to give the title compound as a colourless oil (22.9 mg, 128  $\mu\text{mol}$ , 64%).  **$^1\text{H}$  NMR** (400 MHz,  $\text{CDCl}_3$ , 298 K)  $\delta$  7.38 – 7.30 (m, 2H,  $\text{H}_3$ ), 7.30 – 7.27 (m, 1H,  $\text{H}_1$ ), 7.21 – 7.15 (m, 2H,  $\text{H}_2$ ), 4.63 – 4.48 (m, 2H,  $\text{H}_7$ ), 3.42 – 3.29 (m, 1H,  $\text{H}_4$ ), 1.86 – 1.62 (m, 2H,  $\text{H}_5$ ), 0.84 (t,  $J = 7.4$  Hz, 3H,  $\text{H}_6$ ). The scalemic mixture was determined to have a 69:31 enantiomeric ratio (Figure S43 and Table S1) by chiral HPLC (ChiralPak OD column, isocratic elution with 98:2 hexanes–*i*PrOH, 212 nm detection).

Spectroscopic data are consistent with those reported previously.<sup>5</sup>

### 3. $^1\text{H}$ , $^{13}\text{C}$ , $^{19}\text{F}$ and $^{31}\text{P}$ NMR Spectroscopic Characterisation of Synthesised Compounds

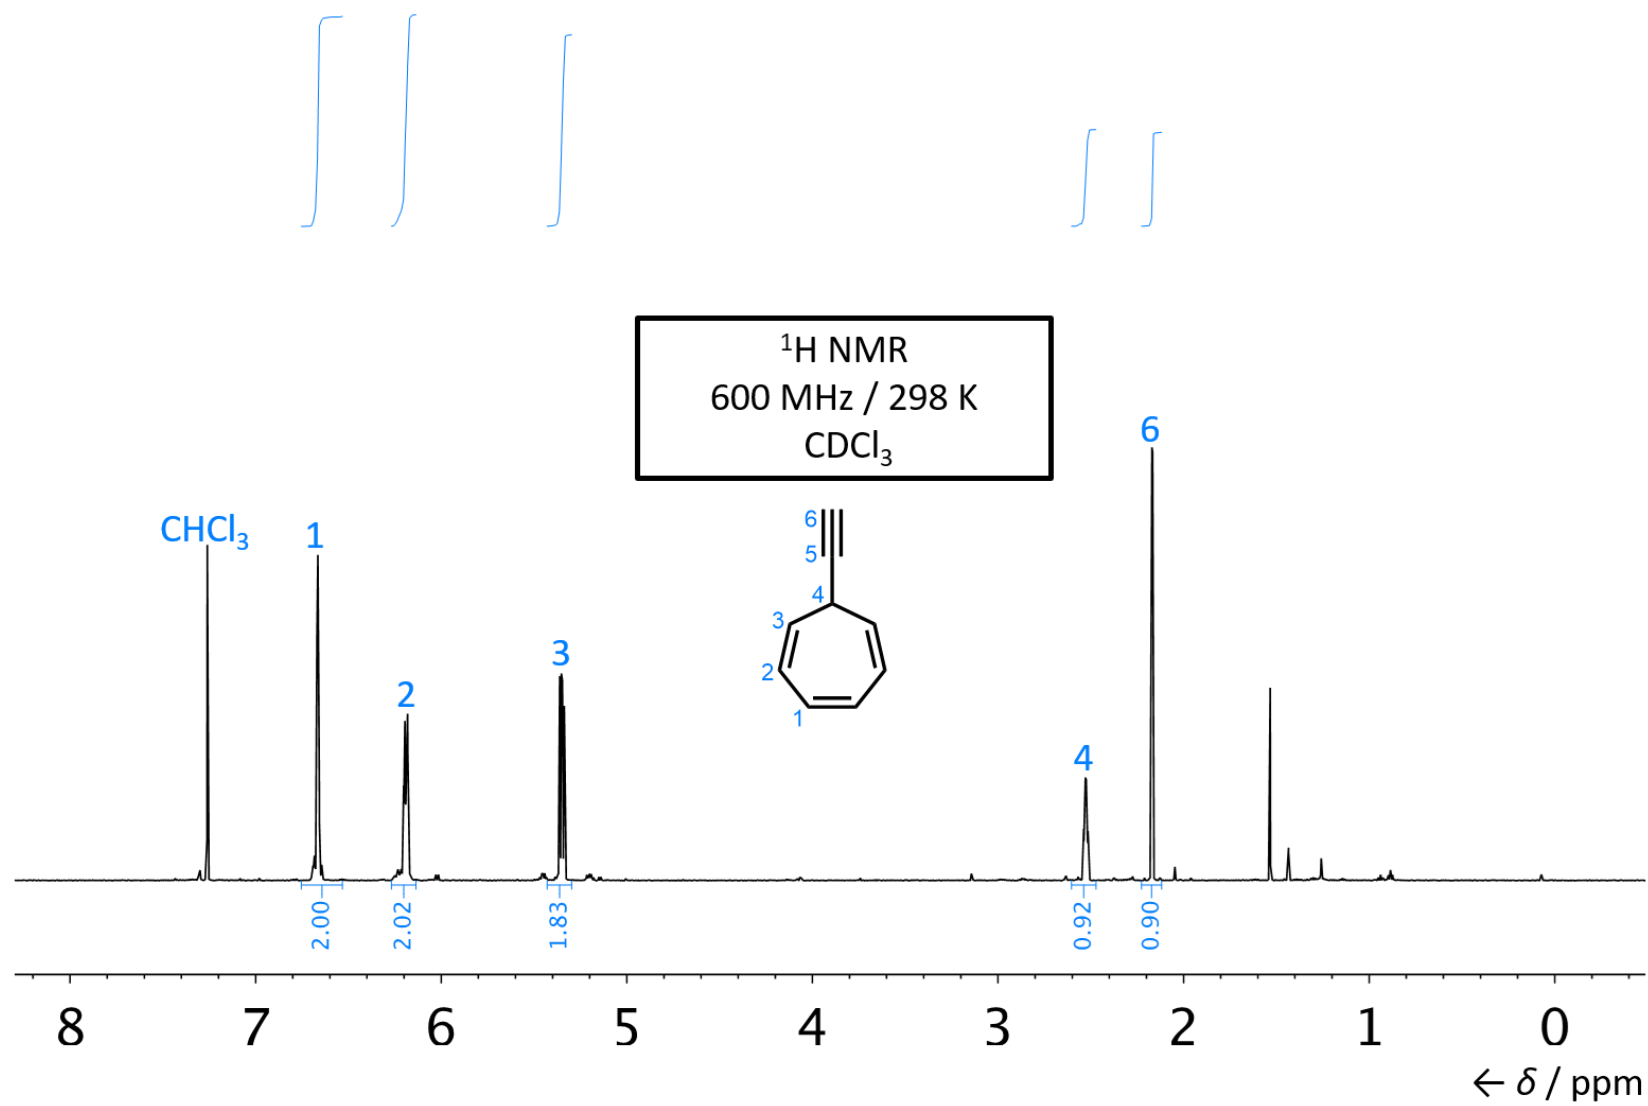

Figure S2.  $^1\text{H}$  NMR spectrum of S2.

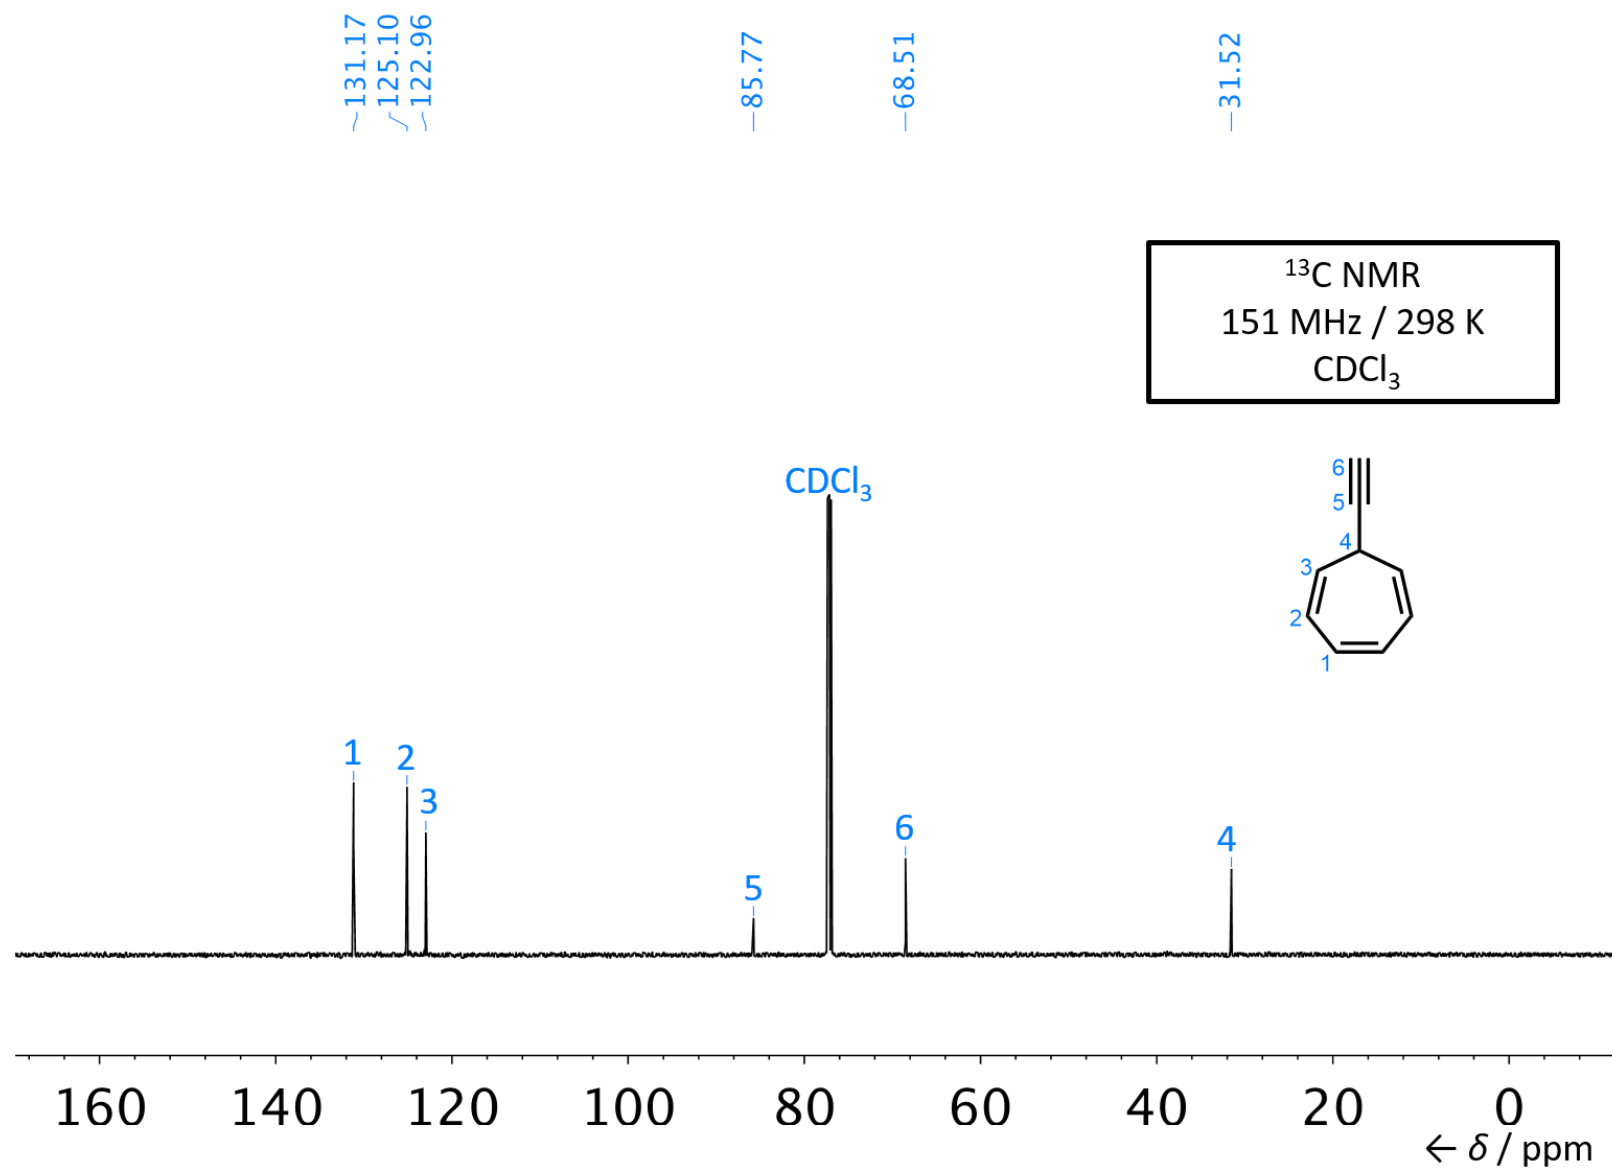

**Figure S3.** <sup>13</sup>C NMR spectrum of **S2**.

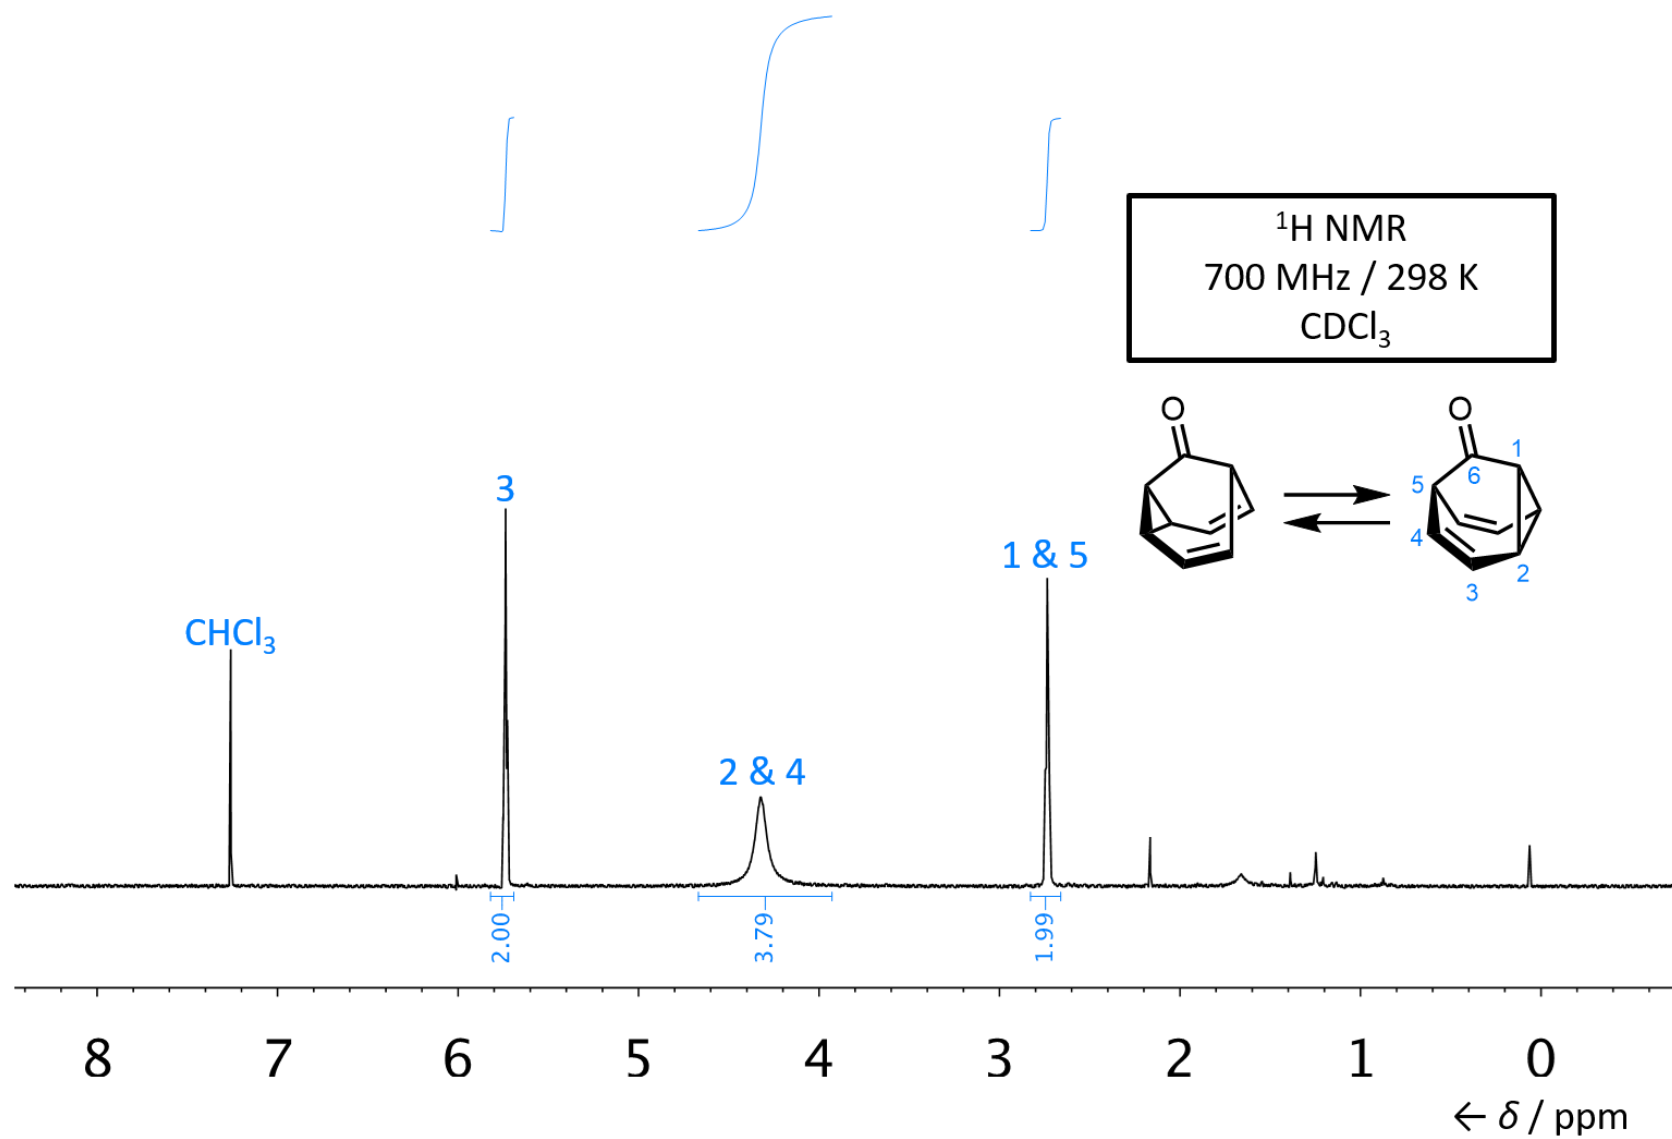

**Figure S4.** <sup>1</sup>H NMR spectrum of **3**.



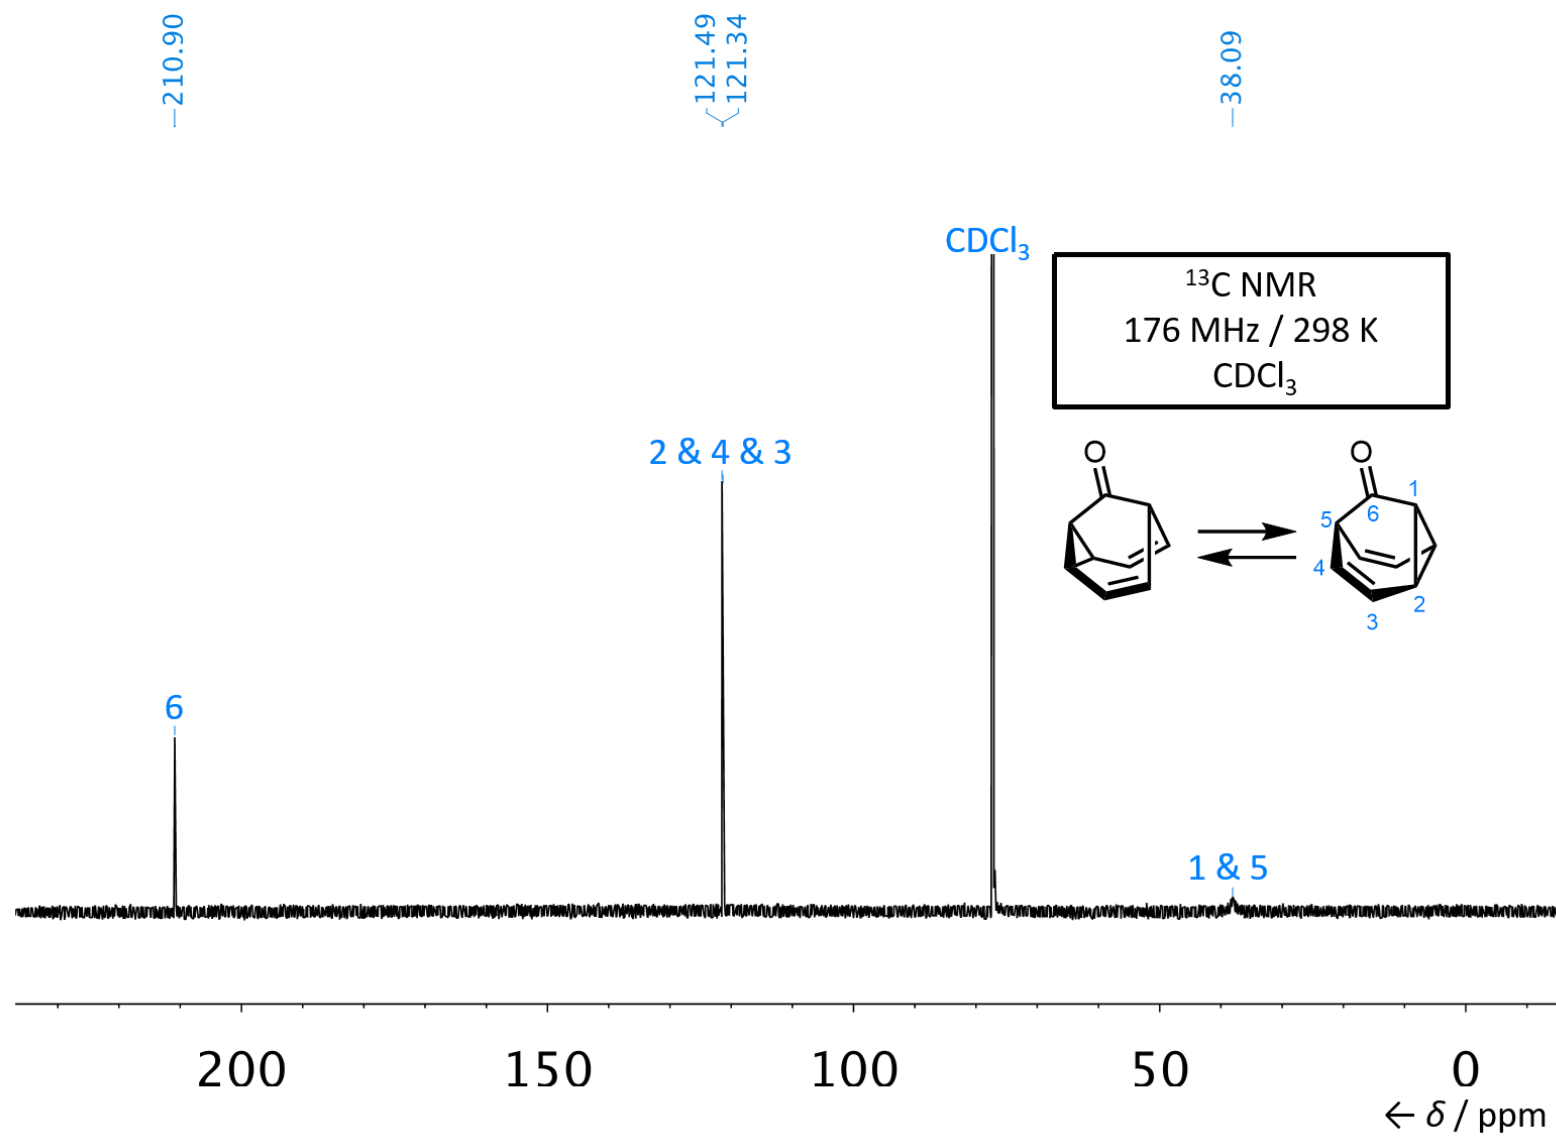

**Figure S5.**  $^{13}\text{C}$  NMR spectrum of **3**.

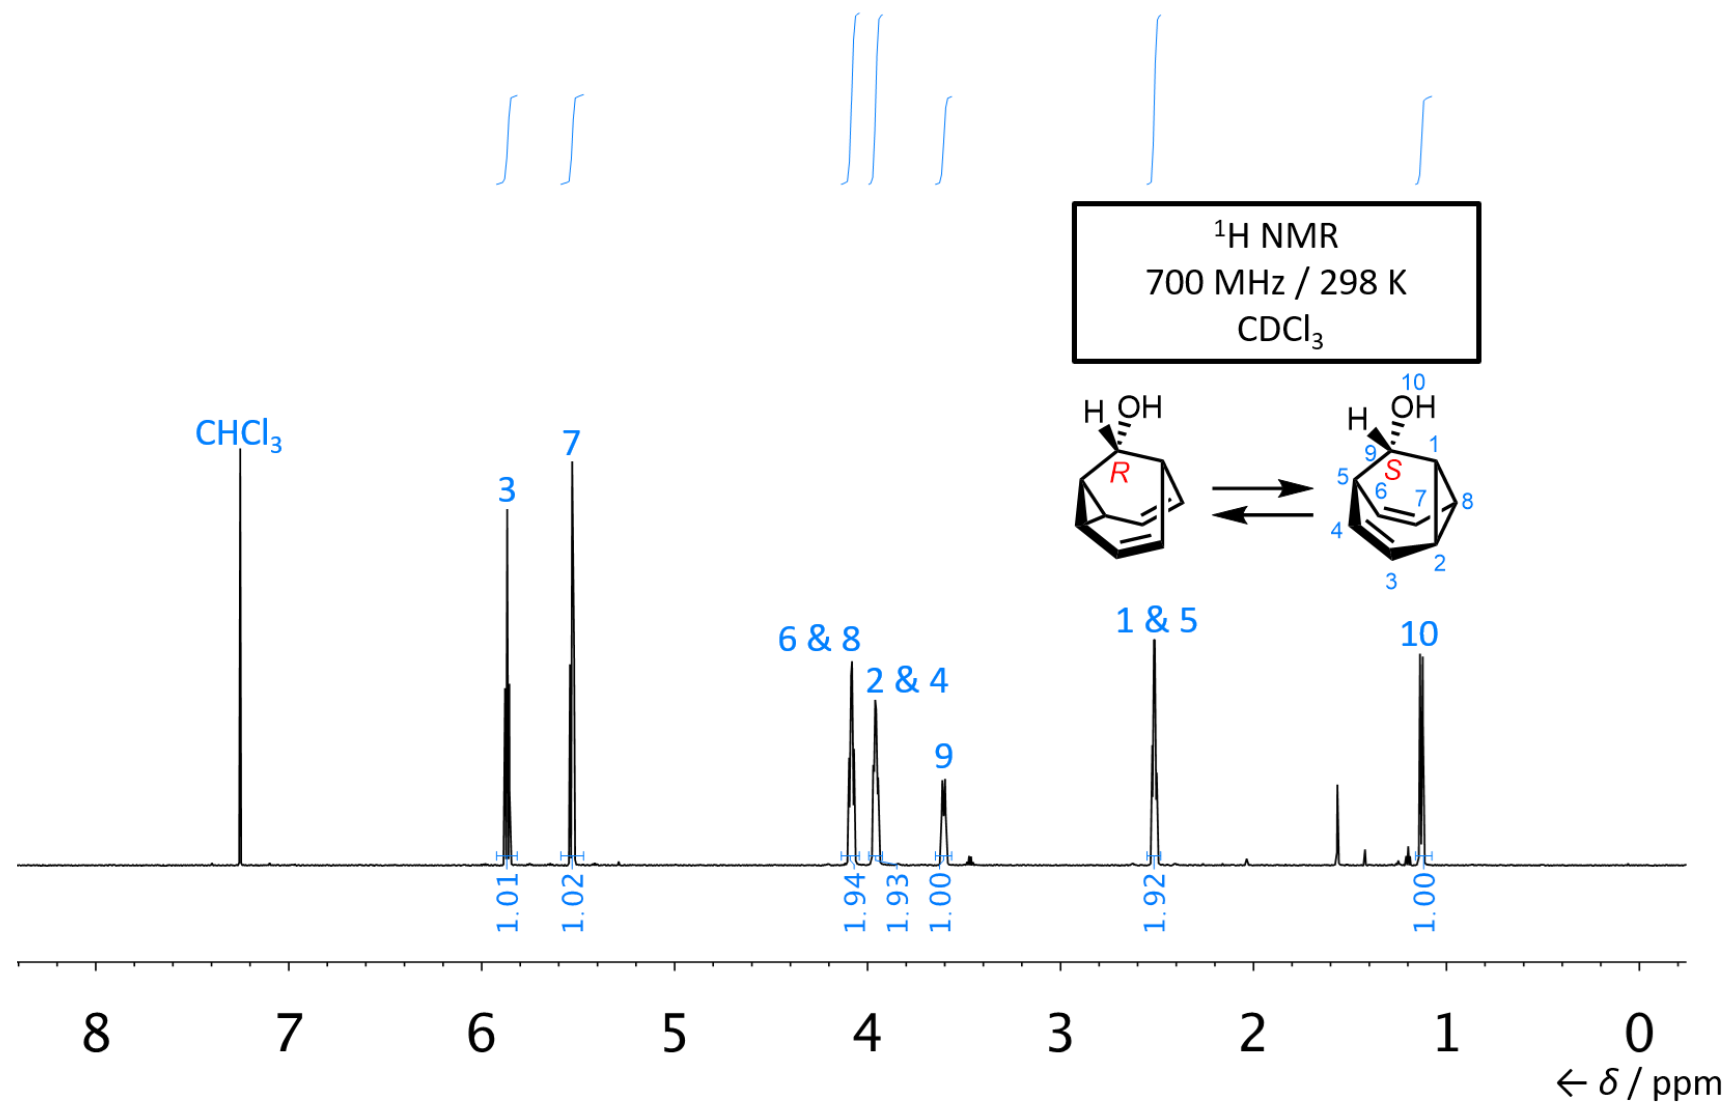

Figure S6. <sup>1</sup>H NMR spectrum of (R)/(S)-1.

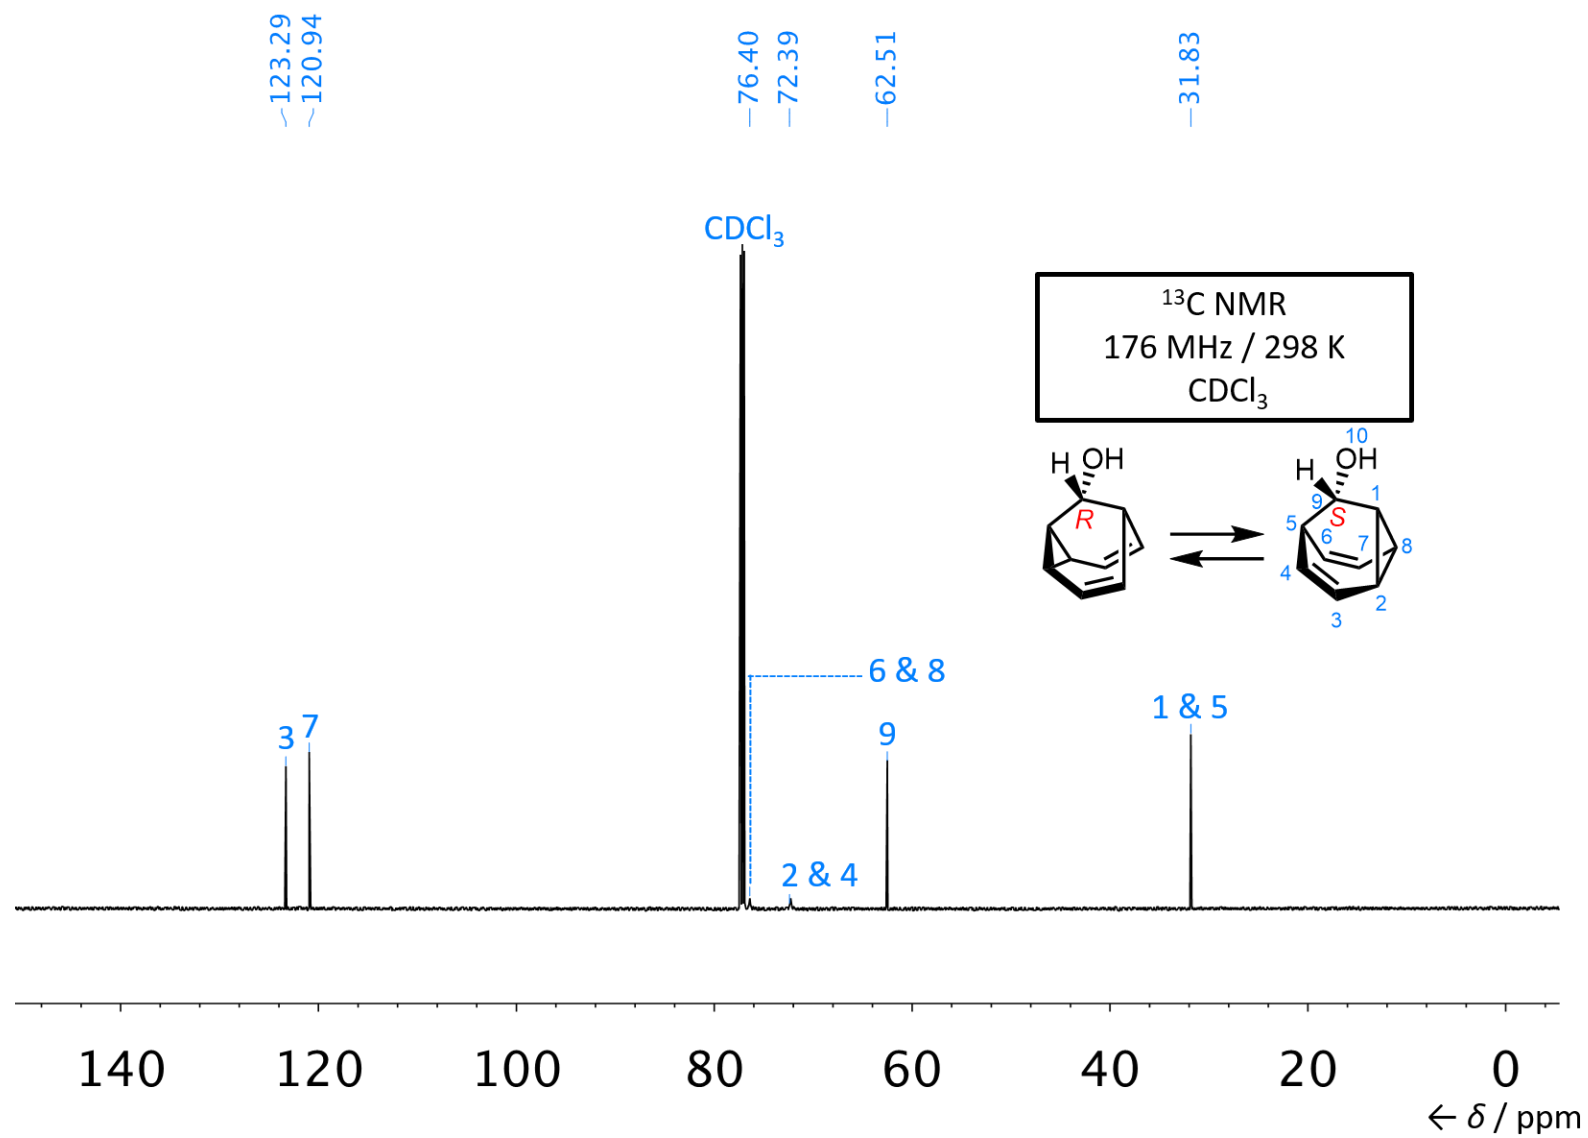

**Figure S7.** <sup>13</sup>C NMR spectrum of (R)/(S)-1.

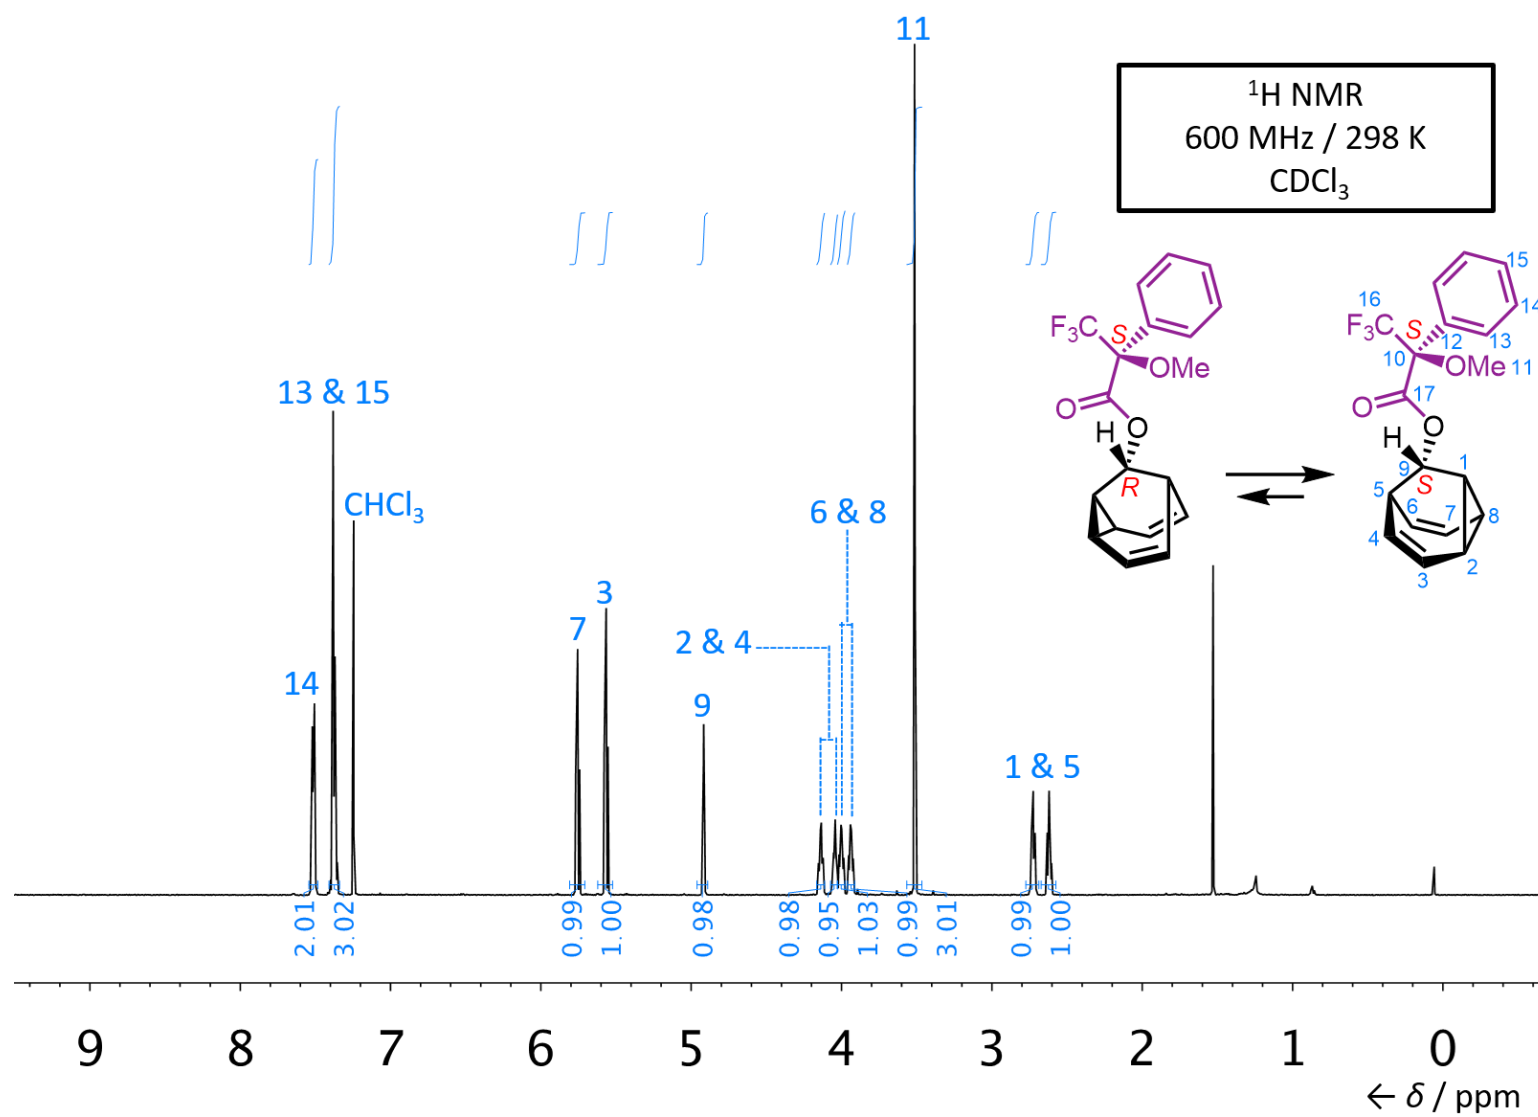

**Figure S8.** <sup>1</sup>H NMR spectrum of (*R,S*)/(*S,S*)-**2**.

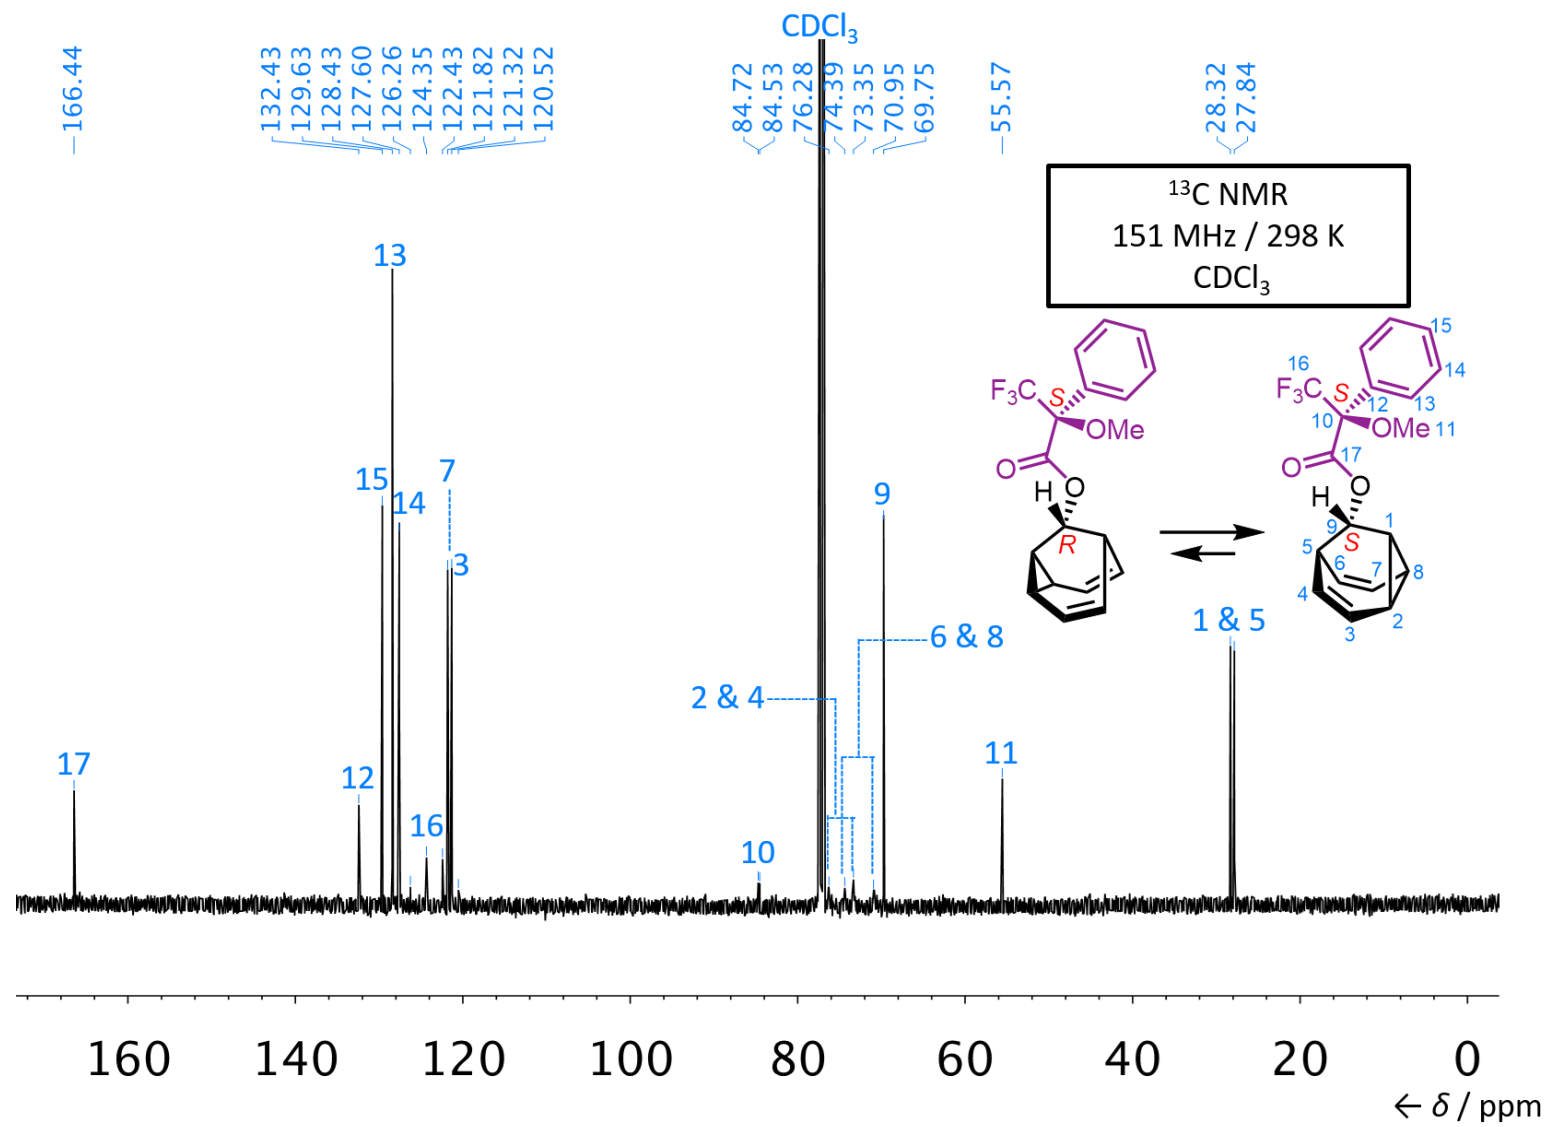

Figure S9. <sup>13</sup>C NMR spectrum of (R,S)/(S,S)-2.

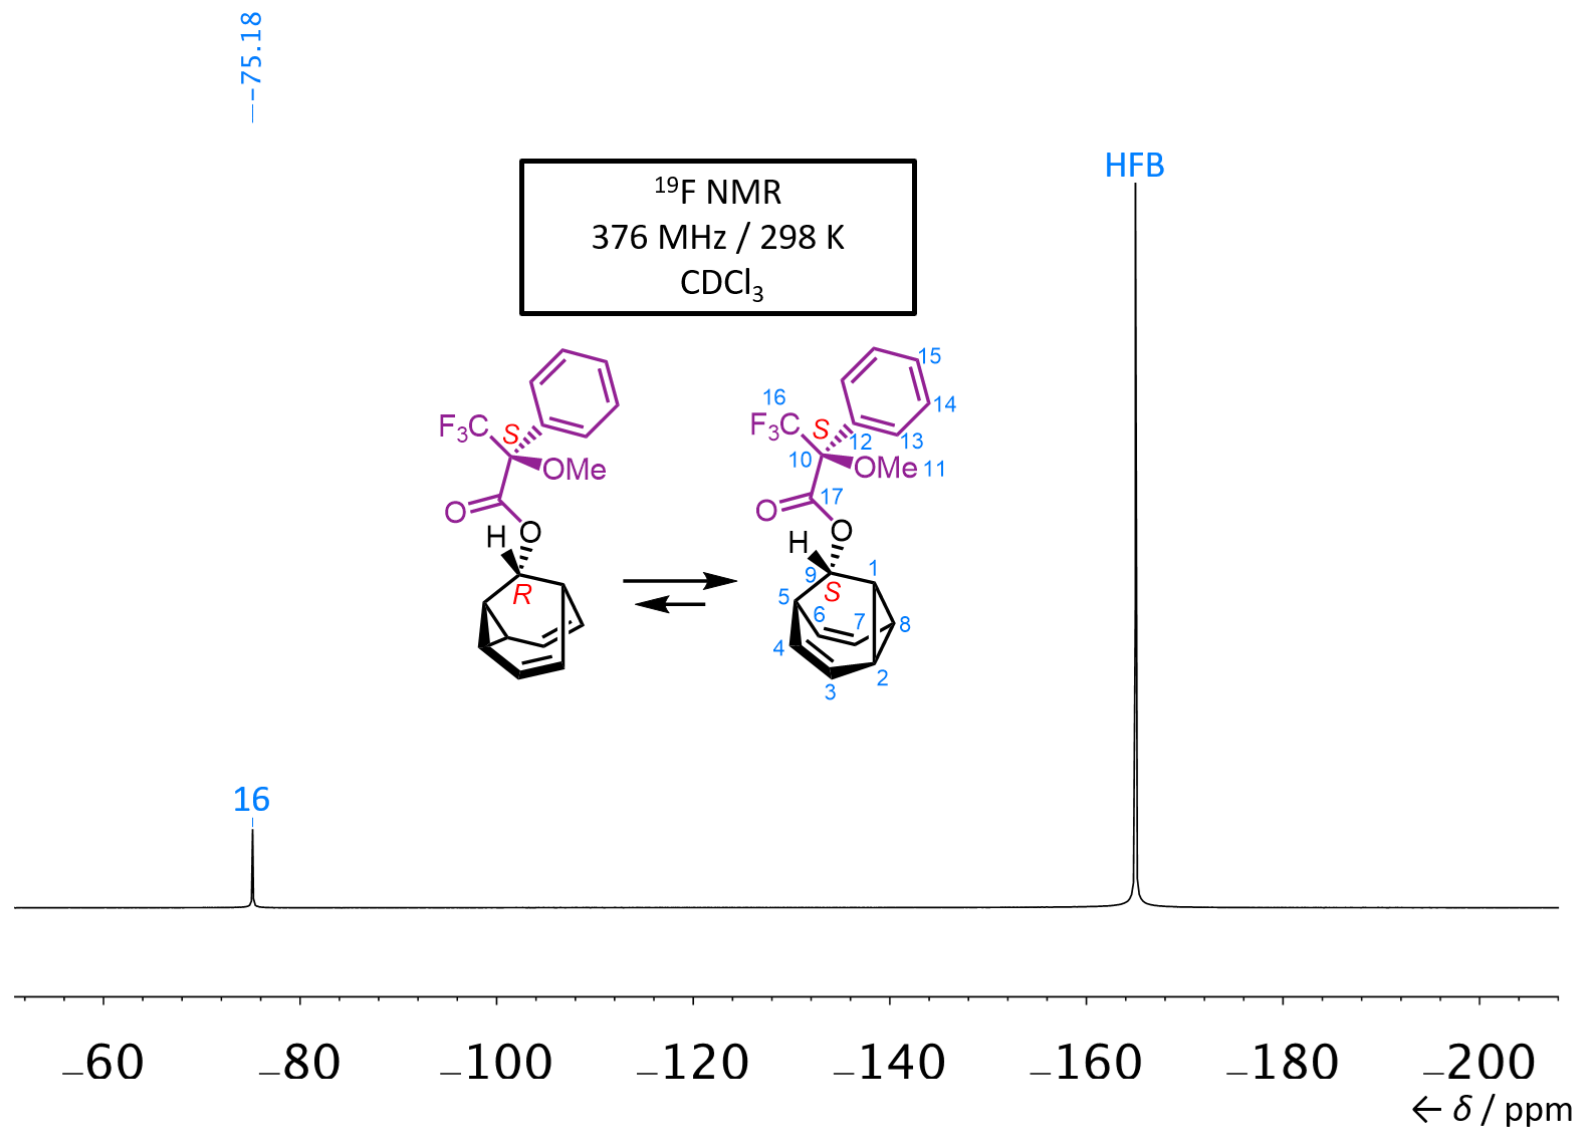

**Figure S10.**  $^{19}\text{F}$  NMR spectrum of  $(R,S)/(S,S)$ -**2**.

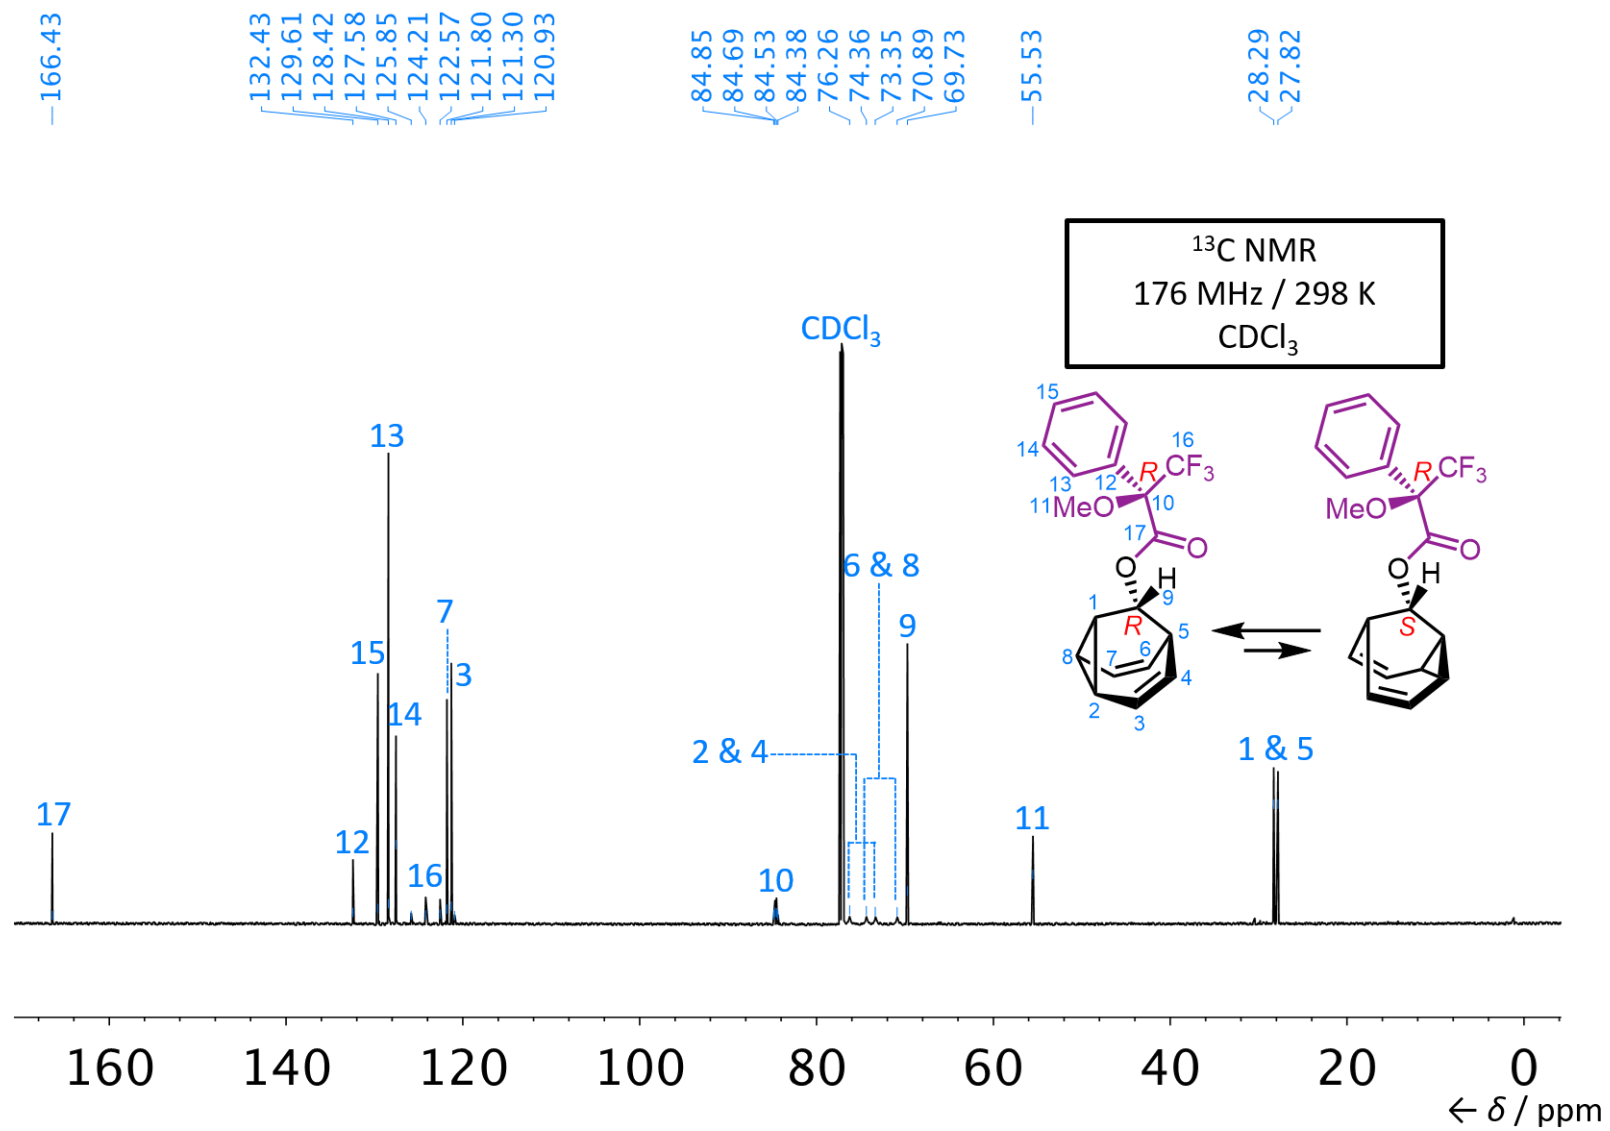

**Figure S11.** <sup>13</sup>C NMR spectrum of (R,R)/(S,R)-2.

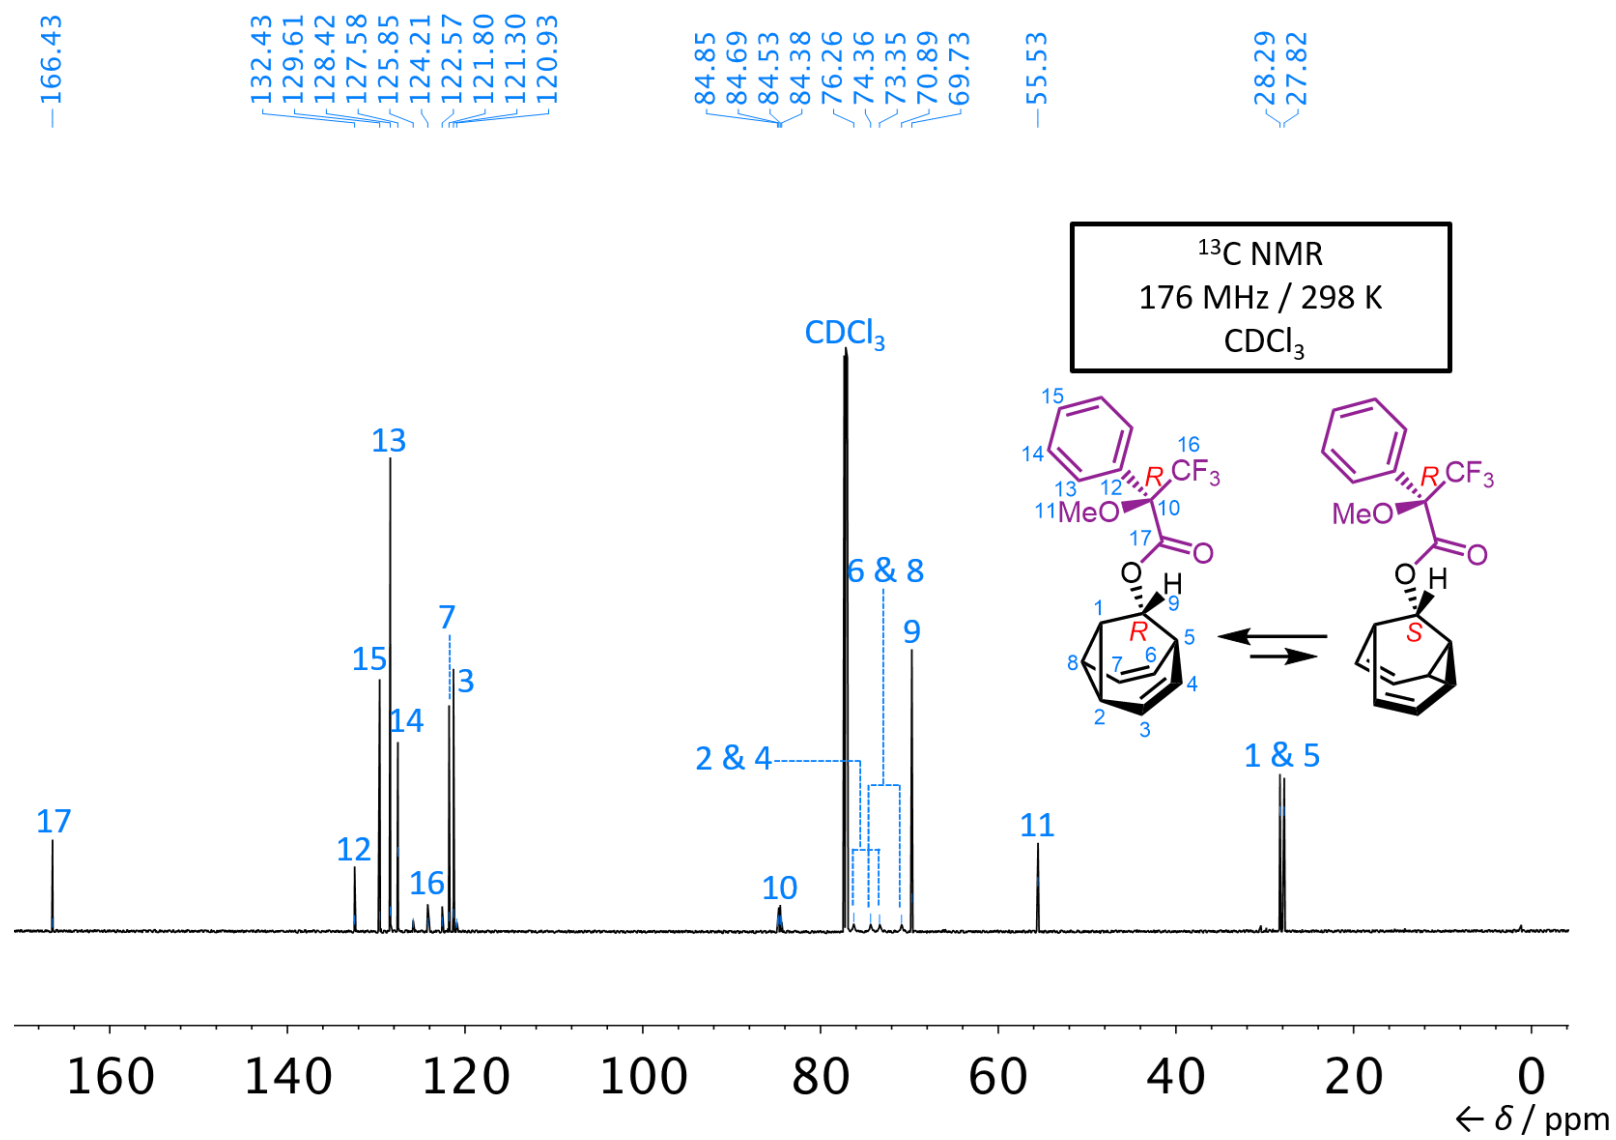

**Figure S12.** <sup>13</sup>C NMR spectrum of *(R,R)*/*(S,R)*-2.



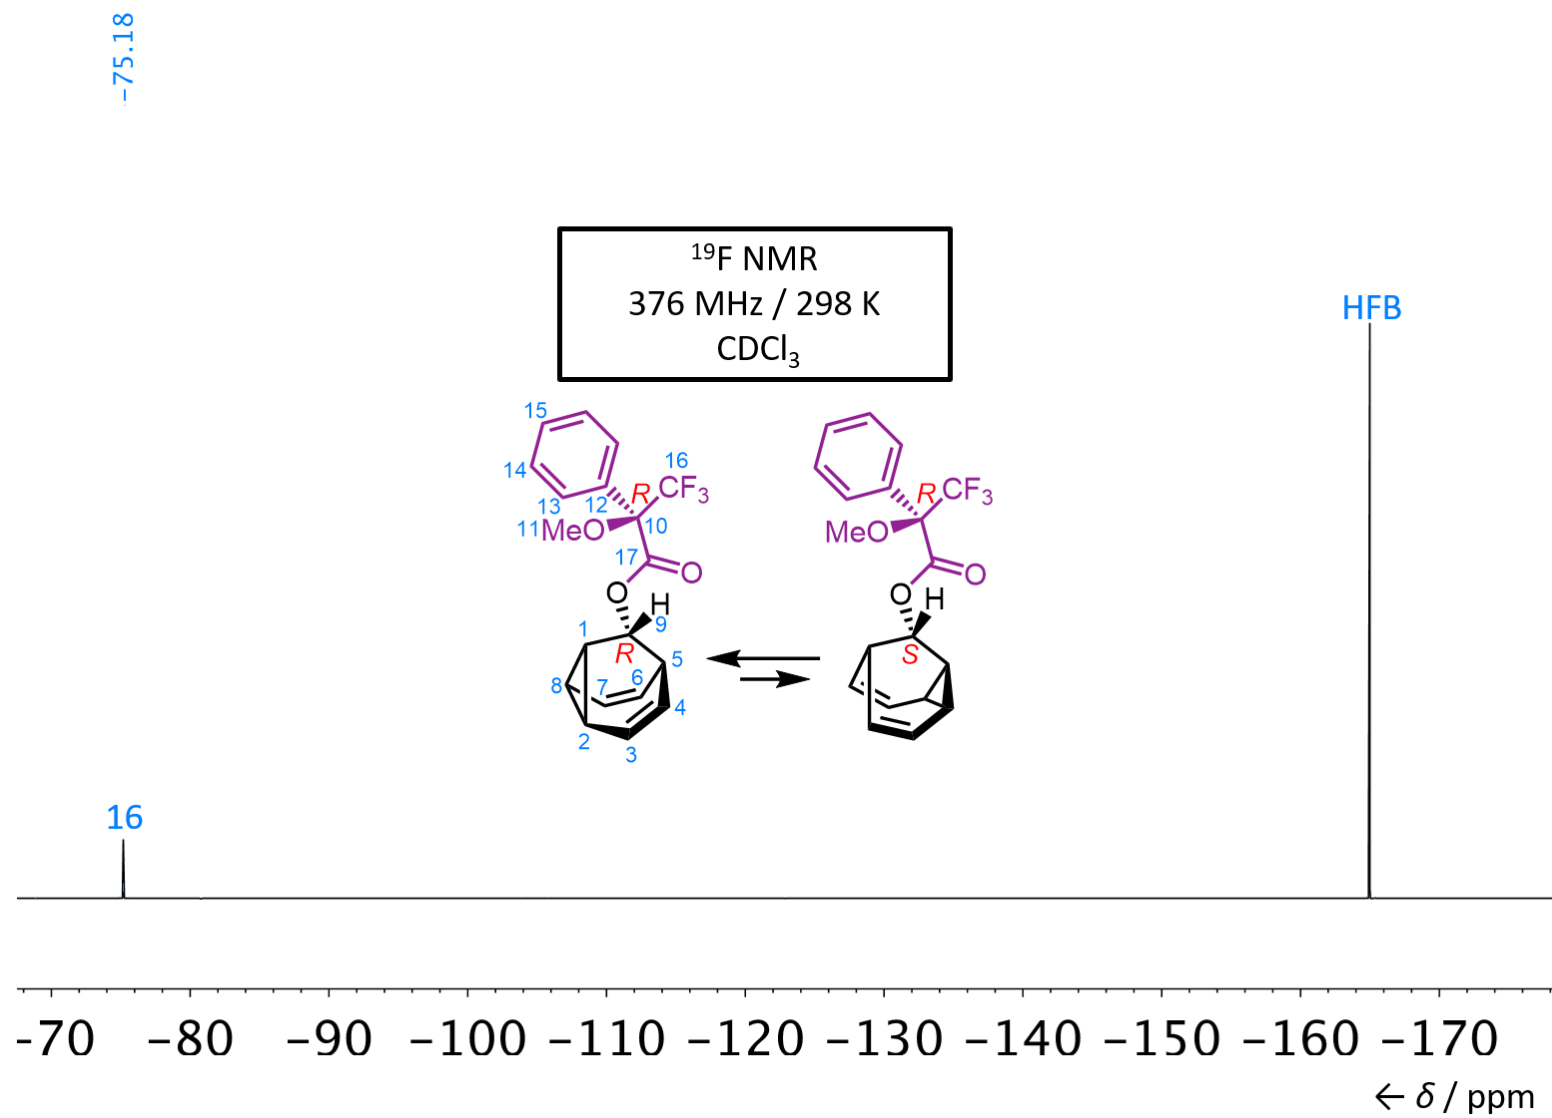

**Figure S13.** <sup>19</sup>F NMR spectrum of (*R,R*)/(*S,R*)-**2**.

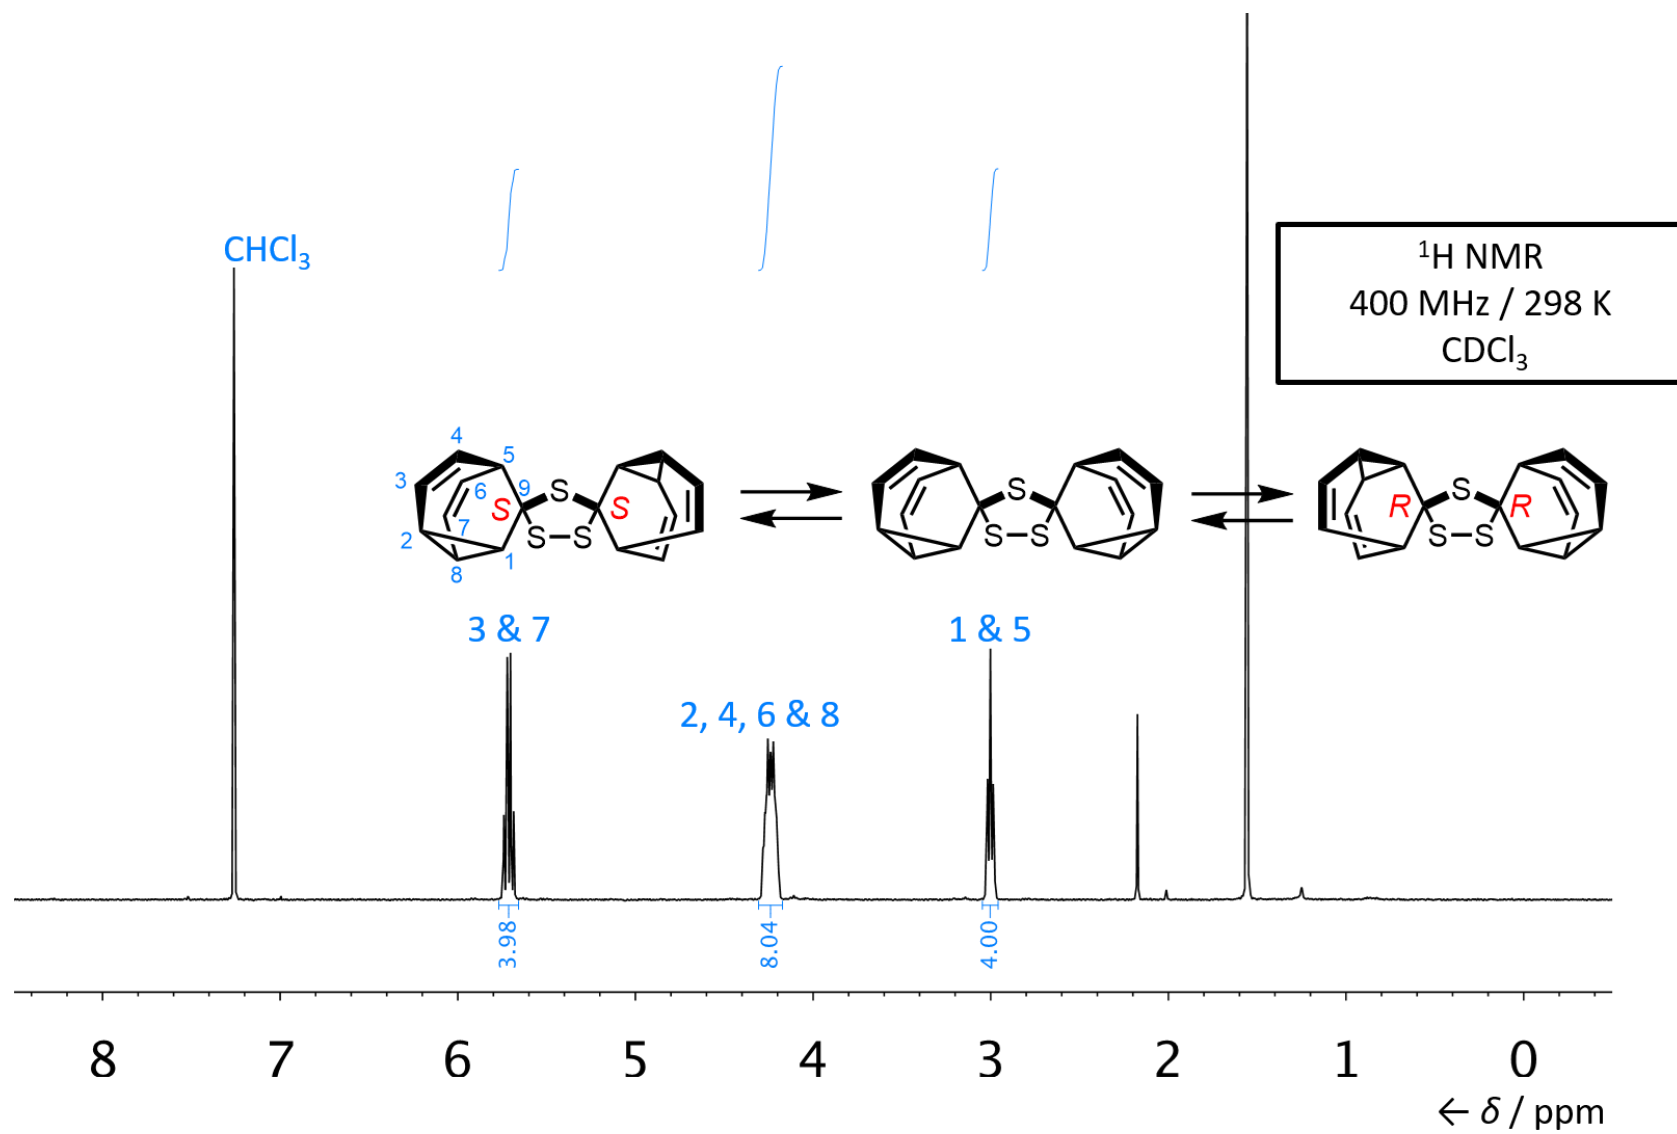

**Figure S14.**  $^1\text{H}$  NMR spectrum of (*R,R*)/*meso*/(*S,S*)-4.

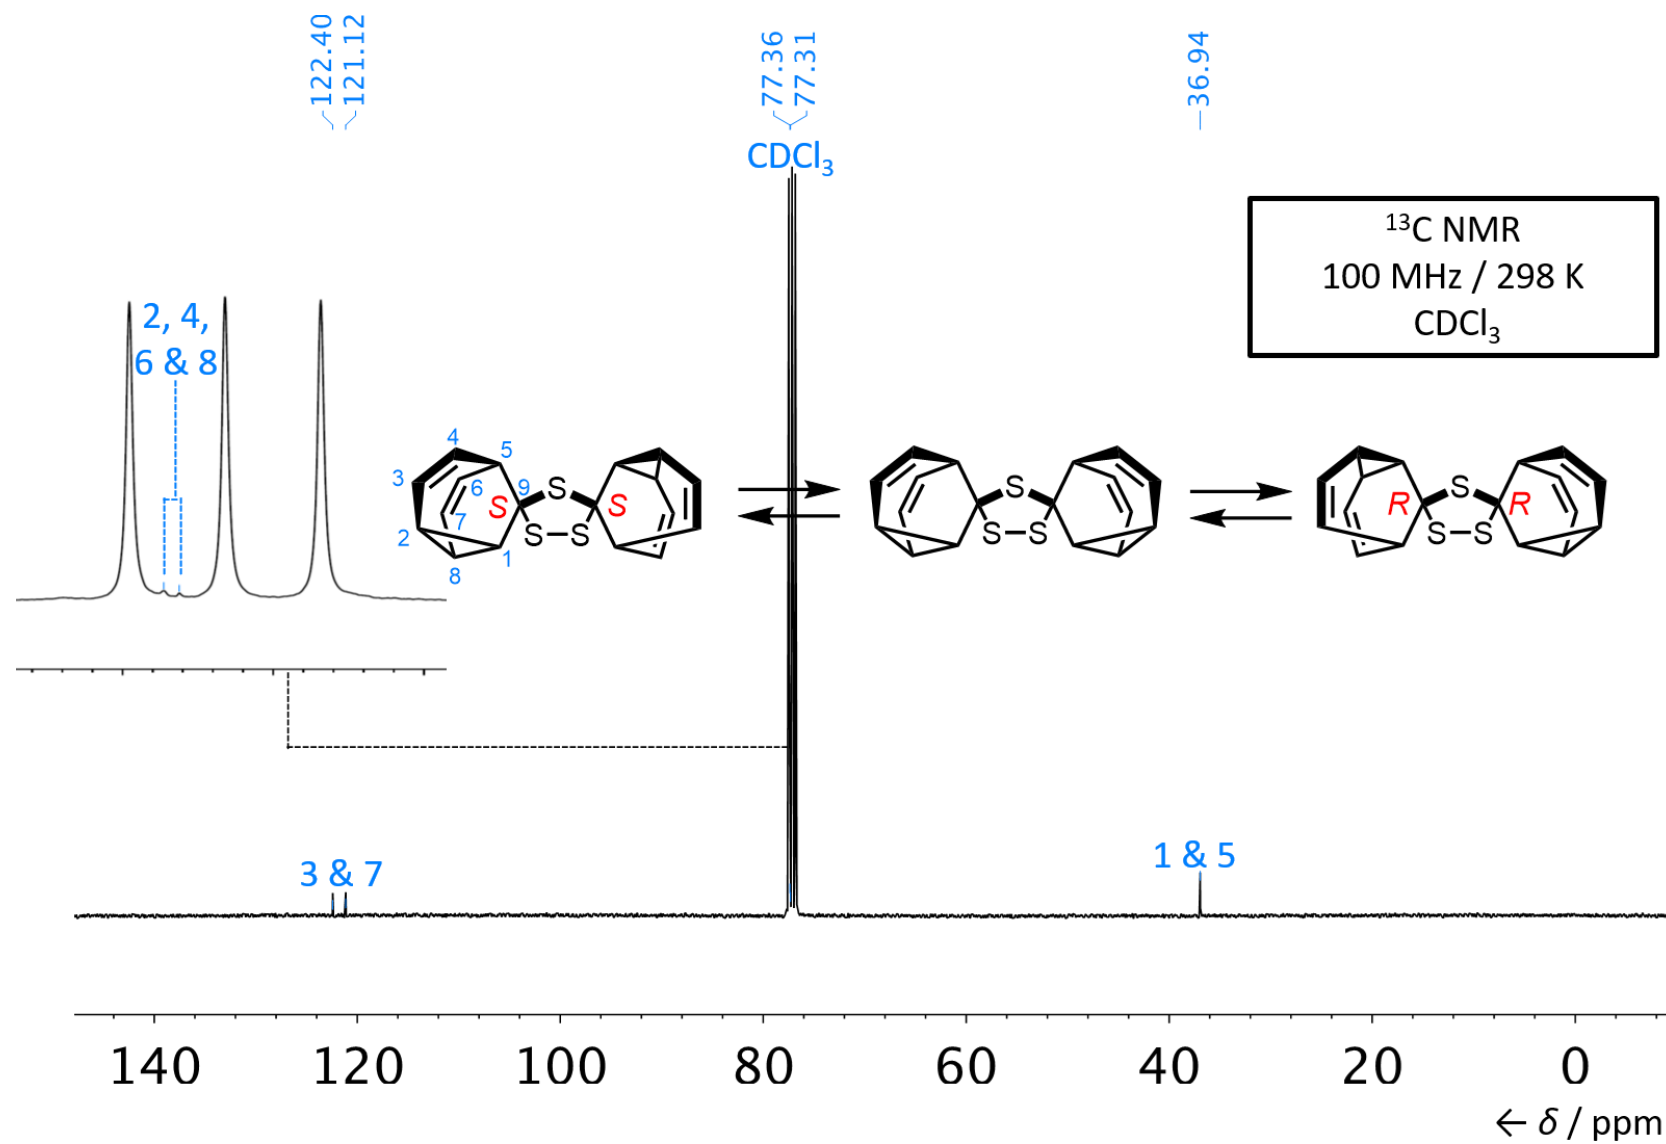

**Figure S15.** <sup>13</sup>C NMR spectrum of (*R,R*)/*meso*/(*S,S*)-4.

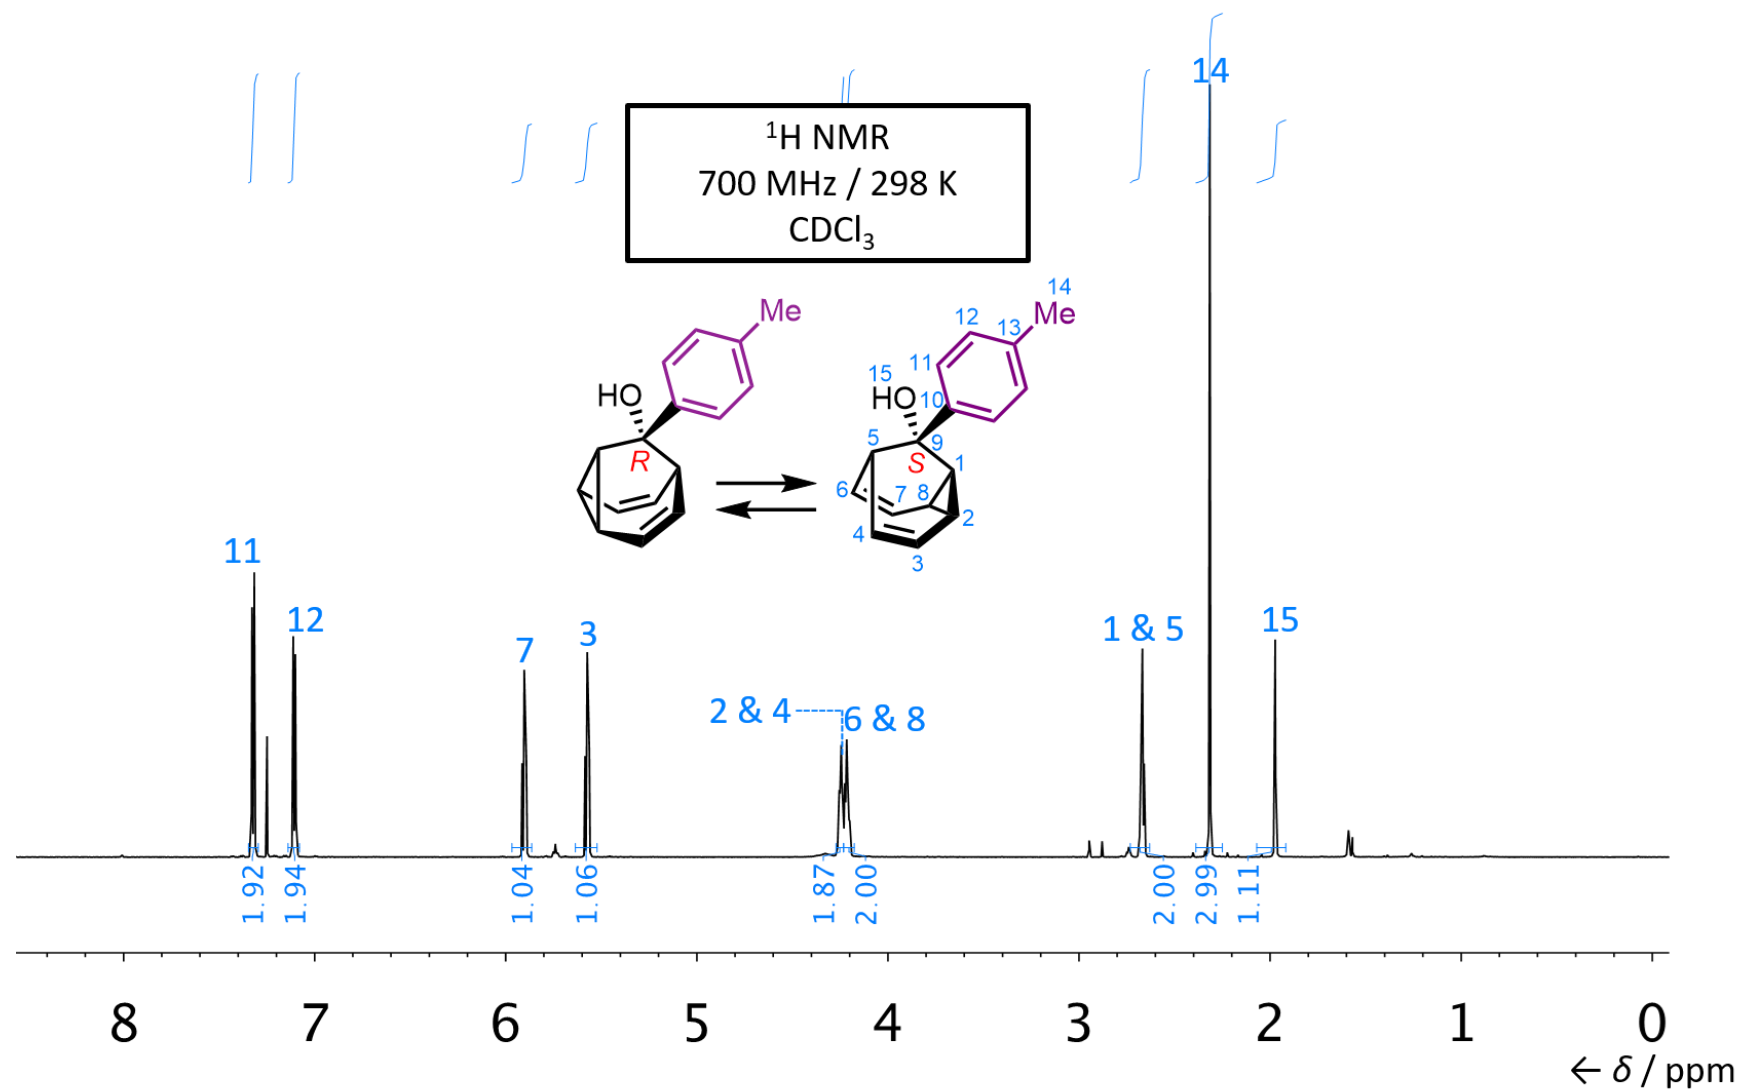

**Figure S16.** <sup>1</sup>H NMR spectrum of (*R*)/(*S*)-6.

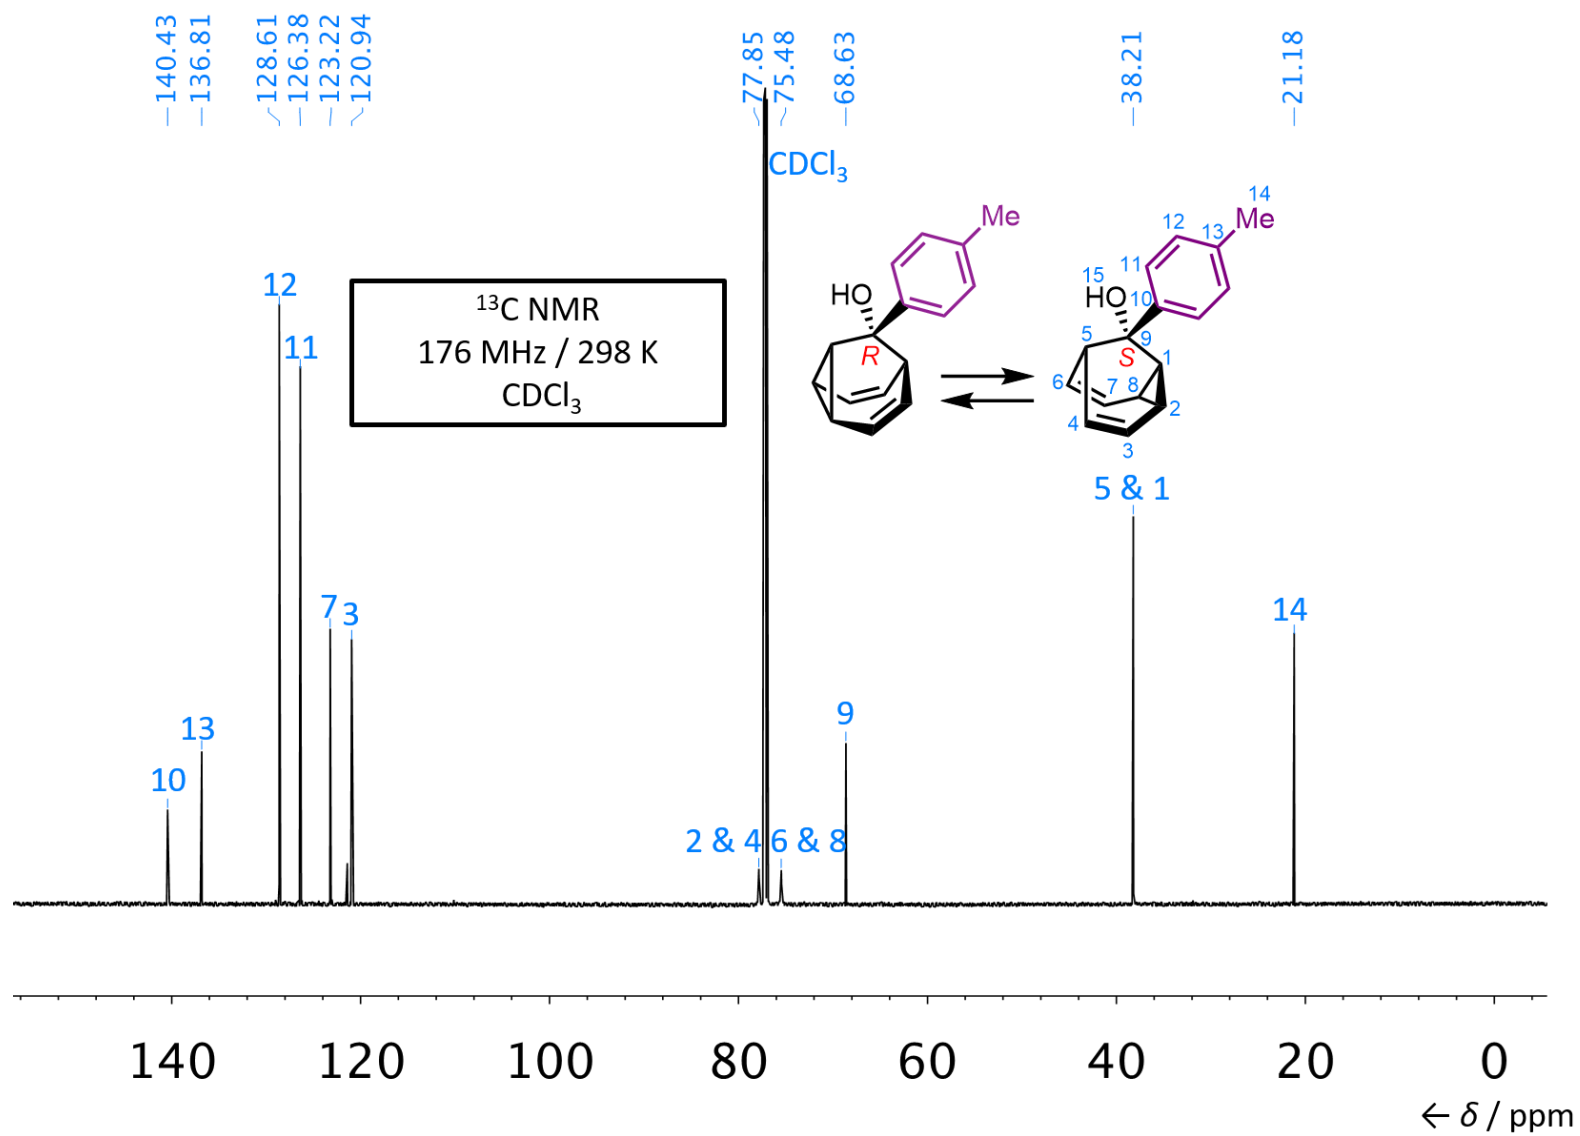

**Figure S17.** <sup>13</sup>C NMR spectrum of (*R*)/(*S*)-6.

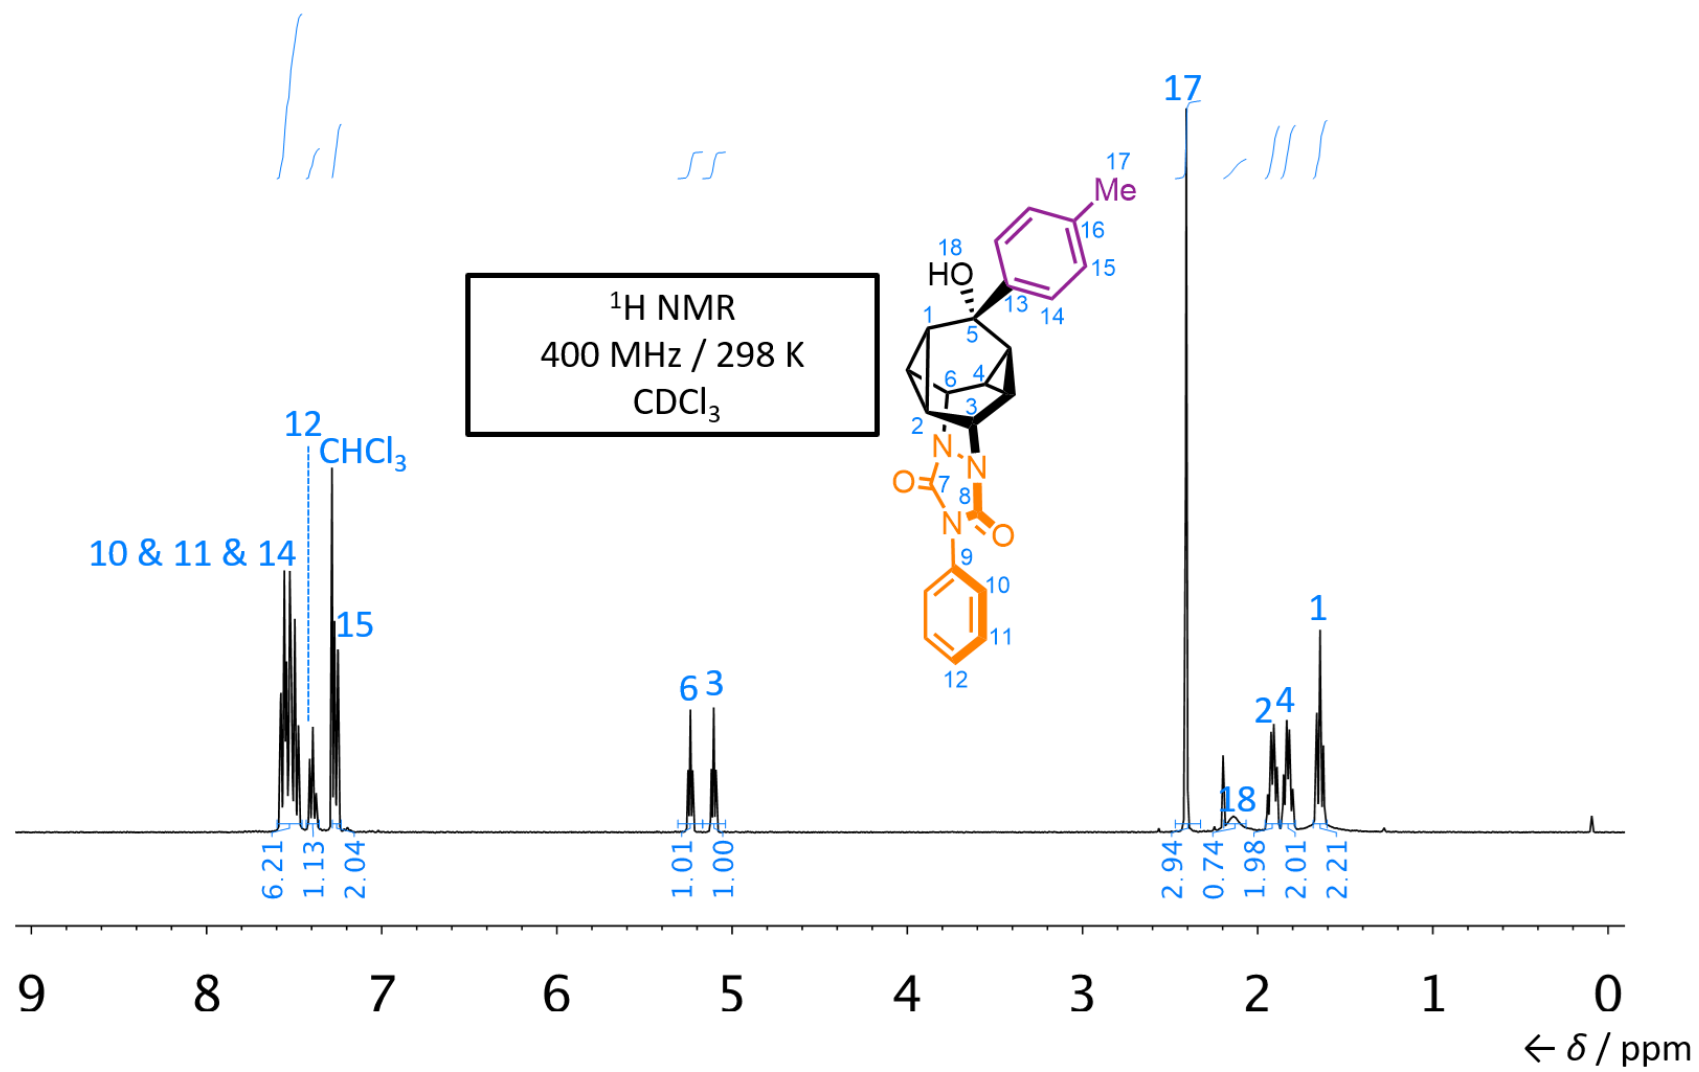

**Figure S18.** <sup>1</sup>H NMR spectrum of 7.

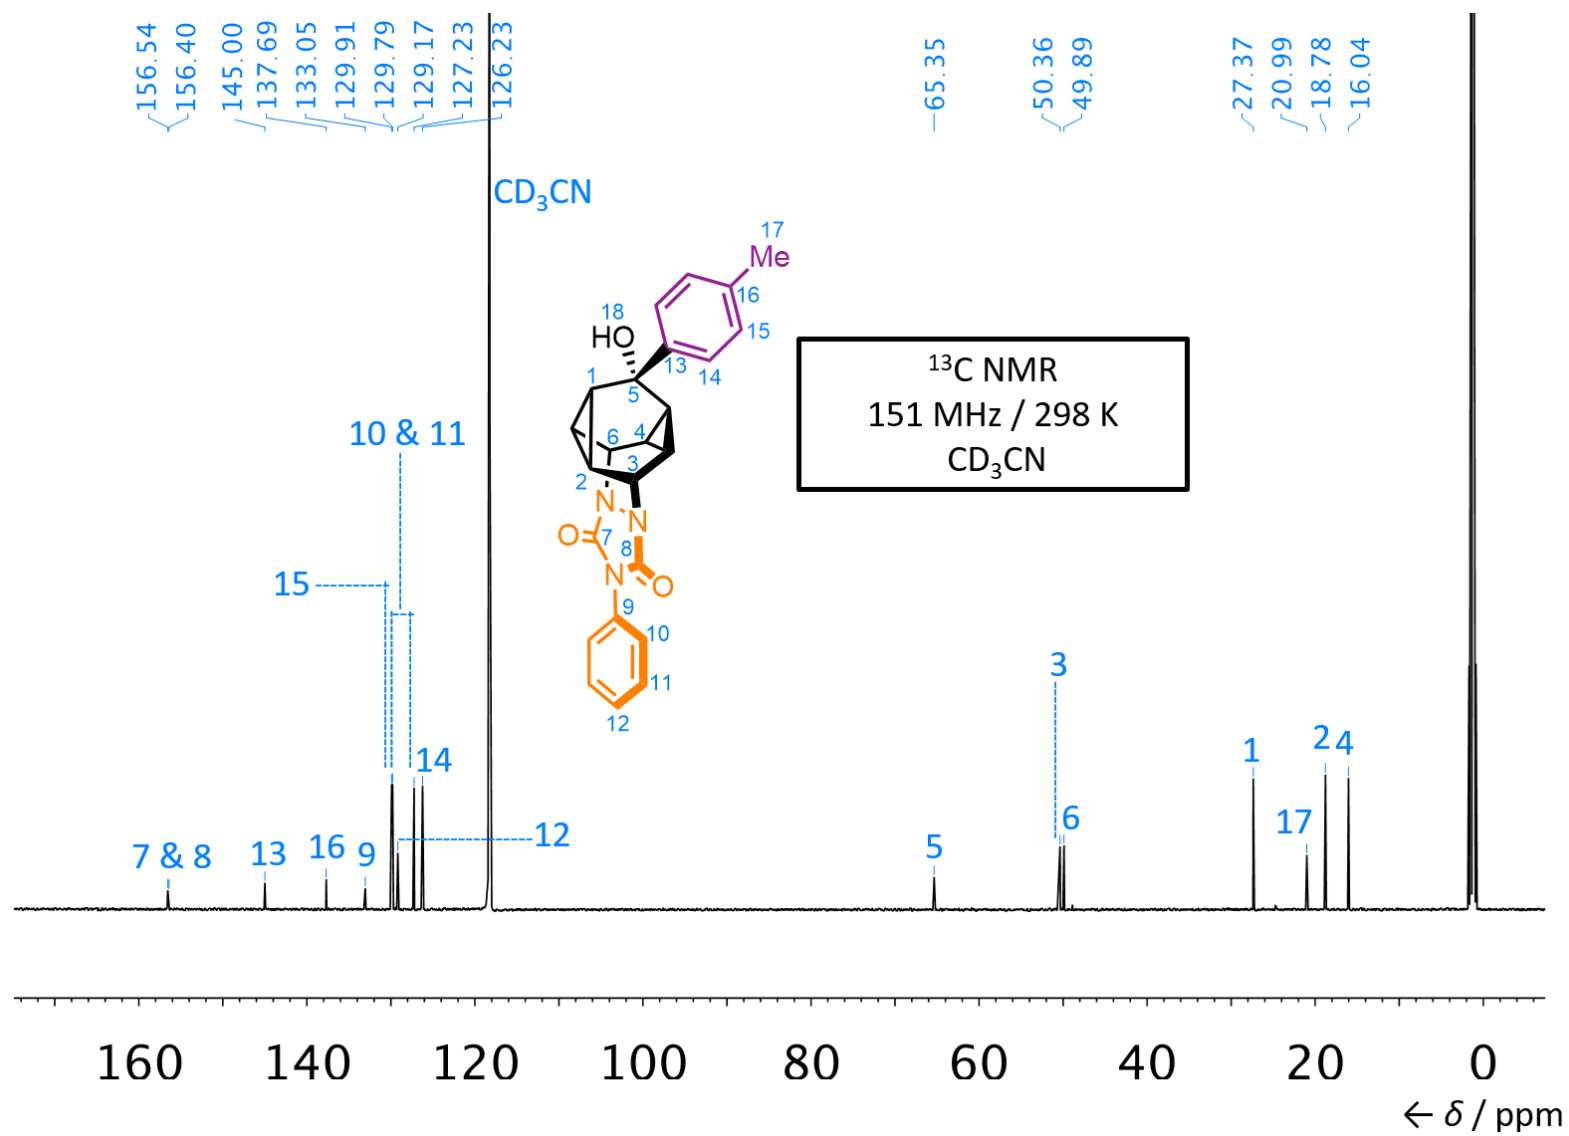

**Figure S19.** <sup>13</sup>C NMR spectrum of **7**.

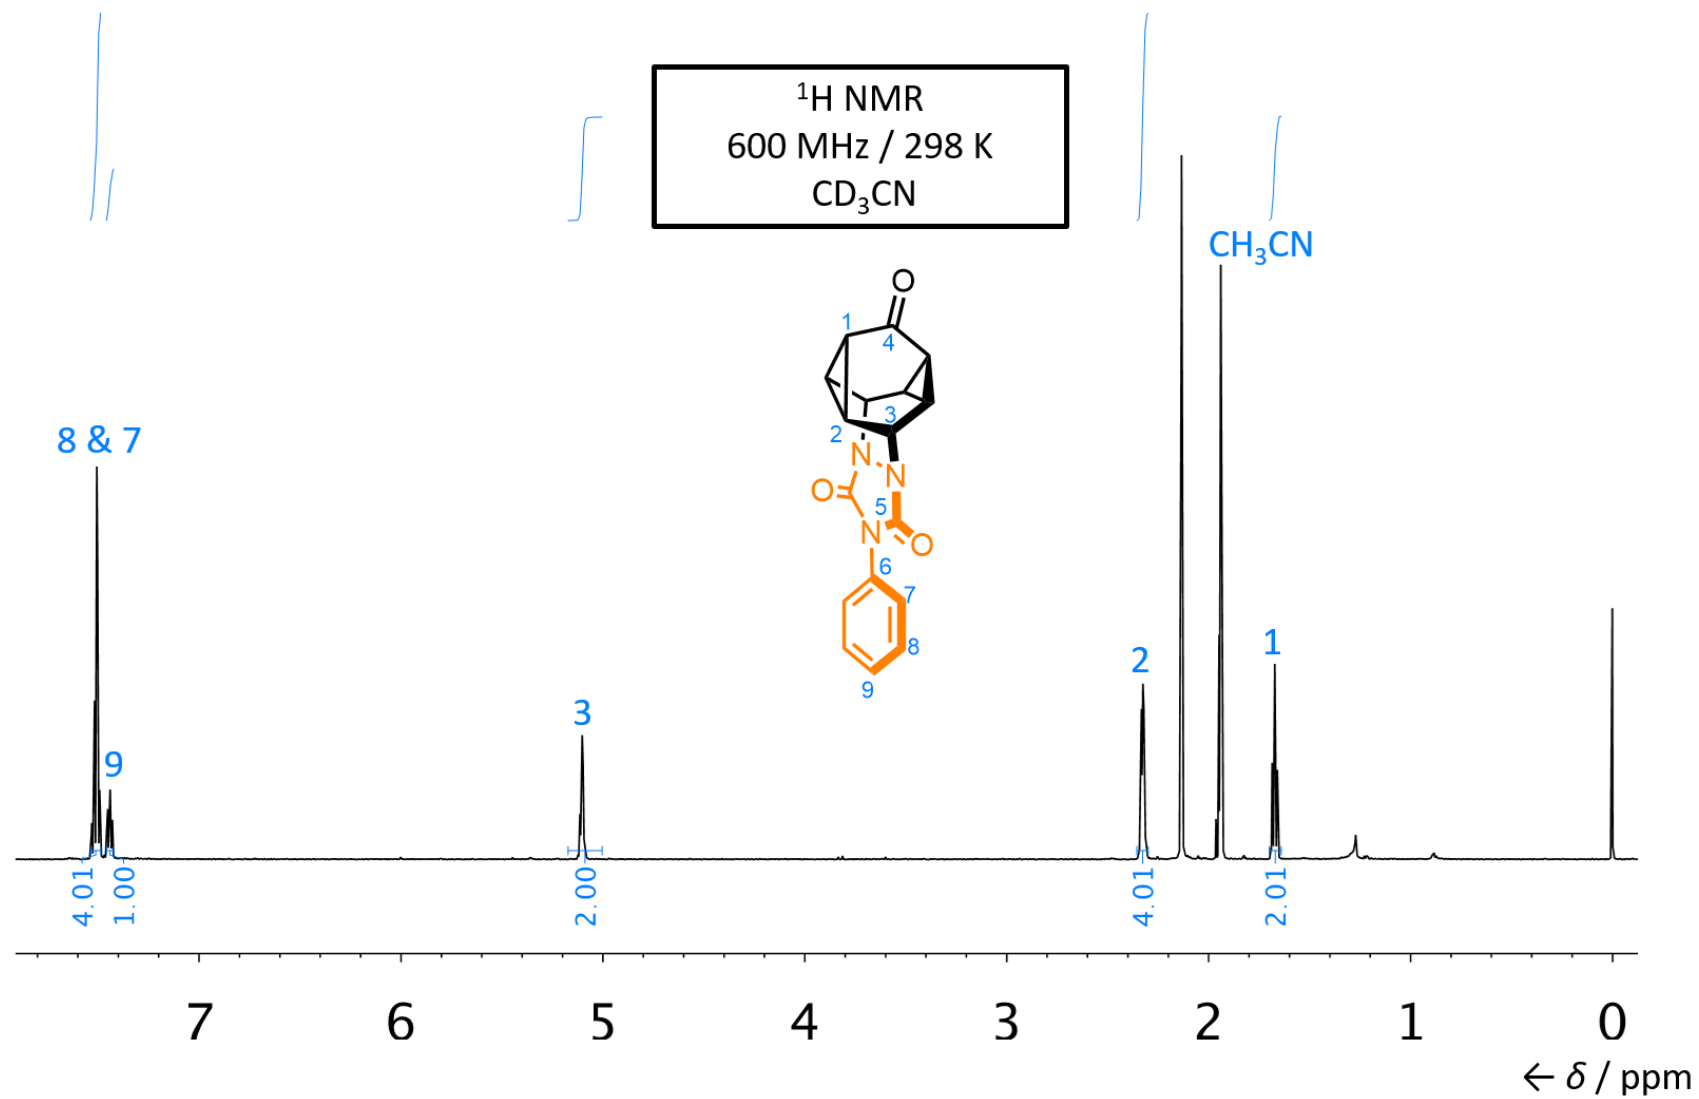

Figure S20. <sup>1</sup>H NMR spectrum of S2.



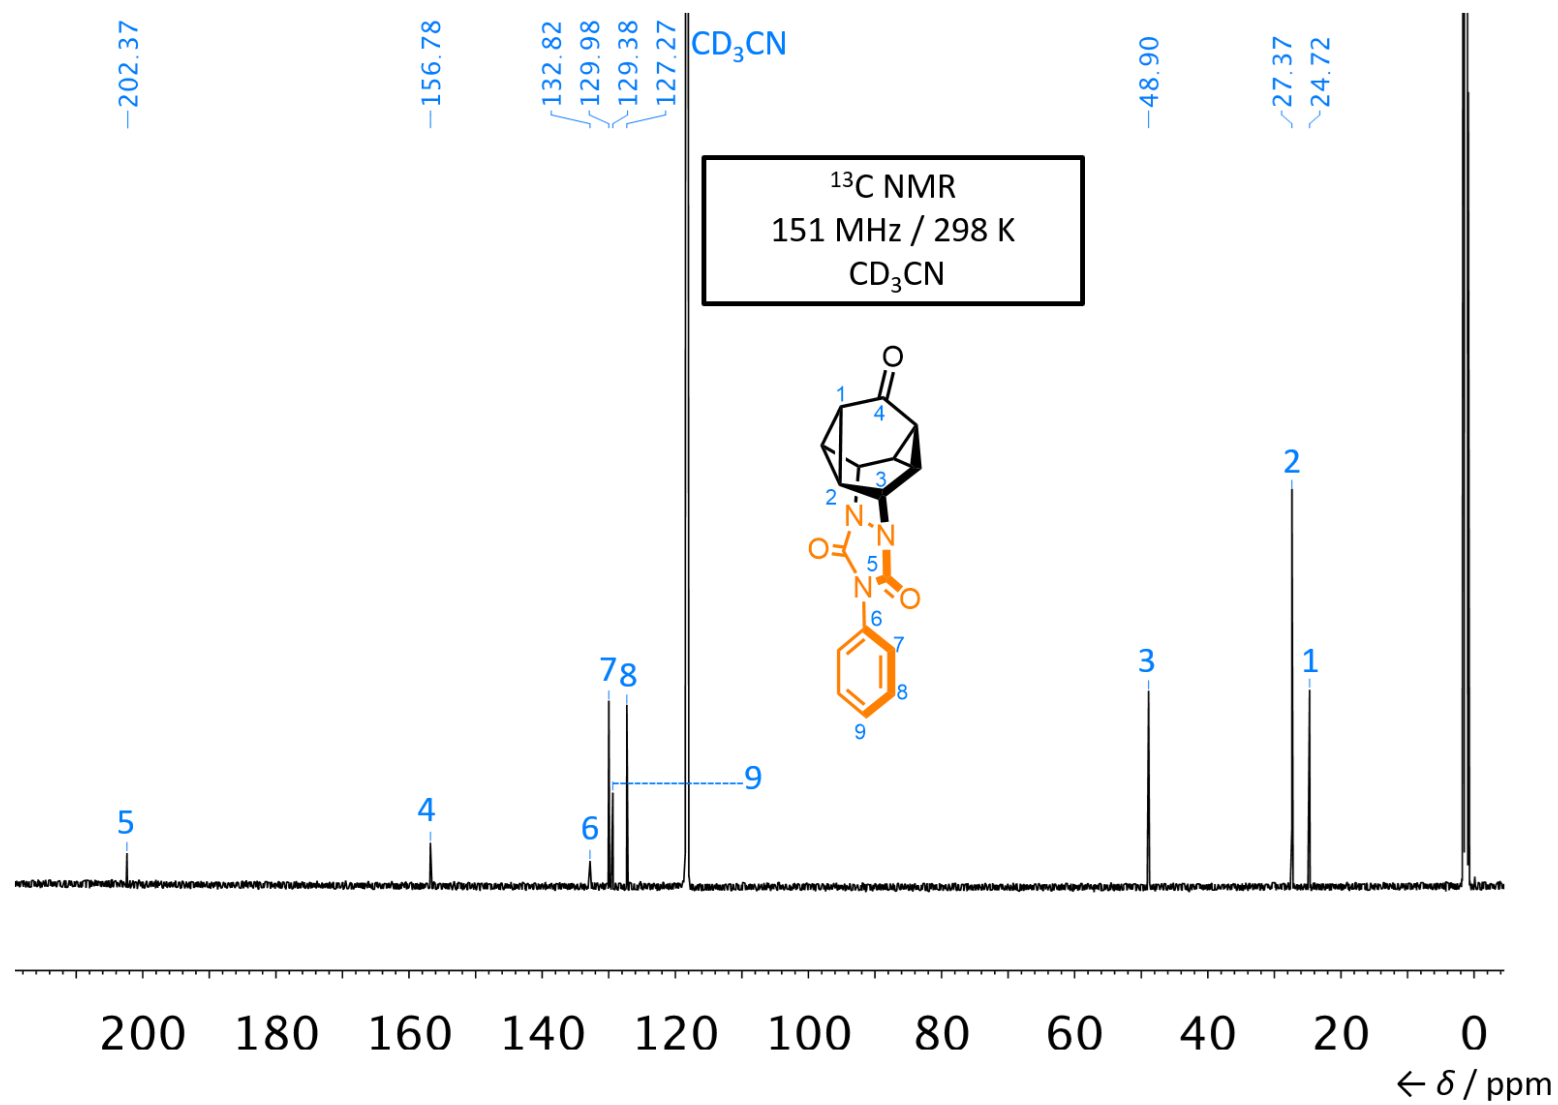

**Figure S21.**  $^{13}\text{C}$  NMR spectrum of **S2**.

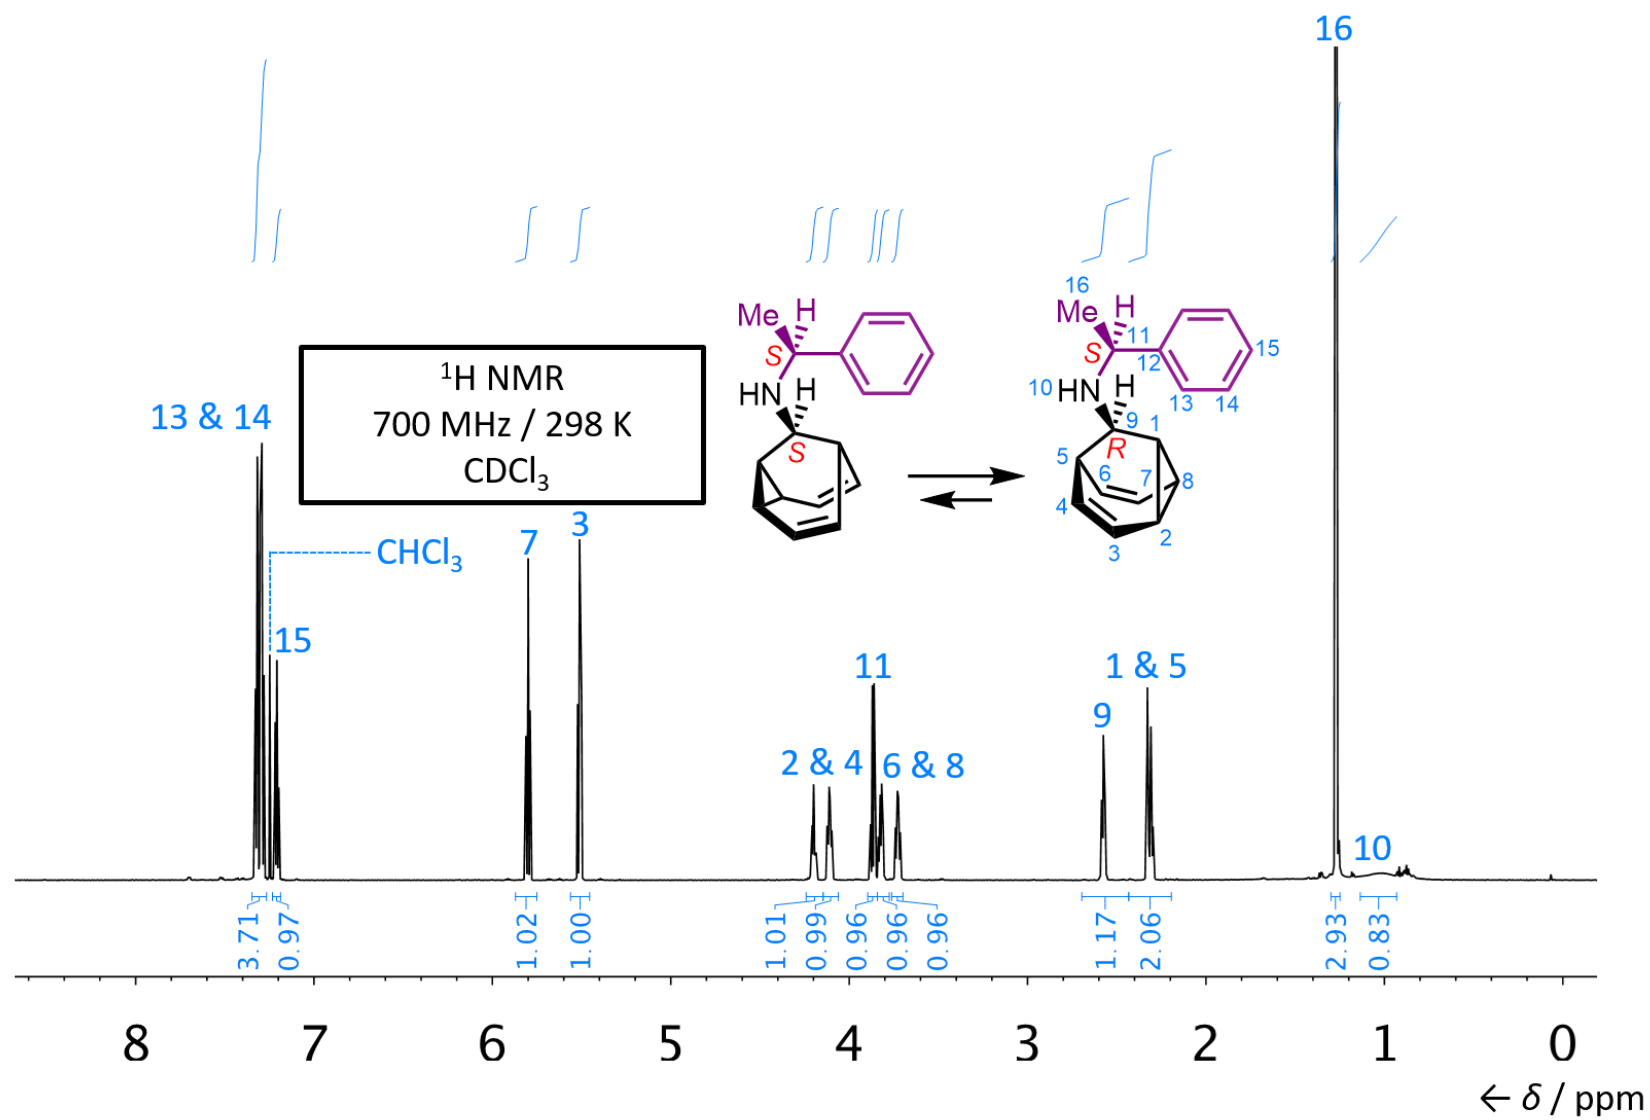

**Figure S22.**  $^1\text{H}$  NMR spectrum of  $(S,S)/(R,S)$ -5.

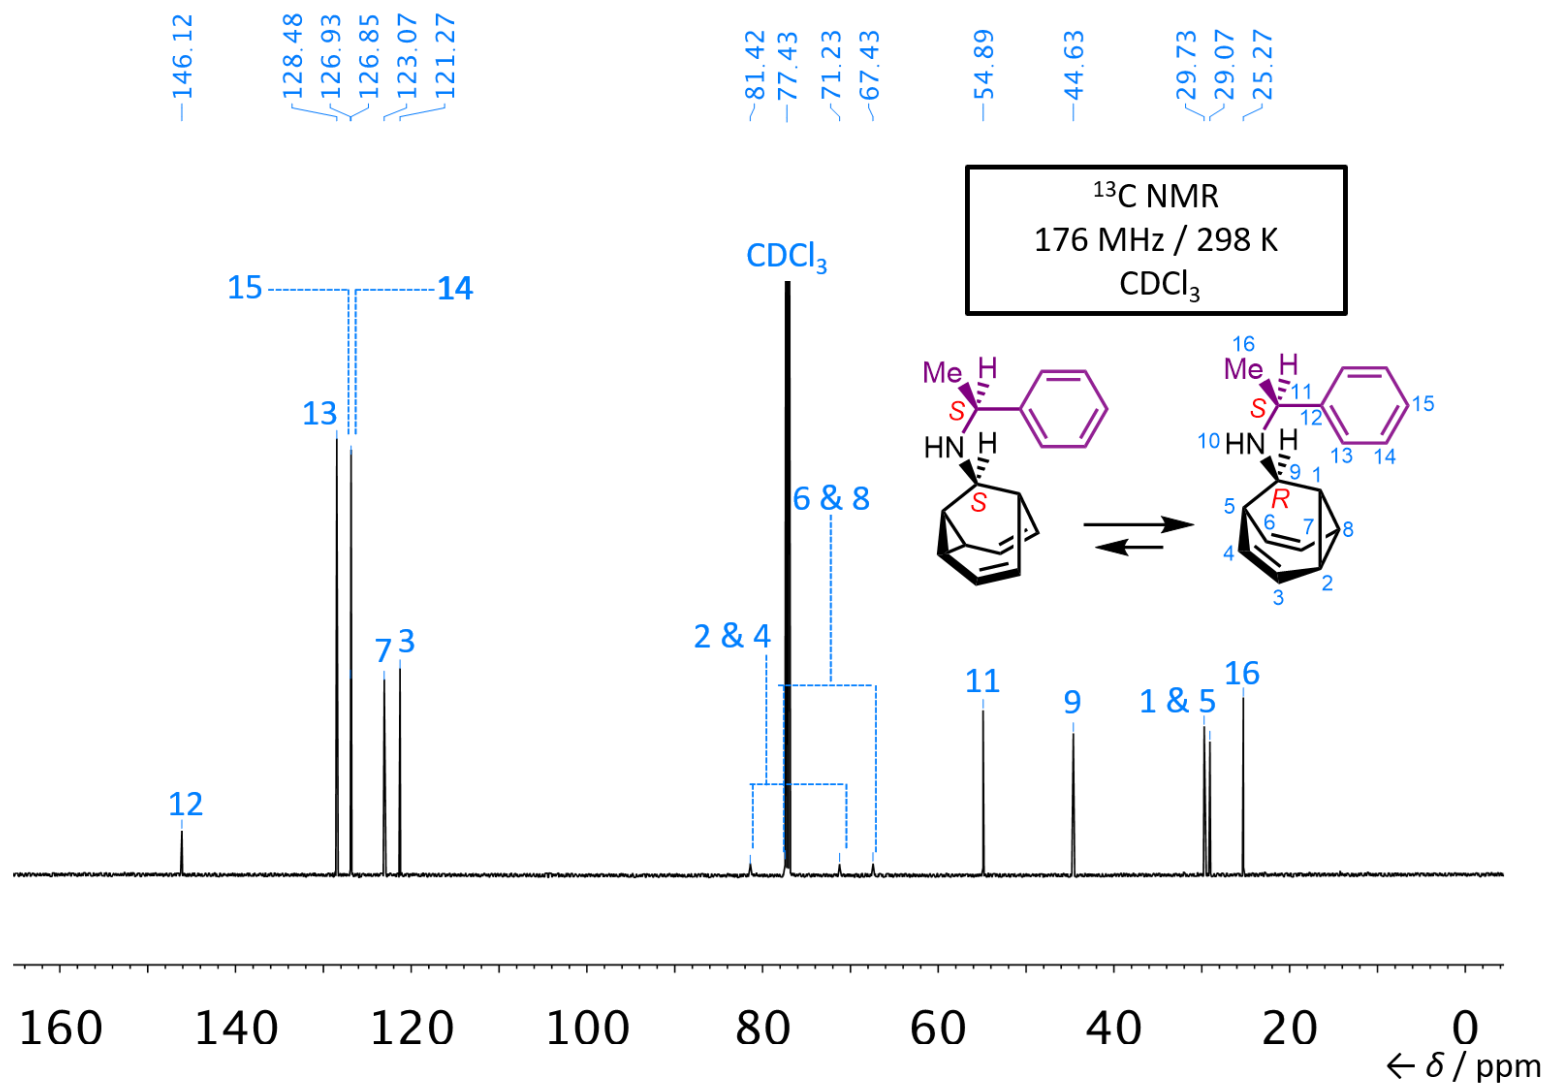

**Figure S23.** <sup>13</sup>C NMR spectrum of (*S,S*)/(*R,S*)-5.

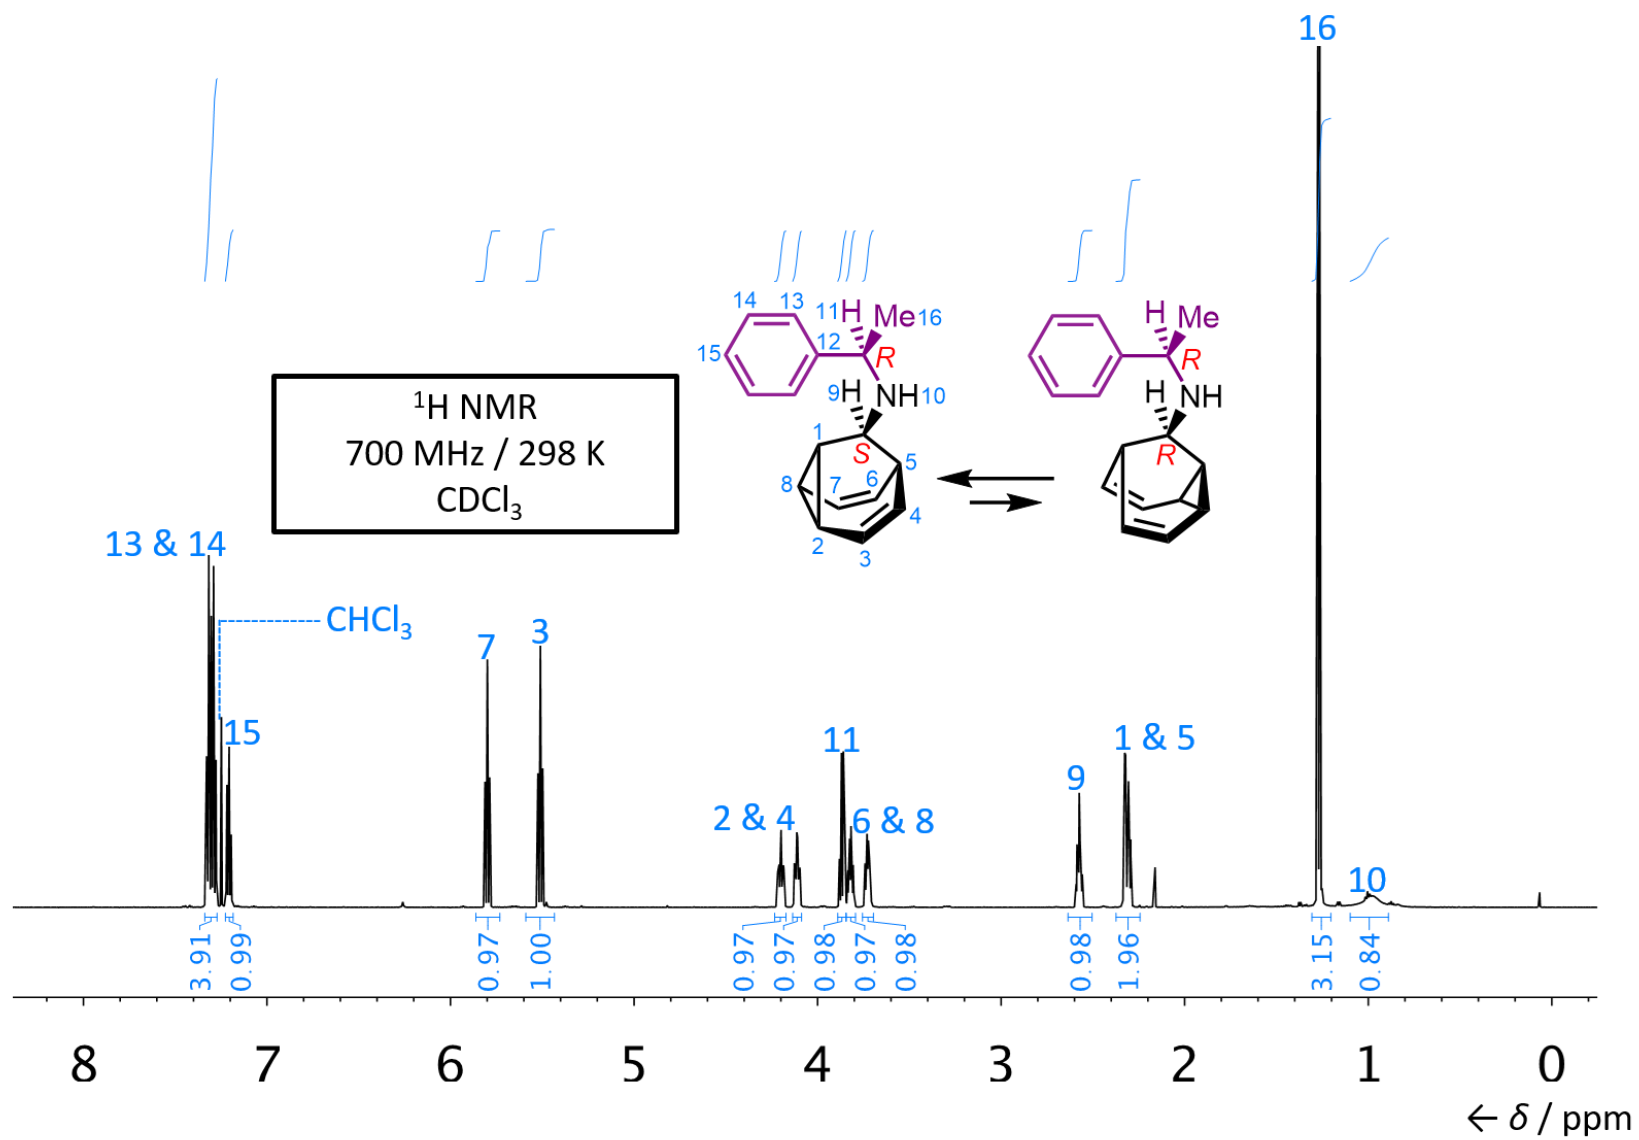

**Figure S24.** <sup>1</sup>H NMR spectrum of (R,S)/(R,R)-5.

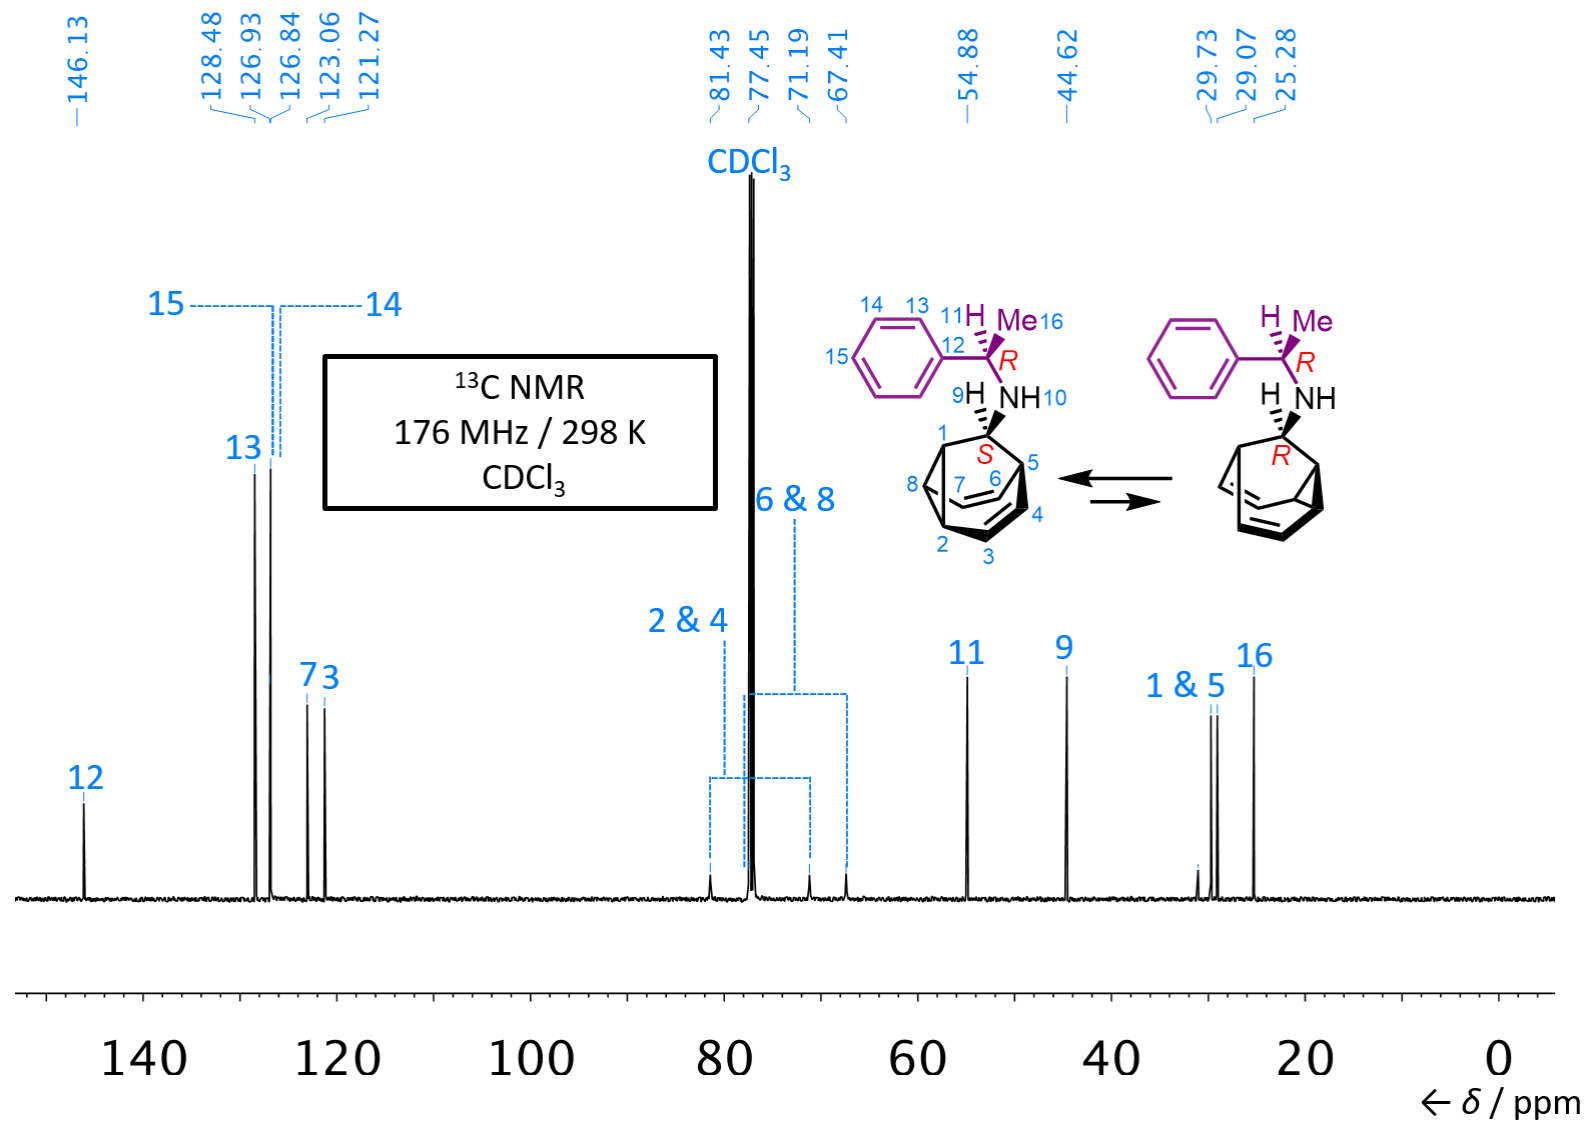

**Figure S25.**  $^{13}\text{C}$  NMR spectrum of  $(R,S)/(R,R)$ -5.

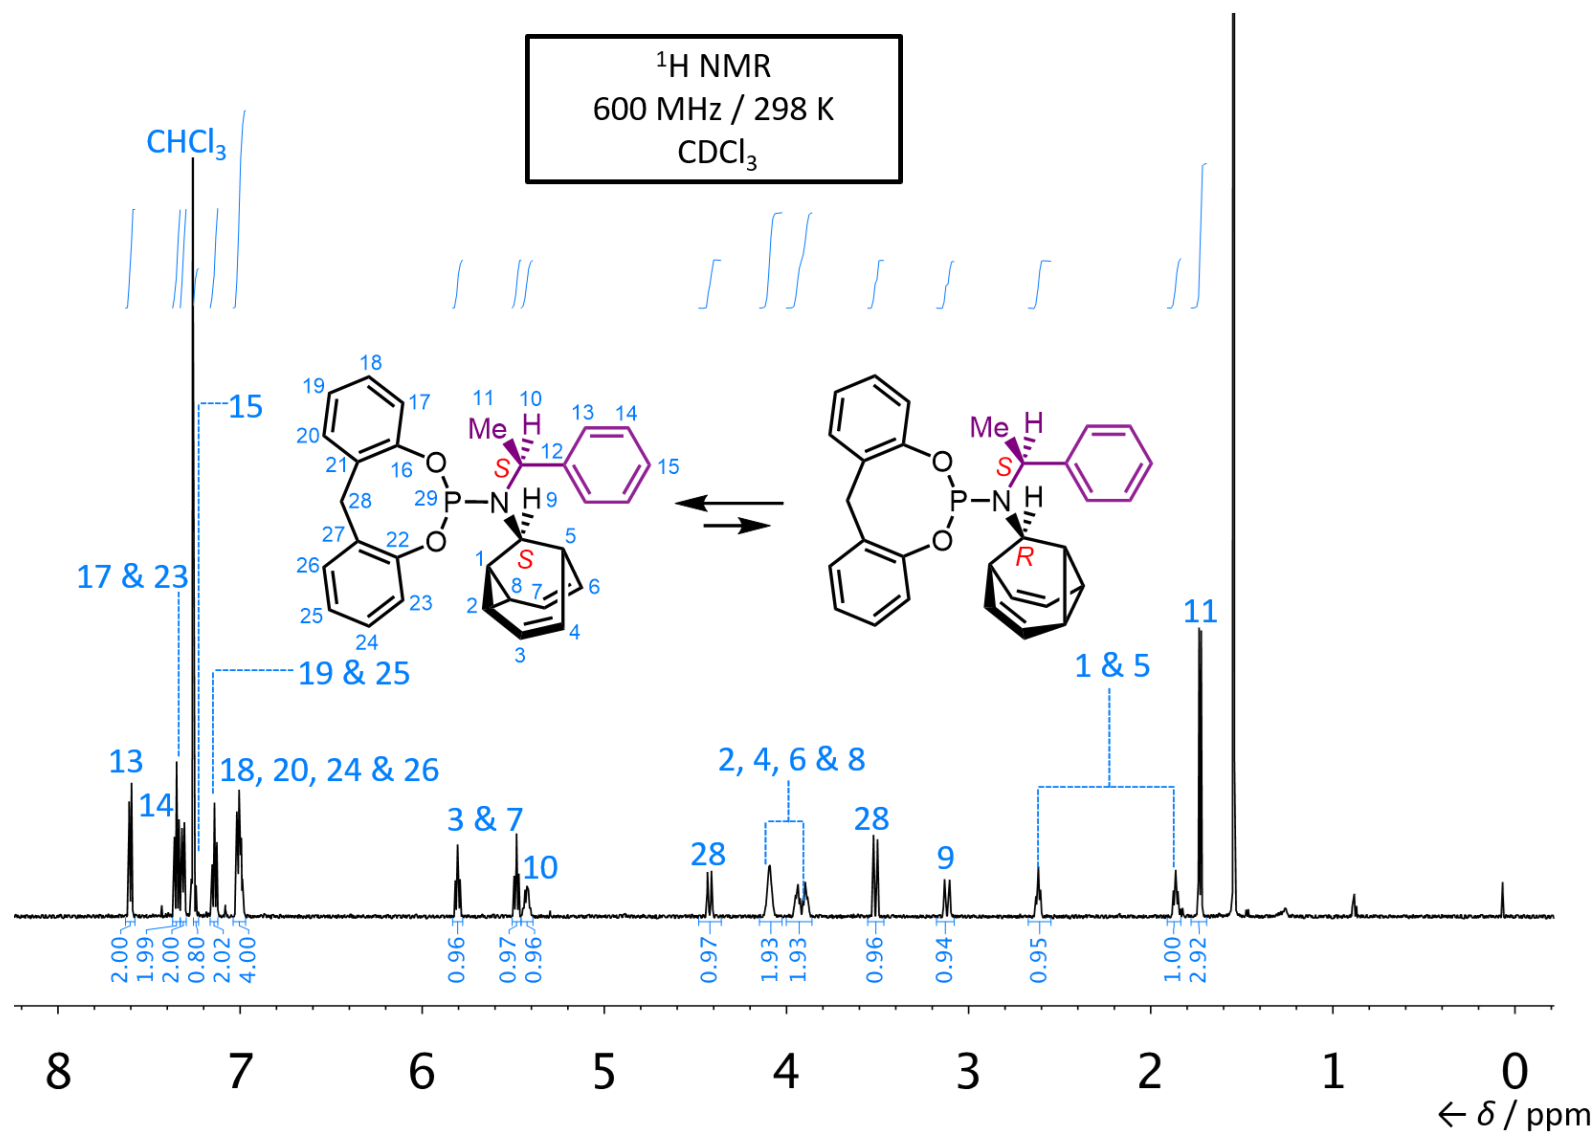

**Figure S26.**  $^1\text{H}$  NMR spectrum of  $(R,S)/(S,S)$ - $\text{L}_{\text{BB}}$ .

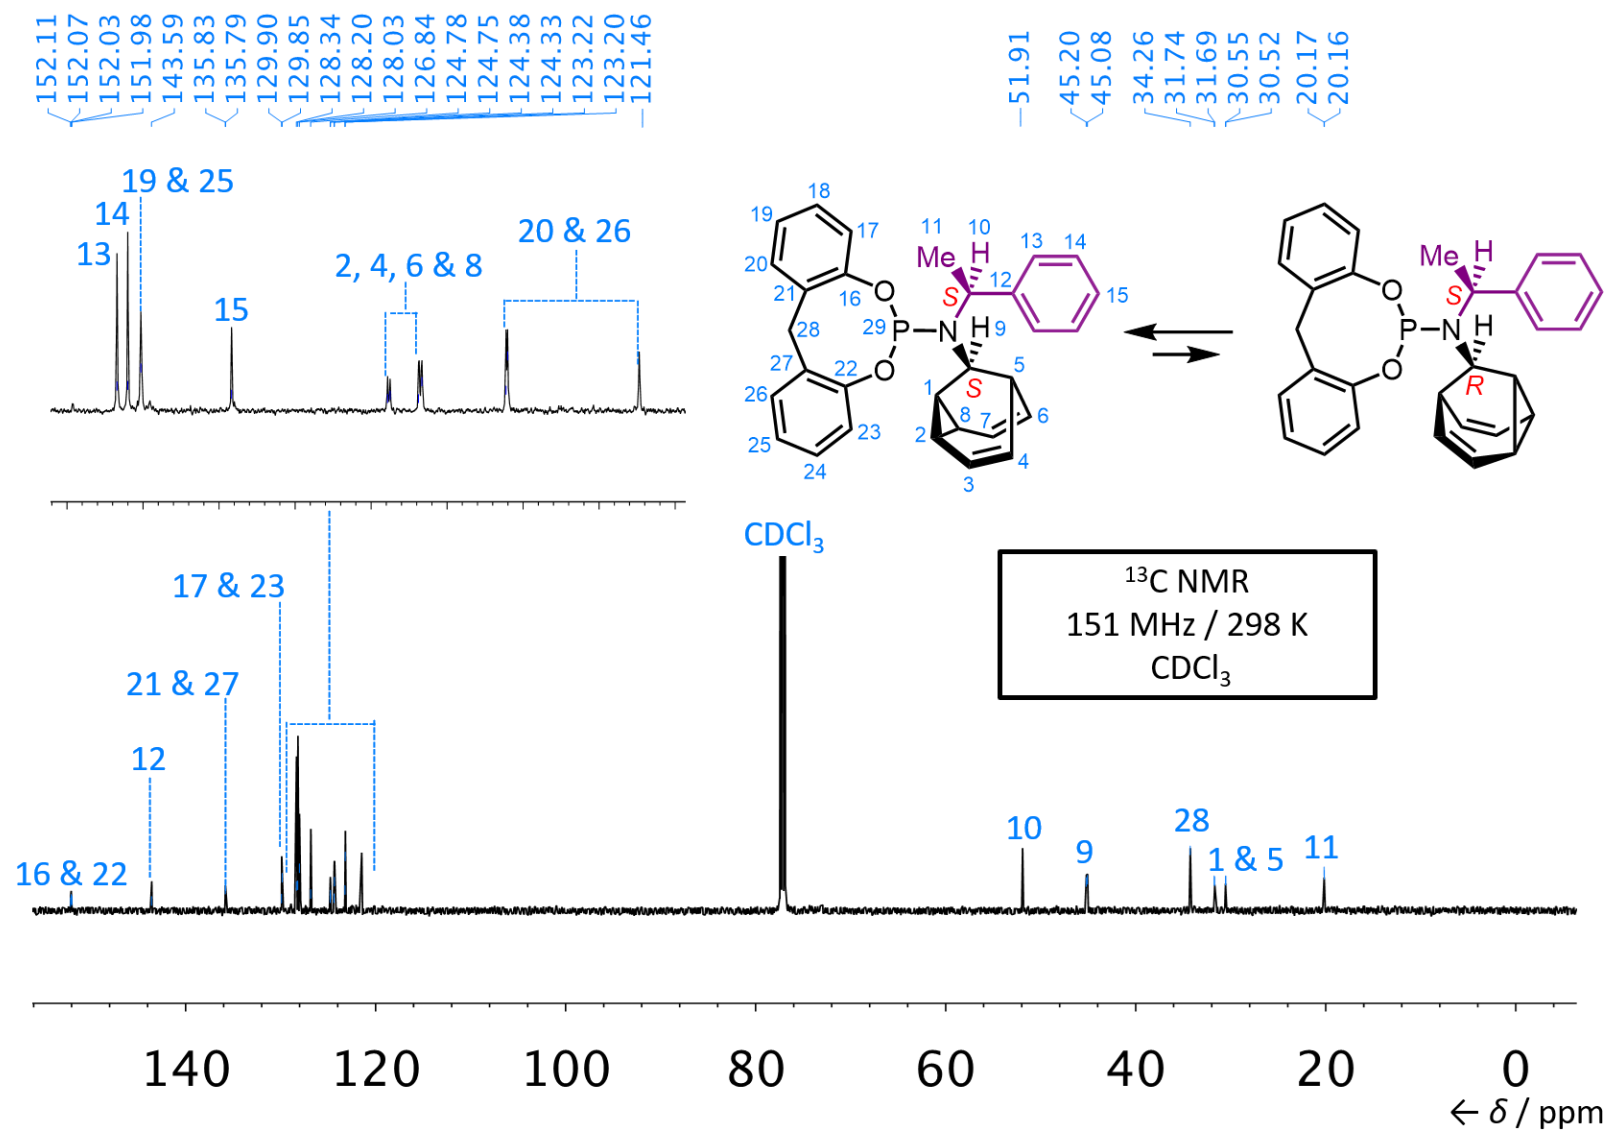

**Figure S27.** <sup>13</sup>C NMR spectrum of *(R,S)/(S,S)*-LBB.

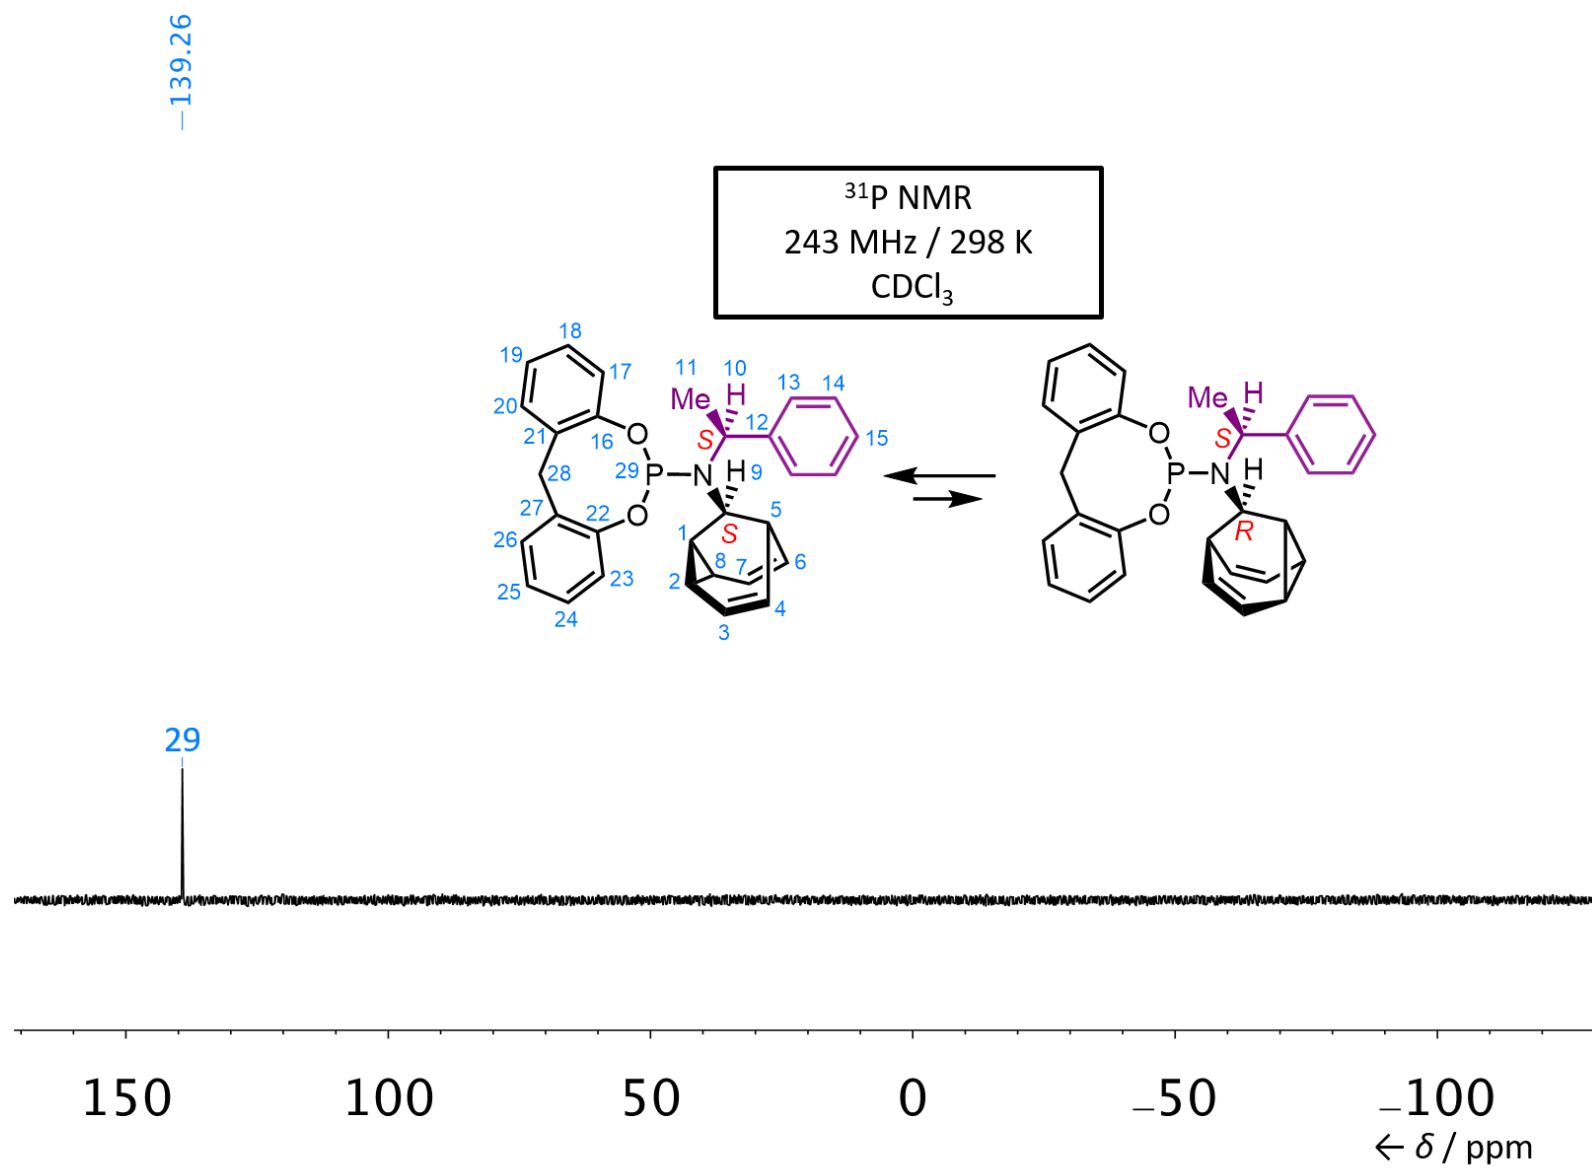

Figure S28. <sup>31</sup>P NMR spectrum of (R,S)/(S,S)-LBB.



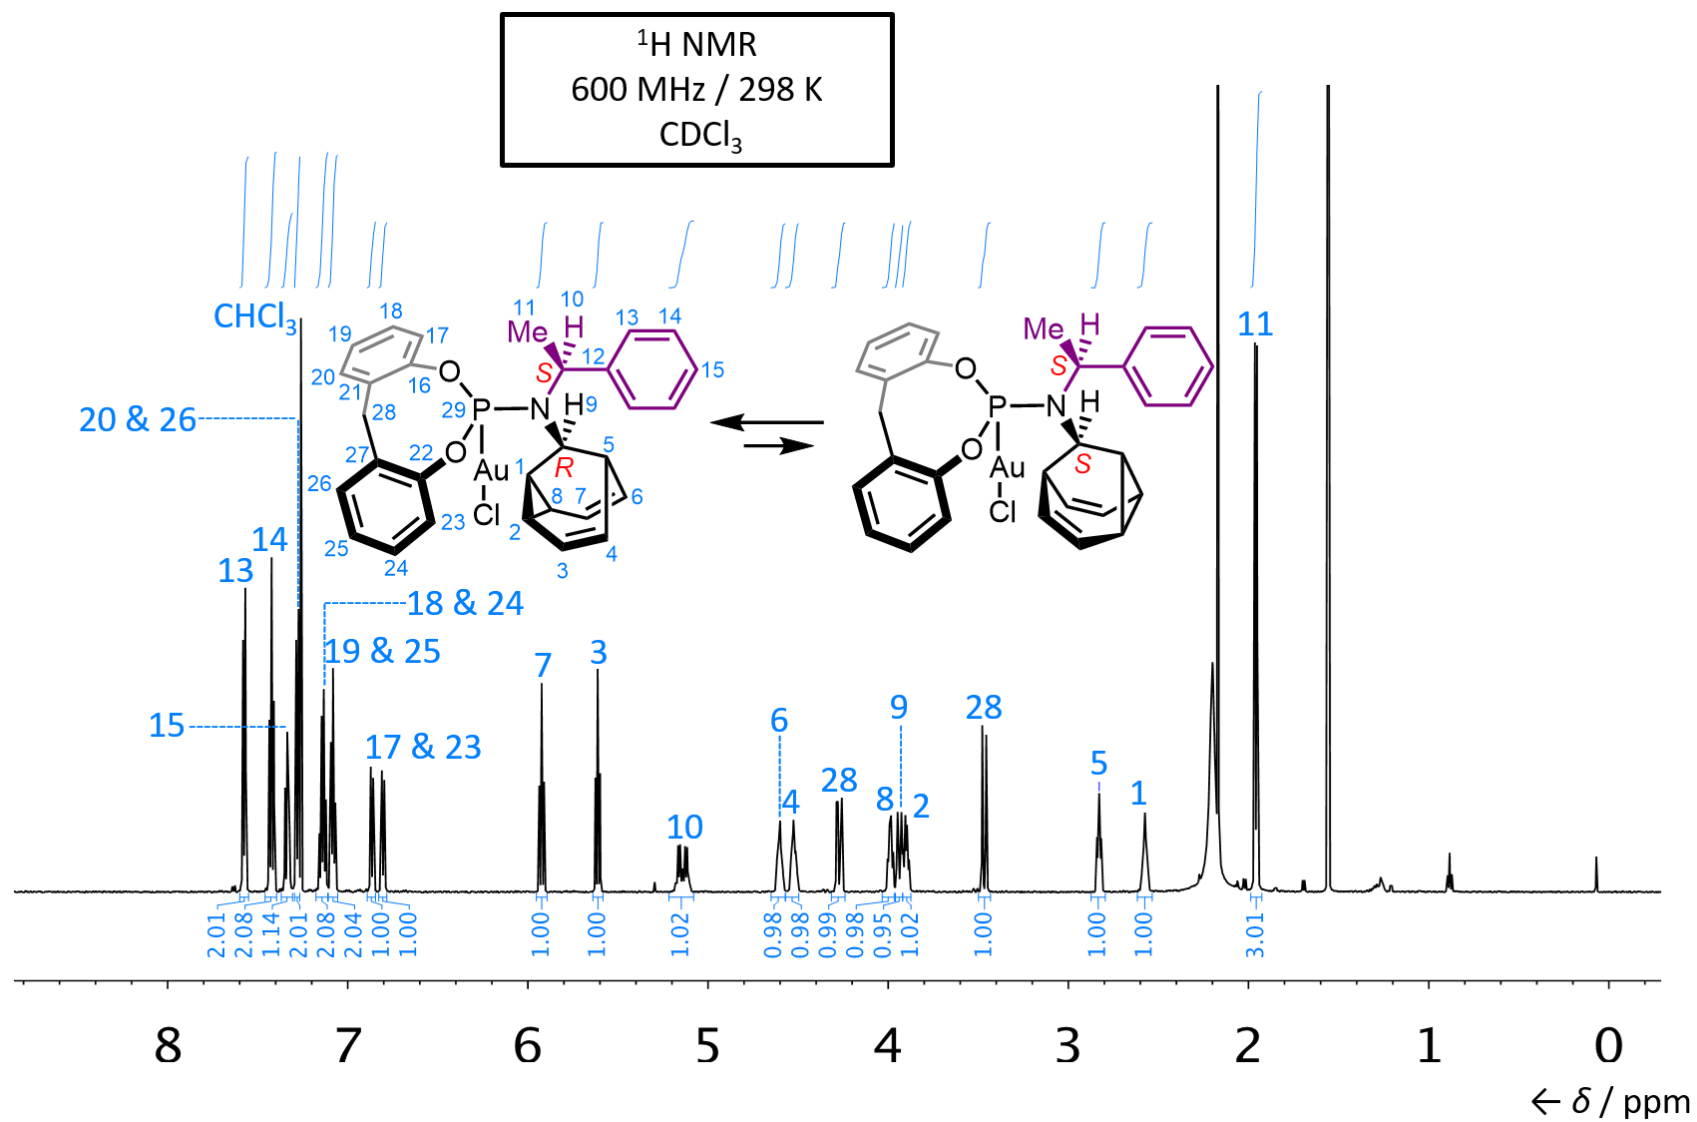

**Figure S29.** <sup>1</sup>H NMR spectrum of *(R,S)/(S,S)*-LBBAuCl.

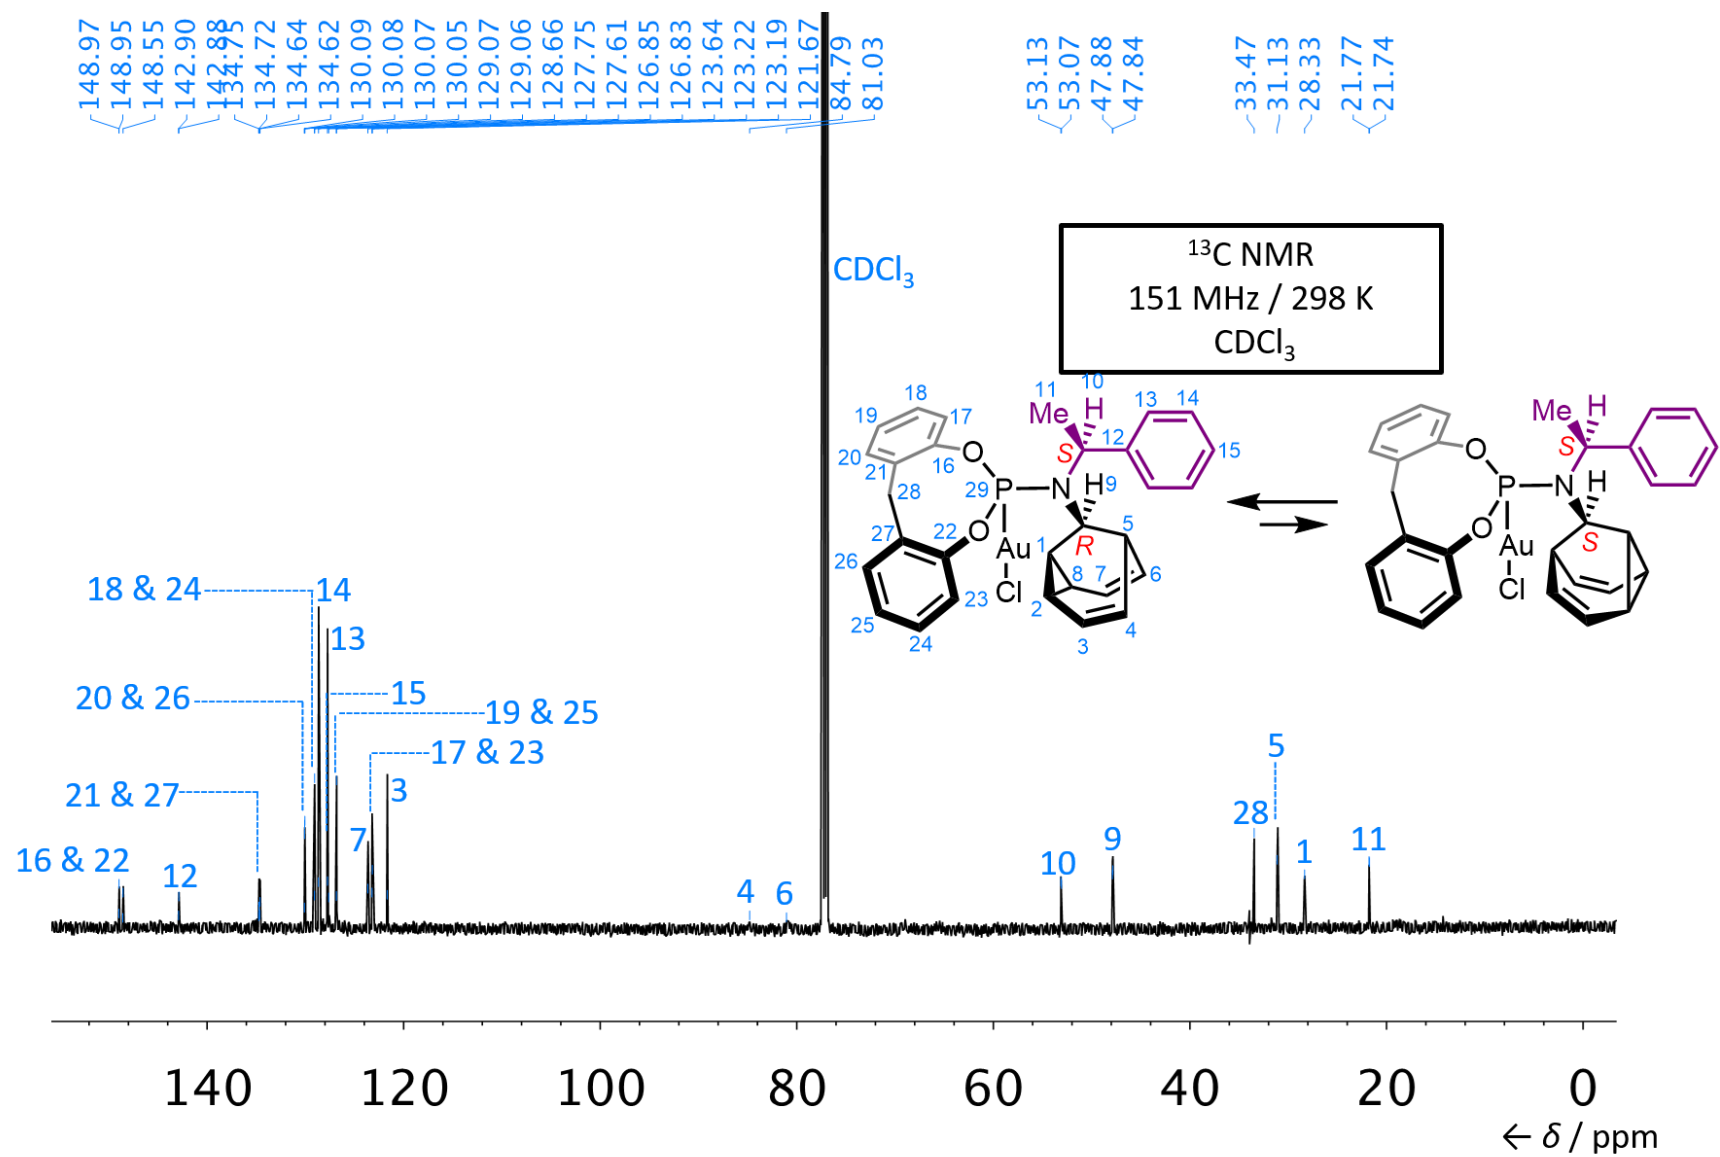

**Figure S30.**  $^{13}\text{C}$  NMR spectrum of  $(R,S)/(S,S)\text{-L}_{\text{BB}}\text{AuCl}$ .

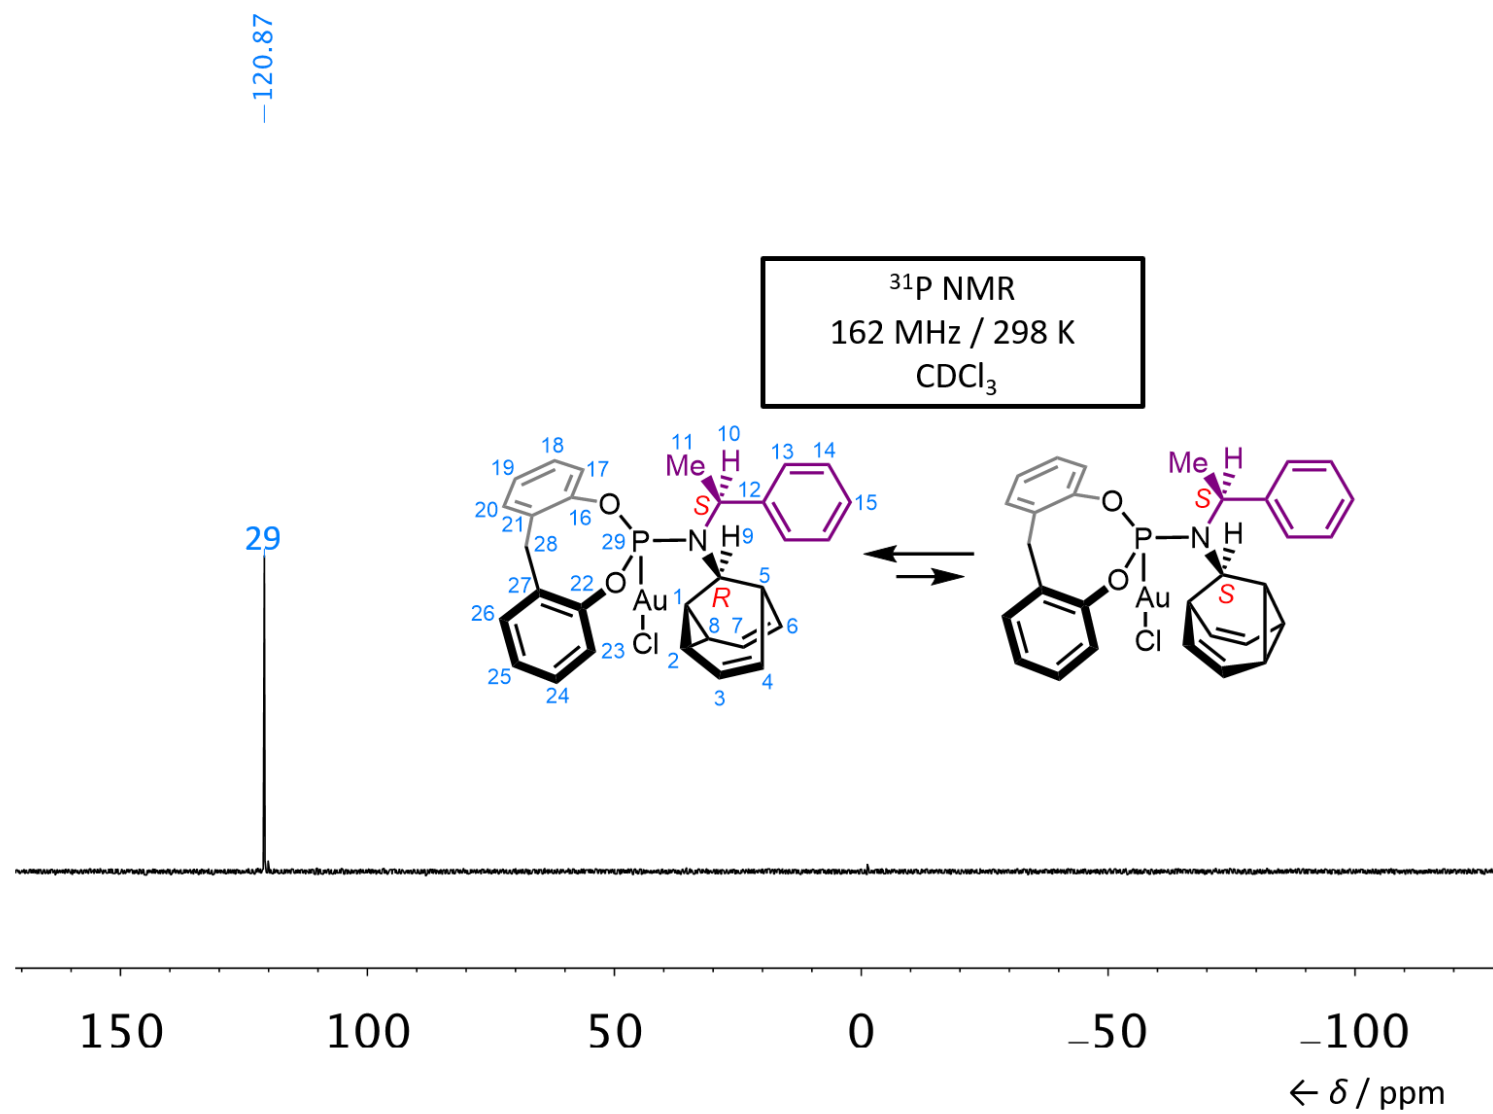

**Figure S31.**  $^{31}\text{P}$  NMR spectrum of  $(R,S)/(S,S)\text{-L}_{\text{BB}}\text{AuCl}$ .

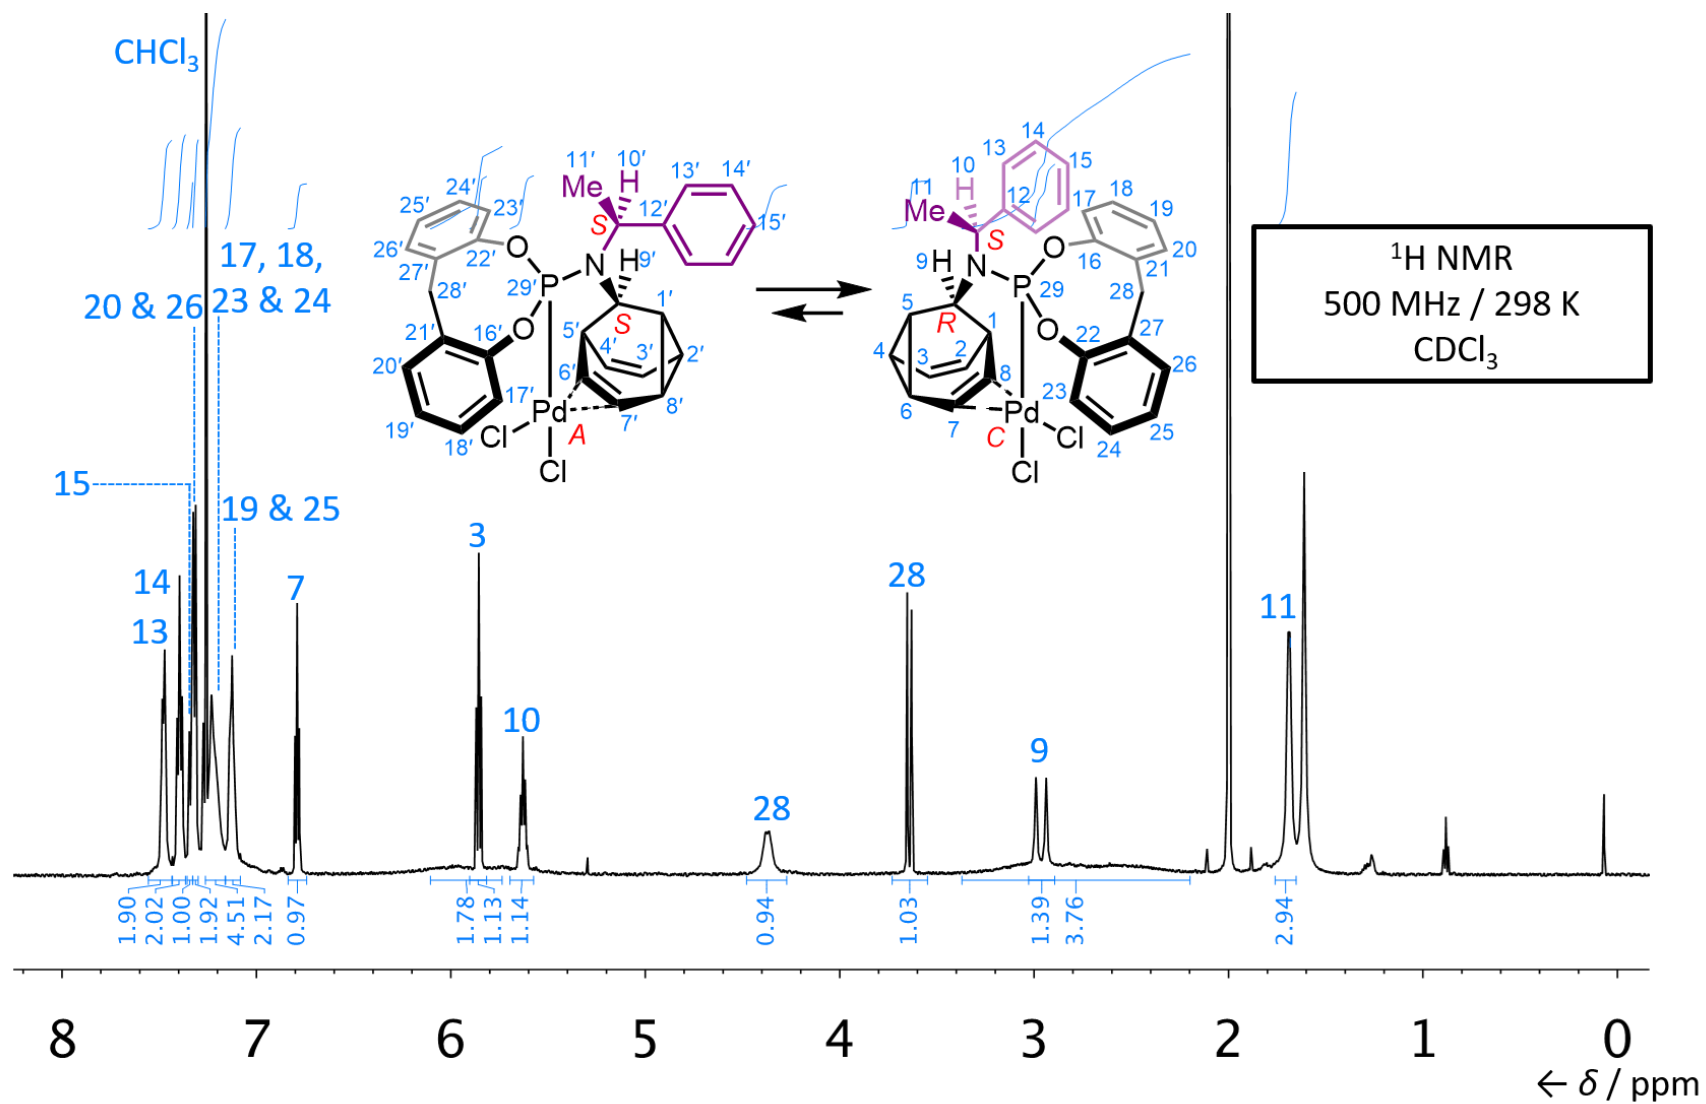

**Figure S32.**  $^1\text{H}$  NMR spectrum of  $(A,S,S)/(C,R,S)\text{-L}_{\text{BB}}\text{PdCl}_2$  (298 K).

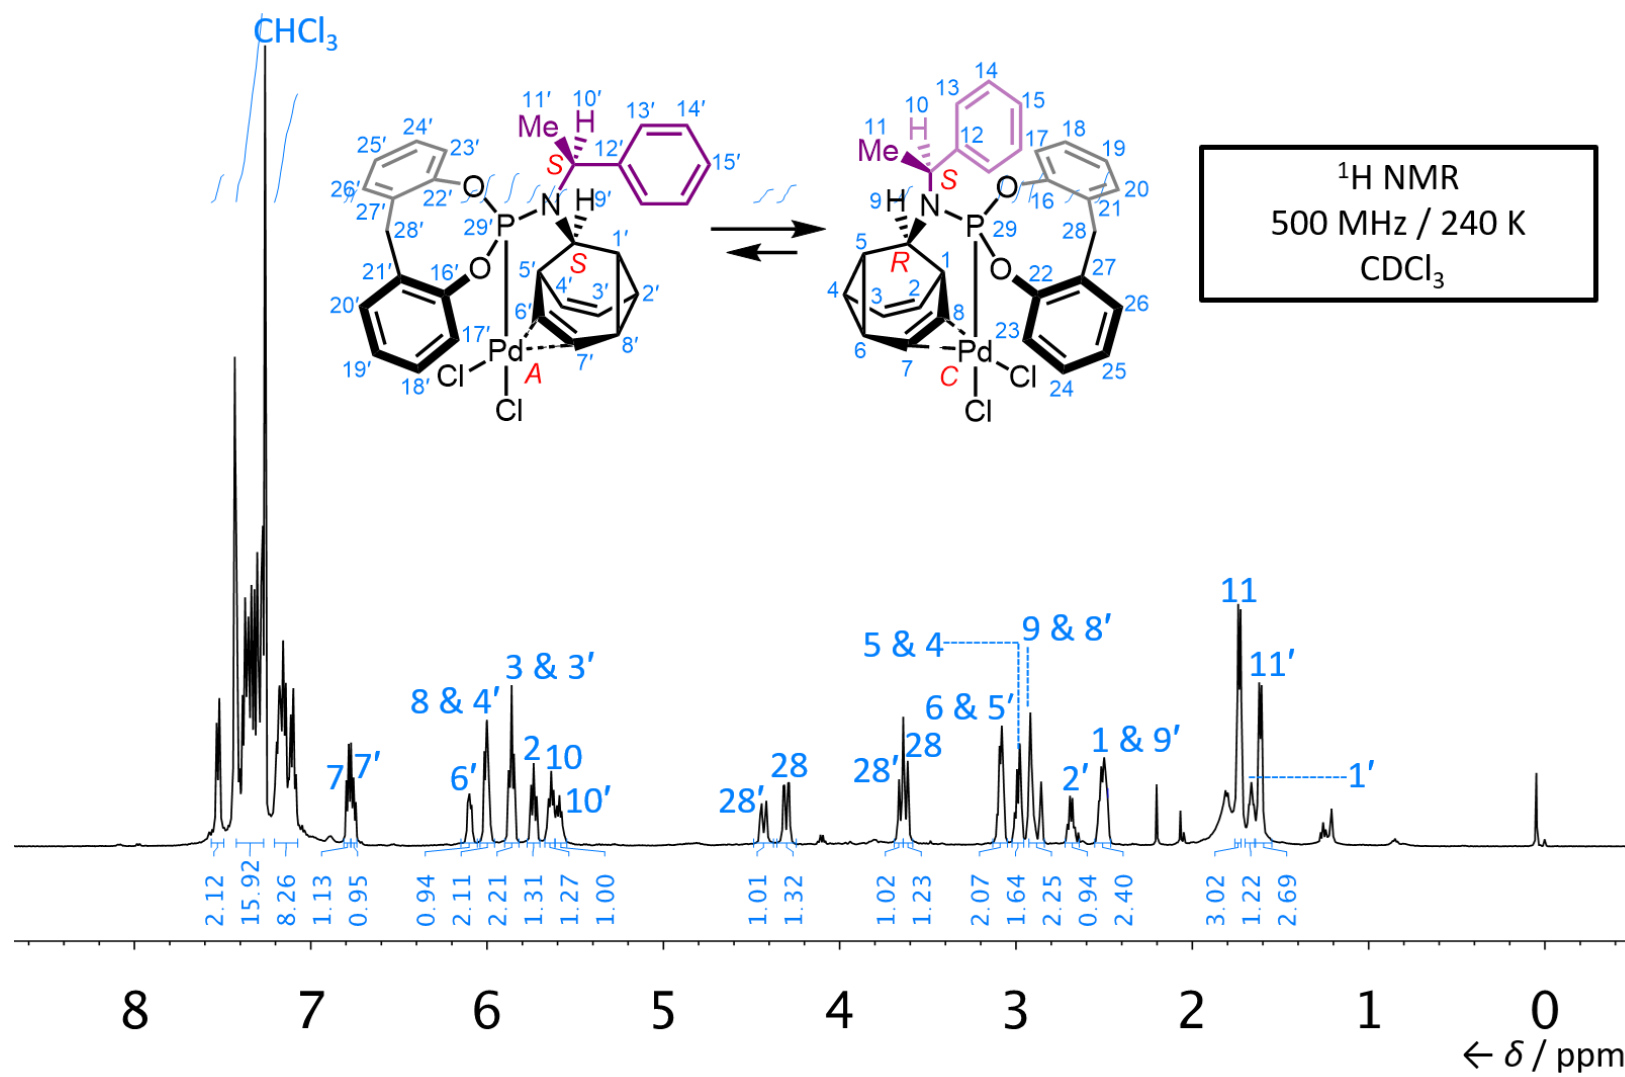

**Figure S33.** <sup>1</sup>H NMR spectrum of (A,S,S)/(C,R,S)-L<sub>BB</sub>PdCl<sub>2</sub> (240 K).

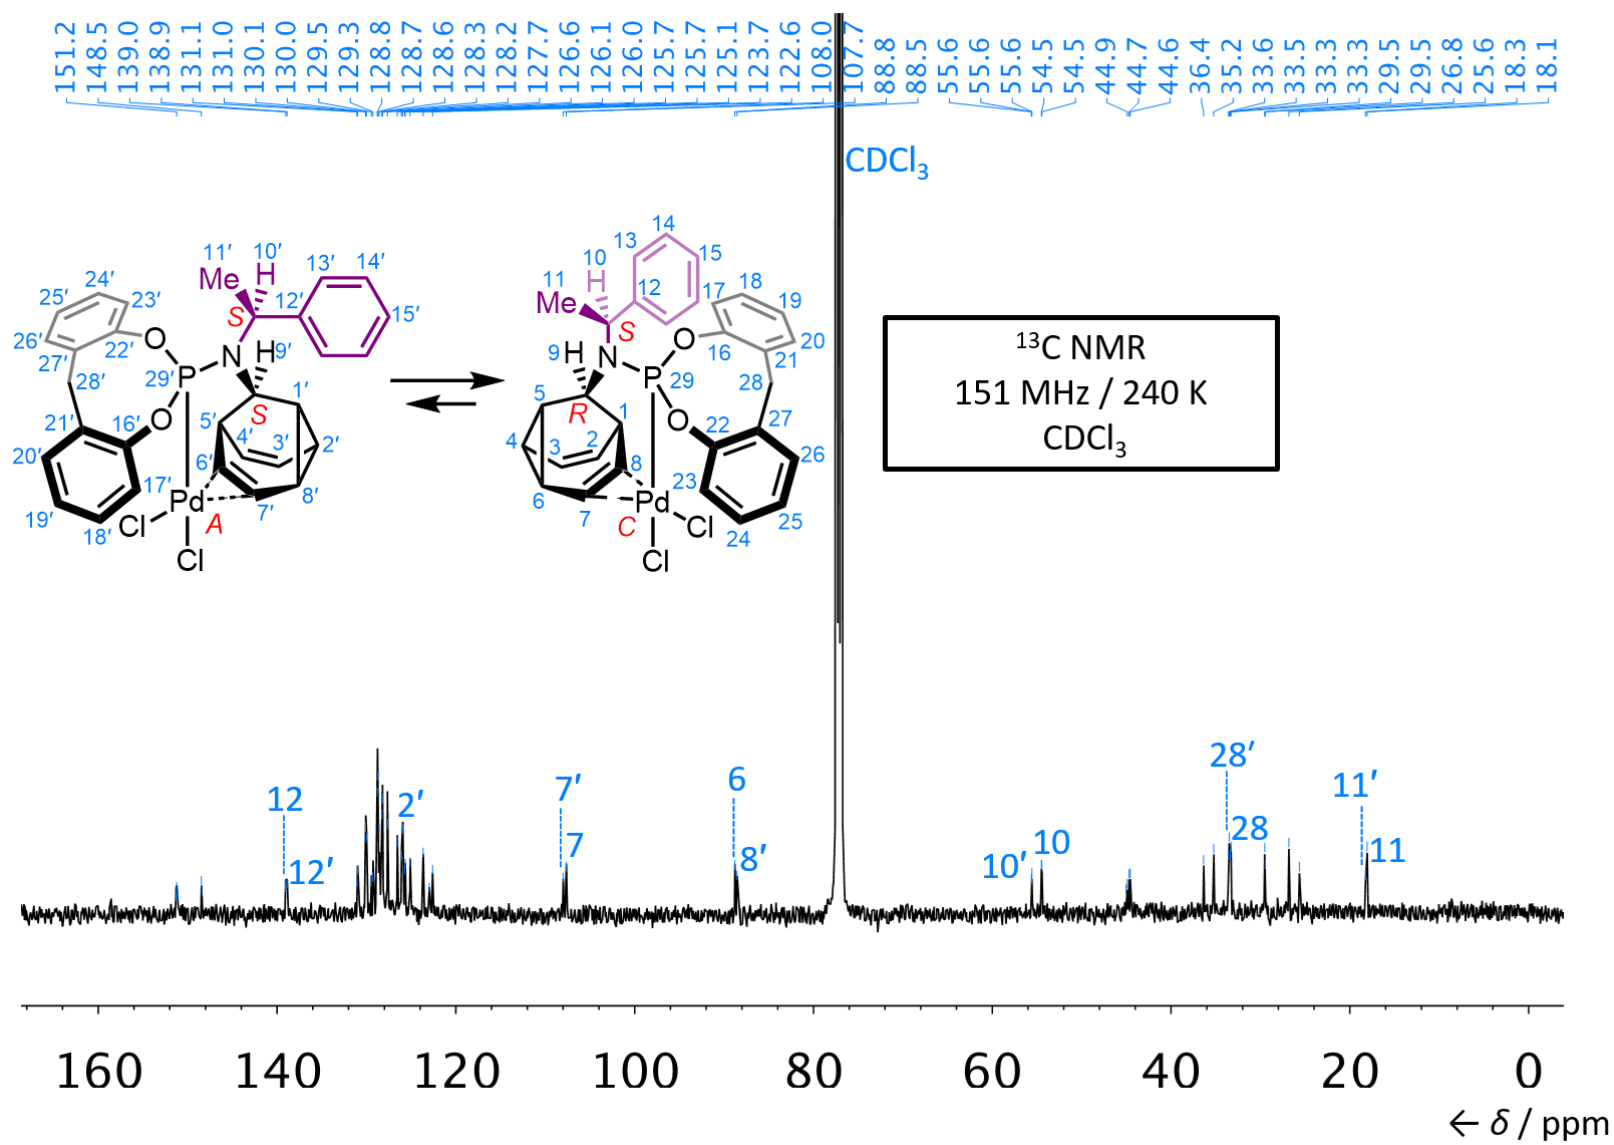

**Figure S34.** <sup>13</sup>C NMR spectrum of (A,S,S)/(C,R,S)-L<sub>BB</sub>PdCl<sub>2</sub> (240 K).

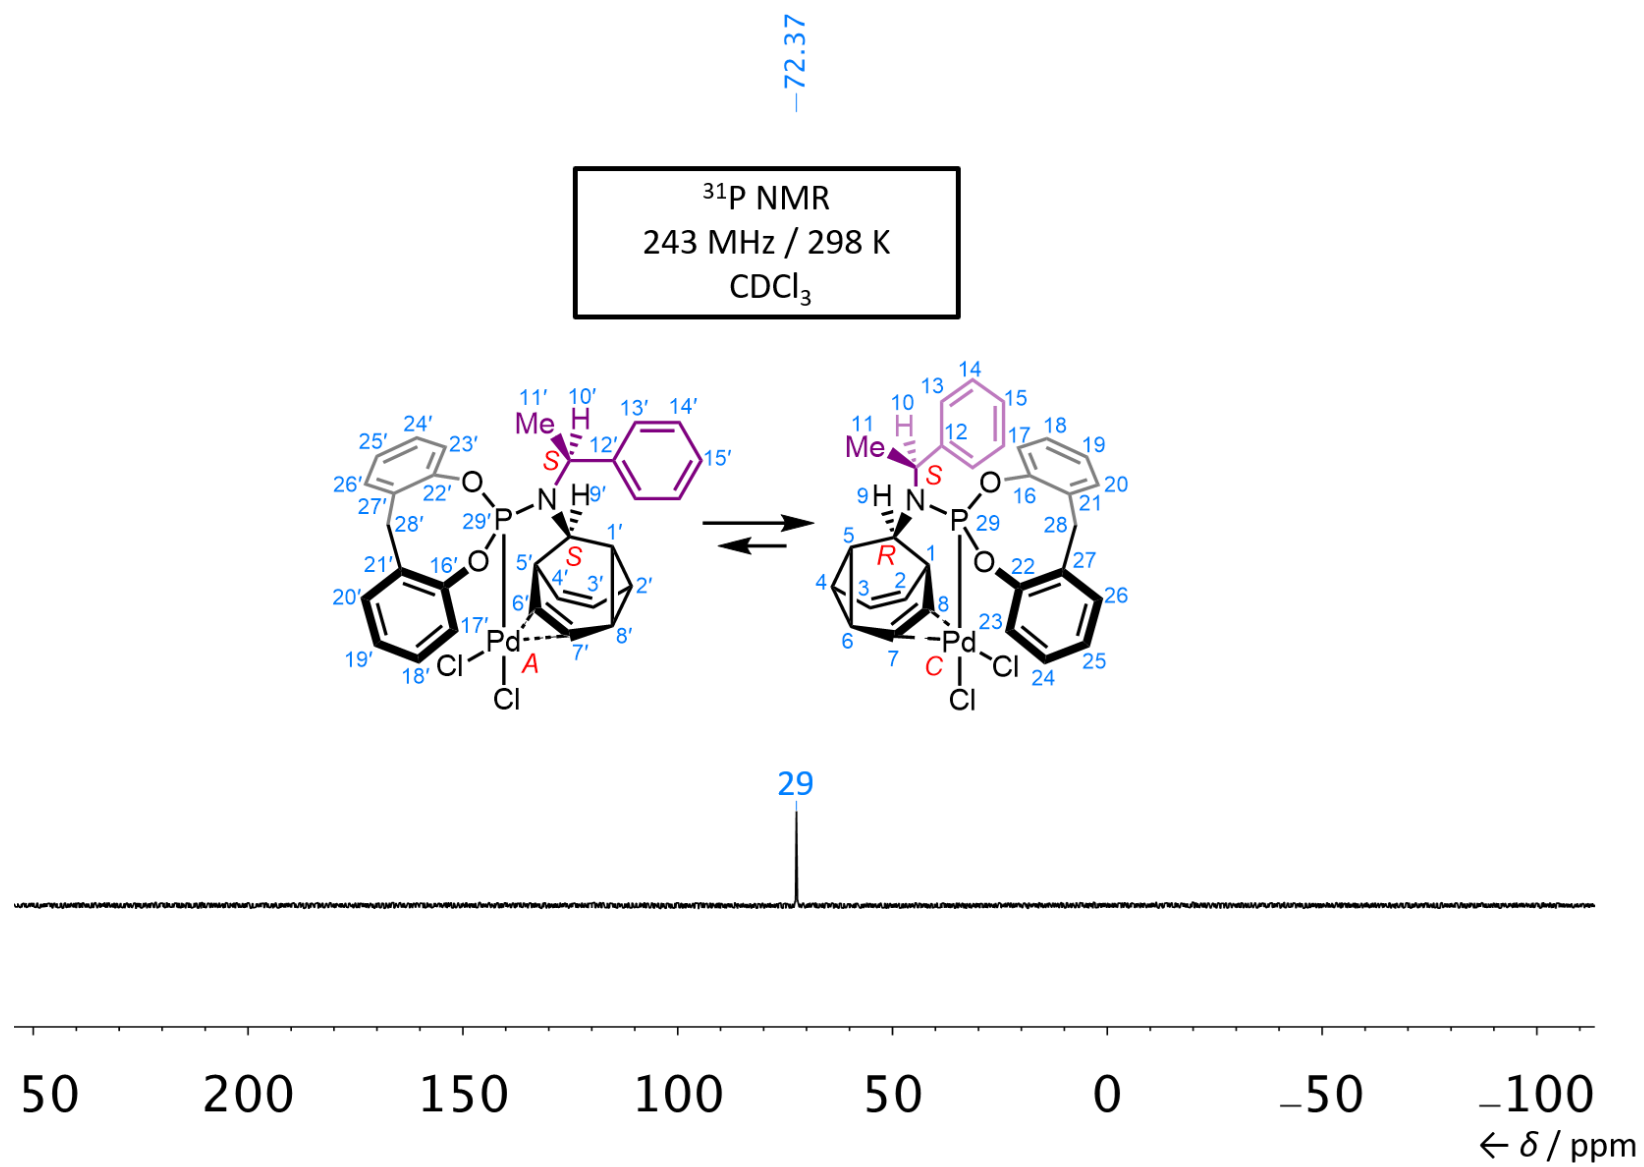

**Figure S35.**  $^{31}\text{P}$  NMR spectrum of  $(A,S,S)/(C,R,S)\text{-L}_{\text{BB}}\text{PdCl}_2$  (298 K).

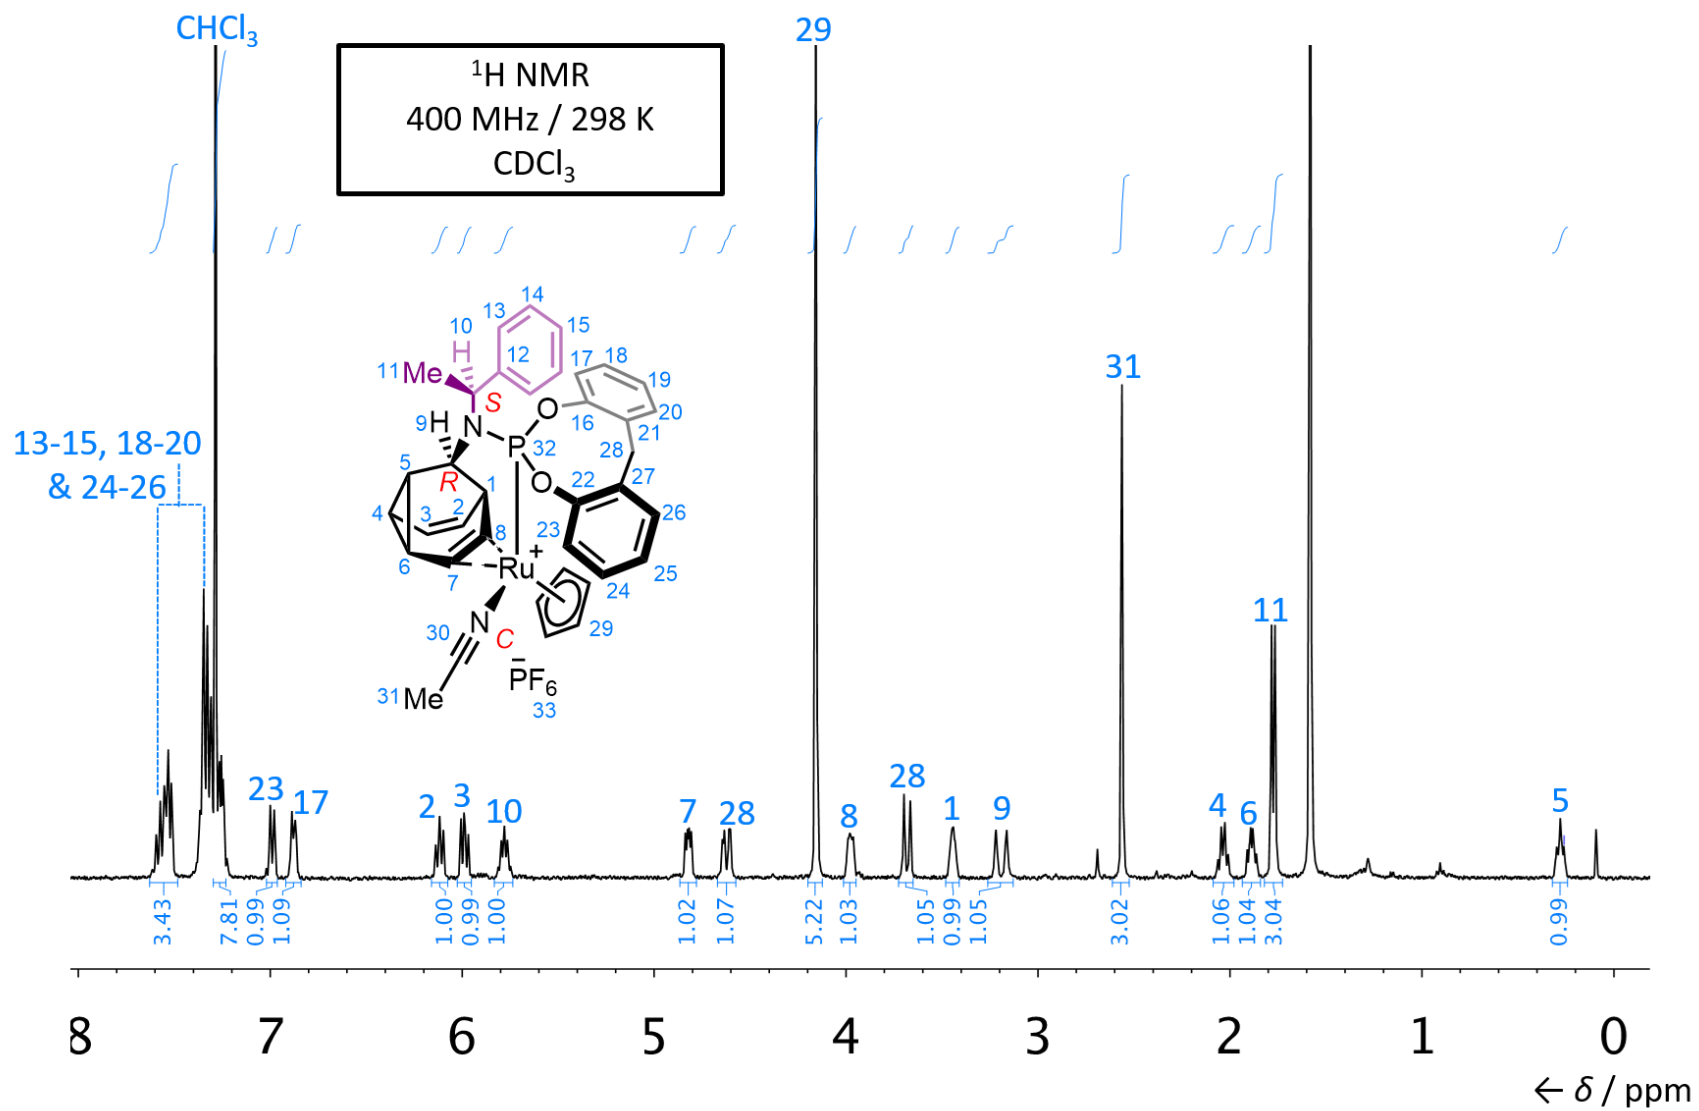

Figure S36. <sup>1</sup>H NMR spectrum of (C,R,S)-L<sub>BB</sub>RuCp(NCMe)·PF<sub>6</sub>.



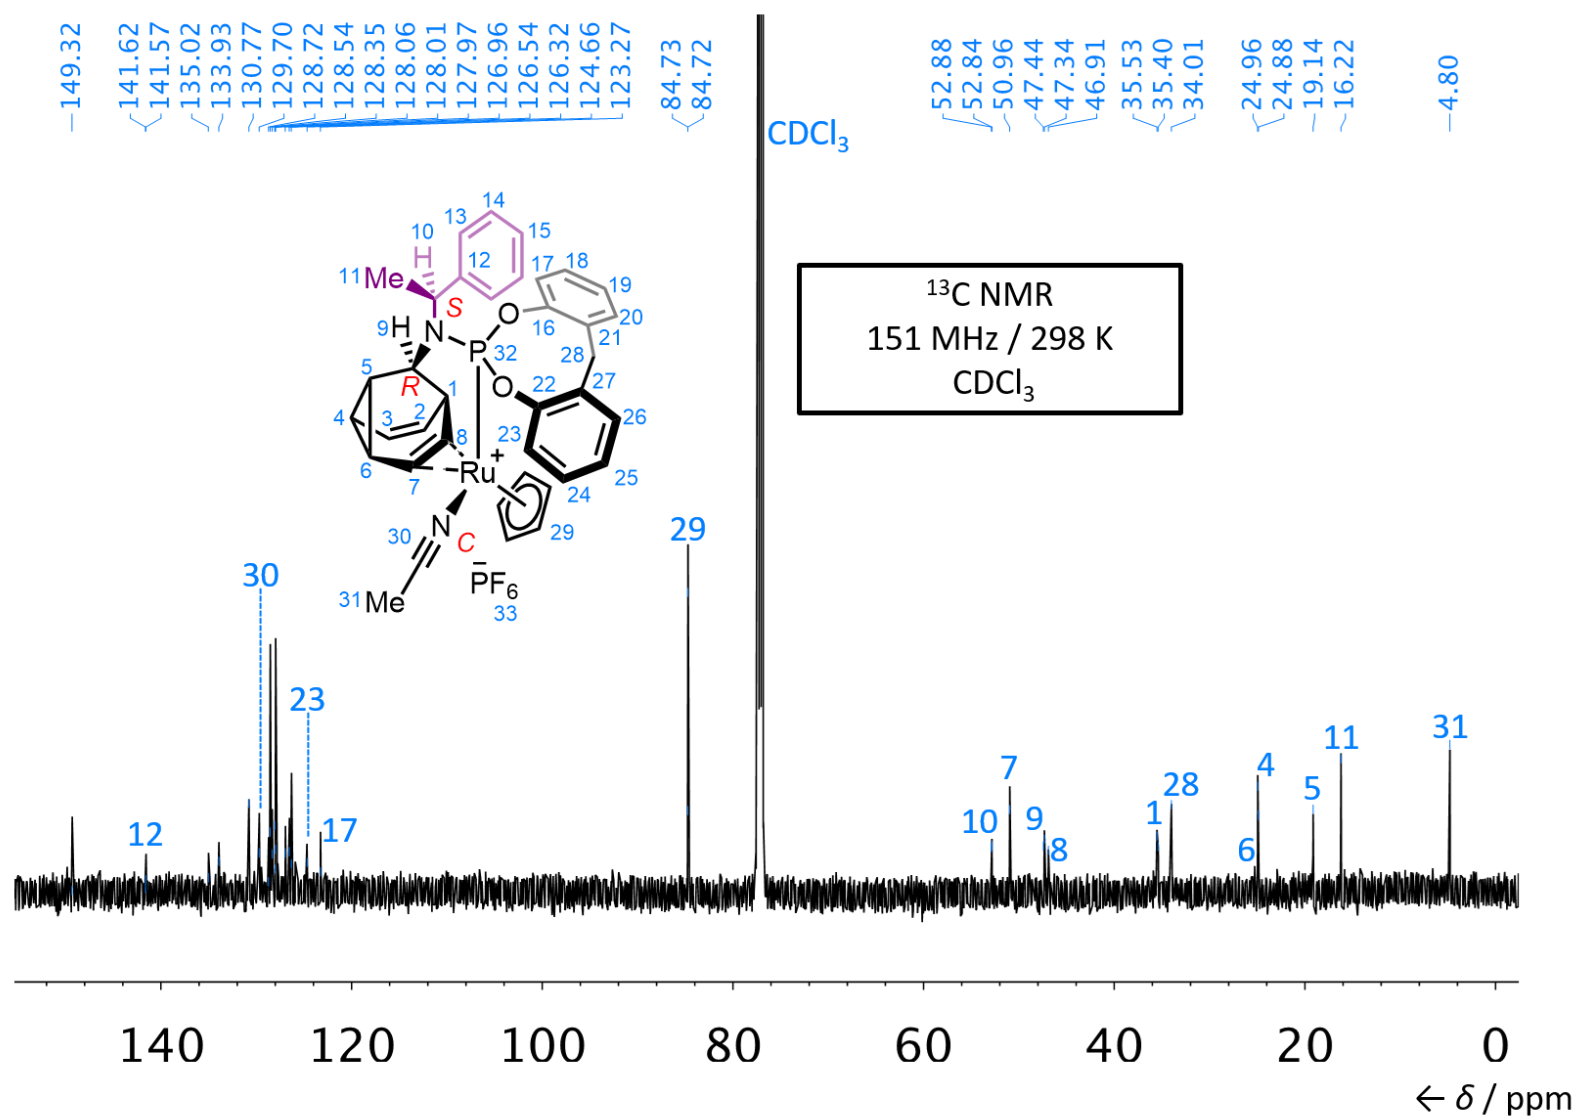

**Figure S37.** <sup>13</sup>C NMR spectrum of (C,R,S)-L<sub>88</sub>RuCp(NCMe)·PF<sub>6</sub>.

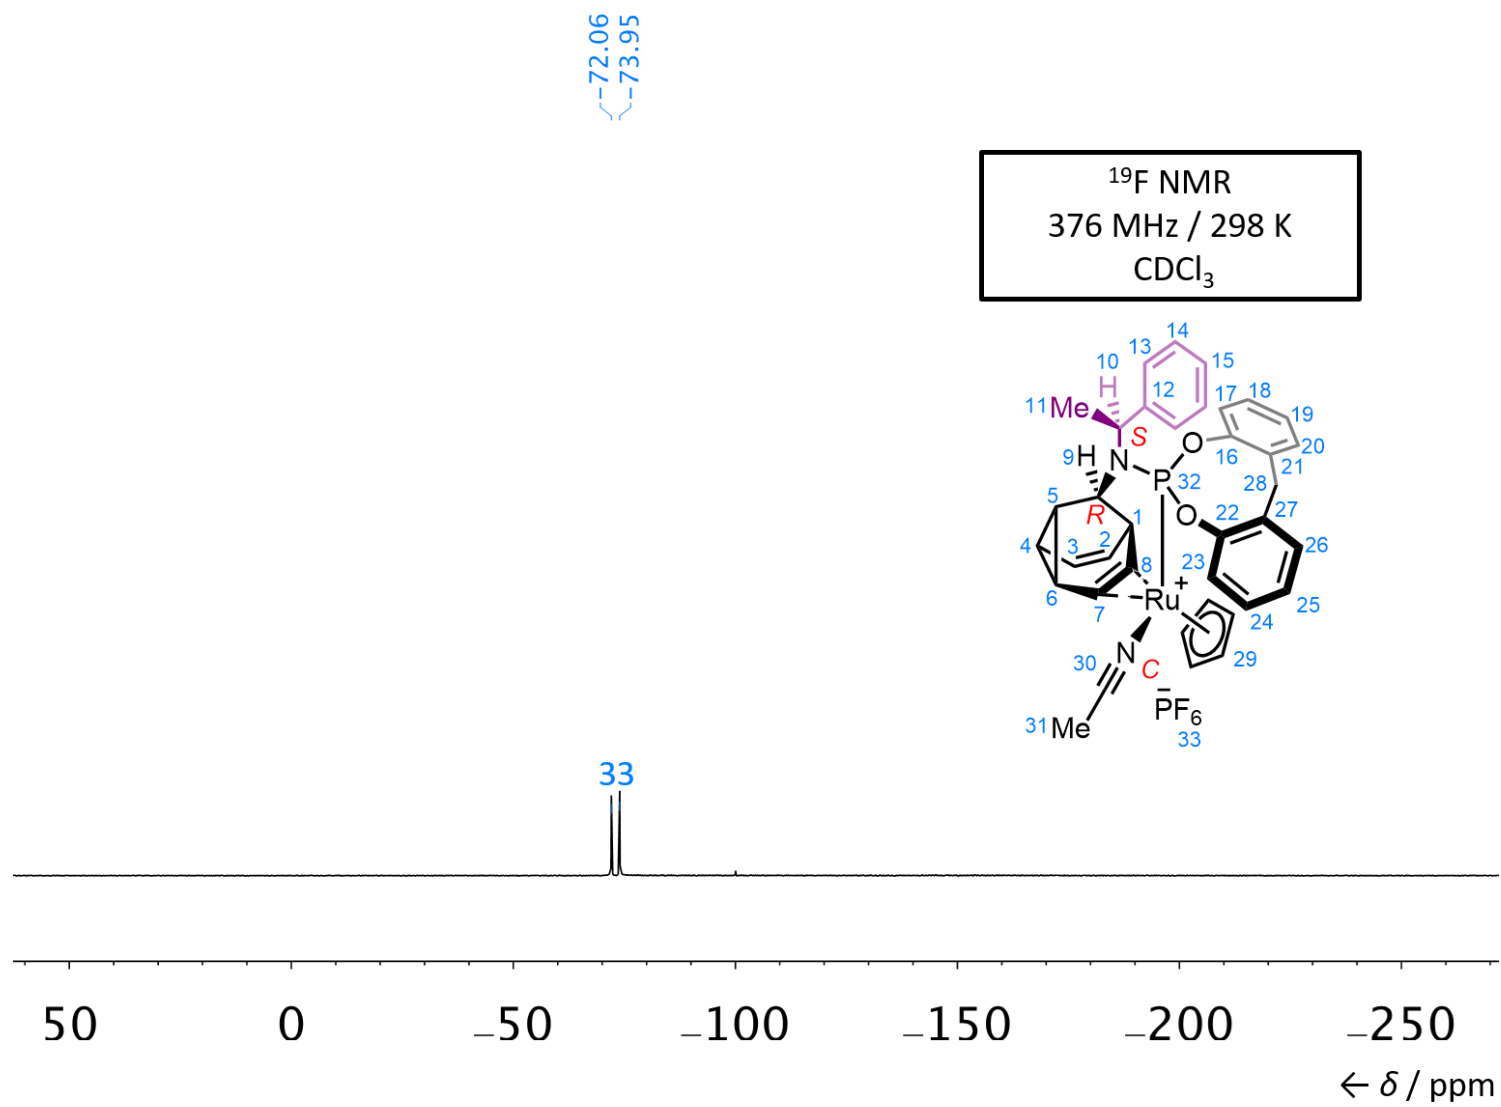

**Figure S38.**  $^{19}\text{F}$  NMR spectrum of  $(C,R,S)\text{-L}_{\text{BB}}\text{RuCp}(\text{NCMe})\cdot\text{PF}_6$ .

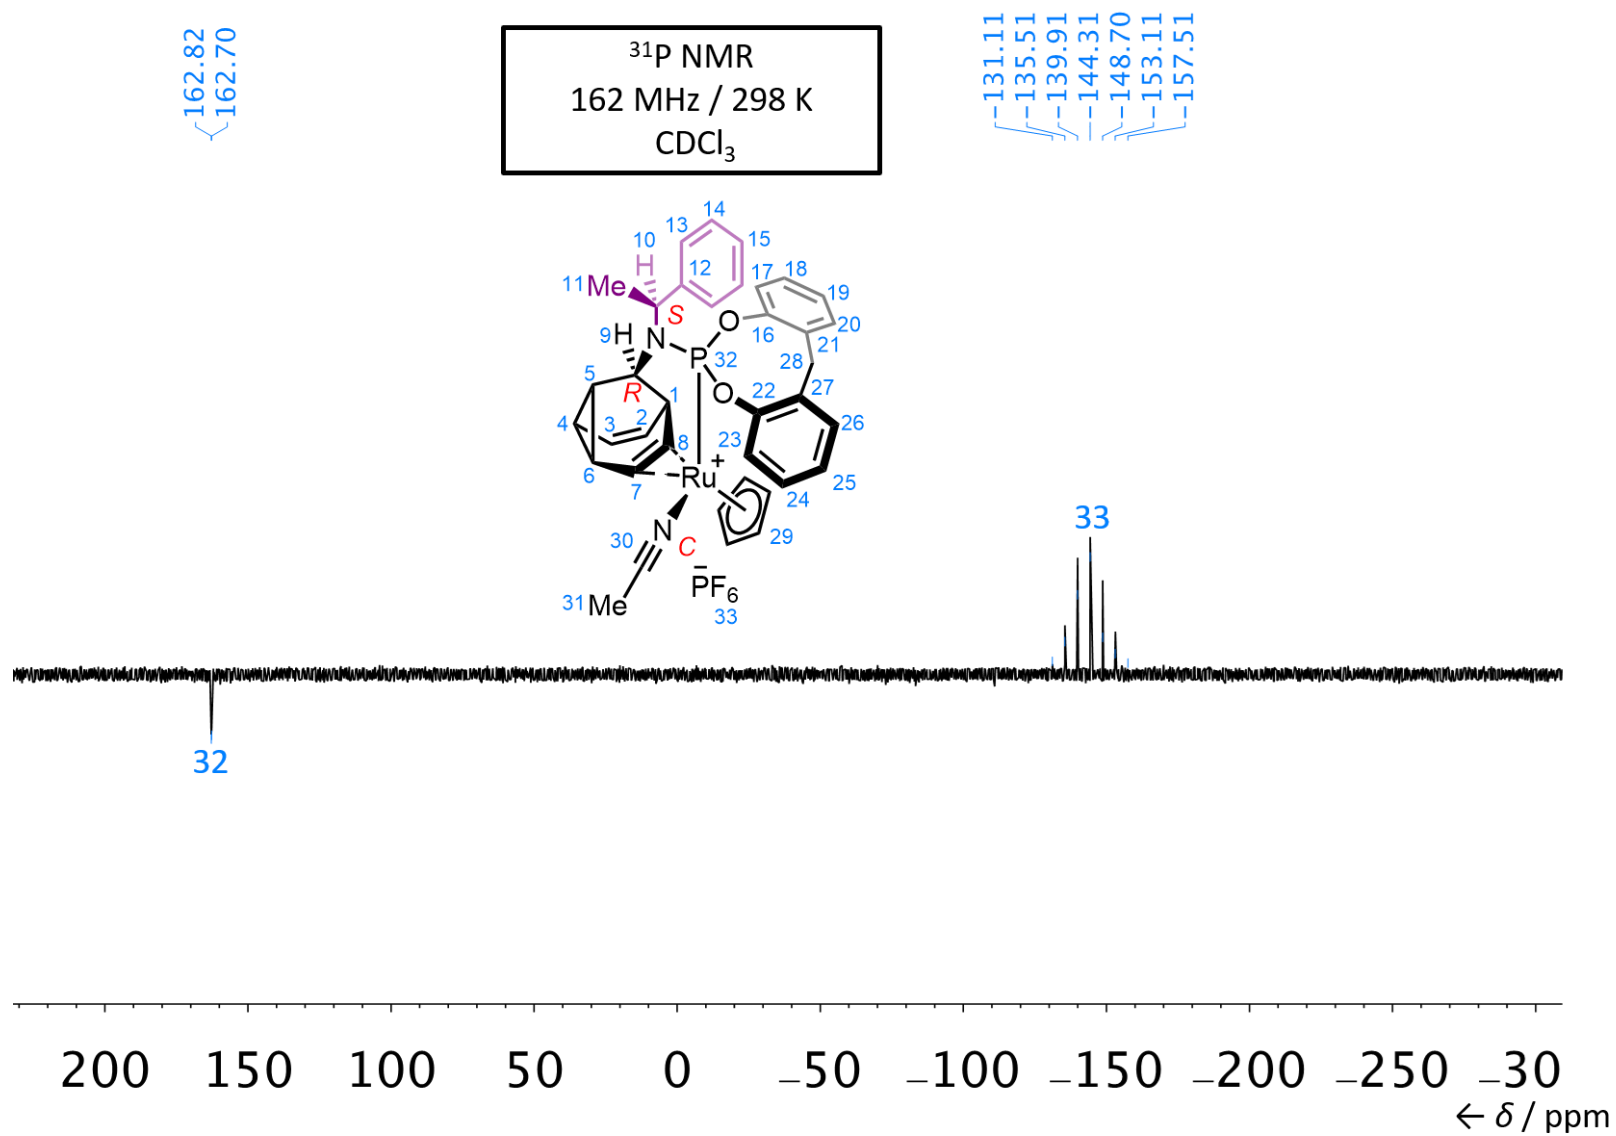

**Figure S39.**  $^{31}\text{P}$  NMR spectrum of  $(C,R,S)\text{-L}_{\text{BB}}\text{RuCp}(\text{NCMe})\cdot\text{PF}_6$ .

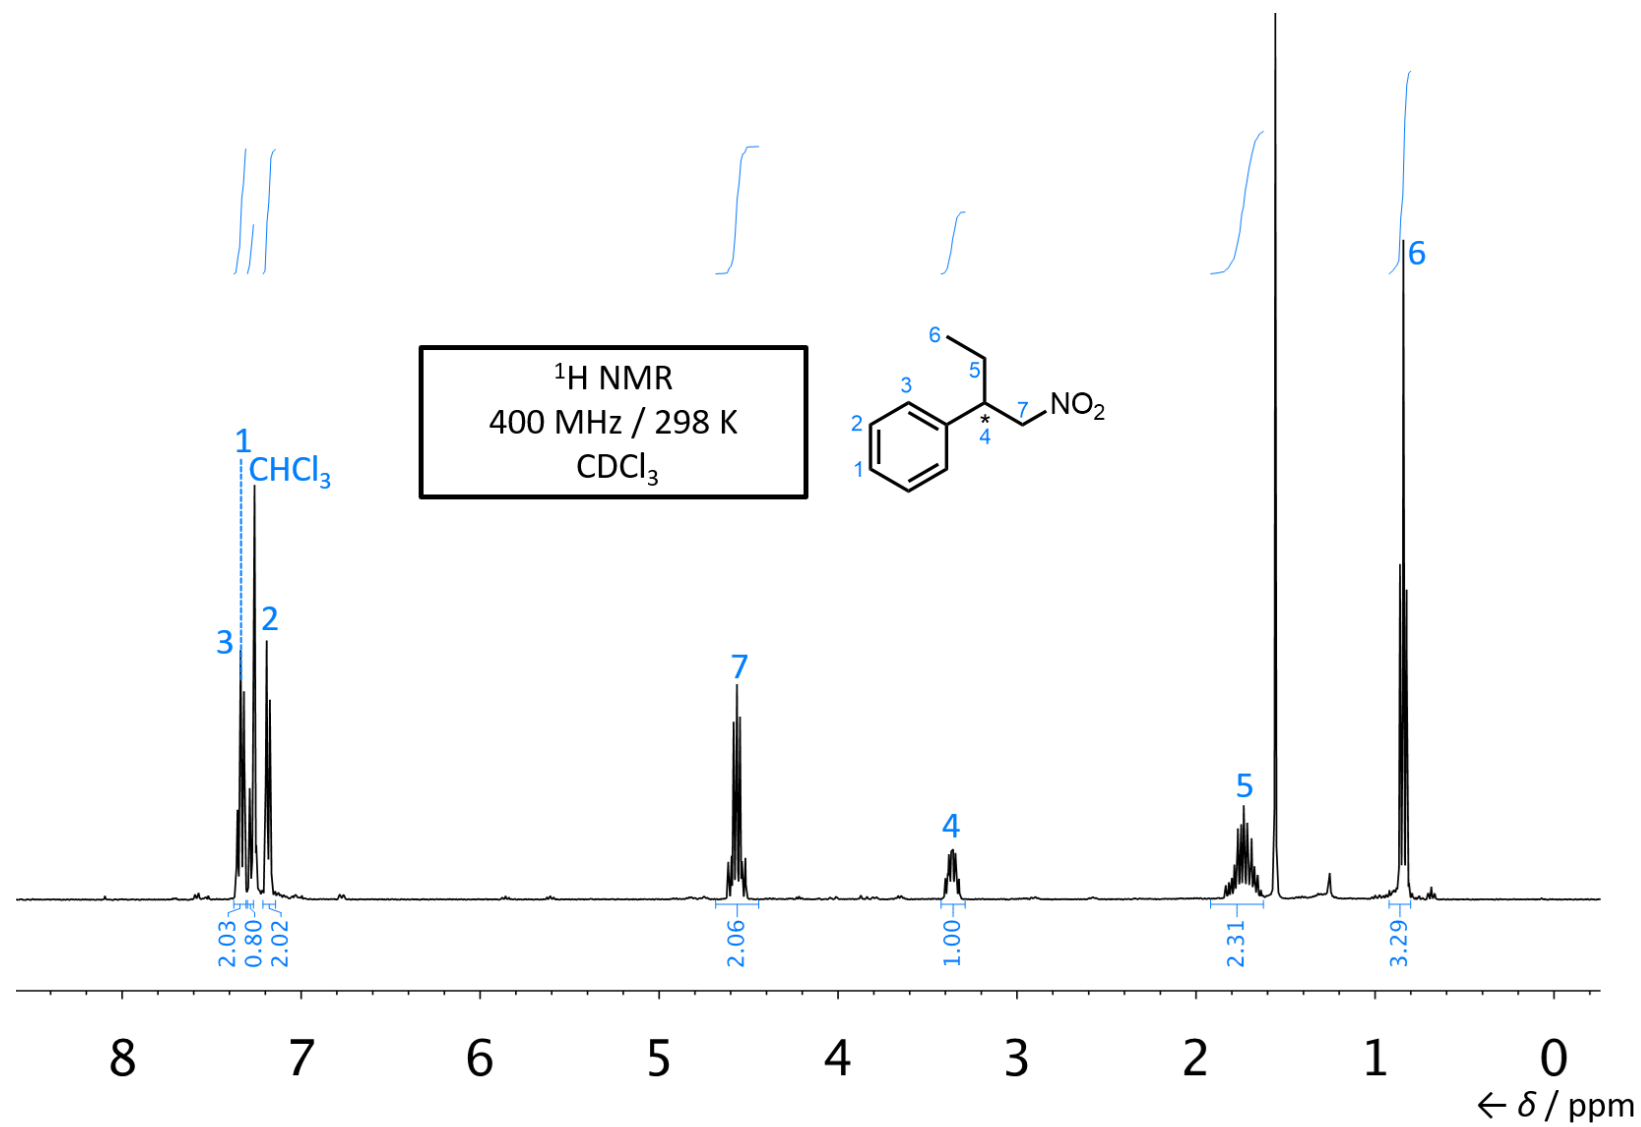

Figure S40. <sup>1</sup>H NMR spectrum of **NPB**.

### 3.1 Structural Assignment by Two-Dimensional (2D) NMR

In order to distinguish the ‘front’ of the molecule from the ‘back’ of the molecule, we used 2D NMR spectroscopy. Briefly, we are able to differentiate which peaks are on the same face of the molecule through analysis of COSY correlations (Figure S41). For example, the olefin which is either 7 or 3 only correlates to one pair of the olefin and cyclopropane positions (2 and 4). Therefore, we can confirm that these positions are on the same face.

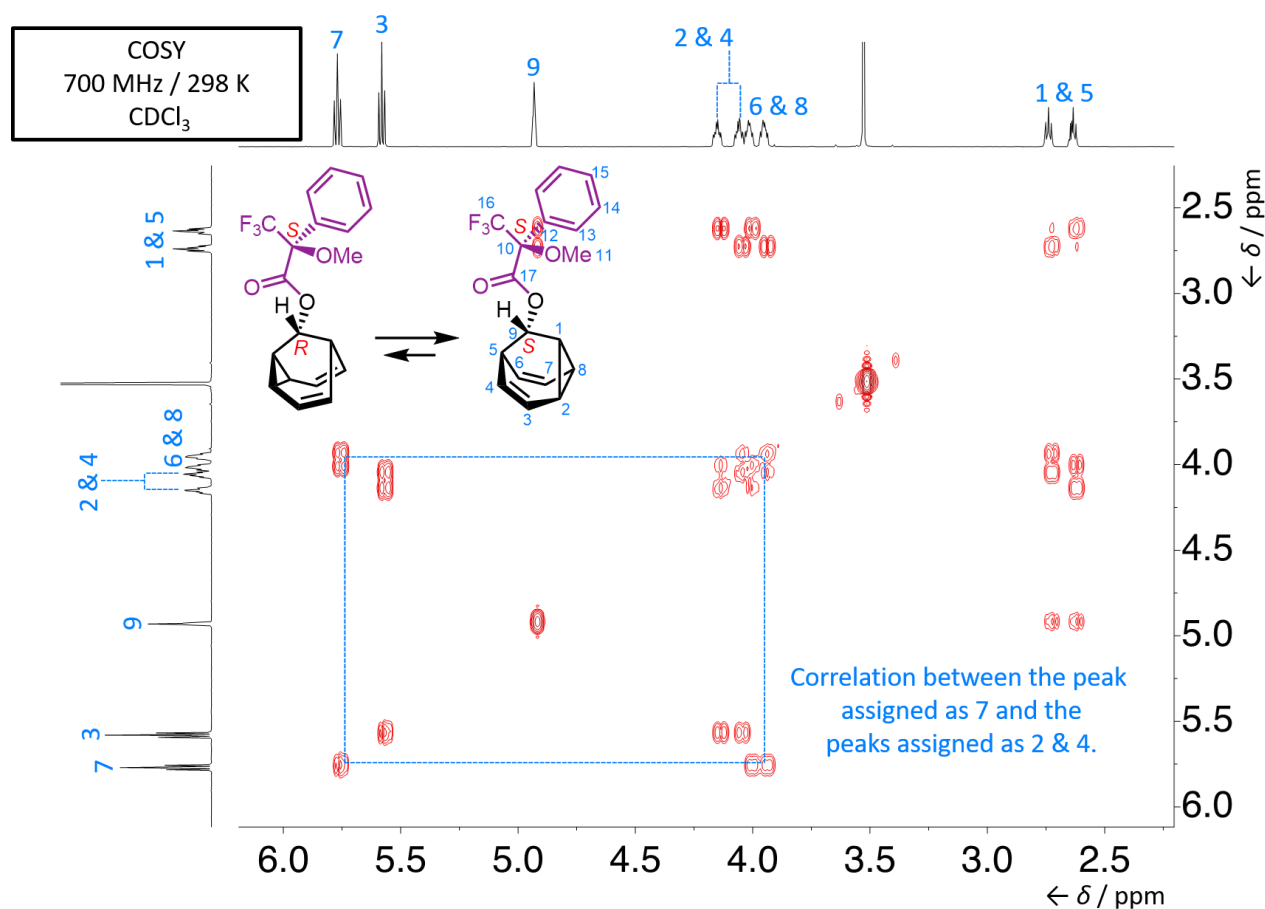

**Figure S41.** Partial COSY spectrum of (*R,S*)/(*S,S*)-**2**.

A NOESY correlation between the hydrogen at position 9 to a proton environment on one of the faces of the barbaralyl core allows for determination of the relative configuration of the stereogenic centre. A critical NOESY correlation between the hydrogen at position 9 and a pair of olefin and

cyclopropane positions (2 and 4) confirms that these environments must be on the same face, therefore the front and back of the barbaralyl core can be distinguished (Figure S42). This assignment can be applied to barbaralane (*R,R*)/(*S,R*)-**2** and (*R*)/(*S*)-**6**. Barbaralanes (*S,S*)/(*R,S*)-**5** and (*R,S*)/(*R,R*)-**5** do not exhibit a NOESY correlation. However, we observe the same chemical shift peak pattern as barbaralane (*R,S*)/(*S,S*)-**2** and, therefore, assign the front and back signals by analogy. 2D NMR spectroscopy does not allow us to differentiate between some of the protons on the barbaralyl core. For example, we cannot differentiate between the positions 2 and 4 of compound (*R,S*)/(*S,S*)-**2**.

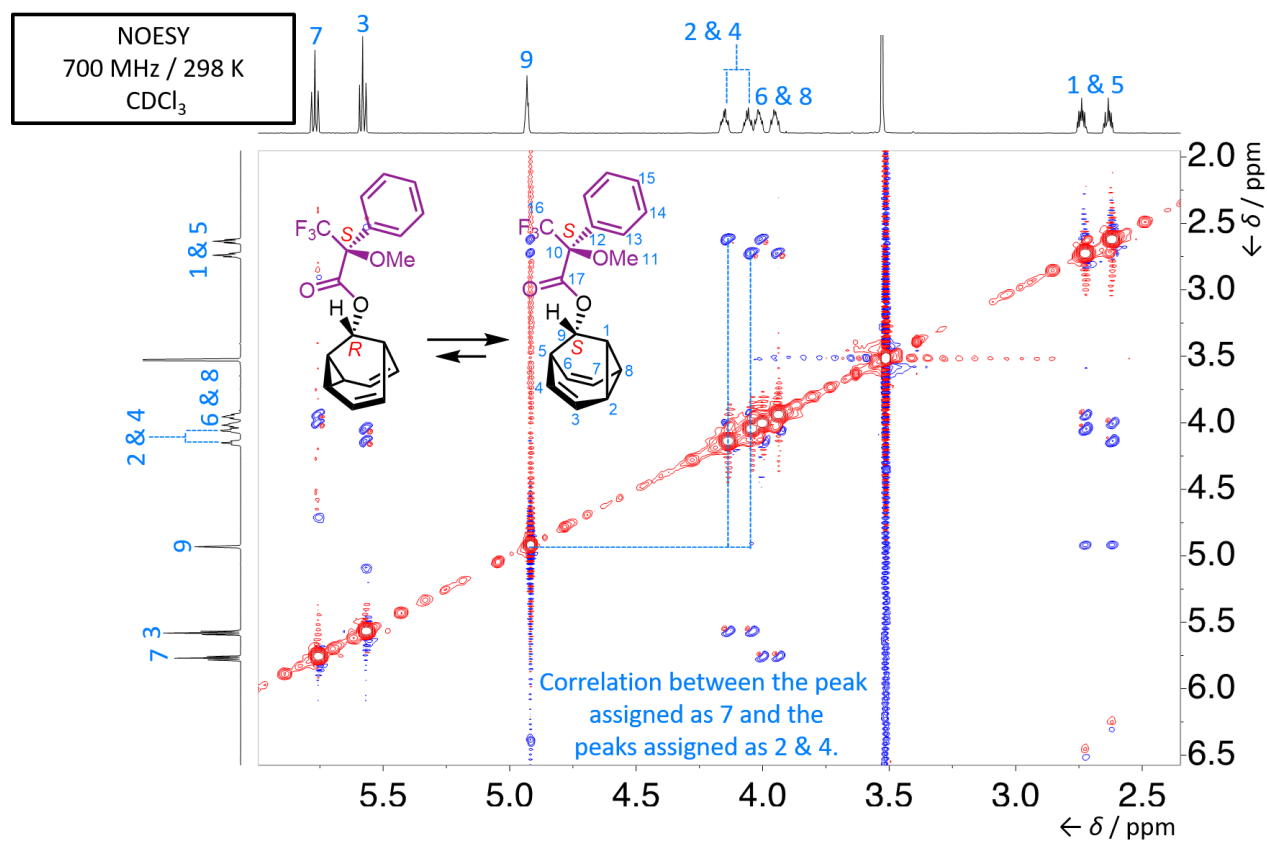

**Figure S42.** Partial NOESY spectrum of (*R,S*)/(*S,S*)-**2**.

#### 4. High-Performance Liquid Chromatography (HPLC)

Analytical chiral HPLC (Figure S43) (ChiralPak OD column, isocratic elution with hexanes:*i*PrOH (98:2), 212 nm detection) was performed to separate the scalemic mixture of the **NPB** sample. The mixture was determined to have an enantiomeric ratio of 69:31 (Table S1).

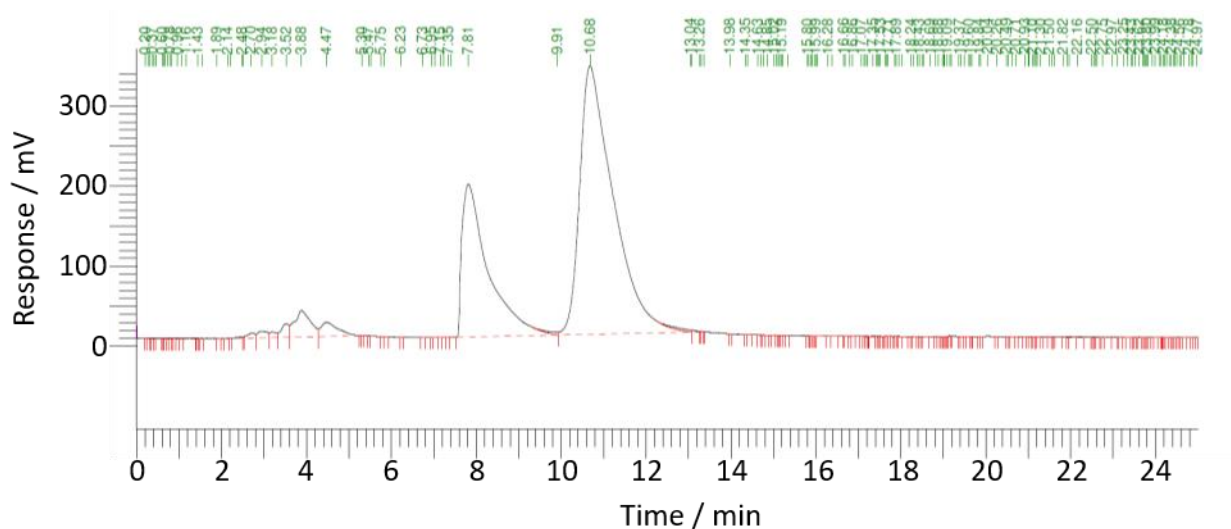

**Figure S43.** Chromatogram obtained for chiral HPLC of **NPB** showing two peaks with areas in a ratio of 31:69.

**Table S1.** Chiral HPLC report.

| Time / min    | Area / uV*sec | Height / uV | Area / % | Adjusted Amount |
|---------------|---------------|-------------|----------|-----------------|
| 7.812         | 8170220.61    | 190748.16   | 30.66    | 8.1702          |
| 10.678        | 18476170.23   | 334872.27   | 69.34    | 18.4762         |
| <b>Total:</b> | 26646390.83   | 525620.43   | 100.00   | 26.6464         |

## 5. Additional NMR Spectroscopic Measurements

### 5.1 *In Situ* Formation of Diazinane 8

Upon subjecting (*R*)/(*S*)-**6** to cycloaddition reaction conditions, compound **7** is obtained. The  $^1\text{H}$  NMR spectra shows (Figure S44) that this reaction halts the Cope rearrangement observed in (*R*)/(*S*)-**6** whilst also symmetrising the structure overall by forming a second cyclopropyl ring. The fluxional cage is easily regenerated in a two-step transformation through compound **8** (evidence in the crude NMR), which undergoes cycloreversion upon oxidation with  $\text{CuCl}_2$ . A  $^1\text{H}$  NMR spectrum of the crude mixture of **8** displays characteristic proton resonances of the diazinane C-H (labelled as positions 1 and 2) and N-H environments (labelled as positions 3 and 4).

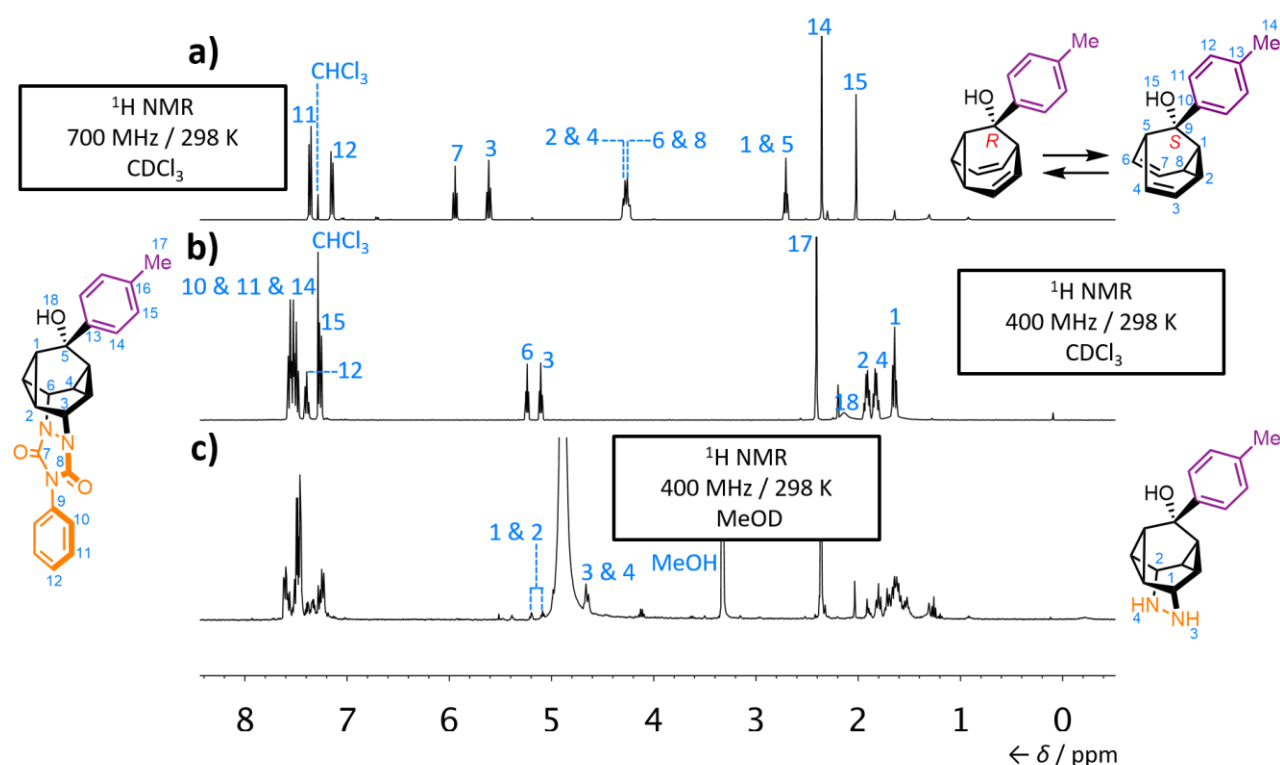

**Figure S44.** Partial  $^1\text{H}$  NMR spectra of (a) (*R*)/(*S*)-**6**, (b) **7** and (c) **8**. The spectra show the stopping and re-starting of the Cope rearrangement observed in (*R*)/(*S*)-**6**.



## 5.2 Desymmetrisation of the Barbaralyl Core

Compound **3** is an achiral molecule as a result of an internal mirror plane ( $\sigma_v''$ ) (in the plane of the carbonyl bridge), however another orthogonal mirror plane ( $\sigma_v'$ ) is effectively present on the timescale of NMR measurements as a result of the rapid dynamics of the barbaralane core. Due to this apparent mirror plane ( $\sigma_v'$ ), the exchanging cyclopropane and olefinic environments appear as a broad singlet. In contrast, a 9-BB-type compound (e.g., (*R*)/(*S*)-**1**) lacks the internal mirror plane ( $\sigma_v''$ ) – however, the orthogonal mirror plane ( $\sigma_v'$ ) arising from rapid Cope rearrangement is retained. The removal of the  $\sigma_v''$  mirror plane results in the desymmetrisation of the molecule and subsequently the cyclopropane and olefinic environments split into two sets of two inequivalent peaks remaining in the fast-exchange regime (Figure S45).

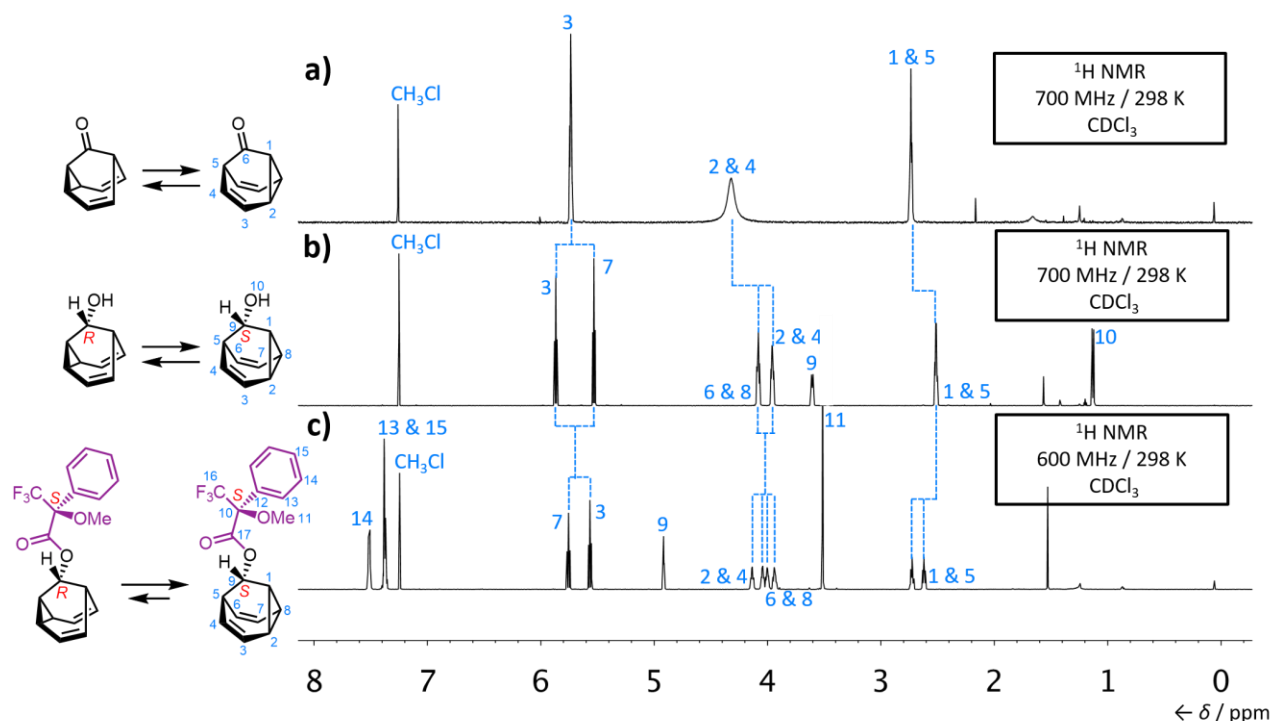

**Figure S45.** Partial  $^1\text{H}$  NMR spectra of (a) **3**, (b) (*R*)/(*S*)-**1** and (c) (*R,S*)/(*S,S*)-**2**. The spectra show the sequential desymmetrisation of the barbaralyl core with environments splitting as they become magnetically inequivalent.

Covalently linking a chiral tether to the barbaralane core (as observed with  $(R,S)/(S,S)$ -**2**) removes the remaining mirror plane ( $\sigma'_v$ ) and entirely desymmetrises the core so that every proton on the barbaralane core has its own unique chemical environment. For example, the broad singlet present in Figure S45a labelled as position 2 changes into four distinctly split peaks in Figure S45c. Although, desymmetrisation takes place, the chiral tether molecules still exist in solution as a mixture of interconverting nondegenerate diastereoisomers. Since  $(R)/(S)$ -**1** in the solution state interconverts between two degenerate isomers, the equilibrium constant,  $K$ , is 1.0 and therefore the averaged peaks are exactly halfway between the two individual structures in exchange.<sup>3,8</sup> For example, the proton signal corresponding to position 2 and 4 is exactly halfway between the signals for 2 and 4 if two structures were fixed in either state. Similarly, the positions of the four peaks (2, 4, 6, and 8) of  $(R,S)/(S,S)$ -**2** (Figure S45c) represent an average of the interconverting pair of stereoisomers, but weighted by the equilibrium distribution of isomers (where  $K \neq 1$ ). The same type of symmetry breaking is observed for  $(R,R)/(S,R)$ -**2**,  $(S,S)/(R,S)$ -**5**,  $(R,S)/(R,R)$ -**5**, **L<sub>BB</sub>** and complexes  $(R,S)/(S,S)$ -**L<sub>BB</sub>**AuCl,  $(A,S,S)/(C,R,S)$ -**L<sub>BB</sub>**PdCl<sub>2</sub> and  $(C,R,S)$ -**L<sub>BB</sub>**RuCp(NCMe)·PF<sub>6</sub>.

### 5.1 Variable-Temperature (VT) NMR Spectroscopy of $(R,S)/(S,S)$ -**2**

In order to probe the equilibrium further, we recorded solution-phase <sup>1</sup>H and <sup>13</sup>C NMR spectra of covalently modified barbaralane  $(R,S)/(S,S)$ -**2** at low temperatures ranging from 296 K to 149 K (Figures S46 and S47). At room temperature, the diastereomers appear to exist in a ratio which is almost 1:1 of interconverting configurations, owing to the close proximity of the olefinic and cyclopropane chemical shifts (the proton environments labelled as 2, 4, 6 and 8). Cooling below the coalescence temperature separates these environments into the slow-exchange regime, so that chemical shifts are closer to those expected for a divinyl cyclopropane and for a *cis*-dialkylolefin. Analysis of the chemical shift variation as a function of temperature could have, in principle, allowed

quantitative evaluation of the kinetic and thermodynamic parameters determining the dynamic chirality of the carbon stereogenic centre of (*R,S*)/(*S,S*)-**2** if both isomers could be observed in slow exchange. But in the slow-exchange regime the equilibrium was deemed to shift almost entirely in preference of the thermodynamically favoured diastereoisomer (*S,S*)-**2** (Figure S46) on account of the shift in the Boltzmann distribution at low temperature. This result was confirmed by DFT calculations (see *In Silico* Modelling, Section 8). Diastereoisomers (*R,S*)/(*S,S*)-**2** are computed to have a ground state energy difference of 6.8 kJ·mol<sup>-1</sup> with the lower energy isomer (*S,S*)-**2** being thermodynamically favoured. Overall, introduction of a covalently bound chiral tether of fixed absolute configuration allows the solution-state equilibrium to shift slightly in favour of the thermodynamically favoured configuration at room temperature. Upon cooling the solution-state equilibrium is shown to be dominated by the thermodynamically preferred diastereoisomer ((*S,S*)-**2**).

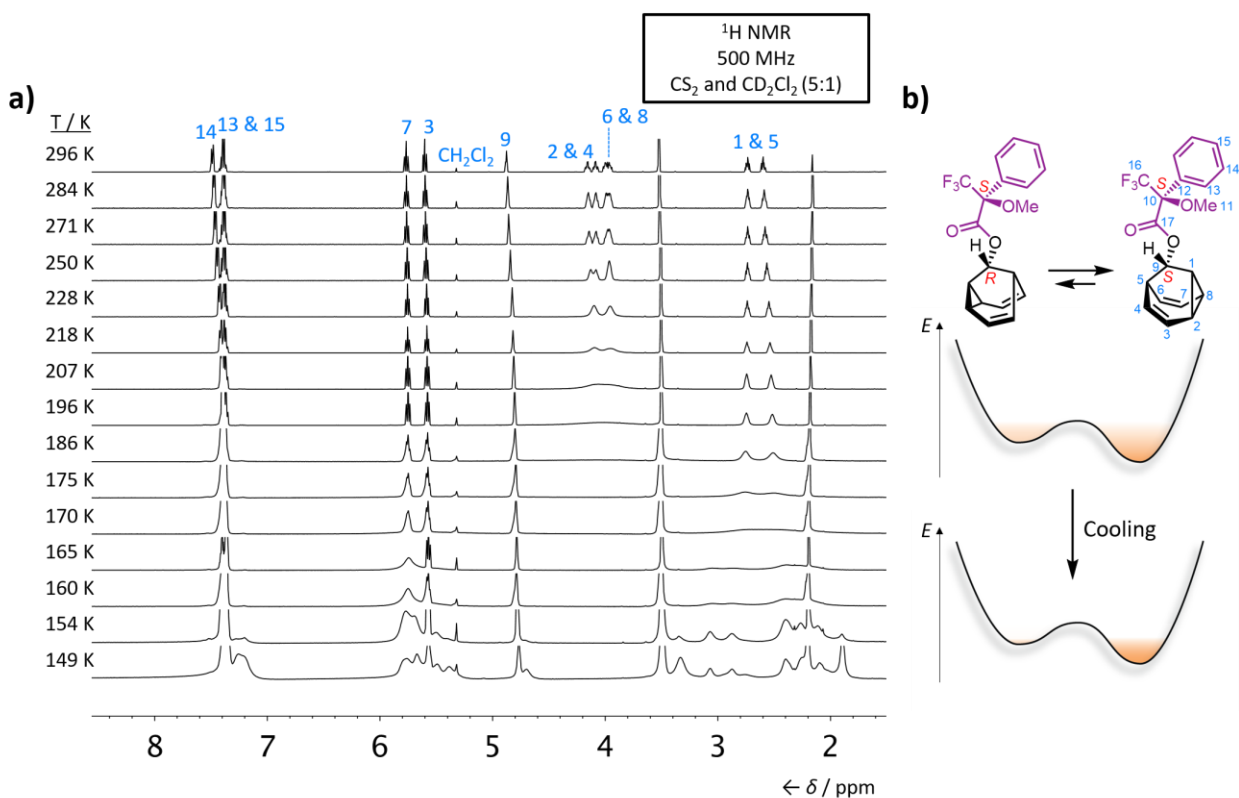

**Figure S46.** Partial <sup>1</sup>H VT NMR spectra of (a) (*R,S*)/(*S,S*)-**2** (296 K to 149 K) and (b) a schematic illustration of the change in equilibrium population on a simplified potential energy surface as the temperature decreases.

The barbaralanes undergo a rapid and reversible Cope rearrangement in solution. For example, diastereoisomer (*R,S*)-**2** is in fast exchange with isomer (*S,S*)-**2**, giving rise to a single set of resonances in the  $^{13}\text{C}$  NMR spectrum recorded at ambient temperature. The chemical shift of each nucleus is indicative of its time-averaged chemical environment. Upon reducing the temperature to 159 K (Figure S47), the equilibrium shifts in favour of diastereoisomer (*S,S*)-**2**. This is evidenced as the peaks corresponding to the olefinic and cyclopropane environments broaden into the base and re-emerge. For example, two of the olefinic and cyclopropane environments are  $\sim 70$  ppm at room temperature but at colder temperatures they have shifted to  $\sim 25$  ppm. Environments labelled as 1, 5, 3 and 7 also broaden into the baseline at higher temperatures and re-emerge at colder temperatures.

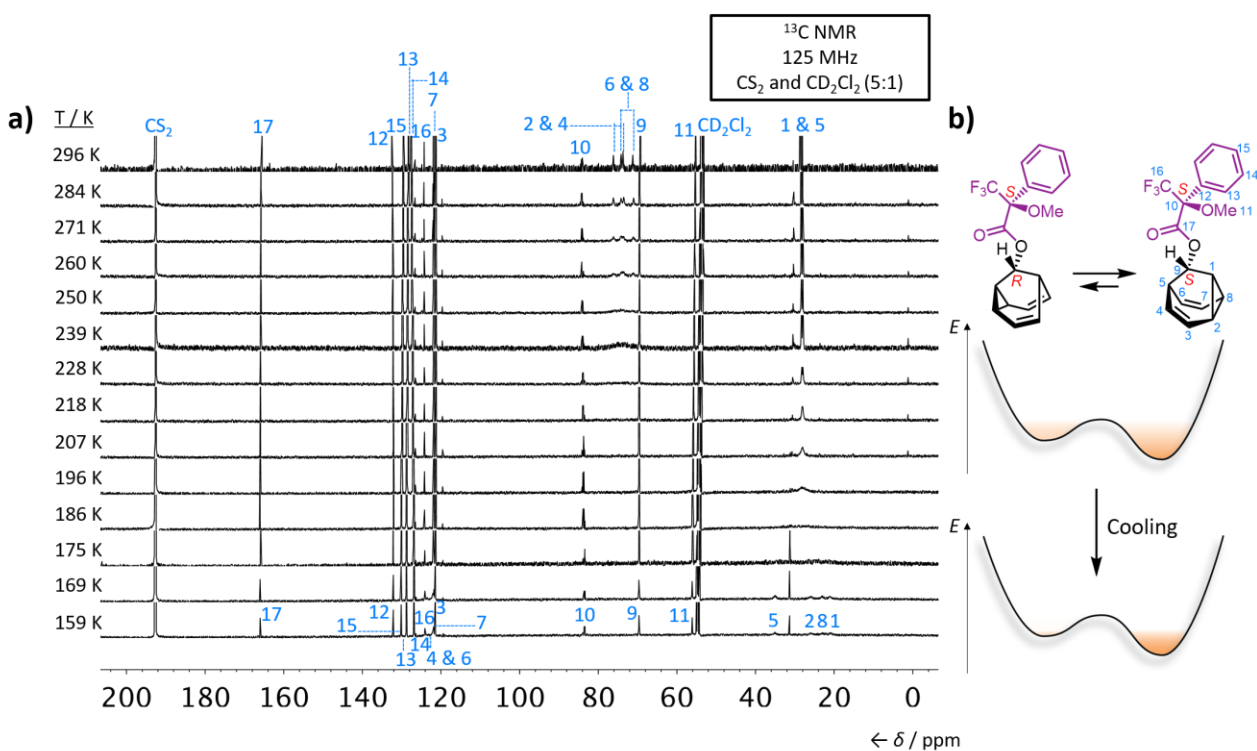

**Figure S47.** Partial  $^{13}\text{C}$  VT NMR spectra of (a) (*R,S*)/(*S,S*)-**2** (296 K to 159 K) and (b) a schematic illustration of the change in equilibrium population on a simplified potential energy surface as the temperature decreases.

#### 5.4 $^{13}\text{C}$ NMR Spectroscopic Comparison of (*R,S*)/(*S,S*)-**2**

The solid-state structures of (*R,R*)-**2** and (*S,S*)-**2** were probed further through  $^{13}\text{C}$  solid-state NMR (ssNMR) spectroscopy (Figure S48 and Table S2). ssNMR experiments were performed for (*R,R*)-**2** (Figure S48b). Comparison to the low-temperature solution-phase  $^{13}\text{C}$  NMR spectrum of (*S,S*)-**2** (Figure S48c) supports the assignment that the diastereoisomer with the same configuration at position 9 of the barbaralane and at chiral tether (*i.e.*, *R* and *R*) is the thermodynamically favoured diastereoisomer and that the equilibrium is slightly shifted in solution at room temperature but is dominant at low temperatures. Comparison of the simulated  $^{13}\text{C}$  NMR spectrum of (*R,R*)-**2** against the low-temperature solution-phase  $^{13}\text{C}$  NMR spectrum of (*S,S*)-**2** and the ssNMR of (*R,R*)-**2** also supports our conclusion. The two derivatives studied, (*S,S*)-**2** and (*R,R*)-**2**, are enantiomers and thus their NMR spectroscopic signals can be directly compared. The upfield (<100 ppm) resonances of the  $^{13}\text{C}$  ssNMR spectrum are well resolved. They match well with the experimental solution and simulated solid-state spectra (Figure S48), allowing for the reliable assignment of the upfield region of the spectra.

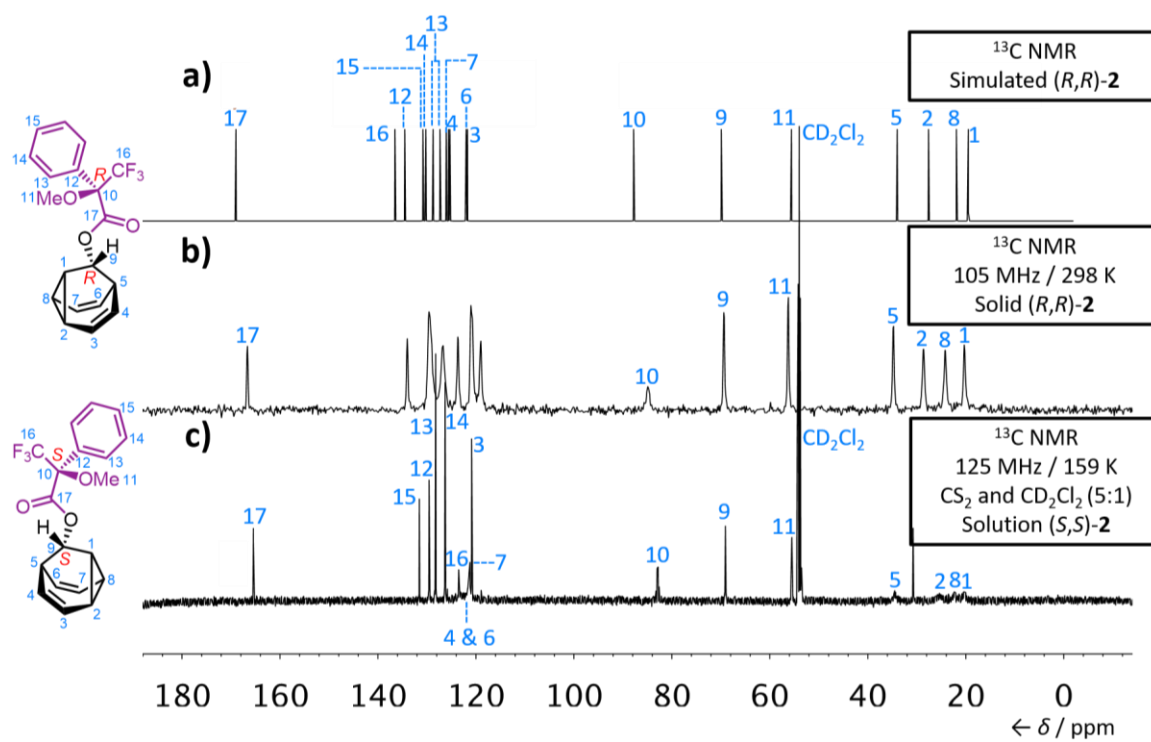

**Figure S48.** Comparison of  $^{13}\text{C}$  NMR spectra of  $(R,R)$ -2 and  $(S,S)$ -2 under different conditions: (a) the simulated solid-state spectrum of  $(R,S)$ -2, (b)  $(R,S)$ -2 in the solid state (as a powder) and (c)  $(S,S)$ -2 in a  $\text{CS}_2$ – $\text{CD}_2\text{Cl}_2$  (5:1) solution at 159 K.

**Table S2.** Comparison of solid-state calculated  $^{13}\text{C}$  NMR chemical shifts of (*R,R*)-**2** against solid-state experimental  $^{13}\text{C}$  NMR chemical shifts of (*R,R*)-**2** and solution-state experimental  $^{13}\text{C}$  NMR chemical shifts of (*S,S*)-**2**.

| Atom      | Solid-State<br>Calculated $^{13}\text{C}$ NMR<br>Chemical Shift ( $\delta$ )<br>( <i>R,R</i> )- <b>2</b> | Solid-State<br>Experimental $^{13}\text{C}$ NMR<br>Chemical Shift ( $\delta$ )<br>( <i>R,R</i> )- <b>2</b> | Solution-State<br>Experimental $^{13}\text{C}$ NMR<br>Chemical Shift ( $\delta$ )<br>( <i>S,S</i> )- <b>2</b> |
|-----------|----------------------------------------------------------------------------------------------------------|------------------------------------------------------------------------------------------------------------|---------------------------------------------------------------------------------------------------------------|
| 1 or 5'   | 20.52                                                                                                    | 20.30                                                                                                      | 20.52                                                                                                         |
| 2 or 4'   | 22.35                                                                                                    | 24.21                                                                                                      | 22.35                                                                                                         |
| 3 or 3'   | <i>a</i>                                                                                                 | <i>a</i>                                                                                                   | <i>a</i>                                                                                                      |
| 4 or 2'   | <i>a</i>                                                                                                 | <i>a</i>                                                                                                   | <i>a</i>                                                                                                      |
| 5 or 1'   | 34.50                                                                                                    | 34.79                                                                                                      | 34.50                                                                                                         |
| 6 or 8'   | <i>a</i>                                                                                                 | <i>a</i>                                                                                                   | <i>a</i>                                                                                                      |
| 7 or 7'   | <i>a</i>                                                                                                 | <i>a</i>                                                                                                   | <i>a</i>                                                                                                      |
| 8 or 6'   | 25.20                                                                                                    | 28.63                                                                                                      | 25.20                                                                                                         |
| 9 or 9'   | 69.07                                                                                                    | 69.37                                                                                                      | 69.07                                                                                                         |
| 10 or 10' | 165.43                                                                                                   | 166.66                                                                                                     | 165.43                                                                                                        |
| 11 or 11' | 83.02                                                                                                    | 84.90                                                                                                      | 83.02                                                                                                         |
| 12 or 12' | <i>a</i>                                                                                                 | <i>a</i>                                                                                                   | <i>a</i>                                                                                                      |
| 13 or 13' | <i>a</i>                                                                                                 | <i>a</i>                                                                                                   | <i>a</i>                                                                                                      |
| 14 or 14' | <i>a</i>                                                                                                 | <i>a</i>                                                                                                   | <i>a</i>                                                                                                      |
| 15 or 15' | <i>a</i>                                                                                                 | <i>a</i>                                                                                                   | <i>a</i>                                                                                                      |
| 16 or 16' | <i>a</i>                                                                                                 | <i>a</i>                                                                                                   | <i>a</i>                                                                                                      |
| 17 or 17' | 55.52                                                                                                    | 56.25                                                                                                      | 55.52                                                                                                         |

<sup>a</sup>Unable to assign unambiguously.

## 5.5 Dynamic NMR Spectroscopy of (*A,S,S*)/(*C,R,S*)-**L<sub>BB</sub>PdCl<sub>2</sub>**

At room temperature, several of the proton resonances of **L<sub>BB</sub>PdCl<sub>2</sub>** are broadened due to exchange. The signals were resolved by recording a series of low-temperature  $^1\text{H}$  NMR spectra (Figure S49). Signals corresponding to the two stereoisomers are present in an equilibrium ratio of 3:4 ( $K = 1.33$ ) at 240 K. These signals were assigned to (*A,S,S*)-**L<sub>BB</sub>PdCl<sub>2</sub>** and (*C,R,S*)-**L<sub>BB</sub>PdCl<sub>2</sub>**, respectively, on the basis of the energetic preference predicted by DFT (see *In Silico* Modelling, Section 8). The Gibbs energy difference at 240 K was calculated using the equation  $\Delta G = -RT\ln K$ . A 2D EXSY NMR spectrum acquired at 240 K (Figure S50) also allowed the rearrangement rate to be measured. The ratio of the on-diagonal signals to off-diagonal signals  $[(I_{AA}+I_{BB})/(I_{AB}+I_{BA})]$  is 3.19 when using

a mixing time  $\tau_m = 200$  ms, corresponding to a rate of  $6.5 \text{ s}^{-1}$ . The free energy of activation was then calculated by applying the Eyring equation.

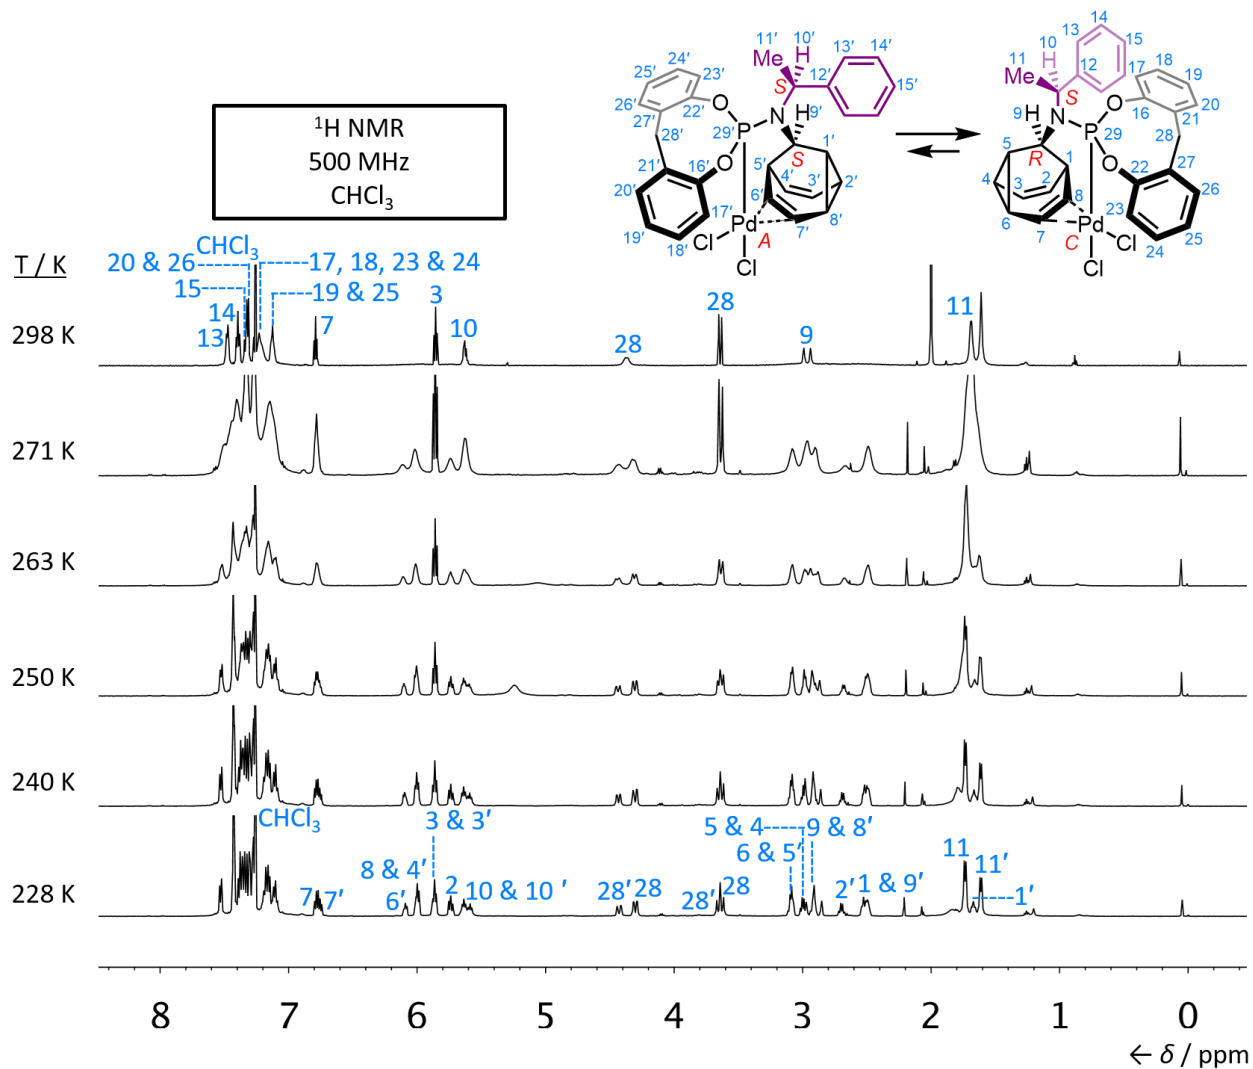

**Figure S49.** Partial <sup>1</sup>H VT NMR spectra of (A,S,S)/(C,R,S)-L<sub>BB</sub>PdCl<sub>2</sub> (298 K to 228 K). The spectra at 298 K show that the diastereoisomers are in fast exchange, whereas at 228 K the diastereoisomers enter the slow-exchange regime and are in a ratio of 1.3:1 of (C,R,S)-L<sub>BB</sub>PdCl<sub>2</sub> to (A,S,S)-L<sub>BB</sub>PdCl<sub>2</sub>.



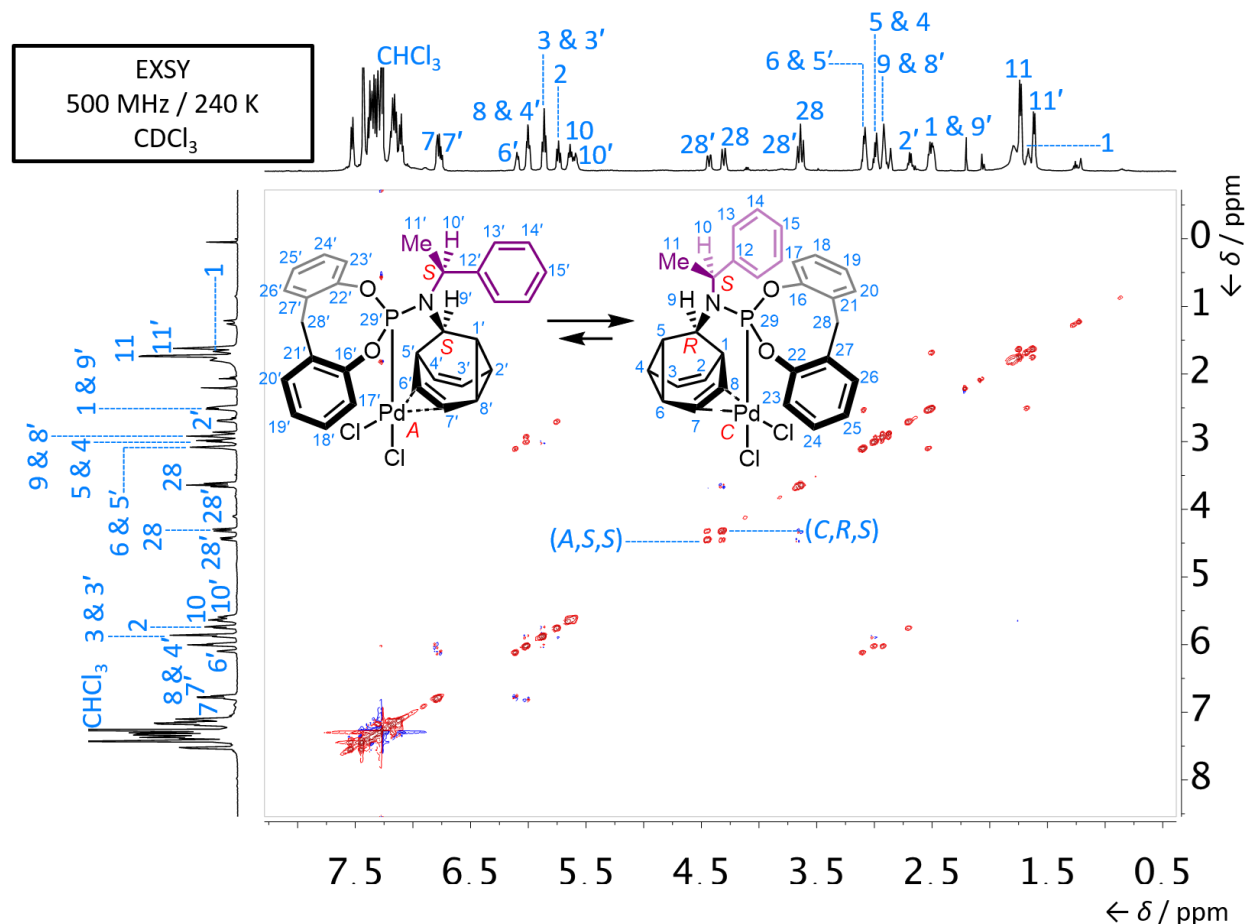

**Figure S50.** Partial EXSY NMR spectrum of  $(A,S,S)/(C,R,S)\text{-L}_{\text{BB}}\text{PdCl}_2$  with a mixing time  $\tau_m = 200$  ms at 240 K. The spectrum shows the resonances between the  $(A,S,S)\text{-L}_{\text{BB}}\text{PdCl}_2$  (minor) and  $(C,R,S)\text{-L}_{\text{BB}}\text{PdCl}_2$  (major) diastereoisomers.

## 5.6 Dynamic NMR Spectroscopy of $(C,R,S)\text{-L}_{\text{BB}}\text{RuCp}(\text{NCMe})\cdot\text{PF}_6$

In order to determine the dynamic stereoisomerisation rate of  $\text{L}_{\text{BB}}\text{RuCp}(\text{NCMe})\cdot\text{PF}_6$  (Figure S51) we dissolved a crystalline sample of  $(C,R,S)\text{-L}_{\text{BB}}\text{RuCp}(\text{NCMe})\cdot\text{PF}_6$  in  $\text{CDCl}_3$  at 298 K where the equilibrium was established over a period of several minutes. A 4:1 equilibrium mixture of  $(C,R,S)\text{-L}_{\text{BB}}\text{RuCp}(\text{NCMe})\cdot\text{PF}_6$  and  $(A,S,S)\text{-L}_{\text{BB}}\text{RuCp}(\text{NCMe})\cdot\text{PF}_6$  is obtained. The rate of exchange was measured by recording sequential  $^1\text{H}$  NMR spectra for a freshly dissolved sample of  $(C,R,S)\text{-L}_{\text{BB}}\text{RuCp}(\text{NCMe})\cdot\text{PF}_6$  in  $\text{CDCl}_3$  at 298 K. Assuming a first-order process with rate-limiting dissociation of  $\text{MeCN}$ , the rate was estimated (see Figure 5d in the main text) as the gradient of a straight line fitted to a plot of natural logarithm of the peak intensity against time, giving an observed

rate constant  $k_{\text{obs}}$  of  $2.56 \times 10^{-3} \text{ s}^{-1} \pm 10\%$ . Using the Eyring equation, this rate corresponds to a free energy of activation  $\Delta G^\ddagger$  of  $87.8 \text{ kJ}\cdot\text{mol}^{-1}$ .

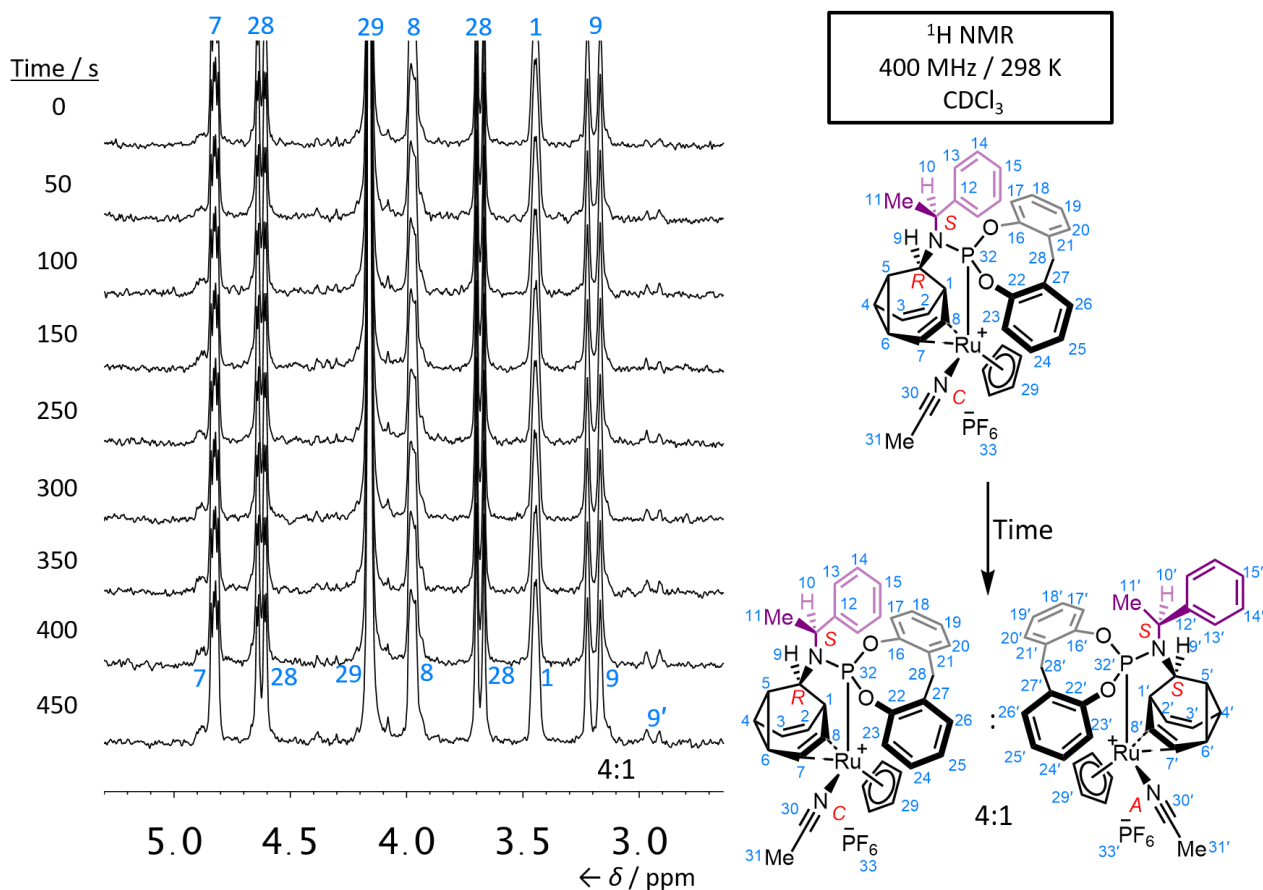

**Figure S51.** Partial  $^1\text{H}$  NMR spectra (400 MHz,  $\text{CDCl}_3$ , 298 K) of  $\text{L}_{\text{BB}}\text{RuCp}(\text{NCMe})\cdot\text{PF}_6$  obtained by acquiring spectra sequentially immediately after dissolving a crystalline sample of  $(C,R,S)\text{-L}_{\text{BB}}\text{RuCp}(\text{NCMe})\cdot\text{PF}_6$ . The growth of the signal at 2.9 ppm shows the equilibration to form  $(A,S,S)\text{-L}_{\text{BB}}\text{RuCp}(\text{NCMe})\cdot\text{PF}_6$ .

In order to determine the rate of MeCN exchange, the MeCN ligand of  $\text{L}_{\text{BB}}\text{RuCp}(\text{NCMe})\cdot\text{PF}_6$  was exchanged for  $\text{CD}_3\text{CN}$  by dissolving 4.6 mg of the complex in  $\text{CDCl}_3$  (0.6 mL) containing a drop of  $\text{CD}_3\text{CN}$  and standing overnight before evaporating solvent under reduced pressure. The resulting  $\text{L}_{\text{BB}}\text{RuCp}(\text{NCCD}_3)\cdot\text{PF}_6$  complex was then dissolved in  $\text{CDCl}_3$  (0.6 mL) at 298 K. A solution of MeCN (3.5 mg,  $\sim 15$  equiv.) in  $\text{CDCl}_3$  (0.1 mL) was added and rapidly mixed before a series of sequential  $^1\text{H}$  NMR spectra were recorded (Figure S52).

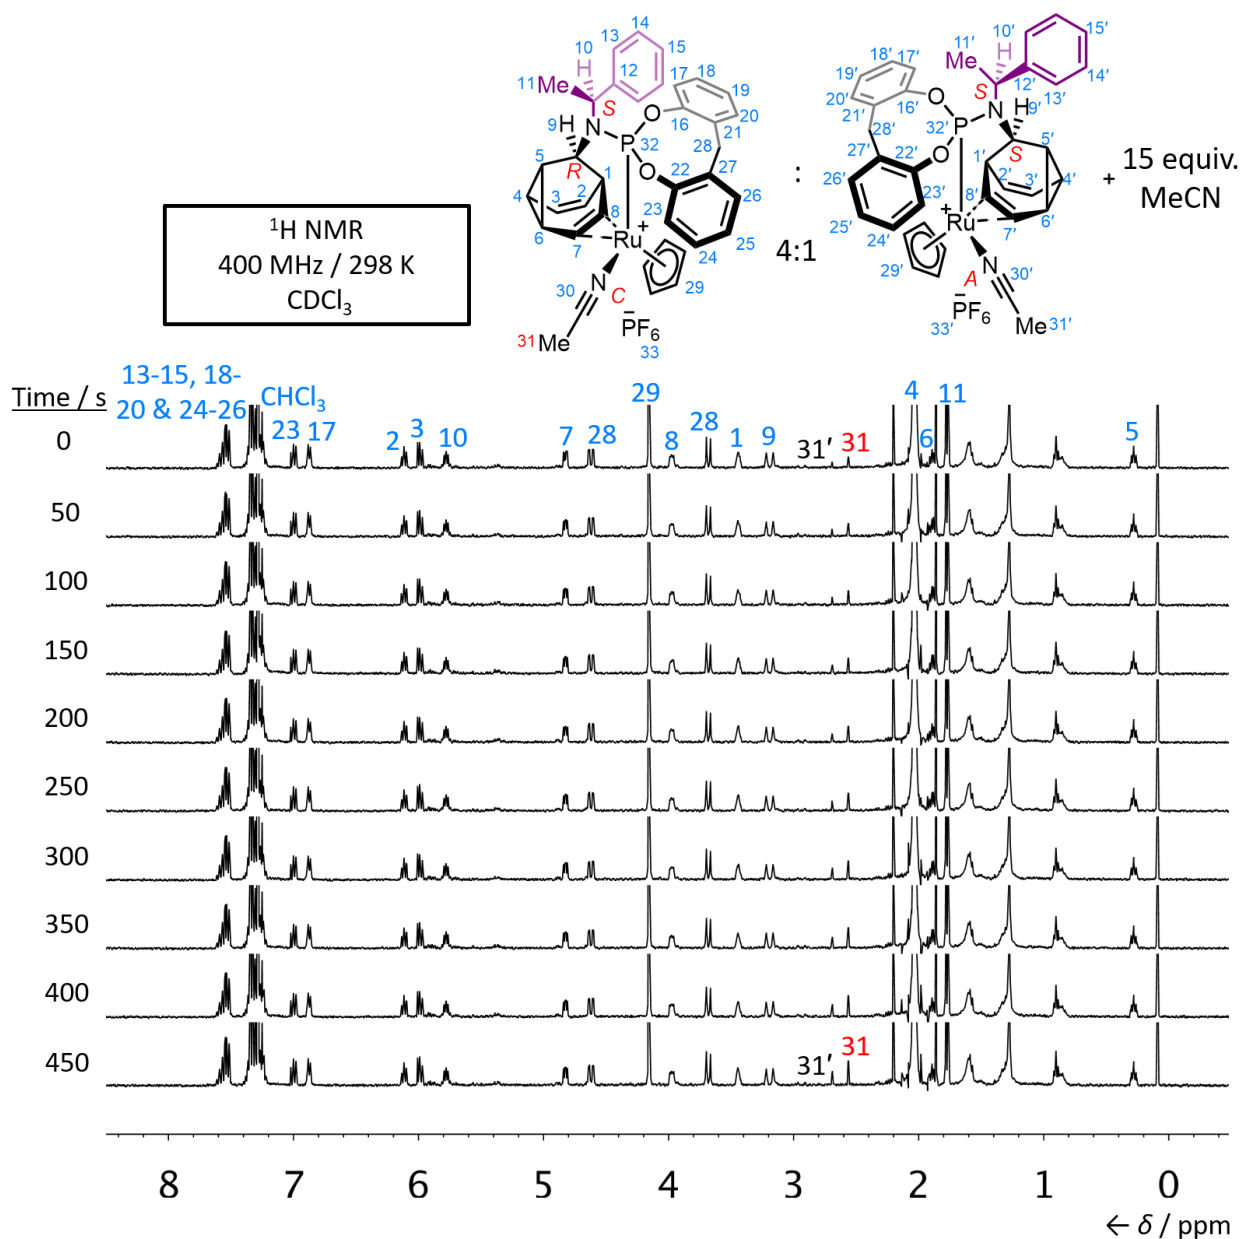

**Figure S52.** Partial <sup>1</sup>H NMR spectra of a 4:1 equilibrium mixture of (C,R,S)-L<sub>BB</sub>RuCp(NCCD<sub>3</sub>)·PF<sub>6</sub> and (A,S,S)-L<sub>BB</sub>RuCp(NCCD<sub>3</sub>)·PF<sub>6</sub> immediately after the addition of 15 equiv. MeCN showing the increase in the intensity of signals (31 and 31') corresponding to coordinated MeCN. Note: Although the spectra show a 4:1 equilibrium mixture of (C,R,S)-L<sub>BB</sub>RuCp(NCCD<sub>3</sub>)·PF<sub>6</sub> and (A,S,S)-L<sub>BB</sub>RuCp(NCCD<sub>3</sub>)·PF<sub>6</sub>, only the assignment of the major diastereoisomer ((C,R,S)-L<sub>BB</sub>RuCp(NCCD<sub>3</sub>)·PF<sub>6</sub>) is shown (blue and red labels), with the exception bar the signal corresponding to 31' (black label).

The growth in the signals corresponding to non-deuterated MeCN proton environments of (C,R,S)-L<sub>BB</sub>RuCp(NCMe)·PF<sub>6</sub> (H<sub>31</sub>) and (A,S,S)-L<sub>BB</sub>RuCp(NCMe)·PF<sub>6</sub> (H<sub>31'</sub>) was monitored over several minutes. Assuming first-order processes with rate-limiting dissociation of CD<sub>3</sub>CN, rates were

estimated (Figure S53) as the gradients of straight lines fitted to plots of natural logarithm of the peak intensity against time, giving observed rate constants,  $k_{\text{obs}}$ , of  $1.27 \times 10^{-3} \text{ s}^{-1} \pm 10.7\%$  and  $1.45 \times 10^{-3} \text{ s}^{-1} \pm 13.5\%$  for  $(C,R,S)\text{-L}_{\text{BB}}\text{RuCp}(\text{NCMe})\cdot\text{PF}_6$  and  $(A,S,S)\text{-L}_{\text{BB}}\text{RuCp}(\text{NCMe})\cdot\text{PF}_6$ , respectively. Note that these two figures are within experimental error of one another and very close to the observed rate of dynamic stereoisomerisation. Using the Eyring equation, these rates corresponds to free energies of activation  $\Delta G^\ddagger$  of 89.5 and 89.2  $\text{kJ}\cdot\text{mol}^{-1}$  for  $(C,R,S)\text{-L}_{\text{BB}}\text{RuCp}(\text{NCMe})\cdot\text{PF}_6$  and  $(A,S,S)\text{-L}_{\text{BB}}\text{RuCp}(\text{NCMe})\cdot\text{PF}_6$ , respectively.

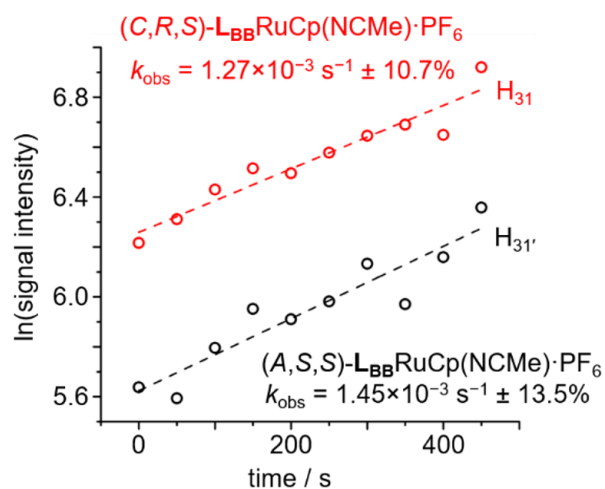

**Figure S53.** Plot of the natural logarithm of signal intensity for the two MeCN signals against time, showing the linear trend consistent with a first-order process with rate-limiting ligand dissociation.

## 6. Photoluminescence Quantum Yield (PLQY) Measurements of (C,R,S)-L<sub>BB</sub>RuCp(NCMe)·PF<sub>6</sub>

We tested the photoluminescence properties of (C,R,S)-L<sub>BB</sub>RuCp(NCMe)·PF<sub>6</sub>. The PLQY of (C,R,S)-L<sub>BB</sub>RuCp(NCMe)·PF<sub>6</sub> in chloroform solution was determined by comparison against a quinine sulphate in an 0.1 M aqueous H<sub>2</sub>SO<sub>4</sub> standard (Figure S54).<sup>9,10</sup> using the method recommended by Horiba Scientific.<sup>11</sup> A cuvette of path length 10 mm were used throughout the experiment. (C,R,S)-L<sub>BB</sub>RuCp(NCMe)·PF<sub>6</sub> (Figure S55) is weakly luminescent upon excitation at 365 nm, emitting at 450 nm. However, a very low quantum yield of <0.01 was determined (calculated value 0.002).

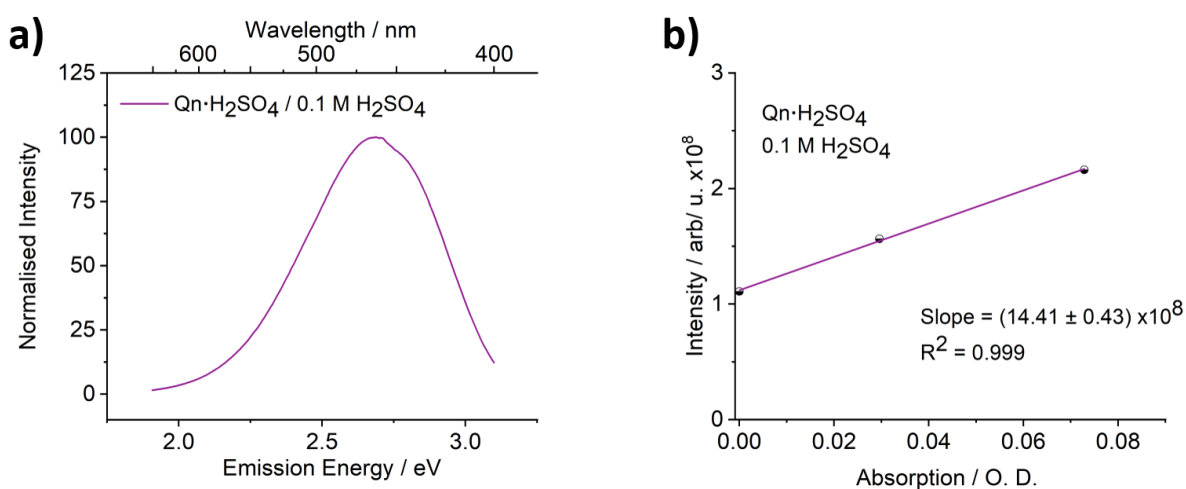

**Figure S54.** The (a) emission spectra and (b) emission vs. absorption slope of quinine sulphate in an 0.1 M aqueous H<sub>2</sub>SO<sub>4</sub> solution.

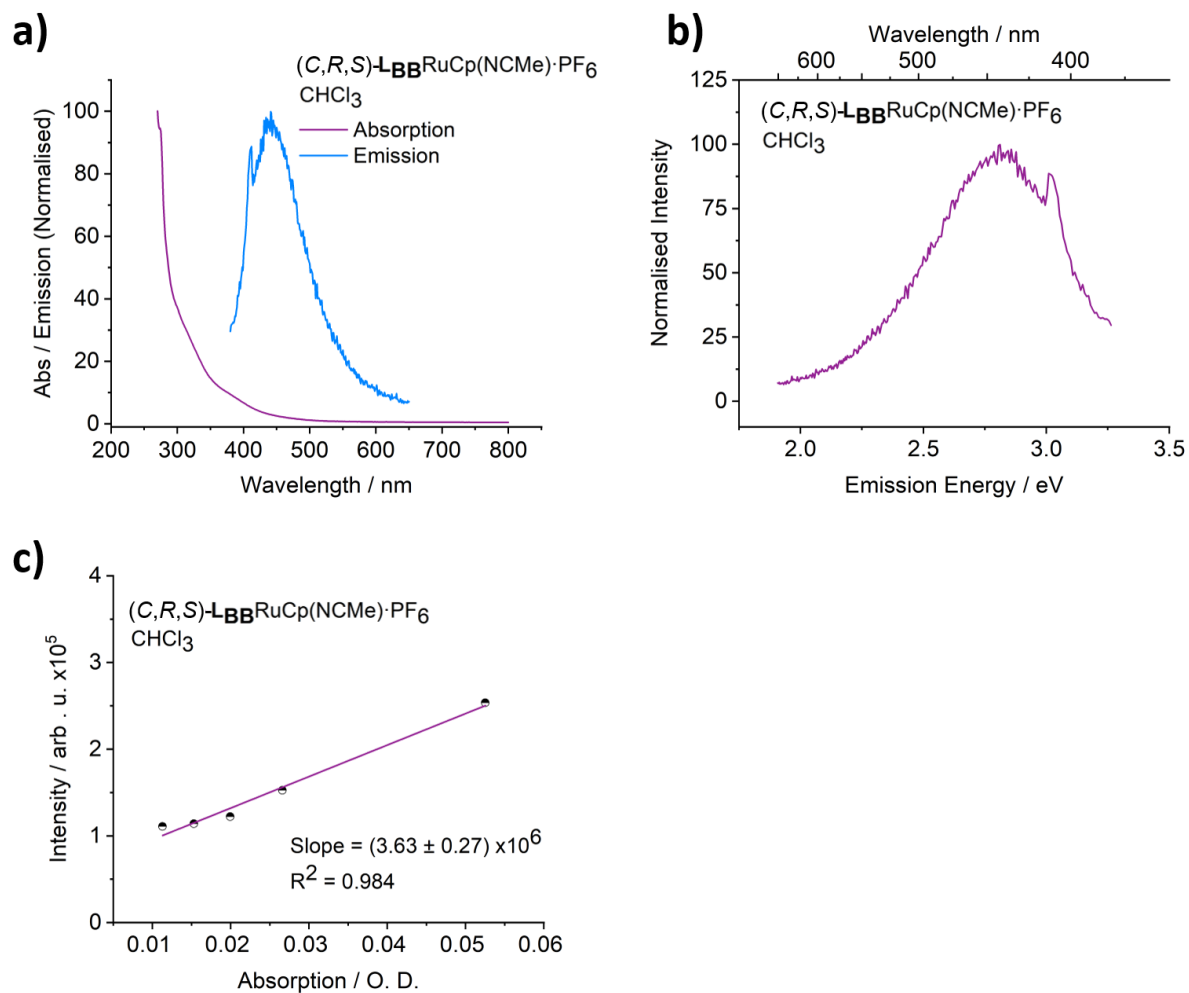

**Figure S55.** The (a) combined absorption and emission spectra (380  $\mu$ M,  $\lambda_{\text{ex}}$  = 365 nm), (b) emission spectra and (c) emission vs. absorption slope of (C,R,S)-**LBB**RuCp(NCMe)·PF<sub>6</sub> in CHCl<sub>3</sub>.

## 7. X-Ray Crystallographic Analysis

### 7.1 (*R*)/(*S*)-1

Crystals of (*R*)/(*S*)-1 suitable for X-ray diffraction were grown by slow evaporation of a saturated MeCN solution. Both enantiomers are present in the unit cell.

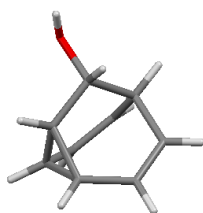

**Figure S56.** Solid-state structure of (*R*)/(*S*)-1.

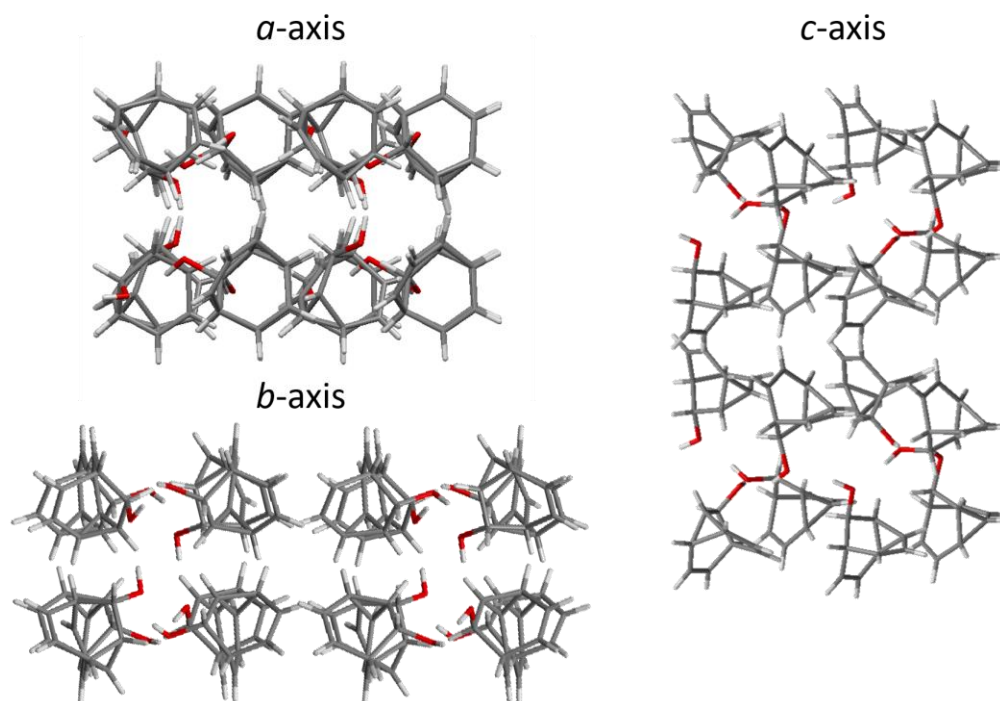

**Figure S57.** Solid-state superstructure of (*R*)/(*S*)-1 viewed along the three unit cell axes.

**Crystal data for (*R*)/(*S*)-1:** C<sub>9</sub>H<sub>10</sub>O, M = 134.17, crystal system = monoclinic, space group = C2/c, a = 21.0930(5), b = 12.8259(3), c = 20.9409(5) Å, β = 104.257(1)°, U = 5490.8(2) Å<sup>3</sup>, F(000) = 2304.0, Z = 32, D<sub>c</sub> = 1.298 mg m<sup>-3</sup>, μ = 0.653 mm<sup>-1</sup> (Mo-Kα, λ = 0.71073 Å), T = 120(1) K. 31201

reflections were collected yielding 5092 unique data ( $R_{\text{merge}} = 0.0345$ ). Final  $wR_2(F^2) = 0.0945$  for all data (377 refined parameters), conventional  $R_1(F) = 0.0360$  for 4356 reflections with  $I \geq 2\sigma$ , GOF = 1.037. Crystallographic data for this structure has been deposited within the Cambridge Crystallographic Data Centre as supplementary publication CCDC-2068012.

## 7.2 (*S,S*)-2

Crystals of (*S,S*)-2 suitable for X-ray diffraction were grown by slow evaporation of a saturated Et<sub>2</sub>O solution. See Figure 2 in the main text.

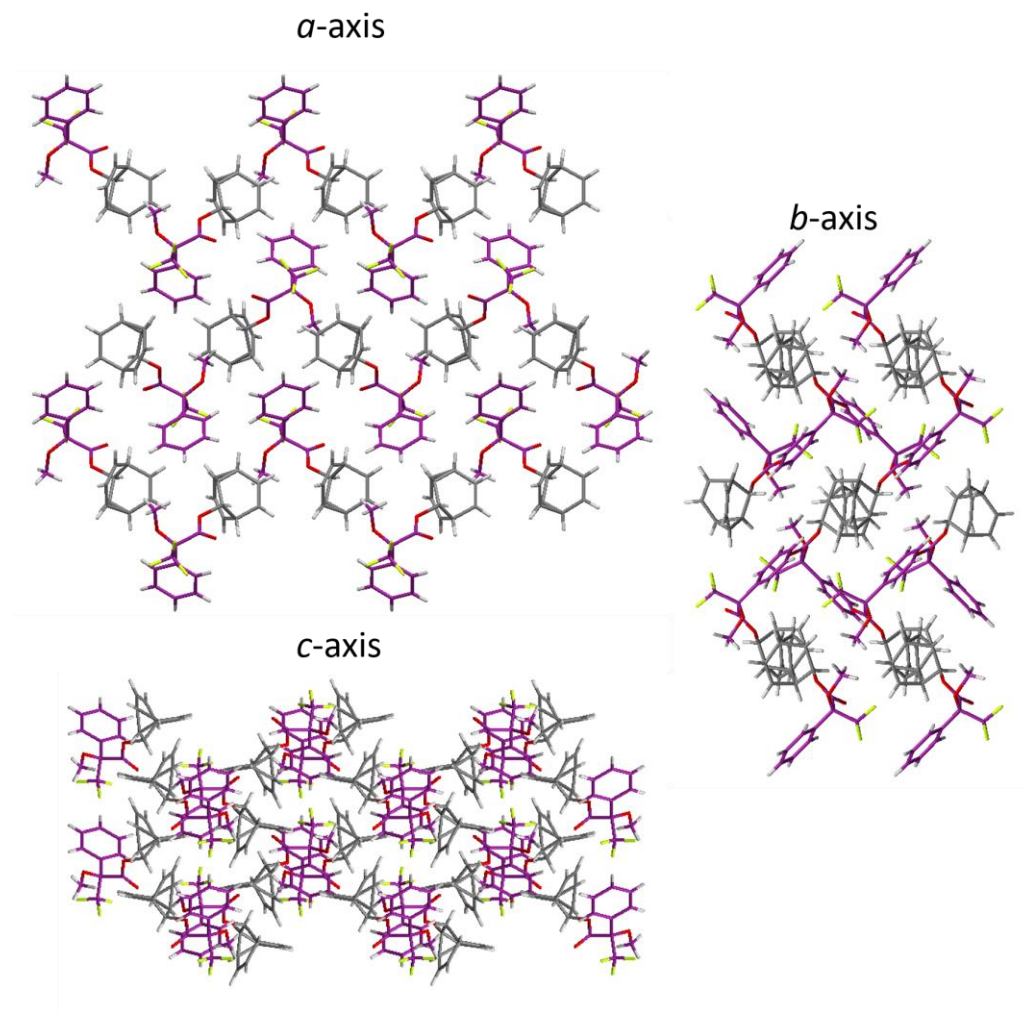

**Figure S58.** Solid-state superstructure of (*S,S*)-2 viewed along the three unit cell axes.



**Crystal data for (*S,S*)-2:** C<sub>19</sub>H<sub>17</sub>F<sub>3</sub>O<sub>3</sub>, M = 350.32, crystal system = orthorhombic, space group = P2<sub>1</sub>2<sub>1</sub>2<sub>1</sub>, a = 7.36678(15), b = 12.5886(2), c = 17.2671(3) Å, U = 1601.30(5) Å<sup>3</sup>, F(000) = 728.0, Z = 4, D<sub>c</sub> = 1.453 mg m<sup>-3</sup>, μ = 0.120 mm<sup>-1</sup> (Mo-Kα, λ = 0.71073 Å), T = 120(1) K. 26817 reflections were collected yielding 4452 unique data (R<sub>merg</sub> = 0.0387). Final wR<sub>2</sub>(F<sup>2</sup>) = 0.0744 for all data (294 refined parameters), conventional R<sub>1</sub>(F) = 0.0311 for 4133 reflections with I ≥ 2σ, GOF = 1.014. Flack parameter 0.0(2), Hooft parameter -0.01(19). Crystallographic data for the structure has been deposited within the Cambridge Crystallographic Data Centre as supplementary publication CCDC-2068015.

### 7.3 (*R,R*)-2

Crystals of (*R,R*)-2 suitable for X-ray diffraction were grown by slow evaporation of a saturated Et<sub>2</sub>O solution. See Figure 2 in the main text.

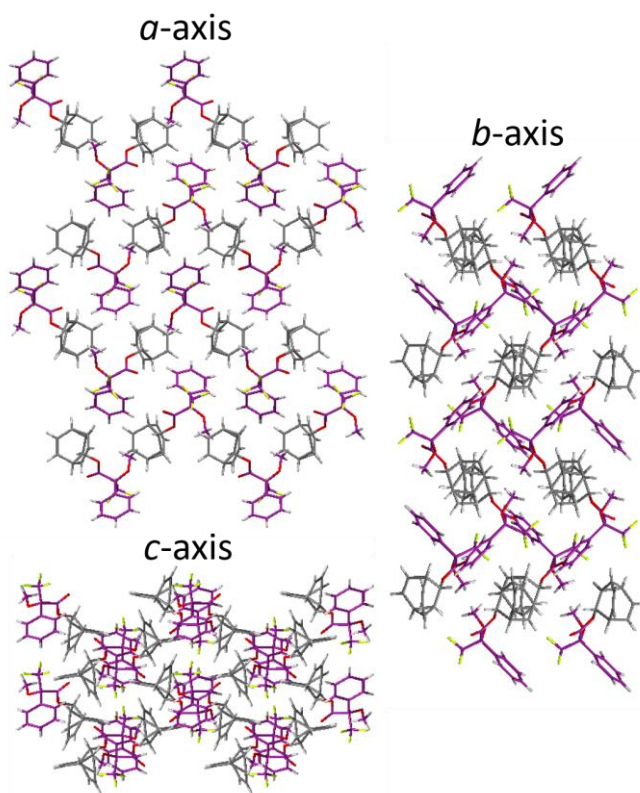

**Figure S59.** Solid-state superstructure of (*R,R*)-2 viewed along the three unit cell axes.

**Crystal data for (*R,R*)-2:** C<sub>19</sub>H<sub>17</sub>F<sub>3</sub>O<sub>3</sub>, M = 350.32, crystal system = orthorhombic, space group = P2<sub>1</sub>2<sub>1</sub>2<sub>1</sub>, a = 7.3559(3), b = 12.5594(5), c = 17.2298(7) Å, U = 1591.79(11) Å<sup>3</sup>, F(000) = 728.0, Z = 4, D<sub>c</sub> = 1.462 mg m<sup>-3</sup>, μ = 0.121 mm<sup>-1</sup> (Mo-Kα, λ = 0.71073 Å), T = 120(1) K. 34205 reflections were collected yielding 4434 unique data (R<sub>merg</sub> = 0.0342). Final wR<sub>2</sub>(F<sup>2</sup>) = 0.0759 for all data (294 refined parameters), conventional R<sub>1</sub>(F) = 0.0309 for 4069 reflections with I ≥ 2σ, GOF = 1.051. Flack parameter -0.1(1), Hooft parameter -0.1(1). Crystallographic data for the structure has been deposited within the Cambridge Crystallographic Data Centre as supplementary publication CCDC-2068016.

#### 7.4 (*R,R*)/(*S,S*)-4

Crystals of (*R,R*)/(*S,S*)-4 suitable for X-ray diffraction were grown by slow cooling of a hot and saturated MeCN solution. See Figure 2 in the main text.

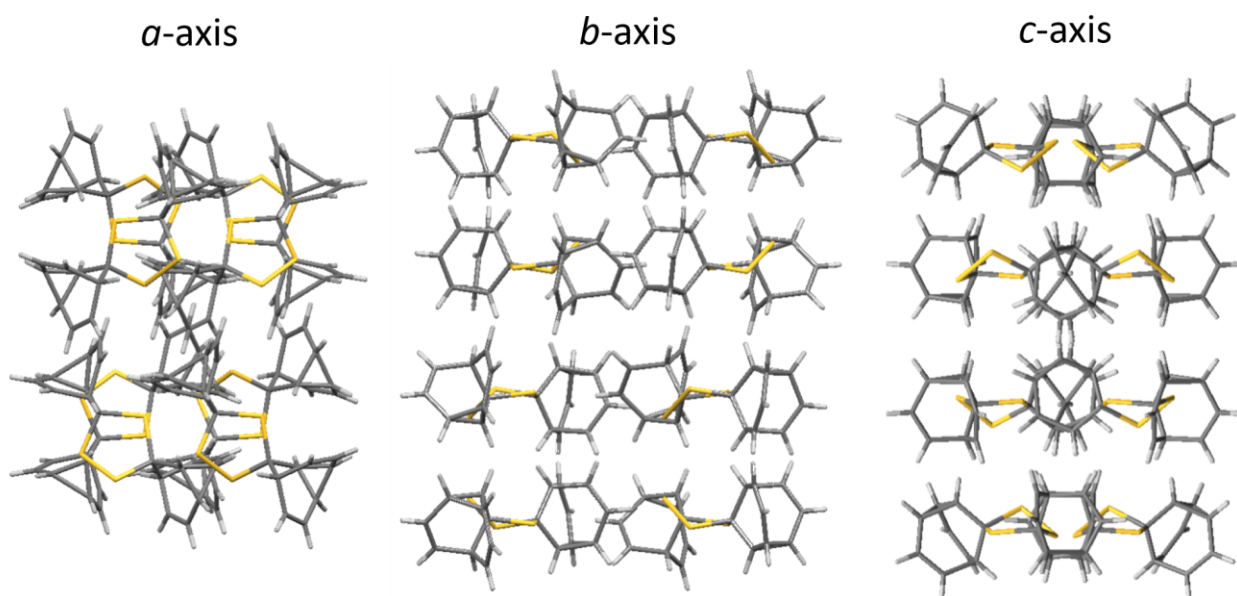

**Figure S60.** Solid-state superstructure of (*R,R*)/(*S,S*)-4 viewed along the three unit cell axes.

**Crystal data for (*R,R*)/(*S,S*)-4:** C<sub>18</sub>H<sub>16</sub>S<sub>3</sub>, M = 328.49, crystal system = orthorhombic, space group = Pbcn, a = 20.4767(4), b = 9.3487(2), c = 15.5799(3) Å, U = 2982.5(1) Å<sup>3</sup>, F(000) = 1376.0, Z = 8,

$D_c = 1.463 \text{ mg m}^{-3}$ ,  $\mu = 0.486 \text{ mm}^{-1}$  (Mo-K $\alpha$ ,  $\lambda = 0.71073 \text{ \AA}$ ),  $T = 120(1) \text{ K}$ . 27741 reflections were collected yielding 3964 unique data ( $R_{\text{merge}} = 0.0572$ ). Final  $wR_2(F^2) = 0.1187$  for all data (190 refined parameters), conventional  $R_1(F) = 0.0432$  for 3198 reflections with  $I \geq 2\sigma$ , GOF = 1.038. Crystallographic data for this structure has been deposited within the Cambridge Crystallographic Data Centre as supplementary publication CCDC-2068013.

## 7.5 7

Crystals of **7** suitable for X-ray diffraction were grown by slow cooling of a hot and saturated MeCN solution. See Figure 2 in the main text.

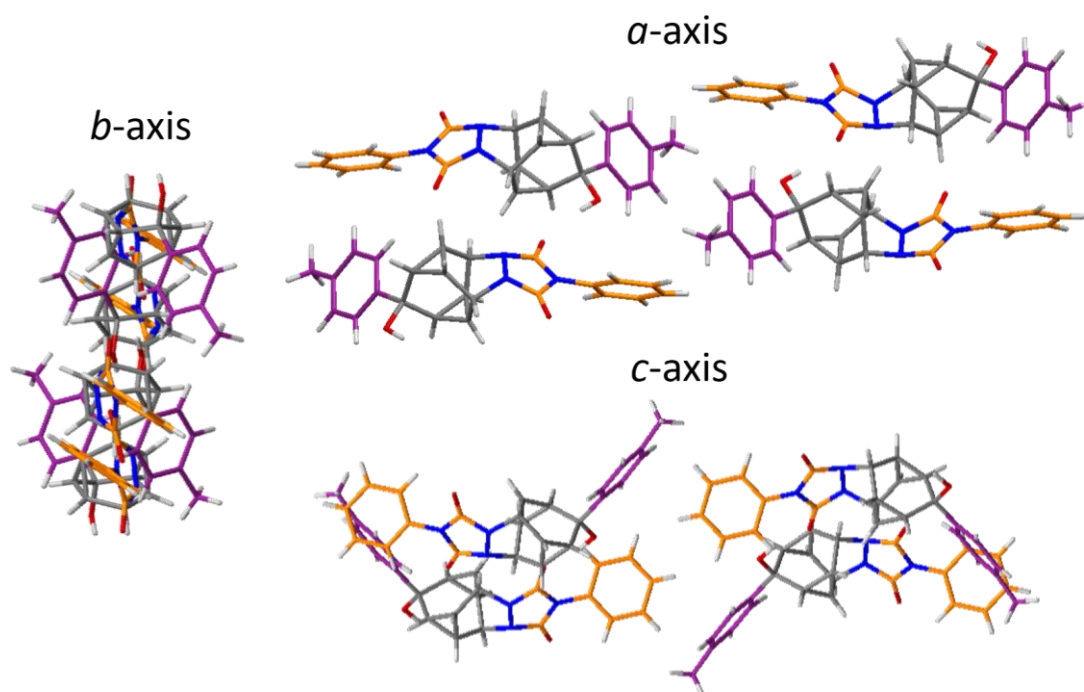

**Figure S63.** Solid-state superstructure of **7** viewed along the three unit cell axes.

**Crystal data for 7:**  $C_{24}H_{21}N_3O_3$ ,  $M = 399.44$ , crystal system = monoclinic, space group =  $P2_1/n$ ,  $a = 6.2961(4)$ ,  $b = 30.3288(13)$ ,  $c = 9.9483(7) \text{ \AA}$ ,  $\beta = 98.960(6)^\circ$ ,  $U = 1876.48(19) \text{ \AA}^3$ ,  $F(000) = 840.0$ ,  $Z = 4$ ,  $D_c = 1.414 \text{ mg m}^{-3}$ ,  $\mu = 0.095 \text{ mm}^{-1}$  (Mo-K $\alpha$ ,  $\lambda = 0.71073 \text{ \AA}$ ),  $T = 120(1) \text{ K}$ . 14914 reflections

were collected yielding 3695 unique data ( $R_{\text{merge}} = 0.1009$ ). Final  $wR_2(F^2) = 0.1484$  for all data (347 refined parameters), conventional  $R_1(F) = 0.0586$  for 2113 reflections with  $I \geq 2\sigma$ , GOF = 1.039. Crystallographic data for the structure has been deposited within the Cambridge Crystallographic Data Centre as supplementary publication CCDC-2068017.

## 7.6 S1

Crystals of **S1** suitable for X-ray diffraction were grown by slow evaporation of a saturated  $\text{CH}_2\text{Cl}_2$  solution.

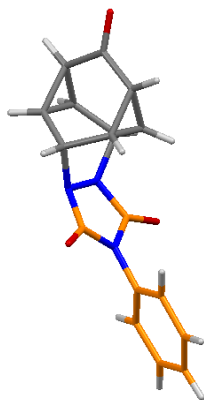

**Figure S64.** Solid-state structure of **S1**.

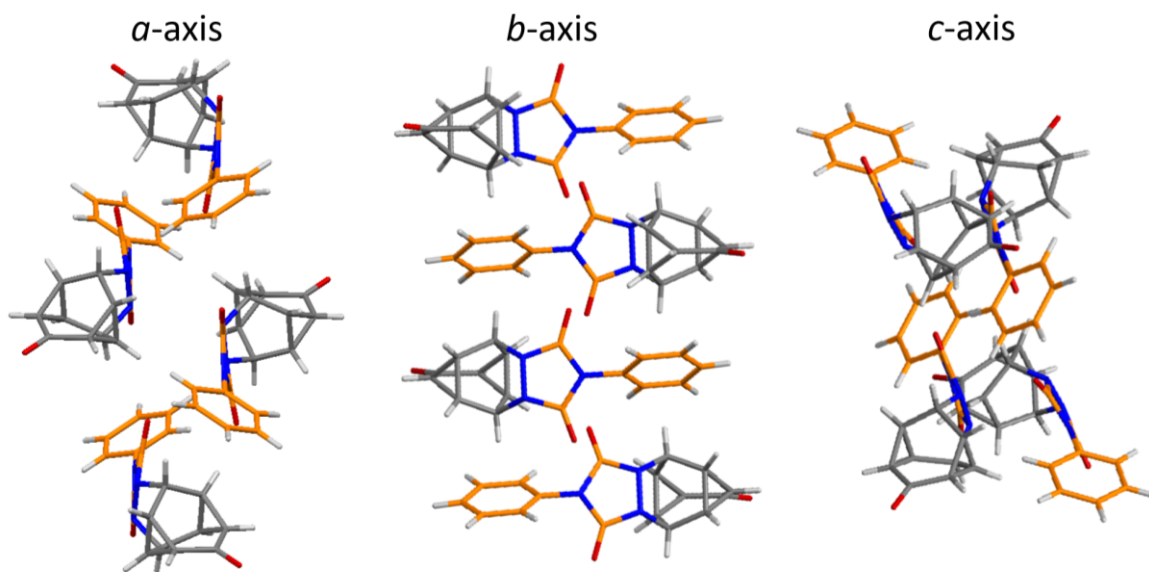

**Figure S65.** Solid-state superstructure of **S1** viewed along the three unit cell axes.

**Crystal data for S1:**  $C_{17}H_{13}N_3O_3$ ,  $M = 307.30$ , crystal system = monoclinic, space group =  $P2_1/n$ ,  $a = 14.3555(4)$ ,  $b = 6.2807(2)$ ,  $c = 16.0289(4)$  Å,  $\beta = 110.898(1)^\circ$ ,  $U = 1350.14(7)$  Å<sup>3</sup>,  $F(000) = 640.0$ ,  $Z = 4$ ,  $D_c = 1.512$  mg m<sup>-3</sup>,  $\mu = 0.107$  mm<sup>-1</sup> (Mo-K $\alpha$ ,  $\lambda = 0.71073$  Å),  $T = 120(1)$  K. 23181 reflections were collected yielding 3883 unique data ( $R_{\text{merge}} = 0.0441$ ). Final  $wR_2(F^2) = 0.0993$  for all data (260 refined parameters), conventional  $R_1(F) = 0.0381$  for 3549 reflections with  $I \geq 2\sigma$ , GOF = 1.061. Crystallographic data for the structure has been deposited within the Cambridge Crystallographic Data Centre as supplementary publication CCDC-2068019.

## 7.7 (*R,S*)-5

Crystals of (*R,S*)-5 suitable for X-ray diffraction were grown by slow cooling of the sample at a temperature of 5 °C from room temperature and were transferred to the diffractometer by a ‘dry ice’ technique. See Figure 2 in the main text.

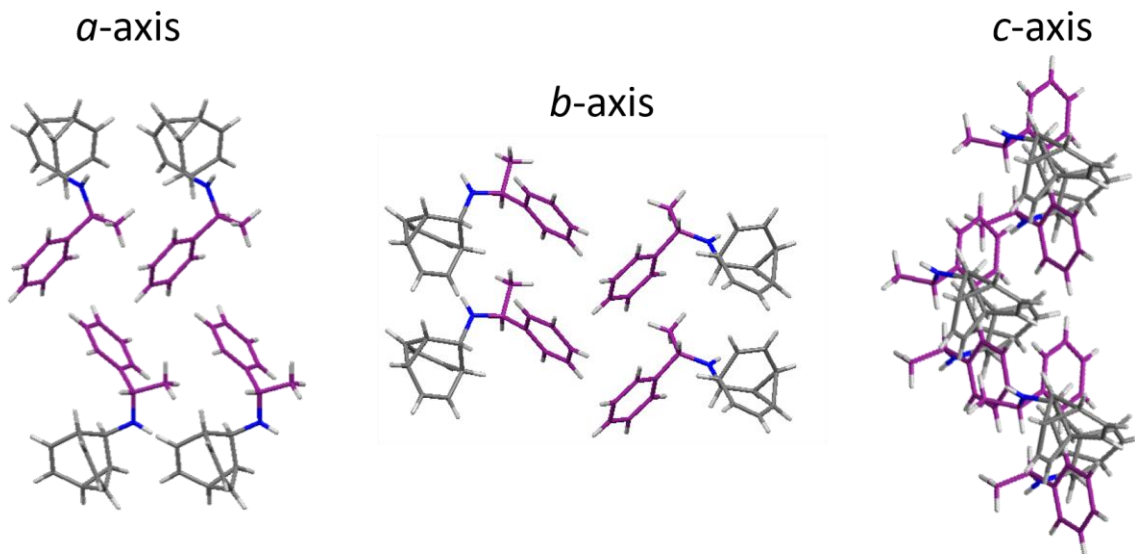

**Figure S66.** Solid-state superstructure of (*R,S*)-5 viewed along the three unit cell axes.

**Crystal data for (*S,R*)-5:**  $C_{17}H_{19}N$ ,  $M = 237.33$ , crystal system = triclinic, space group =  $P1$ ,  $a = 6.1684(9)$ ,  $b = 6.3485(9)$ ,  $c = 28.326(4)$  Å,  $\alpha = 84.356(4)$ ,  $\beta = 104.257(1)$ ,  $\gamma = 61.967(4)^\circ$ ,  $U =$

974.4(2) Å<sup>3</sup>, F(000) = 384.0, Z = 3, D<sub>c</sub> = 1.213 mg m<sup>-3</sup>, μ = 0.070 mm<sup>-1</sup> ( Mo-Kα, λ = 0.71073 Å), T = 120(1) K. 16714 reflections were collected yielding 7522 unique data (R<sub>merg</sub> = 0.1671). Final wR<sub>2</sub>(F<sup>2</sup>) = 0.1735 for all data (490 refined parameters), conventional R<sub>1</sub>(F) = 0.0797 for 2845 reflections with I ≥ 2σ, GOF = 0.912. Crystallographic data for the structure has been deposited within the Cambridge Crystallographic Data Centre as supplementary publication CCDC-2068015.

### 7.8 (A,S,S)/(C,R,S)-L<sub>BB</sub>PdCl<sub>2</sub>

Crystals of (A,S,S)/(C,R,S)-L<sub>BB</sub>PdCl<sub>2</sub> suitable for X-ray diffraction were grown by slow evaporation of a saturated EtOAc solution. See Figure 5 in the main text. The unit cell contains four independent molecules – two near-identical conformers of (A,S,S)-L<sub>BB</sub>PdCl<sub>2</sub> and two near-identical conformers of (C,R,S)-L<sub>BB</sub>PdCl<sub>2</sub>.

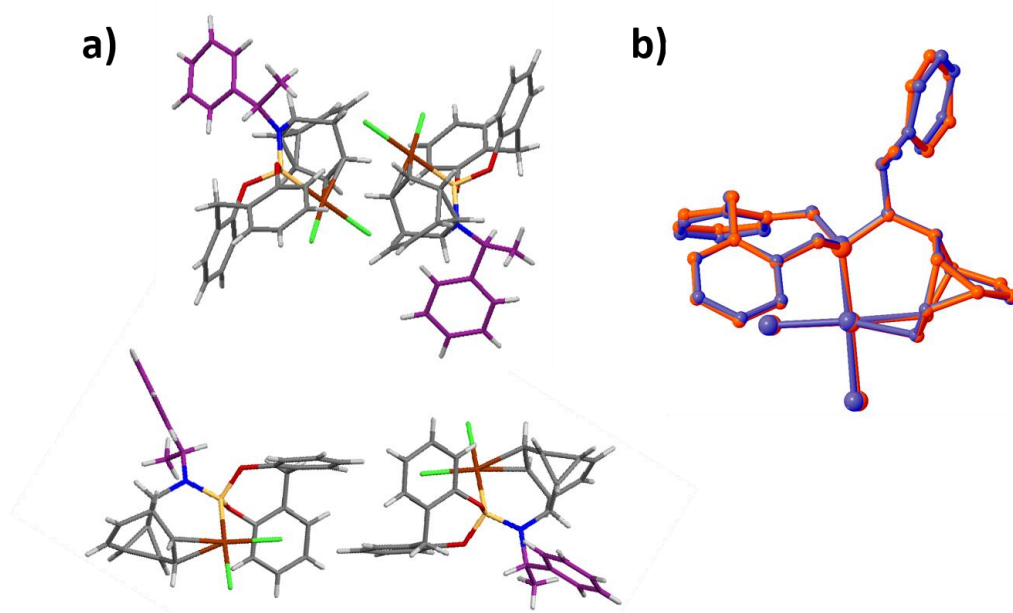

**Figure S67.** Solid-state structure of (a) the two near-identical conformers of (A,S,S)-L<sub>BB</sub>PdCl<sub>2</sub> as well as the two near-identical conformers of (C,R,S)-L<sub>BB</sub>PdCl<sub>2</sub> and (b) an overlay of two of the near-identical conformers of (C,R,S)-L<sub>BB</sub>PdCl<sub>2</sub> showing the similarity of their geometries.

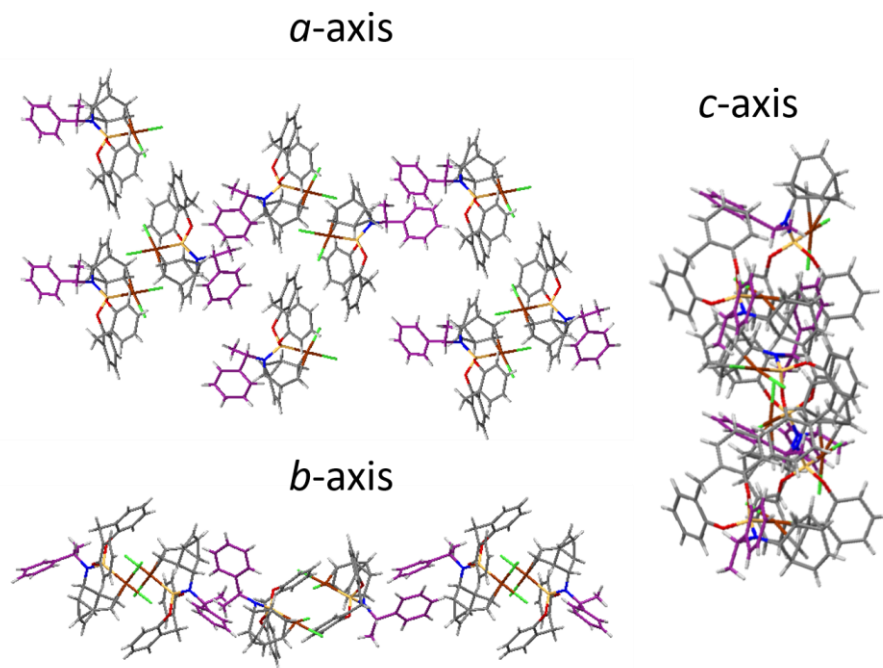

**Figure S68.** Solid-state superstructure of (A,S,S)/(C,R,S)-L<sub>BB</sub>PdCl<sub>2</sub> viewed along the three unit cell axes.

**Crystal data for (A,S,S)/(C,R,S)-L<sub>BB</sub>PdCl<sub>2</sub>:** C<sub>30</sub>H<sub>27</sub>Cl<sub>2</sub>NO<sub>2</sub>PPd × 0.625 C<sub>4</sub>H<sub>8</sub>O<sub>2</sub>, M = 697.74, crystal system = triclinic, space group = P1, a = 9.2399(6), b = 12.7855(9), c = 28.2827(19) Å, α = 95.365(2), β = 98.805(2), γ = 110.791(2)°, U = 3047.1(4) Å<sup>3</sup>, F(000) = 1424.0, Z = 4, D<sub>c</sub> = 1.521 mg m<sup>-3</sup>, μ = 0.872 mm<sup>-1</sup> ( Mo-Kα, λ = 0.71073 Å), T = 120(1) K. 48567 reflections were collected yielding 27453 unique data (R<sub>merg</sub> = 0.0748). Final wR<sub>2</sub>(F<sup>2</sup>) = 0.1787 for all data (1500 refined parameters), conventional R<sub>1</sub>(F) = 0.0711 for 17333 reflections with I ≥ 2σ, GOF = 1.029. Flack parameter -0.01(2), Hooft parameter -0.03(2). Crystallographic data for the structure has been deposited within the Cambridge Crystallographic Data Centre as supplementary publication CCDC-2068019.

## 7.9 (C,R,S)-L<sub>BB</sub>RuCp(NCMe)·PF<sub>6</sub>

Crystals of (C,R,S)-L<sub>BB</sub>RuCp(NCMe)·PF<sub>6</sub> suitable for X-ray diffraction were grown by slow evaporation of a saturated CDCl<sub>3</sub> solution. See Figure 5 in the main text. A single configurational and conformational isomer, (C,R,S)-L<sub>BB</sub>RuCp(NCMe)·PF<sub>6</sub> is present in the unit cell, as a solvate with CDCl<sub>3</sub>.

**Distorted square pyramidal geometry:** Taking the centroid of the  $\mu^5$ -Cp ligand as a coordinated pseudo-atom, the complex can be treated as a distorted square pyramid. The bond angles between the apical Cp and each of the four ligands at the base of the square pyramid are all  $>115^\circ$  (Cp-Ru-P  $131.0^\circ$ , Cp-Ru-N  $121.0^\circ$ , Cp-Ru-C7  $119.8^\circ$ , and Cp-Ru-C8  $120.6^\circ$ ), whereas the bond angles between adjacent coordination sites at the base of the square pyramid are all  $<85^\circ$  (P-Ru-N  $84.4^\circ$ , N-Ru-C7  $83.7^\circ$ , C7-Ru-C8  $36.2^\circ$ , and C8-Ru-P  $80.2^\circ$ ).



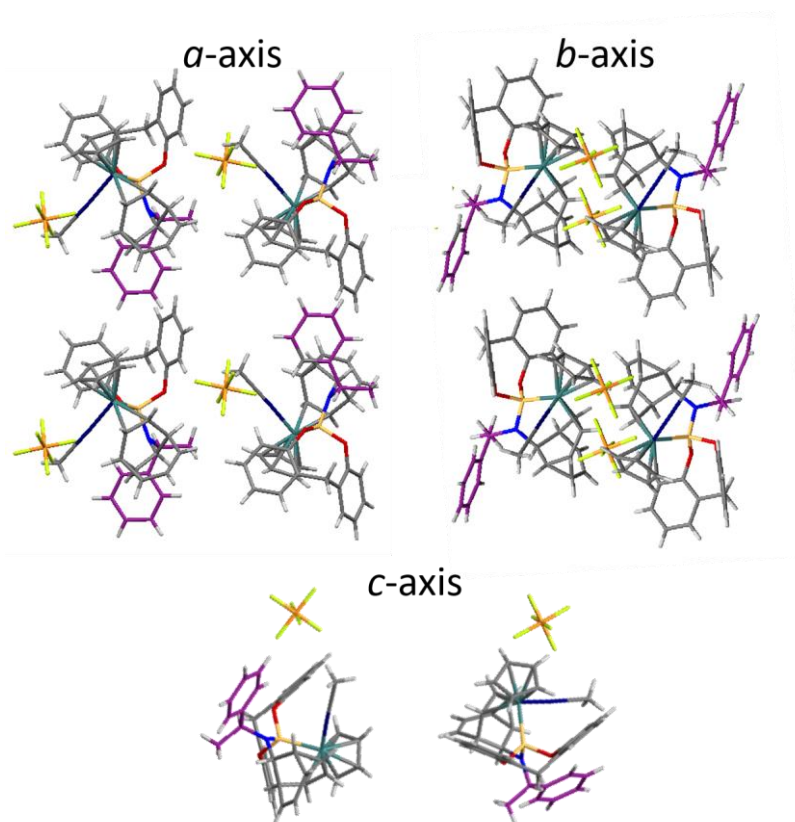

**Figure S69.** Solid-state superstructure of (C,R,S)-LBBRuCp(NCMe)·PF<sub>6</sub> viewed along the three unit cell axes.

**Crystal data for (C,R,S)-LBBRuCp(NCMe)·PF<sub>6</sub>:** C<sub>38</sub>H<sub>37</sub>Cl<sub>3</sub>F<sub>6</sub>N<sub>2</sub>O<sub>2</sub>P<sub>2</sub>Ru, M = 937.05, crystal system = monoclinic, space group = P2<sub>1</sub>, a = 8.7715(3), b = 18.7732(6), c = 11.9803(4) Å, β = 100.055(1)°, U = 1942.48(11) Å<sup>3</sup>, F(000) = 948.0, Z = 2, D<sub>c</sub> = 1.602 mg m<sup>-3</sup>, μ = 0.759 mm<sup>-1</sup> (Mo-Kα, λ = 0.71073 Å), T = 120(1) K. 47392 reflections were collected yielding 11303 unique data (R<sub>merge</sub> = 0.0405). Final wR<sub>2</sub>(F<sup>2</sup>) = 0.0613 for all data (489 refined parameters), conventional R<sub>1</sub>(F) = 0.0300 for 10892 reflections with I ≥ 2σ, GOF = 1.039. Flack parameter -0.019(8), Hooft parameter --0.032(8). Crystallographic data for the structure has been deposited within the Cambridge Crystallographic Data Centre as supplementary publication CCDC-2068020.

## 8. *In Silico* Modelling

### 8.1 General Methods

DFT calculations were carried out in Gaussian 16.<sup>13</sup> The minimum energy ground state (GS) and transition state (TS) geometries of the barbaralanes were optimised using the range-separated hybrid (RSH) general gradient approximation GGA functional  $\omega$ B97XD.<sup>14</sup> Calculations were performed using the 6-311++G(d,p) basis set for H, C, N, O, P, Cl atoms and SDD basis set for Ru, Au, and Pd atoms, with a polarizable continuum model (PCM) using the integral equation formalism variant (IEFPCM) to approximate CS<sub>2</sub> as the solvent. Frequency calculations were carried out to confirm the lack of any negative vibrational frequencies for GS structures and to confirm their presence for TS structures (saddle points). Intrinsic reaction coordinate (IRC) calculations were performed to confirm that TS geometries identified lie on a potential surface linking the barbaralane GS structures. For compounds with rotatable single bonds that lead to several accessible conformers, (**2**, **8**, and **LBB**) a molecular mechanics conformational search was performed to identify conformers that were then taken on to DFT optimisation. Conformational searches were performed using confab<sup>15</sup> implemented in Open Babel,<sup>16,17</sup> identifying all conformers predicted to be within 15 kcal·mol<sup>-1</sup> of the lowest energy structure and with a root mean square deviation of 1.0 Å or more. The conformers of **LBB**AuCl screened by DFT were prepared manually based on the conformers of **LBB** identified by confab. The energy gaps ( $\Delta E_{\text{calc}}$ ) reported in Table S3 correspond to the difference in energy between the lowest energy conformers of the relevant configurational isomers. The relative energies given for **LBB**RuCp<sup>+</sup> and **LBB**RuCp(NCMe)<sup>+</sup> take into account the calculated energy of a ‘free’ MeCN molecule at infinite separation in the ligand coordination reaction of **LBB**RuCp<sup>+</sup> and MeCN giving **LBB**RuCp(NCMe)<sup>+</sup>.

**Table S3.** Energetics of the dynamic sp<sup>3</sup>-carbon equilibria.<sup>a</sup>

| Compounds                                             | Major Isomer <sup>b</sup>            | $\Delta E_{calc}$ ( $\Delta G_{exp}$ ) kJ·mol <sup>-1</sup> | $\Delta E_{calc}^{\ddagger}$ ( $\Delta G_{exp}^{\ddagger}$ ) kJ·mol <sup>-1</sup> |
|-------------------------------------------------------|--------------------------------------|-------------------------------------------------------------|-----------------------------------------------------------------------------------|
| <b>BB</b>                                             | — <sup>c</sup>                       | 0.0 (0.0 <sup>d</sup> )                                     | 41.8 (32.3 <sup>d</sup> )                                                         |
| <b>1</b>                                              | — <sup>e</sup>                       | 0.0                                                         | 41.8                                                                              |
| ( <i>R,S</i> )/( <i>S,S</i> )- <b>2</b>               | <i>S,S</i>                           | 6.8                                                         | 42.9                                                                              |
| <b>3</b>                                              | — <sup>c</sup>                       | 0.0 (0.0 <sup>f</sup> )                                     | 51.7 (42.8 <sup>f</sup> )                                                         |
| ( <i>R,R</i> )/ <i>meso</i> /( <i>S,S</i> )- <b>4</b> | <i>S,S</i> / <i>R,R</i> <sup>g</sup> | 0.7                                                         | 41.3                                                                              |
| ( <i>R,S</i> )/( <i>S,S</i> )- <b>8</b>               | <i>R,S</i>                           | 3.1                                                         | 42.0                                                                              |
| <b>LBB</b>                                            | <i>S,S</i>                           | 14.4                                                        | 40.8                                                                              |
| <b>LBB</b> AuCl                                       | <i>R,S</i>                           | 3.4                                                         | 54.2                                                                              |
| <b>LBB</b> PdCl <sub>2</sub>                          | <i>C,R,S</i>                         | 0.9 (0.5 <sup>h</sup> )                                     | 62.1 (54.6 <sup>h</sup> )                                                         |
| <b>LBB</b> RuCp(NCMe) <sup>+</sup>                    | <i>C,R,S</i>                         | 6.7 (4.0 <sup>i</sup> )                                     | 97.3 <sup>j</sup> (87.8 <sup>i</sup> )                                            |
| <b>LBB</b> RuCp <sup>+</sup>                          | <i>S,S,S</i>                         | 19.9                                                        | 22.3                                                                              |

<sup>a</sup>The DFT calculated energies  $\Delta E_{calc}$  and  $\Delta E_{calc}^{\ddagger}$  were obtained using the  $\omega$ B97X-D functional, 6-311++G(d,p) basis set for H, C, N, O, P, Cl atoms and SDD basis set for Au, Pd, and Ru atoms, with a polarizable continuum model (PCM) using the integral equation formalism variant (IEFPCM) to approximate CS<sub>2</sub> as the solvent.  $\Delta G_{exp}$  and  $\Delta G_{exp}^{\ddagger}$  values were measured from NMR spectra in the slow exchange regime at suitably low temperatures. <sup>b</sup>Structure predicted to be lower in energy by DFT. <sup>c</sup>Achiral. <sup>d</sup>Reported in ref 18. <sup>e</sup>The two enantiomers are degenerate. <sup>f</sup>Reported in ref 19. <sup>g</sup>The enantiomeric pair of chiral stereoisomers is predicted to be lower in energy than the *meso* form. <sup>h</sup>Measured at 240 K in CDCl<sub>3</sub>. <sup>i</sup>Measured at 298 K in CDCl<sub>3</sub>. <sup>j</sup>Barrier predicted for coordination-coupled Cope (cc-Cope) rearrangement of **LBB**RuCp(NCMe)<sup>+</sup>.

First principles calculation for the NMR shifts the crystalline form of (*R,R*)-**2** was carried out using the GIPAW method implemented in CASTEP v17.2.<sup>20</sup> The calculation was performed using the PBE functional<sup>21</sup> and on-the-fly generated ultrasoft pseudopotentials with a cut-off energy of 600 eV. Geometry optimisation of all atomic positions was carried out with the centre of mass and unit cell parameters fixed at the values determined by single-crystal X-ray diffraction. Integrals were taken over the Brillouin zone using a Monkhorst-Pack grid with a maximum *k*-point sample spacing of 0.1 Å<sup>-1</sup>. <sup>13</sup>C isotropic shifts were obtained from calculations of NMR parameters from the optimised structures using tools relying on the magres file format and MagresPython library.<sup>22</sup>

## 8.2 Optimised Structures

Cartesian coordinates are given in Å, self-consistent field (SCF) energies ( $E$ ) are given in au, and imaginary vibrational frequencies ( $\nu$ ) are given in  $\text{cm}^{-1}$ .

**BB**

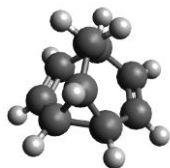

**Table S4.** Coordinates and energy for the optimised geometry of **BB**.

| $E = -348.891880507$ |          |          |          |
|----------------------|----------|----------|----------|
| Coordinates / Å      |          |          |          |
| Atom                 | x        | y        | z        |
| C                    | 0.26283  | 0.00002  | 1.56714  |
| C                    | 1.33011  | -0.00001 | 0.45155  |
| C                    | -1.11592 | 0.00002  | 0.95427  |
| C                    | -1.27200 | -0.78622 | -0.31916 |
| C                    | -0.10814 | -1.53378 | -0.81916 |
| C                    | 1.13281  | -1.20089 | -0.44632 |
| H                    | -0.28197 | -2.34535 | -1.51830 |
| H                    | 1.99888  | -1.72691 | -0.83420 |
| C                    | 1.13283  | 1.20086  | -0.44636 |
| H                    | 2.32946  | -0.00000 | 0.88919  |
| C                    | -0.10811 | 1.53376  | -0.81919 |
| H                    | 1.99892  | 1.72683  | -0.83425 |
| C                    | -1.27199 | 0.78624  | -0.31917 |
| H                    | -0.28192 | 2.34536  | -1.51829 |
| H                    | -1.95646 | -0.00003 | 1.63873  |
| H                    | -2.24529 | 1.21815  | -0.51838 |
| H                    | -2.24529 | 1.21813  | -0.51842 |
| H                    | 0.39453  | -0.88568 | 2.19615  |
| H                    | 0.39456  | 0.88576  | 2.19612  |

TS-BB

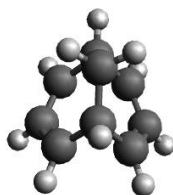

**Table S5.** Coordinates, energy, and imaginary vibrational frequency for the optimised geometry of TS-BB.

| $E = -348.875815248$ |          |          |          |
|----------------------|----------|----------|----------|
| $\nu = -406.10$      |          |          |          |
| Coordinates / Å      |          |          |          |
| Atom                 | x        | y        | z        |
| C                    | -0.00003 | -0.00083 | 1.60724  |
| C                    | -1.24234 | -0.00025 | 0.72750  |
| C                    | 1.24234  | -0.00011 | 0.72751  |
| C                    | 1.20725  | 1.00944  | -0.36990 |
| C                    | -0.00009 | 1.50618  | -0.84041 |
| C                    | -1.20739 | 1.00927  | -0.36992 |
| H                    | -0.00014 | 2.19195  | -1.68070 |
| H                    | -2.14652 | 1.35996  | -0.78047 |
| C                    | -1.20729 | -1.00905 | -0.37064 |
| H                    | -2.16971 | -0.00047 | 1.29712  |
| C                    | 0.00011  | -1.50548 | -0.84143 |
| H                    | -2.14636 | -1.35963 | -0.78141 |
| C                    | 1.20745  | -1.00895 | -0.37060 |
| H                    | 0.00015  | -2.19081 | -1.68208 |
| H                    | 2.16973  | -0.00007 | 1.29709  |
| H                    | 2.14656  | -1.35945 | -0.78135 |
| H                    | 2.14634  | 1.36028  | -0.78042 |
| H                    | 0.00000  | -0.88772 | 2.24713  |
| H                    | -0.00006 | 0.88466  | 2.24901  |

1

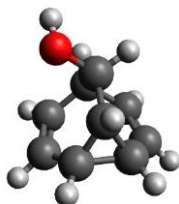

**Table S6.** Coordinates and energy for the optimised geometry of 1.

| $E = -424.112681035$ |         |          |          |
|----------------------|---------|----------|----------|
| Coordinates / Å      |         |          |          |
| Atom                 | x       | y        | z        |
| C                    | 1.00325 | 0.05344  | -0.84588 |
| C                    | 0.42154 | 1.22110  | -0.01720 |
| C                    | 0.14821 | -1.16971 | -0.66435 |

|   |          |          |          |
|---|----------|----------|----------|
| C | -1.32790 | -0.92275 | -0.55854 |
| C | -1.81422 | 0.46115  | -0.68543 |
| C | -0.99705 | 1.49639  | -0.46676 |
| H | -2.86128 | 0.61702  | -0.92281 |
| H | -1.35165 | 2.52006  | -0.51594 |
| C | 0.30519  | 0.83398  | 1.43916  |
| H | 1.04972  | 2.10609  | -0.14410 |
| C | -0.15684 | -0.38126 | 1.74744  |
| H | 0.52885  | 1.56726  | 2.20606  |
| C | -0.47681 | -1.35325 | 0.69231  |
| H | -0.32125 | -0.67256 | 2.77933  |
| H | 0.47745  | -2.05698 | -1.19152 |
| H | -0.66039 | -2.37185 | 1.01086  |
| H | -1.98193 | -1.70178 | -0.93005 |
| O | 2.32661  | -0.28444 | -0.45679 |
| H | 0.99003  | 0.34834  | -1.90384 |
| H | 2.88533  | 0.48547  | -0.57809 |

TS-1

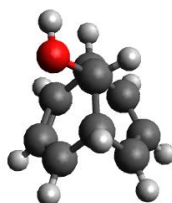

**Table S7.** Coordinates, energy, and imaginary vibrational frequency for the optimised geometry of TS-1.

| $E = -424.096582623$ |          |          |          |
|----------------------|----------|----------|----------|
| $\nu = -399.12$      |          |          |          |
| Coordinates / Å      |          |          |          |
| Atom                 | x        | y        | z        |
| C                    | 1.05389  | -0.01369 | -0.80919 |
| C                    | 0.33281  | 1.23574  | -0.32169 |
| C                    | 0.28923  | -1.24304 | -0.35628 |
| C                    | -1.17093 | -1.17847 | -0.64890 |
| C                    | -1.81036 | 0.04151  | -0.80736 |
| C                    | -1.12854 | 1.23473  | -0.61380 |
| H                    | -2.88507 | 0.06296  | -0.94955 |
| H                    | -1.63956 | 2.18633  | -0.68981 |
| C                    | -0.07403 | 1.19006  | 1.11154  |
| H                    | 0.84405  | 2.15236  | -0.61535 |
| C                    | -0.24193 | -0.02203 | 1.76397  |
| H                    | -0.21724 | 2.12691  | 1.63561  |
| C                    | -0.11152 | -1.21934 | 1.08019  |
| H                    | -0.59543 | -0.02956 | 2.78888  |
| H                    | 0.77377  | -2.16435 | -0.67208 |
| H                    | -0.28435 | -2.16475 | 1.57916  |

|   |          |          |          |
|---|----------|----------|----------|
| H | -1.71607 | -2.10866 | -0.74820 |
| O | 2.36914  | -0.11194 | -0.28650 |
| H | 1.08277  | -0.00092 | -1.90661 |
| H | 2.85226  | 0.68232  | -0.52097 |

(*S,S*)-2

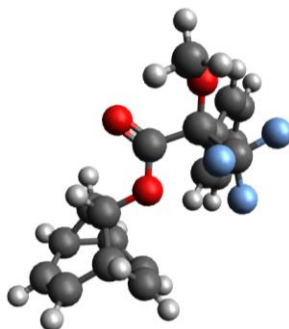

**Table S8.** Coordinates and energy for the optimised geometry of (*S,S*)-2.

| <i>E</i> = -1259.35910659 |          |          |          |
|---------------------------|----------|----------|----------|
| Coordinates / Å           |          |          |          |
| Atom                      | x        | y        | z        |
| C                         | 2.03331  | -0.81625 | -0.56427 |
| C                         | 2.91285  | -1.08586 | 0.66236  |
| C                         | 2.35907  | 0.52104  | -1.16938 |
| C                         | 3.81288  | 0.89616  | -1.13390 |
| C                         | 4.77246  | -0.07391 | -0.58073 |
| C                         | 4.36678  | -1.04344 | 0.24431  |
| H                         | 5.82032  | 0.04120  | -0.83535 |
| H                         | 5.06440  | -1.74229 | 0.69110  |
| C                         | 2.76169  | 0.03127  | 1.67190  |
| H                         | 2.64729  | -2.05167 | 1.09232  |
| C                         | 2.72945  | 1.29489  | 1.23925  |
| H                         | 2.75121  | -0.21018 | 2.72828  |
| C                         | 2.76602  | 1.59894  | -0.19969 |
| H                         | 2.69414  | 2.12419  | 1.93740  |
| H                         | 1.78658  | 0.80703  | -2.04197 |
| H                         | 2.53780  | 2.61771  | -0.48708 |
| H                         | 4.16830  | 1.52197  | -1.94262 |
| O                         | 0.66534  | -0.83255 | -0.08264 |
| H                         | 2.14453  | -1.61560 | -1.29888 |
| C                         | -0.31152 | -0.84937 | -0.97317 |
| O                         | -0.17734 | -0.96466 | -2.16021 |
| C                         | -1.69428 | -0.62442 | -0.30512 |
| O                         | -2.71069 | -1.09315 | -1.12761 |
| C                         | -2.75736 | -2.47728 | -1.45758 |
| H                         | -3.43569 | -2.55043 | -2.30577 |
| H                         | -3.15214 | -3.06776 | -0.62715 |
| H                         | -1.77748 | -2.85799 | -1.75339 |

|   |          |          |          |
|---|----------|----------|----------|
| C | -1.78212 | -1.31334 | 1.09317  |
| F | -1.34904 | -2.58895 | 1.04535  |
| F | -3.05781 | -1.34619 | 1.49901  |
| F | -1.07953 | -0.69960 | 2.04638  |
| H | -3.83344 | 0.85694  | -1.05227 |
| C | -3.07202 | 1.47592  | -0.59898 |
| C | -3.26496 | 2.84667  | -0.47182 |
| H | -4.18848 | 3.29018  | -0.82634 |
| C | -2.28293 | 3.64423  | 0.10208  |
| H | -2.43501 | 4.71346  | 0.19772  |
| C | -1.10416 | 3.06192  | 0.55291  |
| H | -0.33063 | 3.67291  | 1.00462  |
| C | -0.90659 | 1.69291  | 0.43160  |
| H | 0.01489  | 1.25681  | 0.79498  |
| C | -1.89154 | 0.89140  | -0.14773 |

(*S,R*)-2

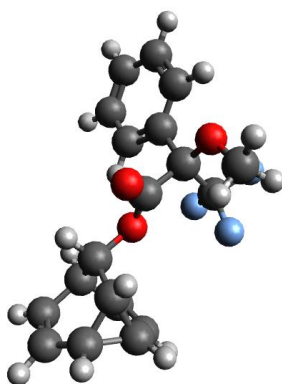

**Table S9.** Coordinates and energy for the optimised geometry of (*S,R*)-2.

| <i>E</i> = -1259.35647654 |          |          |          |
|---------------------------|----------|----------|----------|
| Coordinates / Å           |          |          |          |
| Atom                      | x        | y        | z        |
| C                         | 1.94555  | 0.63727  | -0.71704 |
| C                         | 2.84147  | -0.54078 | -0.97532 |
| C                         | 2.55646  | 1.56338  | 0.34159  |
| C                         | 4.31265  | -0.24217 | -0.92985 |
| H                         | 3.60765  | -1.05221 | 0.21526  |
| H                         | 2.49486  | -1.25472 | -1.71129 |
| O                         | 0.67532  | 0.19103  | -0.17773 |
| H                         | 1.74699  | 1.18731  | -1.63836 |
| C                         | -0.21220 | -0.31982 | -1.01340 |
| O                         | -0.07154 | -0.43975 | -2.19931 |
| C                         | -1.52109 | -0.72414 | -0.28248 |
| O                         | -2.19387 | -1.69781 | -1.01159 |
| C                         | -1.56486 | -2.95332 | -1.24350 |



|   |          |          |          |
|---|----------|----------|----------|
| H | -2.14076 | -3.42346 | -2.03860 |
| H | -1.59858 | -3.58344 | -0.35142 |
| H | -0.53149 | -2.83527 | -1.57715 |
| C | -1.23192 | -1.24538 | 1.16179  |
| F | -0.23467 | -2.14969 | 1.17620  |
| F | -2.32271 | -1.85559 | 1.64494  |
| F | -0.90278 | -0.28335 | 2.02509  |
| H | -0.91647 | 1.85982  | 0.48992  |
| C | -1.95553 | 1.74447  | 0.20935  |
| C | -2.80613 | 2.84018  | 0.27377  |
| H | -2.41810 | 3.79960  | 0.59624  |
| C | -4.14598 | 2.70802  | -0.07142 |
| H | -4.80873 | 3.56454  | -0.02155 |
| C | -4.62959 | 1.47226  | -0.48205 |
| H | -5.67288 | 1.35873  | -0.75378 |
| C | -3.78164 | 0.37303  | -0.55017 |
| H | -4.15621 | -0.58708 | -0.87630 |
| C | -2.43904 | 0.50349  | -0.20561 |
| C | 4.73701  | 1.14995  | -0.70742 |
| H | 4.94617  | -0.84553 | -1.56760 |
| C | 3.91168  | 2.03436  | -0.14004 |
| H | 5.74800  | 1.42730  | -0.98506 |
| H | 4.22039  | 3.05246  | 0.06711  |
| C | 3.36093  | -0.43048 | 1.52562  |
| H | 3.85267  | -2.10685 | 0.21741  |
| C | 2.83428  | 0.79342  | 1.61397  |
| H | 3.63417  | -0.98748 | 2.41492  |
| H | 2.66071  | 1.27240  | 2.57041  |
| H | 1.88321  | 2.40252  | 0.51994  |

TS-(S)-2

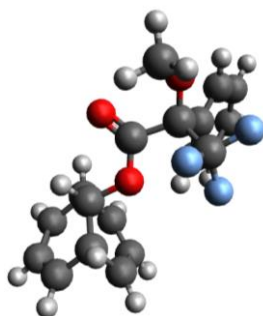

**Table S10.** Coordinates, energy, and imaginary vibrational frequency for the optimised geometry of TS-(S)-2.

| $E = -1259.34260452$ |                 |   |   |
|----------------------|-----------------|---|---|
| $\nu = -400.16$      |                 |   |   |
| Atom                 | Coordinates / Å |   |   |
|                      | x               | y | z |

---

|   |          |          |          |
|---|----------|----------|----------|
| C | 2.04834  | -0.75570 | -0.58289 |
| C | 2.92136  | -1.08974 | 0.60647  |
| C | 2.40609  | 0.61309  | -1.13257 |
| C | 3.87155  | 0.78851  | -1.33993 |
| C | 4.78808  | 0.02817  | -0.63043 |
| C | 4.37078  | -0.85826 | 0.35115  |
| H | 5.84710  | 0.22405  | -0.75257 |
| H | 5.08631  | -1.41897 | 0.93847  |
| C | 3.04142  | 0.01664  | 1.59909  |
| H | 2.68339  | -2.06032 | 1.03517  |
| C | 2.81319  | 1.33369  | 1.23110  |
| H | 3.28958  | -0.24115 | 2.62059  |
| C | 2.54511  | 1.66750  | -0.08705 |
| H | 2.96415  | 2.12213  | 1.95945  |
| H | 1.79402  | 0.89342  | -1.98565 |
| H | 2.40414  | 2.69900  | -0.38400 |
| H | 4.19666  | 1.51308  | -2.07529 |
| O | 0.68831  | -0.75872 | -0.09047 |
| H | 2.13672  | -1.51456 | -1.36156 |
| C | -0.29557 | -0.80623 | -0.97508 |
| O | -0.16309 | -0.91187 | -2.16284 |
| C | -1.68407 | -0.64916 | -0.29907 |
| O | -2.67725 | -1.17620 | -1.11486 |
| C | -2.65271 | -2.56224 | -1.43873 |
| H | -3.33406 | -2.67509 | -2.28008 |
| H | -3.00750 | -3.16958 | -0.60251 |
| H | -1.65682 | -2.89161 | -1.74279 |
| C | -1.72681 | -1.33608 | 1.10247  |
| F | -1.22818 | -2.58768 | 1.05765  |
| F | -2.99639 | -1.43351 | 1.51663  |
| F | -1.05108 | -0.68128 | 2.04743  |
| H | -3.91380 | 0.70189  | -1.02523 |
| C | -3.18513 | 1.36573  | -0.58157 |
| C | -3.45700 | 2.72276  | -0.45243 |
| H | -4.40919 | 3.11081  | -0.79596 |
| C | -2.51680 | 3.57729  | 0.10959  |
| H | -2.73048 | 4.63579  | 0.20671  |
| C | -1.30035 | 3.06613  | 0.54621  |
| H | -0.55829 | 3.72180  | 0.98774  |
| C | -1.02427 | 1.71081  | 0.42333  |
| H | -0.07342 | 1.33207  | 0.77505  |
| C | -1.96677 | 0.85272  | -0.14427 |

---

3

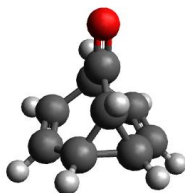**Table S11.** Coordinates and energy for the optimised geometry of **3**.

| $E = -422.902852756$ |          |          |          |
|----------------------|----------|----------|----------|
| Coordinates / Å      |          |          |          |
| Atom                 | x        | y        | z        |
| C                    | 1.26106  | -0.31720 | -0.00067 |
| C                    | 0.70430  | 1.10021  | -0.00000 |
| C                    | 0.21085  | -1.35697 | -0.00081 |
| C                    | -1.04473 | -0.98472 | -0.77166 |
| C                    | -1.04563 | 0.28425  | -1.52534 |
| C                    | -0.21036 | 1.27317  | -1.20246 |
| H                    | -1.76948 | 0.40063  | -2.32400 |
| H                    | -0.22286 | 2.22853  | -1.71407 |
| C                    | -0.20915 | 1.27215  | 1.20360  |
| H                    | 1.52999  | 1.80889  | -0.00008 |
| C                    | -1.04411 | 0.28295  | 1.52644  |
| H                    | -0.22114 | 2.22708  | 1.71602  |
| C                    | -1.04396 | -0.98537 | 0.77169  |
| H                    | -1.76721 | 0.39866  | 2.32587  |
| H                    | 0.54190  | -2.38635 | -0.00137 |
| H                    | -1.57546 | -1.81638 | 1.21752  |
| H                    | -1.57668 | -1.81534 | -1.21767 |
| O                    | 2.44890  | -0.55707 | -0.00086 |

TS-3

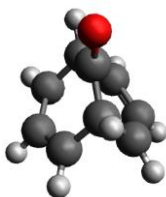**Table S12.** Coordinates, energy, and imaginary vibrational frequency for the optimised geometry of TS-3.

| $E = -422.882963771$ |   |   |   |
|----------------------|---|---|---|
| $\nu = -439.89$      |   |   |   |
| Coordinates / Å      |   |   |   |
| Atom                 | x | y | z |

|   |          |          |          |
|---|----------|----------|----------|
| C | -1.32015 | -0.00005 | -0.00025 |
| C | -0.49249 | 1.24931  | -0.00015 |
| C | -0.49252 | -1.24940 | -0.00029 |
| C | 0.62858  | -1.20593 | 0.99571  |
| C | 1.09692  | -0.00006 | 1.49299  |
| C | 0.62840  | 1.20582  | 0.99607  |
| H | 1.94461  | -0.00008 | 2.16789  |
| H | 1.02862  | 2.15166  | 1.33661  |
| C | 0.62882  | 1.20597  | -0.99576 |
| H | -1.09468 | 2.15214  | -0.00014 |
| C | 1.09763  | 0.00016  | -1.49251 |
| H | 1.02928  | 2.15182  | -1.33599 |
| C | 0.62898  | -1.20578 | -0.99571 |
| H | 1.94572  | 0.00021  | -2.16691 |
| H | -1.09460 | -2.15230 | -0.00044 |
| H | 1.02954  | -2.15153 | -1.33610 |
| H | 1.02877  | -2.15177 | 1.33628  |
| O | -2.53028 | -0.00005 | -0.00022 |

(*R,R*)-4

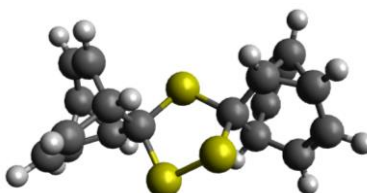

**Table S13.** Coordinates and energy for the optimised geometry of (*R,R*)-4.

| <i>E</i> = -1889.96876556 |          |          |          |
|---------------------------|----------|----------|----------|
| Coordinates / Å           |          |          |          |
| Atom                      | x        | y        | z        |
| S                         | -0.79874 | -1.74869 | -0.65801 |
| S                         | 0.79860  | -1.74855 | 0.65764  |
| C                         | -1.44024 | -0.10308 | -0.15050 |
| C                         | 1.44023  | -0.10305 | 0.15000  |
| S                         | 0.00005  | 1.05855  | -0.00101 |
| C                         | -2.35128 | 0.38949  | -1.24932 |
| C                         | -2.22936 | -0.16252 | 1.18104  |
| C                         | 2.35057  | 0.38978  | 1.24927  |
| C                         | 2.23004  | -0.16282 | -1.18105 |
| H                         | -1.90367 | 0.47231  | -2.23228 |
| C                         | -3.35363 | 1.44057  | -0.85075 |
| C                         | -3.79578 | -0.03220 | -1.16192 |
| C                         | -2.77467 | 1.21114  | 1.50762  |
| H                         | -1.57174 | -0.52619 | 1.96980  |
| C                         | -3.45604 | -1.03520 | 1.03242  |
| H                         | 1.90223  | 0.47270  | 2.23189  |

|   |          |          |          |
|---|----------|----------|----------|
| C | 3.35291  | 1.44091  | 0.85108  |
| C | 3.79506  | -0.03208 | 1.16284  |
| C | 2.77556  | 1.21078  | -1.50766 |
| H | 1.57286  | -0.52669 | -1.97005 |
| C | 3.45672  | -1.03538 | -1.03158 |
| H | -3.62943 | 2.15291  | -1.61803 |
| C | -3.33423 | 1.93502  | 0.53371  |
| C | -4.20073 | -0.93058 | -0.07136 |
| H | -4.31885 | -0.14235 | -2.10360 |
| H | -2.76574 | 1.55038  | 2.53690  |
| H | -3.74548 | -1.67659 | 1.85690  |
| H | 3.62851  | 2.15336  | 1.61835  |
| C | 3.33433  | 1.93499  | -0.53353 |
| C | 4.20069  | -0.93060 | 0.07267  |
| H | 4.31776  | -0.14176 | 2.10480  |
| H | 2.76755  | 1.54963  | -2.53708 |
| H | 3.74683  | -1.67667 | -1.85591 |
| H | -3.80090 | 2.89119  | 0.74259  |
| H | -5.12446 | -1.48759 | -0.18140 |
| H | 3.80096  | 2.89118  | -0.74238 |
| H | 5.12420  | -1.48778 | 0.18349  |

(*R,S*)-4

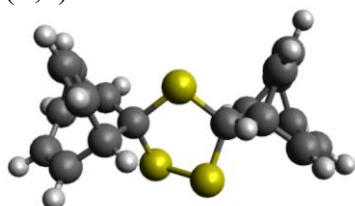

**Table S14.** Coordinates and energy for the optimised geometry of (*R,S*)-4.

| <i>E</i> = -1889.96849566 |          |          |          |
|---------------------------|----------|----------|----------|
| Coordinates / Å           |          |          |          |
| Atom                      | x        | y        | z        |
| S                         | -0.80489 | -1.74870 | -0.69909 |
| S                         | 0.80397  | -1.76173 | 0.60384  |
| C                         | -1.44206 | -0.10571 | -0.17833 |
| C                         | 1.43703  | -0.10729 | 0.10257  |
| S                         | -0.00095 | 1.05562  | -0.04155 |
| C                         | -2.36619 | 0.39096  | -1.26417 |
| C                         | -2.21557 | -0.17084 | 1.16238  |
| C                         | 2.37304  | 0.40056  | 1.22783  |
| C                         | 2.19855  | -0.17084 | -1.19591 |
| H                         | -1.93047 | 0.47794  | -2.25213 |
| C                         | -3.36455 | 1.43987  | -0.84961 |
| C                         | -3.80933 | -0.03178 | -1.16144 |

|   |          |          |          |
|---|----------|----------|----------|
| C | -2.75762 | 1.20121  | 1.50078  |
| H | -1.54858 | -0.53723 | 1.94200  |
| C | -3.44329 | -1.04379 | 1.02457  |
| H | 1.81807  | 0.44473  | 2.16444  |
| C | 2.92894  | 1.75845  | 0.85390  |
| C | 3.58961  | -0.49434 | 1.33876  |
| C | 3.21199  | 0.91674  | -1.41901 |
| H | 1.63497  | -0.51792 | -2.05265 |
| C | 3.64685  | -0.56316 | -1.09906 |
| H | -3.64965 | 2.15518  | -1.61068 |
| C | -3.32905 | 1.92873  | 0.53651  |
| C | -4.20099 | -0.93492 | -0.06990 |
| H | -4.34315 | -0.13860 | -2.09746 |
| H | -2.73657 | 1.53636  | 2.53121  |
| H | -3.72267 | -1.68869 | 1.84976  |
| H | 3.04519  | 2.50679  | 1.62897  |
| C | 3.35040  | 1.96430  | -0.39749 |
| C | 4.19352  | -0.90728 | 0.22014  |
| H | 3.99165  | -0.71249 | 2.32140  |
| H | 3.38906  | 1.21228  | -2.44544 |
| H | 4.06215  | -1.08964 | -1.94922 |
| H | -3.79343 | 2.88394  | 0.75469  |
| H | -5.12565 | -1.49198 | -0.17149 |
| H | 3.82248  | 2.89843  | -0.68099 |
| H | 5.10879  | -1.48735 | 0.26123  |

TS-4

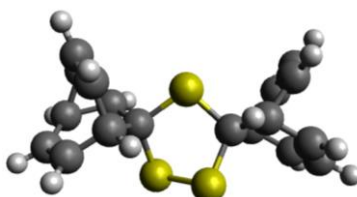

**Table S15.** Coordinates, energy, and imaginary vibrational frequency for the optimised geometry of TS-4.

| $E = -1889.95288631$ |                 |          |          |
|----------------------|-----------------|----------|----------|
| $\nu = -395.21$      |                 |          |          |
| Atom                 | Coordinates / Å |          |          |
|                      | x               | y        | z        |
| S                    | -0.80980        | -1.75668 | -0.66516 |
| S                    | 0.79492         | -1.75371 | 0.64286  |
| C                    | -1.44360        | -0.10534 | -0.16731 |
| C                    | 1.42728         | -0.11059 | 0.12565  |
| S                    | 0.00082         | 1.05437  | -0.04623 |
| C                    | -2.36455        | 0.37879  | -1.26144 |
| C                    | -2.21877        | -0.14960 | 1.17313  |
| C                    | 2.34728         | 0.40215  | 1.23146  |
| C                    | 2.21210         | -0.18580 | -1.17977 |

|   |          |          |          |
|---|----------|----------|----------|
| H | -1.92711 | 0.45097  | -2.24983 |
| C | -3.36039 | 1.43622  | -0.86267 |
| C | -3.80906 | -0.03814 | -1.15476 |
| C | -2.75738 | 1.22847  | 1.49171  |
| H | -1.55406 | -0.50713 | 1.95877  |
| C | -3.44872 | -1.02098 | 1.04543  |
| H | 1.83681  | 0.47420  | 2.18887  |
| C | 3.11622  | 1.62207  | 0.85132  |
| C | 3.67829  | -0.27188 | 1.28060  |
| C | 2.97769  | 1.05597  | -1.48783 |
| H | 1.60114  | -0.55171 | -2.00103 |
| C | 3.54476  | -0.84249 | -1.05610 |
| H | -3.64200 | 2.14182  | -1.63401 |
| C | -3.32529 | 1.94415  | 0.51662  |
| C | -4.20463 | -0.92514 | -0.05146 |
| H | -4.34178 | -0.15643 | -2.09001 |
| H | -2.73680 | 1.57766  | 2.51746  |
| H | -3.73088 | -1.65366 | 1.87906  |
| H | 3.44788  | 2.27693  | 1.64652  |
| C | 3.36475  | 1.92346  | -0.47881 |
| C | 4.20505  | -0.89623 | 0.16051  |
| H | 4.20503  | -0.27899 | 2.22622  |
| H | 3.20208  | 1.27170  | -2.52464 |
| H | 3.96841  | -1.30009 | -1.94108 |
| H | -3.78716 | 2.90363  | 0.72084  |
| H | -5.13061 | -1.48107 | -0.14665 |
| H | 3.97100  | 2.78804  | -0.72283 |
| H | 5.19685  | -1.33021 | 0.21095  |

(*R,S*)-8

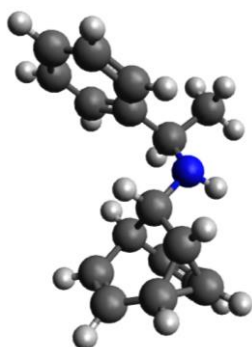

**Table S16.** Coordinates and energy for the optimised geometry of (*R,S*)-8.

| <i>E</i> = -713.894524038 |          |          |          |
|---------------------------|----------|----------|----------|
| Coordinates / Å           |          |          |          |
| Atom                      | x        | y        | z        |
| C                         | -0.82095 | -0.08555 | -0.41522 |

|   |          |          |          |
|---|----------|----------|----------|
| C | -1.99893 | -0.10699 | -1.35844 |
| C | -1.32491 | -0.37756 | 1.02774  |
| C | -3.09584 | -1.07922 | -1.05362 |
| C | -3.28733 | 0.46388  | -0.81589 |
| H | -1.76885 | 0.08473  | -2.39975 |
| N | -0.12653 | 1.18648  | -0.58654 |
| H | -0.12900 | -0.88982 | -0.68676 |
| C | -2.91713 | -1.99391 | 0.08479  |
| H | -3.66105 | -1.45889 | -1.89591 |
| C | -2.05692 | -1.69955 | 1.06431  |
| H | -3.52186 | -2.89396 | 0.12158  |
| H | -1.93818 | -2.34876 | 1.92534  |
| C | -3.28530 | 1.01588  | 0.54780  |
| H | -3.95745 | 0.93232  | -1.52622 |
| C | -2.34812 | 0.65706  | 1.43359  |
| H | -4.07900 | 1.70324  | 0.82199  |
| H | -2.35348 | 1.04320  | 2.44750  |
| H | -0.48144 | -0.39466 | 1.71887  |
| C | 0.99762  | 1.44477  | 0.30800  |
| H | -0.79709 | 1.94300  | -0.50200 |
| C | 1.53214  | 2.85057  | 0.03302  |
| H | 1.87197  | 2.93234  | -1.00253 |
| H | 2.37081  | 3.07698  | 0.69520  |
| H | 0.75080  | 3.59818  | 0.20216  |
| H | 4.93531  | -2.19353 | -0.34940 |
| C | 4.14133  | -1.46694 | -0.21709 |
| C | 3.53122  | -0.88620 | -1.32606 |
| H | 3.85021  | -1.16109 | -2.32568 |
| C | 2.51267  | 0.04230  | -1.15720 |
| H | 2.02504  | 0.48596  | -2.01867 |
| C | 2.08668  | 0.40482  | 0.12119  |
| C | 2.69822  | -0.18505 | 1.22371  |
| H | 2.36889  | 0.08248  | 2.22371  |
| C | 3.72216  | -1.11386 | 1.05943  |
| H | 4.18706  | -1.56478 | 1.92936  |
| H | 0.69335  | 1.41107  | 1.36665  |

---

(



*S,S*)-8

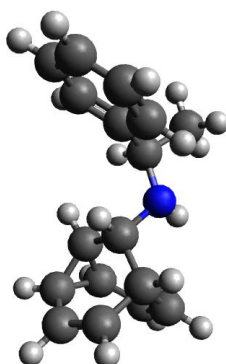

**Table S17.** Coordinates and energy for the optimised geometry of (*S,S*)-8.

| <i>E</i> = -713.893329005 |          |          |          |
|---------------------------|----------|----------|----------|
| Coordinates / Å           |          |          |          |
| Atom                      | x        | y        | z        |
| C                         | -0.81203 | -0.11443 | -0.21670 |
| C                         | -1.89192 | -0.36524 | -1.29171 |
| C                         | -1.46587 | -0.12909 | 1.15306  |
| C                         | -2.60975 | -1.08059 | 1.34093  |
| C                         | -2.96805 | -1.96929 | 0.22487  |
| C                         | -2.60929 | -1.66887 | -1.02740 |
| H                         | -3.55460 | -2.85587 | 0.44202  |
| H                         | -2.89609 | -2.29610 | -1.86464 |
| C                         | -2.97219 | 0.69198  | -1.19983 |
| H                         | -1.41734 | -0.36102 | -2.27306 |
| C                         | -3.42416 | 1.04956  | 0.00797  |
| H                         | -3.41241 | 1.08822  | -2.10837 |
| C                         | -2.84406 | 0.47348  | 1.23098  |
| H                         | -4.24799 | 1.74821  | 0.11171  |
| H                         | -0.81376 | 0.01696  | 2.00608  |
| H                         | -3.13256 | 0.93510  | 2.16749  |
| H                         | -2.76619 | -1.47082 | 2.33934  |
| N                         | -0.10163 | 1.12227  | -0.53191 |
| H                         | -0.09056 | -0.93561 | -0.27345 |
| C                         | 1.04186  | 1.43628  | 0.31881  |
| H                         | -0.75754 | 1.89609  | -0.51264 |
| C                         | 1.55525  | 2.83118  | -0.03977 |
| H                         | 1.85937  | 2.86498  | -1.08908 |
| H                         | 2.41475  | 3.09360  | 0.58095  |
| H                         | 0.77505  | 3.58194  | 0.12027  |
| H                         | 4.33393  | -1.43209 | 1.99255  |
| C                         | 3.83101  | -1.03874 | 1.11581  |
| C                         | 2.79927  | -0.11588 | 1.26398  |
| H                         | 2.50184  | 0.20448  | 2.25843  |
| C                         | 2.13876  | 0.39991  | 0.15253  |
| C                         | 2.52325  | -0.03132 | -1.11755 |

|   |         |          |          |
|---|---------|----------|----------|
| H | 1.99651 | 0.35426  | -1.98383 |
| C | 3.54976 | -0.95403 | -1.27006 |
| H | 3.83647 | -1.28269 | -2.26324 |
| C | 4.20900 | -1.46042 | -0.15282 |
| H | 5.00886 | -2.18280 | -0.27222 |
| H | 0.76873 | 1.45031  | 1.38647  |

TS-(S)-8

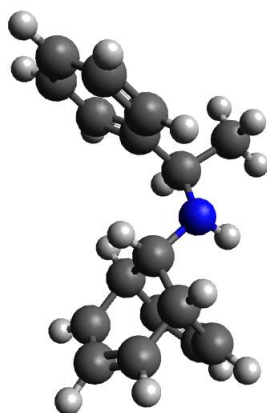

**Table S18.** Coordinates, energy, and imaginary vibrational frequency for the optimised geometry of TS-(S)-8.

| $E = -713.878374881$ |          |          |          |
|----------------------|----------|----------|----------|
| $\nu = -393.68$      |          |          |          |
| Coordinates / Å      |          |          |          |
| Atom                 | x        | y        | z        |
| C                    | -0.80297 | -0.11371 | -0.33887 |
| C                    | -1.95085 | -0.20365 | -1.33559 |
| C                    | -1.36519 | -0.30156 | 1.07318  |
| C                    | -2.31029 | -1.44224 | 1.21761  |
| C                    | -2.99411 | -1.94781 | 0.12137  |
| C                    | -2.87728 | -1.34812 | -1.12222 |
| H                    | -3.72604 | -2.73447 | 0.26721  |
| H                    | -3.45064 | -1.70803 | -1.96773 |
| C                    | -3.11879 | 0.66072  | -0.98131 |
| H                    | -1.60621 | -0.08733 | -2.36071 |
| C                    | -3.34787 | 1.03764  | 0.33393  |
| H                    | -3.77480 | 0.99531  | -1.77544 |
| C                    | -2.54881 | 0.55885  | 1.36482  |
| H                    | -4.23722 | 1.60976  | 0.57466  |
| H                    | -0.59647 | -0.27940 | 1.84275  |
| H                    | -2.76451 | 0.81677  | 2.39459  |
| H                    | -2.43928 | -1.88162 | 2.19942  |
| N                    | -0.11002 | 1.15179  | -0.55242 |
| H                    | -0.10008 | -0.92772 | -0.54135 |
| C                    | 1.02265  | 1.42983  | 0.32555  |
| H                    | -0.77906 | 1.91176  | -0.48421 |
| C                    | 1.54479  | 2.83501  | 0.02464  |

|   |         |          |          |
|---|---------|----------|----------|
| H | 1.87077 | 2.90415  | -1.01627 |
| H | 2.39085 | 3.07506  | 0.67237  |
| H | 0.76151 | 3.58053  | 0.19373  |
| H | 4.26632 | -1.52203 | 1.94591  |
| C | 3.78220 | -1.09150 | 1.07613  |
| C | 2.75301 | -0.16865 | 1.24124  |
| H | 2.43913 | 0.11480  | 2.24184  |
| C | 2.11694 | 0.39496  | 0.13883  |
| C | 2.52346 | 0.01198  | -1.13990 |
| H | 2.01661 | 0.43527  | -2.00050 |
| C | 3.54713 | -0.91079 | -1.30944 |
| H | 3.85087 | -1.20180 | -2.30924 |
| C | 4.18192 | -1.46510 | -0.20081 |
| H | 4.97981 | -2.18730 | -0.33357 |
| H | 0.73299 | 1.40855  | 1.38844  |

(*R,S*)-**L<sub>BB</sub>**

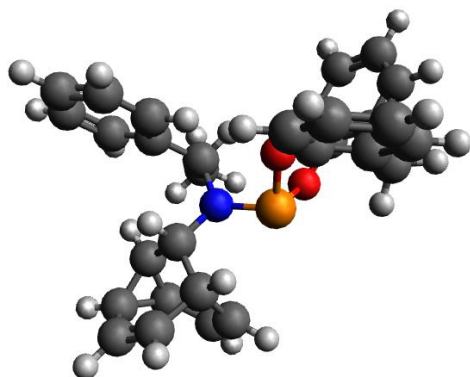

**Table S19.** Coordinates and energy for the optimised geometry of (*R,S*)-**L<sub>BB</sub>**.

| <i>E</i> = -1706.48652518 |          |          |          |
|---------------------------|----------|----------|----------|
| Coordinates / Å           |          |          |          |
| Atom                      | x        | y        | z        |
| H                         | -0.07207 | 1.73092  | 0.30123  |
| C                         | 0.98434  | 1.47049  | 0.40508  |
| C                         | 1.64127  | 2.00491  | -0.86063 |
| C                         | 2.74874  | 2.84670  | -0.84411 |
| C                         | 3.31083  | 3.30642  | -2.03332 |
| C                         | 2.76866  | 2.92962  | -3.25399 |
| C                         | 1.65421  | 2.09428  | -3.28077 |
| C                         | 1.09704  | 1.64000  | -2.09490 |
| C                         | 1.45139  | 2.11091  | 1.71275  |
| N                         | 1.02683  | -0.01209 | 0.46343  |
| C                         | 2.24782  | -0.70946 | 0.00668  |
| C                         | 2.14049  | -2.25194 | 0.13141  |
| H                         | 1.27324  | -2.61649 | -0.41984 |
| C                         | 2.07742  | -2.66824 | 1.58376  |
| C                         | 2.89496  | -2.07503 | 2.45931  |

|   |          |          |          |
|---|----------|----------|----------|
| C | 3.79819  | -0.99560 | 2.03416  |
| H | 4.29630  | -0.44149 | 2.82033  |
| C | 3.47569  | -0.25596 | 0.76769  |
| C | 4.66743  | -1.16537 | 0.72969  |
| C | 4.58656  | -2.38903 | -0.07642 |
| C | 3.39693  | -2.89900 | -0.40511 |
| H | 2.40175  | -0.48514 | -1.05494 |
| P | -0.39769 | -0.86144 | 0.66647  |
| O | -1.11138 | 0.08633  | 1.85565  |
| C | -2.25447 | 0.83815  | 1.73212  |
| C | -3.46135 | 0.27219  | 1.31441  |
| C | -4.58219 | 1.09815  | 1.24430  |
| C | -4.52074 | 2.44016  | 1.59383  |
| C | -3.31450 | 2.98011  | 2.02559  |
| C | -2.18243 | 2.18051  | 2.09135  |
| C | -3.56709 | -1.18633 | 0.93355  |
| C | -3.40593 | -1.43628 | -0.55258 |
| C | -2.28408 | -0.98355 | -1.25536 |
| C | -2.15715 | -1.20480 | -2.62223 |
| C | -3.15193 | -1.88224 | -3.31371 |
| C | -4.27305 | -2.34388 | -2.63470 |
| C | -4.38939 | -2.11727 | -1.26866 |
| O | -1.29380 | -0.26075 | -0.64118 |
| H | 3.18421  | 3.15838  | 0.09859  |
| H | 4.17428  | 3.96180  | -2.00070 |
| H | 3.20644  | 3.28625  | -4.17963 |
| H | 1.21800  | 1.80108  | -4.22950 |
| H | 0.22851  | 0.98927  | -2.10705 |
| H | 1.26192  | 3.18824  | 1.69272  |
| H | 2.50997  | 1.95336  | 1.91833  |
| H | 0.88770  | 1.67031  | 2.53529  |
| H | 1.42263  | -3.48154 | 1.87490  |
| H | 2.92962  | -2.39371 | 3.49554  |
| H | 3.70079  | 0.79965  | 0.73025  |
| H | 5.63811  | -0.68926 | 0.79334  |
| H | 5.50886  | -2.87650 | -0.37367 |
| H | 3.30779  | -3.81896 | -0.97208 |
| H | -5.52343 | 0.67019  | 0.91276  |
| H | -5.40913 | 3.05816  | 1.53577  |
| H | -3.25141 | 4.02454  | 2.30923  |
| H | -1.23362 | 2.58285  | 2.42374  |
| H | -4.54746 | -1.55832 | 1.23819  |
| H | -2.83523 | -1.77229 | 1.49736  |
| H | -1.27272 | -0.83536 | -3.12824 |
| H | -3.04853 | -2.04891 | -4.37987 |
| H | -5.05534 | -2.87481 | -3.16450 |

|   |          |          |          |
|---|----------|----------|----------|
| H | -5.26822 | -2.47241 | -0.73960 |
|---|----------|----------|----------|

(*S,S*)-L<sub>BB</sub>

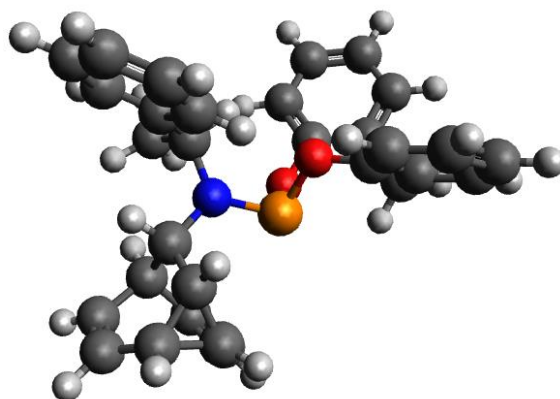

**Table S20.** Coordinates and energy for the optimised geometry of (*S,S*)-L<sub>BB</sub>.

| <i>E</i> = -1706.49207231 |          |          |          |
|---------------------------|----------|----------|----------|
| Coordinates / Å           |          |          |          |
| Atom                      | x        | y        | z        |
| H                         | -0.09359 | 1.67859  | 0.80472  |
| C                         | 0.97468  | 1.44594  | 0.81387  |
| C                         | 1.60879  | 2.30696  | -0.27652 |
| C                         | 2.54955  | 3.29712  | -0.00646 |
| C                         | 3.09738  | 4.06013  | -1.03621 |
| C                         | 2.71092  | 3.84221  | -2.35066 |
| C                         | 1.76756  | 2.85645  | -2.63115 |
| C                         | 1.22471  | 2.09981  | -1.60391 |
| C                         | 1.49053  | 1.73344  | 2.22235  |
| N                         | 1.08004  | 0.01546  | 0.46744  |
| C                         | 2.43157  | -0.52540 | 0.27505  |
| C                         | 2.52362  | -1.46364 | -0.90567 |
| H                         | 2.11651  | -1.08736 | -1.83729 |
| C                         | 2.39063  | -2.94033 | -0.62449 |
| C                         | 2.09376  | -3.36077 | 0.75133  |
| C                         | 2.34665  | -2.55041 | 1.78427  |
| C                         | 3.02821  | -1.22759 | 1.52595  |
| C                         | 4.47478  | -1.57498 | 1.24771  |
| C                         | 4.79711  | -2.10220 | 0.06258  |
| C                         | 3.77401  | -2.29123 | -0.97927 |
| H                         | 3.07003  | 0.33651  | 0.05647  |
| P                         | -0.27184 | -0.95291 | 0.33045  |
| O                         | -1.05583 | -0.57123 | 1.78026  |
| C                         | -2.20863 | 0.15603  | 1.92480  |
| C                         | -3.39871 | -0.24361 | 1.31192  |
| C                         | -4.53915 | 0.52846  | 1.52548  |
| C                         | -4.51178 | 1.65558  | 2.33599  |
| C                         | -3.32178 | 2.02789  | 2.95159  |

|   |          |          |          |
|---|----------|----------|----------|
| C | -2.17098 | 1.28076  | 2.74329  |
| C | -3.45511 | -1.46812 | 0.42916  |
| C | -3.27101 | -1.16123 | -1.04340 |
| C | -2.16404 | -0.44714 | -1.51513 |
| C | -2.02319 | -0.15771 | -2.86796 |
| C | -2.98525 | -0.57783 | -3.77592 |
| C | -4.08963 | -1.29313 | -3.32954 |
| C | -4.22191 | -1.57489 | -1.97553 |
| O | -1.20719 | 0.04479  | -0.66331 |
| H | 2.87032  | 3.48633  | 1.01092  |
| H | 3.83080  | 4.82464  | -0.80424 |
| H | 3.13855  | 4.43423  | -3.15210 |
| H | 1.45382  | 2.68058  | -3.65455 |
| H | 0.48980  | 1.33252  | -1.81558 |
| H | 1.23413  | 2.75168  | 2.52607  |
| H | 2.57577  | 1.62368  | 2.29235  |
| H | 1.02930  | 1.03455  | 2.92161  |
| H | 2.94290  | -0.57218 | 2.39065  |
| H | -5.46723 | 0.23085  | 1.04681  |
| H | -5.41404 | 2.23581  | 2.49058  |
| H | -3.28656 | 2.90178  | 3.59234  |
| H | -1.23327 | 1.55535  | 3.21087  |
| H | -4.42559 | -1.95189 | 0.55788  |
| H | -2.70765 | -2.19580 | 0.75924  |
| H | -1.15593 | 0.40456  | -3.19323 |
| H | -2.86984 | -0.34557 | -4.82848 |
| H | -4.84700 | -1.62678 | -4.02930 |
| H | -5.08854 | -2.12698 | -1.62549 |
| H | 4.13193  | -2.54334 | -1.96978 |
| H | 1.97674  | -3.55081 | -1.41732 |
| H | 1.66026  | -4.34312 | 0.90392  |
| H | 2.13276  | -2.85034 | 2.80395  |
| H | 5.20866  | -1.46958 | 2.03944  |
| H | 5.80860  | -2.43444 | -0.14580 |

---

TS-(S)-L<sub>BB</sub>

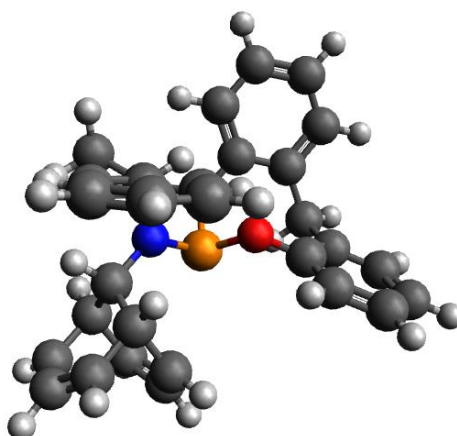

**Table S21.** Coordinates, energy, and imaginary vibrational frequency for the optimised geometry of TS-(S)L<sub>BB</sub>.

$$E = -1706.47639397$$

$$\nu = -396.75$$

| Atom | Coordinates / Å |          |          |
|------|-----------------|----------|----------|
|      | x               | y        | z        |
| H    | 0.23050         | 1.99713  | -0.25239 |
| C    | -0.83502        | 1.85523  | -0.43533 |
| C    | -1.52249        | 2.09539  | 0.90150  |
| C    | -2.79174        | 2.65906  | 1.00316  |
| C    | -3.41217        | 2.79485  | 2.24216  |
| C    | -2.76348        | 2.37815  | 3.39736  |
| C    | -1.48604        | 1.83101  | 3.30801  |
| C    | -0.87378        | 1.69141  | 2.07032  |
| C    | -1.23849        | 2.82194  | -1.54592 |
| N    | -0.99201        | 0.45232  | -0.88720 |
| C    | -2.36295        | -0.06994 | -0.94425 |
| C    | -2.78342        | -0.84434 | 0.30435  |
| H    | -2.56741        | -0.30750 | 1.22318  |
| C    | -2.38733        | -2.28190 | 0.32352  |
| C    | -2.10648        | -2.97181 | -0.85109 |
| C    | -2.25438        | -2.35940 | -2.07953 |
| C    | -2.65829        | -0.92339 | -2.17506 |
| C    | -4.06466        | -1.42616 | -2.19308 |
| C    | -4.77182        | -1.59921 | -1.01621 |
| C    | -4.16633        | -1.38746 | 0.21892  |
| H    | -3.01624        | 0.80319  | -1.01396 |
| P    | 0.33469         | -0.53705 | -1.10137 |
| O    | 1.34633         | 0.54188  | -1.91714 |
| C    | 2.49655         | 1.11536  | -1.43813 |
| C    | 3.56084         | 0.33948  | -0.97060 |
| C    | 4.70451         | 0.99935  | -0.52364 |
| C    | 4.80542         | 2.38387  | -0.55439 |
| C    | 3.74430         | 3.13732  | -1.04404 |

|   |          |          |          |
|---|----------|----------|----------|
| C | 2.59037  | 2.50323  | -1.48222 |
| C | 3.49046  | -1.17032 | -0.94110 |
| C | 3.04042  | -1.73702 | 0.39038  |
| C | 1.84230  | -1.33249 | 0.98686  |
| C | 1.43525  | -1.85072 | 2.21070  |
| C | 2.22545  | -2.78564 | 2.86531  |
| C | 3.41982  | -3.20394 | 2.29049  |
| C | 3.81472  | -2.67923 | 1.06548  |
| O | 1.05322  | -0.36735 | 0.41872  |
| H | -3.31435 | 2.99331  | 0.11373  |
| H | -4.40421 | 3.22880  | 2.30162  |
| H | -3.24583 | 2.48480  | 4.36264  |
| H | -0.96698 | 1.51246  | 4.20553  |
| H | 0.11055  | 1.24197  | 1.99341  |
| H | -1.11299 | 3.85738  | -1.21877 |
| H | -2.27812 | 2.68993  | -1.85650 |
| H | -0.60665 | 2.64403  | -2.41781 |
| H | -2.34757 | -0.43150 | -3.09488 |
| H | 5.53450  | 0.40698  | -0.15044 |
| H | 5.70905  | 2.87059  | -0.20628 |
| H | 3.81156  | 4.21865  | -1.08330 |
| H | 1.75056  | 3.07037  | -1.86638 |
| H | 4.48001  | -1.57289 | -1.16744 |
| H | 2.83037  | -1.52302 | -1.73952 |
| H | 0.49765  | -1.50583 | 2.63142  |
| H | 1.90678  | -3.18659 | 3.82082  |
| H | 4.04361  | -3.93406 | 2.79301  |
| H | 4.74962  | -3.00379 | 0.61928  |
| H | -4.70575 | -1.56904 | 1.14000  |
| H | -2.29341 | -2.77157 | 1.28478  |
| H | -1.86869 | -4.02816 | -0.80348 |
| H | -2.07015 | -2.89999 | -2.99937 |
| H | -4.51495 | -1.65157 | -3.15194 |
| H | -5.76323 | -2.03695 | -1.05233 |

---



(*R,S*)-L<sub>BB</sub>AuCl

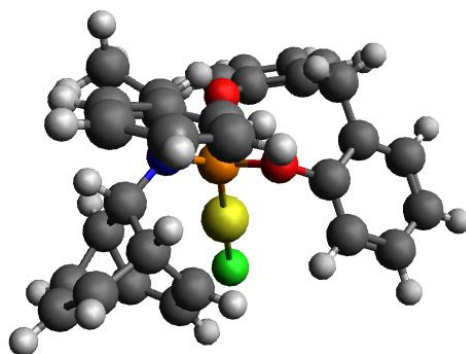

**Table S22.** Coordinates and energy for the optimised geometry of (*R,S*)-L<sub>BB</sub>AuCl.

| <i>E</i> = -2302.13781713 |          |          |          |
|---------------------------|----------|----------|----------|
| Coordinates / Å           |          |          |          |
| Atom                      | x        | y        | z        |
| H                         | 1.52877  | -2.27680 | -1.38988 |
| C                         | 2.27474  | -1.49029 | -1.48835 |
| C                         | 3.48423  | -1.90862 | -0.66523 |
| C                         | 4.79392  | -1.65835 | -1.07630 |
| C                         | 5.87160  | -2.00611 | -0.25999 |
| C                         | 5.64810  | -2.61522 | 0.97171  |
| C                         | 4.34077  | -2.88003 | 1.38460  |
| C                         | 3.26834  | -2.52880 | 0.57154  |
| C                         | 2.52594  | -1.29704 | -2.98304 |
| N                         | 1.65318  | -0.25233 | -0.91488 |
| C                         | 2.53524  | 0.91472  | -0.71895 |
| C                         | 3.12522  | 1.02545  | 0.71863  |
| H                         | 3.53086  | 0.06505  | 1.01764  |
| C                         | 2.07918  | 1.50791  | 1.70129  |
| C                         | 1.27857  | 2.52765  | 1.35511  |
| C                         | 1.33615  | 3.10108  | -0.00047 |
| C                         | 1.91890  | 2.23928  | -1.11265 |
| C                         | 2.71066  | 3.45399  | -0.67421 |
| C                         | 3.97477  | 3.24115  | 0.05604  |
| C                         | 4.20593  | 2.09239  | 0.70457  |
| H                         | 3.38189  | 0.73684  | -1.38428 |
| P                         | 0.05708  | -0.32993 | -0.39817 |
| O                         | -0.55239 | -1.43605 | -1.59494 |
| C                         | -1.94115 | -1.59786 | -1.76826 |
| C                         | -2.64970 | -2.46846 | -0.93784 |
| C                         | -4.02004 | -2.60940 | -1.17774 |
| C                         | -4.65357 | -1.90526 | -2.19815 |
| C                         | -3.91930 | -1.04296 | -3.01084 |
| C                         | -2.55323 | -0.89099 | -2.79611 |
| C                         | -1.97386 | -3.21148 | 0.19822  |
| C                         | -1.98465 | -2.42797 | 1.49663  |

|    |          |          |          |
|----|----------|----------|----------|
| C  | -0.94724 | -1.55325 | 1.82632  |
| C  | -0.95509 | -0.80487 | 2.99733  |
| C  | -2.02751 | -0.92088 | 3.87587  |
| C  | -3.07626 | -1.78851 | 3.57410  |
| C  | -3.04839 | -2.53296 | 2.39770  |
| O  | 0.15783  | -1.42481 | 0.96552  |
| H  | 4.98578  | -1.18756 | -2.03105 |
| H  | 6.88133  | -1.80052 | -0.58858 |
| H  | 6.48294  | -2.88420 | 1.60439  |
| H  | 4.15963  | -3.35517 | 2.33921  |
| H  | 2.25130  | -2.69483 | 0.90390  |
| H  | 2.99526  | -2.18688 | -3.40495 |
| H  | 3.17048  | -0.44173 | -3.19135 |
| H  | 1.57105  | -1.13490 | -3.48009 |
| H  | 1.44033  | 2.26908  | -2.08137 |
| H  | -4.59403 | -3.27965 | -0.55082 |
| H  | -5.71559 | -2.02759 | -2.35731 |
| H  | -4.40469 | -0.49073 | -3.80261 |
| H  | -1.95432 | -0.23152 | -3.40761 |
| H  | -2.49323 | -4.15742 | 0.35496  |
| H  | -0.94535 | -3.44238 | -0.07842 |
| H  | -0.12807 | -0.13870 | 3.19571  |
| H  | -2.04536 | -0.33649 | 4.78467  |
| H  | -3.91402 | -1.88266 | 4.25059  |
| H  | -3.86518 | -3.20487 | 2.16736  |
| H  | 5.10985  | 1.92737  | 1.27556  |
| H  | 2.04823  | 1.07039  | 2.69010  |
| H  | 0.57136  | 2.95269  | 2.05573  |
| H  | 0.53104  | 3.76850  | -0.27136 |
| H  | 2.67042  | 4.31717  | -1.32208 |
| H  | 4.69167  | 4.05190  | 0.07631  |
| Au | -1.46229 | 1.41769  | -0.03338 |
| Cl | -3.02512 | 3.16553  | 0.28856  |

---

(*S,S*)-L<sub>BB</sub>AuCl

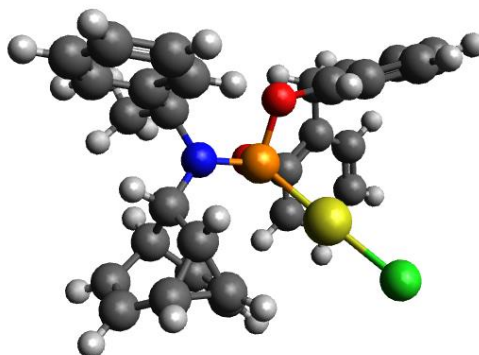

**Table S23.** Coordinates and energy for the optimised geometry of (*S,S*)-L<sub>BB</sub>AuCl.

| <i>E</i> = -2302.13649319 |                 |          |  |          |
|---------------------------|-----------------|----------|--|----------|
| Atom                      | Coordinates / Å |          |  | <i>z</i> |
|                           | <i>x</i>        | <i>y</i> |  |          |
| H                         | 1.59357         | 2.20428  |  | 1.47839  |
| C                         | 2.36440         | 1.43772  |  | 1.41864  |
| C                         | 3.46115         | 1.98209  |  | 0.50820  |
| C                         | 4.79460         | 2.08606  |  | 0.90602  |
| C                         | 5.76061         | 2.58430  |  | 0.02849  |
| C                         | 5.40207         | 2.98474  |  | -1.25438 |
| C                         | 4.06863         | 2.88987  |  | -1.65864 |
| C                         | 3.10925         | 2.39295  |  | -0.78429 |
| C                         | 2.80056         | 1.10282  |  | 2.84388  |
| N                         | 1.72665         | 0.26487  |  | 0.74683  |
| C                         | 2.59377         | -0.90314 |  | 0.49942  |
| C                         | 2.46668         | -1.49683 |  | -0.88598 |
| H                         | 2.50626         | -0.79070 |  | -1.70307 |
| C                         | 1.59725         | -2.73564 |  | -1.04632 |
| C                         | 0.82672         | -3.19387 |  | 0.12157  |
| C                         | 1.18301         | -2.82870 |  | 1.36271  |
| H                         | 0.63121         | -3.15751 |  | 2.23288  |
| C                         | 2.45720         | -2.03394 |  | 1.56096  |
| C                         | 3.59091         | -3.02217 |  | 1.34256  |
| C                         | 3.88962         | -3.39616 |  | 0.09132  |
| C                         | 3.16760         | -2.82723 |  | -1.06206 |
| H                         | 3.60786         | -0.50708 |  | 0.58677  |
| P                         | 0.06890         | 0.27551  |  | 0.47073  |
| O                         | -0.59175        | 0.14598  |  | 2.08610  |
| C                         | -1.96643        | -0.11254 |  | 2.24398  |
| C                         | -2.88295        | 0.94003  |  | 2.19003  |
| C                         | -4.23343        | 0.62794  |  | 2.37395  |
| C                         | -4.65052        | -0.68239 |  | 2.59206  |
| C                         | -3.71385        | -1.71400 |  | 2.63597  |
| C                         | -2.36392        | -1.42623 |  | 2.46300  |

|    |          |          |          |
|----|----------|----------|----------|
| C  | -2.43864 | 2.36355  | 1.91427  |
| C  | -2.44483 | 2.70018  | 0.43587  |
| C  | -1.32650 | 2.47644  | -0.36898 |
| C  | -1.32348 | 2.75460  | -1.73018 |
| C  | -2.47184 | 3.26794  | -2.32433 |
| C  | -3.60480 | 3.50246  | -1.54684 |
| C  | -3.58439 | 3.22314  | -0.18291 |
| O  | -0.13948 | 1.98051  | 0.20406  |
| H  | 5.09489  | 1.78163  | 1.89879  |
| H  | 6.79043  | 2.65531  | 0.35144  |
| H  | 6.15035  | 3.36904  | -1.93398 |
| H  | 3.78022  | 3.20572  | -2.65218 |
| H  | 2.07434  | 2.32110  | -1.09171 |
| H  | 3.16361  | 2.00173  | 3.34420  |
| H  | 3.59591  | 0.35656  | 2.87162  |
| H  | 1.94447  | 0.72085  | 3.39830  |
| H  | 1.13771  | -2.88848 | -2.01192 |
| H  | -0.03054 | -3.83098 | -0.05372 |
| H  | 2.49420  | -1.60425 | 2.55739  |
| H  | 4.08155  | -3.45732 | 2.20306  |
| H  | 4.64445  | -4.14708 | -0.10341 |
| H  | 3.58459  | -3.03059 | -2.03718 |
| H  | -4.96448 | 1.42566  | 2.34036  |
| H  | -5.70146 | -0.89776 | 2.72402  |
| H  | -4.03070 | -2.73414 | 2.79926  |
| H  | -1.61219 | -2.20142 | 2.48615  |
| H  | -3.11232 | 3.04738  | 2.43137  |
| H  | -1.43883 | 2.51769  | 2.31924  |
| H  | -0.42915 | 2.55986  | -2.30449 |
| H  | -2.48158 | 3.47885  | -3.38397 |
| H  | -4.50143 | 3.89962  | -2.00123 |
| H  | -4.46584 | 3.40961  | 0.41692  |
| Au | -1.14313 | -0.94210 | -1.12315 |
| Cl | -2.36709 | -2.11437 | -2.77483 |

---

TS-L<sub>BB</sub>AuCl

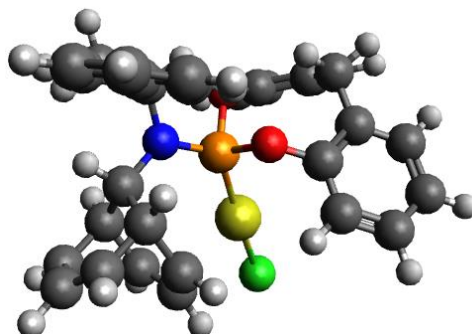

**Table S24.** Coordinates, energy, and imaginary vibrational frequency for the optimised geometry of TS-L<sub>BB</sub>AuCl.

| $E = -2302.11698884$ |          |          |          |  |
|----------------------|----------|----------|----------|--|
| $\nu = -402.82$      |          |          |          |  |
| Coordinates / Å      |          |          |          |  |
| Atom                 | x        | y        | z        |  |
| H                    | 1.55399  | -2.22533 | -1.49395 |  |
| C                    | 2.30325  | -1.43683 | -1.52527 |  |
| C                    | 3.48611  | -1.89706 | -0.68176 |  |
| C                    | 4.81032  | -1.72311 | -1.08644 |  |
| C                    | 5.86334  | -2.13146 | -0.26554 |  |
| C                    | 5.60099  | -2.72321 | 0.96637  |  |
| C                    | 4.27881  | -2.90753 | 1.37578  |  |
| C                    | 3.23125  | -2.49735 | 0.55800  |  |
| C                    | 2.60696  | -1.16263 | -2.99693 |  |
| N                    | 1.66211  | -0.22614 | -0.91524 |  |
| C                    | 2.55899  | 0.90850  | -0.62208 |  |
| C                    | 2.94355  | 1.02860  | 0.85207  |  |
| H                    | 3.24185  | 0.07678  | 1.27320  |  |
| C                    | 1.99757  | 1.82404  | 1.70284  |  |
| C                    | 1.13883  | 2.76658  | 1.14118  |  |
| C                    | 1.16400  | 3.03066  | -0.22078 |  |
| C                    | 2.08614  | 2.27021  | -1.13279 |  |
| C                    | 3.09942  | 3.34342  | -0.85200 |  |
| C                    | 3.97179  | 3.22992  | 0.21975  |  |
| C                    | 3.89643  | 2.15471  | 1.10380  |  |
| H                    | 3.47478  | 0.67838  | -1.16728 |  |
| P                    | 0.06613  | -0.33000 | -0.39004 |  |
| O                    | -0.51279 | -1.47959 | -1.55553 |  |
| C                    | -1.89844 | -1.67670 | -1.72671 |  |
| C                    | -2.59182 | -2.53012 | -0.86633 |  |
| C                    | -3.95812 | -2.70730 | -1.10598 |  |
| C                    | -4.60129 | -2.05476 | -2.15418 |  |
| C                    | -3.88117 | -1.20889 | -2.99619 |  |
| C                    | -2.51951 | -1.02126 | -2.78239 |  |

|    |          |          |          |
|----|----------|----------|----------|
| C  | -1.90661 | -3.22058 | 0.29732  |
| C  | -1.93505 | -2.39601 | 1.57009  |
| C  | -0.91099 | -1.49707 | 1.87567  |
| C  | -0.93371 | -0.71167 | 3.02193  |
| C  | -2.00721 | -0.81555 | 3.90065  |
| C  | -3.04211 | -1.70774 | 3.62354  |
| C  | -2.99980 | -2.48855 | 2.47134  |
| O  | 0.19264  | -1.37749 | 1.01230  |
| H  | 5.03395  | -1.27033 | -2.04289 |
| H  | 6.88423  | -1.98617 | -0.59180 |
| H  | 6.41645  | -3.04010 | 1.60216  |
| H  | 4.06635  | -3.36830 | 2.33104  |
| H  | 2.20558  | -2.60633 | 0.88750  |
| H  | 3.08005  | -2.03175 | -3.45613 |
| H  | 3.26695  | -0.30385 | -3.13210 |
| H  | 1.67175  | -0.95908 | -3.51597 |
| H  | 1.75608  | 2.21998  | -2.16532 |
| H  | -4.52127 | -3.36523 | -0.45671 |
| H  | -5.66003 | -2.20417 | -2.31203 |
| H  | -4.37427 | -0.69621 | -3.80946 |
| H  | -1.93156 | -0.37231 | -3.41530 |
| H  | -2.40951 | -4.17005 | 0.48365  |
| H  | -0.87316 | -3.44259 | 0.03173  |
| H  | -0.11693 | -0.02717 | 3.20091  |
| H  | -2.03717 | -0.20246 | 4.79003  |
| H  | -3.88067 | -1.79256 | 4.30025  |
| H  | -3.80601 | -3.17945 | 2.26071  |
| H  | 4.55473  | 2.08634  | 1.95700  |
| H  | 1.98474  | 1.62845  | 2.76497  |
| H  | 0.51283  | 3.36814  | 1.78564  |
| H  | 0.52777  | 3.78861  | -0.65368 |
| H  | 3.12501  | 4.20254  | -1.50619 |
| H  | 4.64295  | 4.04848  | 0.44216  |
| Au | -1.47237 | 1.41401  | -0.08075 |
| Cl | -3.13229 | 3.09300  | 0.15298  |

---

(*C,R,S*)-L<sub>BB</sub>PdCl<sub>2</sub>

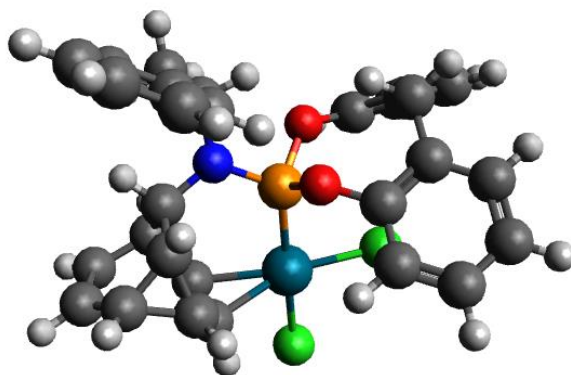

**Table S25.** Coordinates and energy for the optimised geometry of (*C,R,S*)-L<sub>BB</sub>PdCl<sub>2</sub>.

| <i>E</i> = -2754.49310405 |          |          |          |
|---------------------------|----------|----------|----------|
| Coordinates / Å           |          |          |          |
| Atom                      | x        | y        | z        |
| Pd                        | -0.72400 | 2.02289  | -0.01966 |
| Cl                        | -1.49089 | 4.26178  | 0.13612  |
| Cl                        | -2.95624 | 1.26126  | 0.12354  |
| P                         | -0.06169 | -0.16564 | -0.34064 |
| C                         | 1.25865  | 2.84547  | 0.74525  |
| C                         | 2.10685  | 1.95946  | 1.54608  |
| O                         | -0.83158 | -1.12127 | -1.53269 |
| O                         | -0.16962 | -1.19036 | 1.05598  |
| N                         | 1.51833  | -0.43566 | -0.84105 |
| C                         | 1.30743  | 2.79725  | -0.64280 |
| H                         | 0.83493  | 3.70876  | 1.23846  |
| H                         | 1.87115  | 1.88432  | 2.59628  |
| C                         | 2.80706  | 0.78752  | 0.89866  |
| C                         | -2.20077 | -1.36227 | -1.75346 |
| C                         | -1.31704 | -1.29461 | 1.86359  |
| C                         | 1.93464  | -1.74588 | -1.41628 |
| C                         | 2.56796  | 0.55669  | -0.58002 |
| C                         | 2.35714  | 1.91176  | -1.29753 |
| C                         | 3.62052  | 2.74011  | -1.11213 |
| H                         | 0.94751  | 3.63815  | -1.22159 |
| H                         | 2.93458  | -0.10776 | 1.48798  |
| C                         | 3.66439  | 1.98301  | 1.22591  |
| C                         | -2.79113 | -0.71251 | -2.82802 |
| C                         | -2.89146 | -2.27994 | -0.96210 |
| C                         | -2.32727 | -2.18288 | 1.49757  |
| C                         | -1.37969 | -0.52940 | 3.01938  |
| H                         | 1.05645  | -2.38781 | -1.36794 |
| C                         | 2.28831  | -1.57062 | -2.89164 |
| C                         | 3.01741  | -2.37599 | -0.54583 |
| H                         | 3.47874  | 0.12621  | -0.99803 |

|   |          |          |          |
|---|----------|----------|----------|
| H | 2.13366  | 1.73814  | -2.34692 |
| H | 3.98703  | 3.33255  | -1.93869 |
| C | 4.19015  | 2.78088  | 0.10144  |
| H | 4.28507  | 1.92609  | 2.10707  |
| H | -2.20465 | -0.01167 | -3.40371 |
| C | -4.12706 | -0.95806 | -3.12266 |
| C | -4.23325 | -2.51013 | -1.27969 |
| C | -2.24246 | -2.98335 | 0.21339  |
| C | -3.43400 | -2.27788 | 2.34428  |
| C | -2.49418 | -0.63616 | 3.84448  |
| H | -0.56802 | 0.14663  | 3.24793  |
| H | 3.10834  | -0.86416 | -3.03683 |
| H | 1.41296  | -1.19409 | -3.41802 |
| H | 2.57748  | -2.52458 | -3.33460 |
| C | 4.32064  | -2.58669 | -0.99814 |
| C | 2.68750  | -2.74885 | 0.76434  |
| H | 5.05420  | 3.40445  | 0.28778  |
| H | -4.59886 | -0.44595 | -3.94895 |
| C | -4.85150 | -1.85754 | -2.34240 |
| H | -4.79682 | -3.21387 | -0.68061 |
| H | -1.19720 | -3.19449 | -0.01461 |
| H | -2.74274 | -3.94076 | 0.36304  |
| H | -4.23653 | -2.95609 | 2.08422  |
| C | -3.52350 | -1.51250 | 3.50425  |
| H | -2.56132 | -0.03543 | 4.74024  |
| H | 4.60010  | -2.31459 | -2.00662 |
| C | 5.28056  | -3.15561 | -0.15785 |
| C | 3.64185  | -3.31698 | 1.60114  |
| H | 1.68198  | -2.56562 | 1.12334  |
| H | -5.89258 | -2.05013 | -2.56017 |
| H | -4.39515 | -1.59639 | 4.13795  |
| H | 6.28660  | -3.31158 | -0.52309 |
| C | 4.94484  | -3.52139 | 1.14178  |
| H | 3.37157  | -3.60159 | 2.60911  |
| H | 5.68769  | -3.96327 | 1.79176  |

---



(A,S,S)-L<sub>BB</sub>PdCl<sub>2</sub>

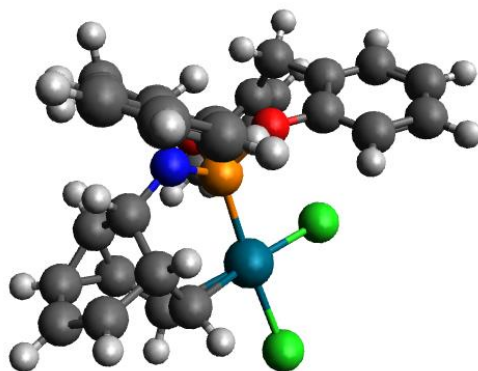

**Table S26.** Coordinates and energy for the optimised geometry of (A,S,S)-L<sub>BB</sub>PdCl<sub>2</sub>.

| <i>E</i> = -2754.49276093 |          |          |          |
|---------------------------|----------|----------|----------|
| Coordinates / Å           |          |          |          |
| Atom                      | x        | y        | z        |
| Pd                        | -0.50727 | -1.64894 | -0.99346 |
| Cl                        | -0.94342 | -3.42642 | -2.50312 |
| Cl                        | -2.69856 | -0.82777 | -1.33685 |
| P                         | -0.07977 | 0.20369  | 0.31983  |
| C                         | 1.10589  | -3.01315 | -0.15311 |
| C                         | 1.69460  | -2.16893 | -1.08706 |
| O                         | -0.85973 | 0.23627  | 1.86888  |
| O                         | -0.44152 | 1.76003  | -0.29391 |
| N                         | 1.51842  | 0.50599  | 0.73531  |
| C                         | 1.43495  | -2.88686 | 1.26923  |
| H                         | 1.71103  | -2.45318 | -2.13125 |
| C                         | 2.78394  | -1.21903 | -0.61454 |
| C                         | -2.23331 | -0.01263 | 2.04873  |
| C                         | -1.63073 | 2.25419  | -0.86112 |
| C                         | 1.93774  | 1.81833  | 1.29840  |
| C                         | 2.50183  | -0.58257 | 0.76723  |
| C                         | 2.16200  | -1.66222 | 1.77505  |
| C                         | 2.97581  | -2.92613 | 1.65258  |
| H                         | 0.79123  | -3.40786 | 1.96088  |
| H                         | 2.97748  | -3.40786 | -1.33946 |
| C                         | 3.97089  | -2.15927 | -0.46079 |
| C                         | -2.62627 | -1.29064 | 2.42030  |
| C                         | -3.14235 | 1.03088  | 1.88015  |
| C                         | -2.70624 | 2.61010  | -0.04757 |
| C                         | -1.64408 | 2.43512  | -2.23665 |
| H                         | 1.10049  | 2.49368  | 1.12992  |
| C                         | 2.17238  | 1.71660  | 2.80519  |
| C                         | 3.10992  | 2.34272  | 0.47778  |
| H                         | 3.43744  | -0.11090 | 1.07068  |
| H                         | 1.90888  | -1.31117 | 2.76430  |

|   |          |          |          |
|---|----------|----------|----------|
| H | 3.18022  | -3.47961 | 2.55644  |
| C | 4.01167  | -2.97653 | 0.60176  |
| H | 4.71589  | -2.19642 | -1.24301 |
| H | -1.87566 | -2.06002 | 2.53308  |
| C | -3.97675 | -1.55401 | 2.62221  |
| C | -4.49292 | 0.74400  | 2.09195  |
| C | -2.68315 | 2.41154  | 1.45507  |
| C | -3.83257 | 3.14235  | -0.68154 |
| C | -2.77668 | 3.14235  | -2.84308 |
| H | -0.78003 | 2.13850  | -2.81303 |
| H | 2.98247  | 1.02783  | 3.05315  |
| H | 1.25947  | 1.36099  | 3.28096  |
| H | 2.42261  | 2.69479  | 3.21802  |
| C | 4.37080  | 2.58561  | 1.02309  |
| C | 2.90749  | 2.57463  | -0.88929 |
| H | 4.80865  | -3.69897 | 0.71603  |
| H | -4.29668 | -2.54829 | 2.89949  |
| C | -4.91148 | -0.53355 | 2.45508  |
| H | -5.22288 | 1.53305  | 1.96394  |
| H | -1.67611 | 2.58991  | 1.83359  |
| H | -3.33849 | 3.15407  | 1.91181  |
| H | -4.68585 | 3.42387  | -0.07790 |
| C | -3.87679 | 3.31501  | -2.06215 |
| H | -2.80216 | 3.09570  | -3.91540 |
| H | 4.55204  | 2.42137  | 2.07630  |
| C | 5.41495  | 3.04617  | 0.21706  |
| C | 3.94464  | 3.03434  | -1.69242 |
| H | 1.92746  | 2.38937  | -1.31040 |
| H | -5.96344 | -0.73267 | 2.60380  |
| H | -4.76465 | 3.72170  | -2.52549 |
| H | 6.38765  | 3.22821  | 0.65355  |
| C | 5.20606  | 3.26930  | -1.13993 |
| H | 3.77265  | 3.21297  | -2.74523 |
| H | 6.01450  | 3.62569  | -1.76349 |
| H | 1.35888  | -4.01256 | -0.43959 |

---

TS-L<sub>BB</sub>PdCl<sub>2</sub> (TS-Pd)

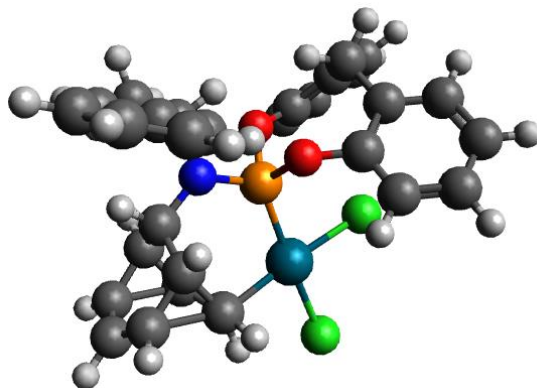

**Table S27.** Coordinates, energy, and imaginary vibrational frequency for the optimised geometry of TS-L<sub>BB</sub>PdCl<sub>2</sub> (TS-Pd).

| <i>E</i> = -2754.46921247 |          |          |          |
|---------------------------|----------|----------|----------|
| <i>ν</i> = -430.90        |          |          |          |
| Coordinates / Å           |          |          |          |
| Atom                      | x        | y        | z        |
| Pd                        | -0.69808 | 2.01790  | 0.31666  |
| Cl                        | -1.46945 | 4.16411  | 0.97269  |
| Cl                        | -2.93220 | 1.21521  | 0.39336  |
| P                         | -0.04312 | -0.11326 | -0.31668 |
| C                         | 1.31069  | 2.90561  | 0.33117  |
| C                         | 2.02325  | 2.06770  | 1.24050  |
| O                         | -0.81440 | -0.87287 | -1.65620 |
| O                         | -0.23407 | -1.32580 | 0.91052  |
| N                         | 1.54256  | -0.46833 | -0.77760 |
| C                         | 1.62037  | 2.81641  | -1.06273 |
| H                         | 1.02931  | 3.88205  | 0.69995  |
| H                         | 1.86775  | 2.18516  | 2.30246  |
| C                         | 2.87762  | 0.95190  | 0.75668  |
| C                         | -2.18432 | -1.02280 | -1.93215 |
| C                         | -1.39830 | -1.56011 | 1.66301  |
| C                         | 1.88476  | -1.83064 | -1.27722 |
| C                         | 2.63668  | 0.50076  | -0.67903 |
| C                         | 2.44740  | 1.70285  | -1.59634 |
| C                         | 3.45174  | 2.80783  | -1.38576 |
| H                         | 1.14701  | 3.49700  | -1.75405 |
| H                         | 3.01748  | 0.12043  | 1.43520  |
| C                         | 3.87493  | 2.07202  | 0.89736  |
| C                         | -2.73793 | -0.18418 | -2.88959 |
| C                         | -2.91852 | -2.03430 | -1.31233 |
| C                         | -2.40435 | -2.37030 | 1.13779  |
| C                         | -1.47479 | -1.00967 | 2.93477  |
| H                         | 0.98996  | -2.43547 | -1.13790 |

|   |          |          |          |
|---|----------|----------|----------|
| C | 2.17875  | -1.78195 | -2.77519 |
| C | 2.98471  | -2.43062 | -0.40697 |
| H | 3.53267  | -0.02854 | -1.00453 |
| H | 2.27178  | 1.42645  | -2.62785 |
| H | 3.70057  | 3.44550  | -2.21903 |
| C | 4.17279  | 2.88540  | -0.19305 |
| H | 4.43841  | 2.15022  | 1.81351  |
| H | -2.12067 | 0.58243  | -3.33478 |
| C | -4.07698 | -0.32959 | -3.23268 |
| C | -4.26189 | -2.16222 | -1.67569 |
| C | -2.30822 | -2.94141 | -0.26257 |
| C | -3.52305 | -2.60417 | 1.94117  |
| C | -2.59990 | -1.25259 | 3.71489  |
| H | -0.66650 | -0.38486 | 3.28704  |
| H | 3.02838  | -1.13568 | -3.00670 |
| H | 1.29945  | -1.39769 | -3.28845 |
| H | 2.39849  | -2.77988 | -3.15704 |
| C | 4.25068  | -2.74703 | -0.90249 |
| C | 2.71115  | -2.66125 | 0.94830  |
| H | 4.91632  | 3.66272  | -0.08073 |
| H | -4.51978 | 0.32967  | -3.96560 |
| C | -4.84251 | -1.32031 | -2.62017 |
| H | -4.85785 | -2.93476 | -1.20668 |
| H | -1.26278 | -3.13327 | -0.50566 |
| H | -2.82838 | -3.89974 | -0.28645 |
| H | -4.32301 | -3.22430 | 1.55729  |
| C | -3.62732 | -2.05071 | 3.21463  |
| H | -2.67700 | -0.81565 | 4.70026  |
| H | 4.48511  | -2.58741 | -1.94592 |
| C | 5.22999  | -3.27896 | -0.06026 |
| C | 3.68503  | -3.19276 | 1.78681  |
| H | 1.72904  | -2.41014 | 1.32922  |
| H | -5.88631 | -1.43662 | -2.87601 |
| H | -4.50802 | -2.23874 | 3.81256  |
| H | 6.20636  | -3.51861 | -0.45922 |
| C | 4.95117  | -3.50155 | 1.28445  |
| H | 3.45785  | -3.37047 | 2.82938  |
| H | 5.70891  | -3.91500 | 1.93595  |

---

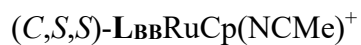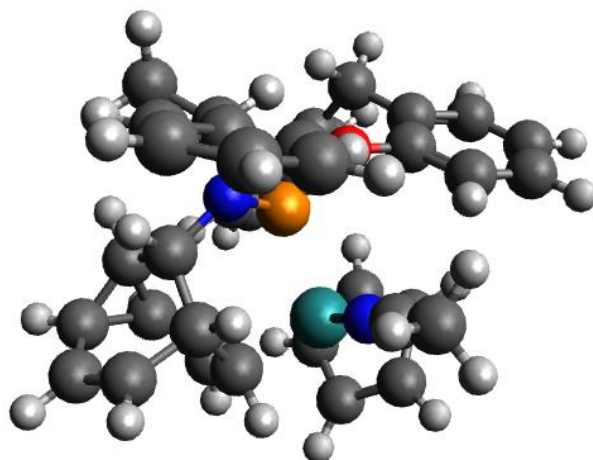

**Table S28.** Coordinates and energy for the optimised geometry of  $(C,S,S)\text{-L}_{\text{BB}}\text{RuCp}(\text{NCMe})^+$ .

| $E = -2127.06388822$ |          |          |          |
|----------------------|----------|----------|----------|
| Coordinates / Å      |          |          |          |
| Atom                 | x        | y        | z        |
| Ru                   | 0.66470  | -0.76466 | 1.46175  |
| P                    | 0.09060  | 0.06884  | -0.59873 |
| N                    | -0.68671 | 0.59756  | 2.17871  |
| C                    | -0.33589 | -2.79846 | 0.98163  |
| C                    | -0.52971 | -3.26593 | -0.40598 |
| C                    | 2.90985  | -0.64933 | 1.23532  |
| C                    | 2.48203  | 0.23571  | 2.26949  |
| C                    | 1.90537  | -0.56991 | 3.32178  |
| C                    | 1.93332  | -1.92085 | 2.91158  |
| C                    | 2.53338  | -1.97637 | 1.59356  |
| O                    | 0.93489  | -0.43299 | -2.05640 |
| O                    | 0.23478  | 1.79724  | -0.77886 |
| N                    | -1.51818 | -0.07758 | -1.07004 |
| C                    | -1.46819 | 1.33609  | 2.60061  |
| C                    | -1.26843 | -1.94502 | 1.56982  |
| H                    | 0.23709  | -3.46313 | 1.61209  |
| H                    | 0.31146  | -3.76776 | -0.85957 |
| C                    | -1.48301 | -2.54528 | -1.32600 |
| H                    | 3.42700  | -0.36096 | 0.33808  |
| H                    | 2.64373  | 1.29816  | 2.29436  |
| H                    | 1.50809  | -0.20059 | 4.25110  |
| H                    | 1.57885  | -2.76087 | 3.48324  |
| H                    | 2.74776  | -2.86395 | 1.02680  |
| C                    | 2.31250  | -0.67338 | -2.07254 |
| C                    | 1.33732  | 2.51329  | -0.28767 |
| C                    | -2.14884 | 0.82962  | -2.06316 |
| C                    | -2.20878 | -1.34106 | -0.75712 |

|   |          |          |          |
|---|----------|----------|----------|
| C | -2.45827 | 2.26024  | 3.11881  |
| C | -2.49916 | -1.56218 | 0.74888  |
| C | -3.38001 | -2.79693 | 0.87374  |
| H | -1.42973 | -1.99143 | 2.63917  |
| H | -1.21729 | -2.47418 | -2.37001 |
| C | -1.92906 | -3.88533 | -0.78594 |
| C | 2.75923  | -1.98538 | -1.96379 |
| C | 3.19957  | 0.39826  | -2.20434 |
| C | 2.53936  | 2.53259  | -1.00073 |
| C | 1.17125  | 3.23656  | 0.88818  |
| H | -1.46699 | 1.67228  | -2.16401 |
| C | -2.27865 | 0.16305  | -3.43308 |
| C | -3.44001 | 1.36821  | -1.46292 |
| H | -3.18487 | -1.26383 | -1.23646 |
| H | -3.45825 | 1.90353  | 2.87497  |
| H | -2.32469 | 3.24640  | 2.67543  |
| H | -2.36645 | 2.34667  | 4.20050  |
| H | -2.98779 | -0.67417 | 1.14459  |
| H | -4.20261 | -2.79047 | 1.57583  |
| C | -3.05682 | -3.89035 | 0.16990  |
| H | -1.86656 | -4.73201 | -1.45312 |
| H | 2.03075  | -2.77802 | -1.88444 |
| C | 4.12531  | -2.24901 | -1.95959 |
| C | 4.56845  | 0.11114  | -2.20525 |
| C | 2.68835  | 1.81783  | -2.33006 |
| C | 3.59880  | 3.26779  | -0.45697 |
| C | 2.23474  | 3.96957  | 1.40417  |
| H | 0.21105  | 3.21796  | 1.38027  |
| H | -2.88976 | -0.74081 | -3.40519 |
| H | -1.28586 | -0.10970 | -3.78941 |
| H | -2.73133 | 0.85274  | -4.14644 |
| C | -3.34572 | 2.32164  | -0.44094 |
| C | -4.70429 | 0.93788  | -1.86637 |
| H | -3.62333 | -4.80633 | 0.27442  |
| H | 4.47880  | -3.26679 | -1.87442 |
| C | 5.03290  | -1.19587 | -2.07354 |
| H | 5.27613  | 0.92247  | -2.31566 |
| H | 1.72520  | 1.80701  | -2.83972 |
| H | 3.38083  | 2.38646  | -2.95104 |
| H | 4.54043  | 3.30092  | -0.98958 |
| C | 3.45883  | 3.97185  | 0.73594  |
| H | 2.10880  | 4.53674  | 2.31553  |
| H | -2.36271 | 2.66418  | -0.13943 |
| C | -4.49001 | 2.83396  | 0.16110  |
| C | -5.85471 | 1.44185  | -1.25524 |
| H | -4.80559 | 0.21555  | -2.66482 |

|   |          |          |          |
|---|----------|----------|----------|
| H | 6.09549  | -1.39236 | -2.07350 |
| H | 4.29236  | 4.53540  | 1.13011  |
| H | -4.40681 | 3.58979  | 0.93110  |
| C | -5.75142 | 2.38914  | -0.24161 |
| H | -6.82749 | 1.09780  | -1.57873 |
| H | -6.64254 | 2.78773  | 0.22328  |

(*C,R,S*)-L<sub>BB</sub>RuCp(NCMe)

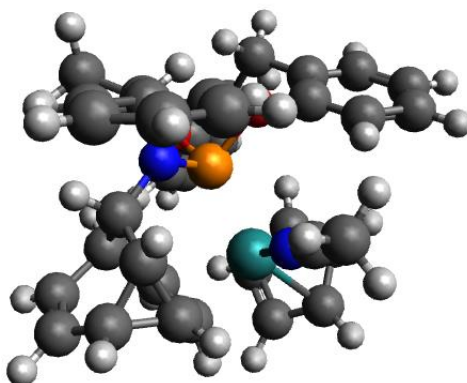

**Table S29.** Coordinates and energy for the optimised geometry of (*C,R,S*)-L<sub>BB</sub>RuCp(NCMe).

| <i>E</i> = -2127.06948882 |          |          |          |
|---------------------------|----------|----------|----------|
| Coordinates / Å           |          |          |          |
| Atom                      | x        | y        | z        |
| Ru                        | 0.64828  | -1.10290 | 1.23123  |
| P                         | 0.15447  | 0.16891  | -0.61057 |
| N                         | -0.70112 | 0.10004  | 2.17120  |
| C                         | -1.06820 | -2.56021 | 1.25246  |
| C                         | -0.46237 | -2.65256 | -0.01159 |
| C                         | 2.89868  | -0.84140 | 1.14913  |
| C                         | 2.40313  | -0.37830 | 2.40186  |
| C                         | 1.81369  | -1.50631 | 3.08698  |
| C                         | 1.93170  | -2.63849 | 2.23792  |
| C                         | 2.57762  | -2.22883 | 1.02163  |
| O                         | 1.04368  | -0.07082 | -2.10602 |
| O                         | 0.34443  | 1.89444  | -0.43996 |
| N                         | -1.42668 | 0.14780  | -1.17557 |
| C                         | -1.47492 | 0.77951  | 2.69307  |
| C                         | -2.44394 | -2.01779 | 1.35173  |
| H                         | -0.78621 | -3.25694 | 2.03075  |
| H                         | 0.30118  | -3.40057 | -0.17894 |
| C                         | -1.32202 | -2.36062 | -1.24571 |
| H                         | 3.42503  | -0.24815 | 0.42208  |
| H                         | 2.50638  | 0.62038  | 2.78665  |
| H                         | 1.38186  | -1.49405 | 4.07206  |
| H                         | 1.59184  | -3.63471 | 2.46158  |
| H                         | 2.84721  | -2.86425 | 0.19863  |

|   |          |          |          |
|---|----------|----------|----------|
| C | 2.41734  | -0.32695 | -2.15166 |
| C | 1.45620  | 2.45024  | 0.21399  |
| C | -1.98172 | 1.24988  | -2.00500 |
| C | -2.20311 | -1.10069 | -1.06669 |
| C | -2.46630 | 1.62104  | 3.33349  |
| C | -3.02272 | -1.22921 | 0.20424  |
| C | -3.57455 | -2.62440 | 0.45819  |
| H | -2.77260 | -1.75184 | 2.34599  |
| H | -0.70435 | -2.24112 | -2.13370 |
| C | -2.23021 | -3.57130 | -1.36456 |
| C | 2.84055  | -1.64144 | -2.31147 |
| C | 3.32284  | 0.73360  | -2.06501 |
| C | 2.67444  | 2.58142  | -0.45797 |
| C | 1.28565  | 2.90281  | 1.51750  |
| H | -1.27754 | 2.07403  | -1.90518 |
| C | -2.04727 | 0.87137  | -3.48508 |
| C | -3.29002 | 1.70198  | -1.37381 |
| H | -2.90089 | -1.08920 | -1.90455 |
| H | -3.43316 | 1.48054  | 2.85106  |
| H | -2.18646 | 2.67040  | 3.24599  |
| H | -2.55514 | 1.36843  | 4.38900  |
| H | -3.66450 | -0.38877 | 0.42443  |
| H | -4.53782 | -2.68923 | 0.94218  |
| C | -3.27207 | -3.67932 | -0.53114 |
| H | -1.98733 | -4.34084 | -2.08443 |
| H | 2.09860  | -2.42291 | -2.39191 |
| C | 4.20255  | -1.92304 | -2.36105 |
| C | 4.68642  | 0.42918  | -2.11865 |
| C | 2.83693  | 2.15848  | -1.90514 |
| C | 3.74362  | 3.14069  | 0.25053  |
| C | 2.35990  | 3.46539  | 2.19878  |
| H | 0.31332  | 2.81361  | 1.97748  |
| H | -2.67757 | 0.00191  | -3.67666 |
| H | -1.04182 | 0.64352  | -3.83618 |
| H | -2.44346 | 1.70537  | -4.06586 |
| C | -3.22972 | 2.48093  | -0.21136 |
| C | -4.53822 | 1.32601  | -1.86943 |
| H | -3.92132 | -4.54464 | -0.56087 |
| H | 4.53864  | -2.94274 | -2.48535 |
| C | 5.12818  | -0.88512 | -2.25561 |
| H | 5.40655  | 1.23497  | -2.05874 |
| H | 1.88467  | 2.27373  | -2.42225 |
| H | 3.55286  | 2.82777  | -2.38279 |
| H | 4.69785  | 3.25309  | -0.24749 |
| C | 3.59838  | 3.57062  | 1.56655  |
| H | 2.23051  | 3.82189  | 3.21090  |



|   |          |          |          |
|---|----------|----------|----------|
| H | -2.25878 | 2.77805  | 0.16782  |
| C | -4.39378 | 2.87019  | 0.44340  |
| C | -5.70802 | 1.70593  | -1.20822 |
| H | -4.61041 | 0.73624  | -2.77293 |
| H | 6.18730  | -1.09612 | -2.29387 |
| H | 4.44012  | 4.00293  | 2.08842  |
| H | -4.33737 | 3.49258  | 1.32690  |
| C | -5.63937 | 2.47562  | -0.05066 |
| H | -6.66875 | 1.40501  | -1.60275 |
| H | -6.54560 | 2.77824  | 0.45559  |

TS-(C,S,S)-to-(C,R,S)-L<sub>BB</sub>RuCp(NCMe)<sup>+</sup> (TS1-Ru)

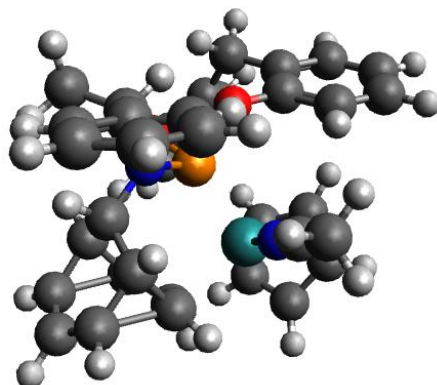

**Table S30.** Coordinates, energy, and imaginary vibrational frequency for the optimised geometry of TS-(C,S,S)-to-(C,R,S)-L<sub>BB</sub>RuCp(NCMe)<sup>+</sup> (TS1-Ru).

| $E = -2127.03204166$ |                 |          |          |
|----------------------|-----------------|----------|----------|
| $\nu = -488.30$      |                 |          |          |
| Atom                 | Coordinates / Å |          |          |
|                      | x               | y        | z        |
| Ru                   | 0.75414         | -0.70878 | 1.48765  |
| P                    | 0.12193         | 0.07115  | -0.60237 |
| N                    | -0.68943        | 0.57296  | 2.18462  |
| C                    | -0.72710        | -2.56545 | 1.34942  |
| C                    | -0.48898        | -2.99106 | 0.01687  |
| C                    | 2.94654         | -1.03365 | 1.18352  |
| C                    | 2.73408         | 0.18872  | 1.91789  |
| C                    | 2.10870         | -0.16135 | 3.15702  |
| C                    | 1.88714         | -1.56865 | 3.18019  |
| C                    | 2.41442         | -2.10722 | 1.94219  |
| O                    | 0.93016         | -0.46775 | -2.07971 |
| O                    | 0.27101         | 1.79946  | -0.83311 |
| N                    | -1.49082        | -0.08020 | -1.10759 |
| C                    | -1.47171        | 1.31896  | 2.59483  |
| C                    | -1.93206        | -1.88960 | 1.63965  |
| H                    | -0.26815        | -3.13650 | 2.14574  |
| H                    | 0.38775         | -3.57714 | -0.21120 |

|   |          |          |          |
|---|----------|----------|----------|
| C | -1.37279 | -2.56867 | -1.10991 |
| H | 3.45037  | -1.11773 | 0.23959  |
| H | 3.07070  | 1.16778  | 1.62949  |
| H | 1.82106  | 0.53289  | 3.92765  |
| H | 1.46594  | -2.13413 | 3.99213  |
| H | 2.43674  | -3.14640 | 1.66463  |
| C | 2.29686  | -0.74913 | -2.12242 |
| C | 1.37551  | 2.49177  | -0.31505 |
| C | -2.09404 | 0.85940  | -2.09105 |
| C | -2.22370 | -1.32994 | -0.84302 |
| C | -2.47614 | 2.23425  | 3.10183  |
| C | -2.83169 | -1.40897 | 0.55569  |
| C | -3.48183 | -2.73734 | 0.84801  |
| H | -2.18022 | -1.65191 | 2.66195  |
| H | -0.90390 | -2.54352 | -2.08576 |
| C | -2.03523 | -3.86500 | -0.74537 |
| C | 2.69447  | -2.08235 | -2.10786 |
| C | 3.22331  | 0.29516  | -2.19657 |
| C | 2.60156  | 2.45967  | -0.98502 |
| C | 1.19759  | 3.21886  | 0.85610  |
| H | -1.41650 | 1.70887  | -2.13762 |
| C | -2.16594 | 0.24796  | -3.49112 |
| C | -3.40806 | 1.36968  | -1.51717 |
| H | -3.05706 | -1.34644 | -1.54457 |
| H | -3.41887 | 2.06770  | 2.58172  |
| H | -2.17028 | 3.26749  | 2.94054  |
| H | -2.62811 | 2.07827  | 4.16895  |
| H | -3.43673 | -0.54048 | 0.78818  |
| H | -4.29908 | -2.76631 | 1.55223  |
| C | -3.10021 | -3.87907 | 0.15269  |
| H | -1.74189 | -4.75921 | -1.27284 |
| H | 1.93628  | -2.85143 | -2.08200 |
| C | 4.04960  | -2.39735 | -2.12608 |
| C | 4.58050  | -0.04321 | -2.20724 |
| C | 2.76578  | 1.73614  | -2.30677 |
| C | 3.66862  | 3.15778  | -0.40840 |
| C | 2.27045  | 3.91031  | 1.40854  |
| H | 0.22093  | 3.23149  | 1.31544  |
| H | -2.77186 | -0.65878 | -3.53296 |
| H | -1.15738 | -0.00453 | -3.81584 |
| H | -2.59307 | 0.96666  | -4.19173 |
| C | -3.35567 | 2.32219  | -0.49100 |
| C | -4.65381 | 0.90872  | -1.94338 |
| H | -3.57713 | -4.82109 | 0.38689  |
| H | 4.36505  | -3.43092 | -2.11394 |
| C | 4.99601  | -1.37253 | -2.15982 |

|   |          |          |          |
|---|----------|----------|----------|
| H | 5.31871  | 0.74609  | -2.26668 |
| H | 1.81762  | 1.76251  | -2.84381 |
| H | 3.49426  | 2.28259  | -2.90666 |
| H | 4.62790  | 3.15336  | -0.90940 |
| C | 3.51518  | 3.86770  | 0.77997  |
| H | 2.13761  | 4.47899  | 2.31791  |
| H | -2.38698 | 2.68569  | -0.16742 |
| C | -4.52336 | 2.80554  | 0.09097  |
| C | -5.82718 | 1.38089  | -1.35081 |
| H | -4.72243 | 0.18721  | -2.74633 |
| H | 6.05071  | -1.60752 | -2.16862 |
| H | 4.35581  | 4.39931  | 1.20244  |
| H | -4.47304 | 3.56440  | 0.86106  |
| C | -5.76575 | 2.32866  | -0.33393 |
| H | -6.78517 | 1.01368  | -1.69242 |
| H | -6.67477 | 2.70429  | 0.11503  |

(*A,S,S*)-**L<sub>BB</sub>**RuCp(NCMe)<sup>+</sup>

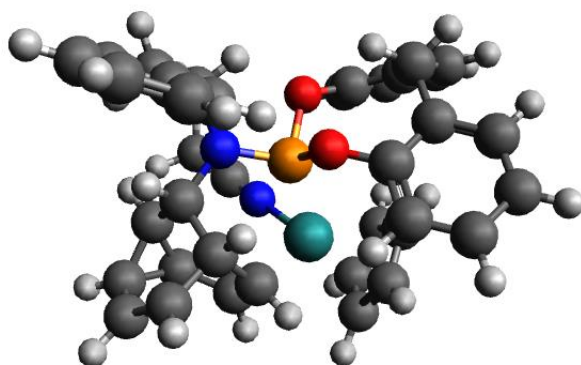

**Table S31.** Coordinates and energy for the optimised geometry of (*A,S,S*)-**L<sub>BB</sub>**RuCp(NCMe)<sup>+</sup>.

| <i>E</i> = -2127.06691106 |          |          |          |
|---------------------------|----------|----------|----------|
| Coordinates / Å           |          |          |          |
| Atom                      | x        | y        | z        |
| Ru                        | -0.99901 | -1.53485 | -0.65459 |
| P                         | 0.03819  | 0.26085  | 0.31864  |
| N                         | -0.55484 | -2.47013 | 1.10313  |
| C                         | 0.75343  | -2.72287 | -1.41788 |
| C                         | 1.75053  | -3.19335 | -0.42828 |
| C                         | -3.20637 | -1.60752 | -0.35058 |
| C                         | -2.93355 | -0.47468 | -1.16958 |
| C                         | -2.30685 | -0.92859 | -2.37254 |
| C                         | -2.25027 | -2.36280 | -2.31758 |
| C                         | -2.79276 | -2.78745 | -1.07547 |
| O                         | -0.58139 | 0.78621  | 1.86102  |
| O                         | 0.05764  | 1.80369  | -0.51474 |
| N                         | 1.66070  | 0.10580  | 0.73430  |
| C                         | -0.27926 | -2.97260 | 2.10548  |

|   |          |          |          |
|---|----------|----------|----------|
| C | 0.87970  | -1.42781 | -1.94628 |
| H | 0.28482  | -3.49783 | -2.00984 |
| H | 1.48374  | -4.08817 | 0.11523  |
| C | 2.62329  | -2.19045 | 0.28484  |
| H | -3.68693 | -1.58333 | 0.61073  |
| H | -3.15895 | 0.54858  | -0.92446 |
| H | -2.01260 | -0.31111 | -3.20045 |
| H | -1.85793 | -3.00290 | -3.08850 |
| H | -2.89954 | -3.80519 | -0.74438 |
| C | -1.96376 | 0.87332  | 2.10221  |
| C | -1.01558 | 2.32097  | -1.24425 |
| C | 2.30047  | 0.97567  | 1.75733  |
| C | 2.53003  | -0.72899 | -0.11638 |
| C | 0.09695  | -3.60015 | 3.35761  |
| C | 2.14656  | -0.63217 | -1.61355 |
| C | 3.23575  | -1.29698 | -2.43497 |
| H | 0.47171  | -1.21457 | -2.92572 |
| H | 2.86661  | -2.37795 | 1.32042  |
| C | 3.27352  | -3.08900 | -0.75857 |
| C | -2.56379 | -0.15046 | 2.82725  |
| C | -2.68839 | 1.98452  | 1.66179  |
| C | -2.04785 | 2.98511  | -0.57724 |
| C | -0.99612 | 2.19137  | -2.62786 |
| H | 1.52141  | 1.65696  | 2.09962  |
| C | 2.72706  | 0.13212  | 2.95800  |
| C | 3.41065  | 1.81610  | 1.12852  |
| H | 3.52520  | -0.29110 | -0.02240 |
| H | 1.06711  | -4.08538 | 3.25456  |
| H | -0.63910 | -4.34974 | 3.64435  |
| H | 0.16492  | -2.85578 | 4.14998  |
| H | 2.03417  | 0.41600  | -1.88332 |
| H | 3.55284  | -0.83322 | -3.35880 |
| C | 3.73373  | -2.46686 | -2.01778 |
| H | 3.86572  | -3.91496 | -0.39315 |
| H | -1.95500 | -0.97024 | 3.17595  |
| C | -3.92722 | -0.09990 | 3.09711  |
| C | -4.06021 | 2.00999  | 1.93810  |
| C | -2.02470 | 3.13463  | 0.92960  |
| C | -3.09405 | 3.49681  | -1.35087 |
| C | -2.04820 | 2.70705  | -3.37897 |
| H | -0.15899 | 1.69012  | -3.09306 |
| H | 3.50812  | -0.58337 | 2.69390  |
| H | 1.86096  | -0.41594 | 3.32641  |
| H | 3.10212  | 0.76505  | 3.76306  |
| C | 3.09492  | 2.64514  | 0.04319  |
| C | 4.72631  | 1.79331  | 1.59562  |

|   |          |          |          |
|---|----------|----------|----------|
| H | 4.48839  | -2.98828 | -2.59181 |
| H | -4.39522 | -0.89243 | 3.66375  |
| C | -4.68110 | 0.97959  | 2.63814  |
| H | -4.64297 | 2.86122  | 1.61115  |
| H | -0.99165 | 3.22616  | 1.26456  |
| H | -2.53901 | 4.05769  | 1.19765  |
| H | -3.90312 | 4.02203  | -0.86016 |
| C | -3.10422 | 3.35330  | -2.73694 |
| H | -2.04096 | 2.61090  | -4.45549 |
| H | 2.07727  | 2.65991  | -0.32582 |
| C | 4.07392  | 3.42777  | -0.55926 |
| C | 5.70941  | 2.57968  | 0.99096  |
| H | 5.00151  | 1.16703  | 2.43243  |
| H | -5.74152 | 1.02784  | 2.84037  |
| H | -3.92357 | 3.75784  | -3.31377 |
| H | 3.81347  | 4.06464  | -1.39398 |
| C | 5.38755  | 3.39714  | -0.08745 |
| H | 6.72344  | 2.54957  | 1.36587  |
| H | 6.14888  | 4.00573  | -0.55575 |

(*A,R,S*)-**L<sub>BB</sub>**RuCp(NCMe)<sup>+</sup>

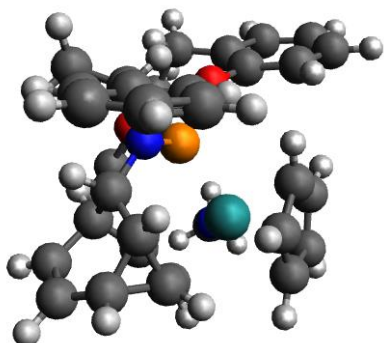

**Table S32.** Coordinates and energy for the optimised geometry of (*A,R,S*)-**L<sub>BB</sub>**RuCp(NCMe)<sup>+</sup>.

| <i>E</i> = -2127.04592739 |          |          |          |
|---------------------------|----------|----------|----------|
| Coordinates / Å           |          |          |          |
| Atom                      | x        | y        | z        |
| Ru                        | -0.32696 | 1.07217  | 1.41436  |
| P                         | -0.08057 | -0.39612 | -0.33043 |
| N                         | -2.11839 | 1.86243  | 0.80024  |
| C                         | 1.15698  | 2.76314  | 0.78295  |
| C                         | 0.50120  | 2.44858  | -0.39483 |
| C                         | -0.95059 | 1.28579  | 3.56626  |
| C                         | -1.05795 | -0.08667 | 3.14594  |
| C                         | 0.27154  | -0.53239 | 2.82762  |
| C                         | 1.16905  | 0.55258  | 2.98928  |
| C                         | 0.40209  | 1.68585  | 3.46126  |
| O                         | -0.87736 | -0.16913 | -1.88990 |

|   |          |          |          |
|---|----------|----------|----------|
| O | -0.39858 | -2.09182 | -0.08210 |
| N | 1.52821  | -0.51169 | -0.85096 |
| C | -3.19324 | 2.24056  | 0.60883  |
| C | 2.56468  | 2.34293  | 0.95435  |
| H | 0.79200  | 3.57341  | 1.39924  |
| H | -0.40780 | 2.97302  | -0.65470 |
| C | 1.32014  | 1.89077  | -1.56074 |
| H | -1.76933 | 1.91074  | 3.87741  |
| H | -1.94560 | -0.69229 | 3.15461  |
| H | 0.55526  | -1.51721 | 2.50889  |
| H | 2.23238  | 0.50427  | 2.85495  |
| H | 0.79737  | 2.65267  | 3.71754  |
| C | -2.20721 | 0.16684  | -2.13348 |
| C | -1.60617 | -2.58548 | 0.45226  |
| C | 2.07396  | -1.73832 | -1.49225 |
| C | 2.26061  | 0.75502  | -1.09268 |
| C | -4.55428 | 2.68200  | 0.37243  |
| C | 3.12107  | 1.26354  | 0.05300  |
| C | 3.63018  | 2.68549  | -0.13922 |
| H | 2.95298  | 2.39954  | 1.96003  |
| H | 0.67318  | 1.51375  | -2.34612 |
| C | 2.15115  | 3.05857  | -2.05330 |
| C | -2.51167 | 1.46809  | -2.52267 |
| C | -3.18161 | -0.83156 | -2.08927 |
| C | -2.77001 | -2.63315 | -0.32202 |
| C | -1.57658 | -3.10537 | 1.74308  |
| H | 1.46702  | -2.55907 | -1.11415 |
| C | 1.92046  | -1.70501 | -3.01380 |
| C | 3.48975  | -1.94108 | -0.97201 |
| H | 2.93469  | 0.54682  | -1.92437 |
| H | -4.57072 | 3.46746  | -0.38093 |
| H | -4.99255 | 3.06458  | 1.29317  |
| H | -5.15291 | 1.84768  | 0.00970  |
| H | 3.80255  | 0.54218  | 0.47941  |
| H | 4.60881  | 2.91153  | 0.25708  |
| C | 3.23489  | 3.41931  | -1.35626 |
| H | 1.82636  | 3.59576  | -2.93382 |
| H | -1.71828 | 2.19851  | -2.59001 |
| C | -3.82472 | 1.79886  | -2.84331 |
| C | -4.49746 | -0.47647 | -2.40198 |
| C | -2.78507 | -2.25893 | -1.78935 |
| C | -3.92983 | -3.13039 | 0.28454  |
| C | -2.73801 | -3.60598 | 2.32033  |
| H | -0.64118 | -3.14137 | 2.27867  |
| H | 2.42416  | -0.84959 | -3.46718 |
| H | 0.86243  | -1.63898 | -3.26324 |

|   |          |          |          |
|---|----------|----------|----------|
| H | 2.33186  | -2.61364 | -3.45554 |
| C | 3.65409  | -2.30704 | 0.36951  |
| C | 4.62450  | -1.73239 | -1.75506 |
| H | 3.83995  | 4.26399  | -1.65840 |
| H | -4.06441 | 2.80417  | -3.16120 |
| C | -4.82343 | 0.82692  | -2.77038 |
| H | -5.26532 | -1.23948 | -2.38776 |
| H | -1.79599 | -2.44170 | -2.21066 |
| H | -3.48185 | -2.92557 | -2.29814 |
| H | -4.84048 | -3.17481 | -0.29872 |
| C | -3.92809 | -3.59639 | 1.59495  |
| H | -2.70853 | -4.00985 | 3.32226  |
| H | 2.77308  | -2.46712 | 0.97858  |
| C | 4.92227  | -2.45276 | 0.91977  |
| C | 5.90106  | -1.87479 | -1.20577 |
| H | 4.52620  | -1.45857 | -2.79663 |
| H | -5.84395 | 1.07634  | -3.02483 |
| H | -4.83818 | -3.97909 | 2.03428  |
| H | 5.03349  | -2.74193 | 1.95611  |
| C | 6.05348  | -2.23148 | 0.13045  |
| H | 6.77187  | -1.70841 | -1.82495 |
| H | 7.04189  | -2.34401 | 0.55415  |

TS-(*A,S,S*)-to-(*A,R,S*)-**L<sub>BB</sub>**RuCp(NCMe)<sup>+</sup> (TS5-Ru)

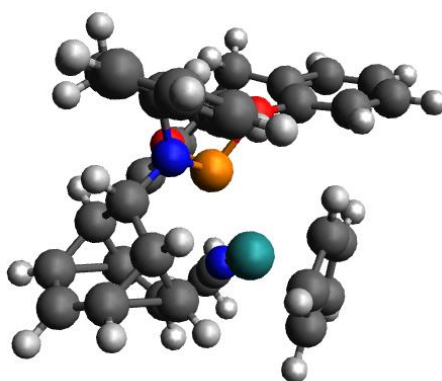

**Table S33.** Coordinates, energy, and imaginary vibrational frequency for the optimised geometry of TS-(*A,S,S*)-to-(*A,R,S*)-**L<sub>BB</sub>**RuCp(NCMe)<sup>+</sup> (TS5-Ru).

| $E = -2127.0202577$ |          |          |          |
|---------------------|----------|----------|----------|
| $\nu = -476.80$     |          |          |          |
| Coordinates / Å     |          |          |          |
| Atom                | x        | y        | z        |
| Ru                  | -0.49485 | 1.08262  | 1.49954  |
| P                   | 0.00545  | -0.33096 | -0.26734 |
| N                   | -2.09506 | 1.97516  | 0.58038  |
| C                   | 0.71836  | 2.86697  | 0.46463  |

|   |          |          |          |
|---|----------|----------|----------|
| C | 0.56341  | 2.76221  | -0.94426 |
| C | -1.59599 | 1.18025  | 3.43555  |
| C | -1.39090 | -0.19020 | 3.06379  |
| C | 0.03559  | -0.41043 | 3.04787  |
| C | 0.68497  | 0.80777  | 3.36927  |
| C | -0.33364 | 1.81078  | 3.59847  |
| O | -0.77295 | -0.18316 | -1.85268 |
| O | -0.14548 | -2.04789 | -0.00619 |
| N | 1.61205  | -0.36106 | -0.82574 |
| C | -3.06700 | 2.50315  | 0.24603  |
| C | 1.90862  | 2.36736  | 1.04359  |
| H | 0.21925  | 3.68915  | 0.96064  |
| H | -0.30672 | 3.18732  | -1.41975 |
| C | 1.50228  | 1.94765  | -1.77615 |
| H | -2.55398 | 1.66210  | 3.52847  |
| H | -2.15220 | -0.93387 | 2.91859  |
| H | 0.53797  | -1.33810 | 2.85000  |
| H | 1.74555  | 0.93141  | 3.48655  |
| H | -0.16589 | 2.83148  | 3.89352  |
| C | -2.12299 | -0.03635 | -2.15855 |
| C | -1.28294 | -2.69966 | 0.49794  |
| C | 2.17759  | -1.54093 | -1.53415 |
| C | 2.32936  | 0.91253  | -1.01562 |
| C | -4.29759 | 3.15526  | -0.15924 |
| C | 2.85852  | 1.52106  | 0.27944  |
| C | 3.48600  | 2.87224  | 0.09215  |
| H | 2.13403  | 2.58614  | 2.07352  |
| H | 1.08346  | 1.55021  | -2.69141 |
| C | 2.14622  | 3.30095  | -1.88583 |
| C | -2.56589 | 1.19591  | -2.63177 |
| C | -2.97352 | -1.14296 | -2.10415 |
| C | -2.41243 | -2.88908 | -0.30376 |
| C | -1.20585 | -3.24068 | 1.77761  |
| H | 1.54407  | -2.38037 | -1.25553 |
| C | 2.10247  | -1.38003 | -3.05323 |
| C | 3.56347  | -1.80955 | -0.96148 |
| H | 3.20312  | 0.67206  | -1.62135 |
| H | -4.99774 | 2.41629  | -0.54573 |
| H | -4.09889 | 3.88599  | -0.94199 |
| H | -4.75003 | 3.66622  | 0.68975  |
| H | 3.44029  | 0.81511  | 0.85932  |
| H | 4.25847  | 3.17672  | 0.78200  |
| C | 3.16243  | 3.66540  | -0.99550 |
| H | 1.89539  | 3.92637  | -2.72830 |
| H | -1.85892 | 2.00885  | -2.71451 |
| C | -3.89534 | 1.35260  | -3.00994 |



|   |          |          |          |
|---|----------|----------|----------|
| C | -4.31196 | -0.95878 | -2.46618 |
| C | -2.42536 | -2.51133 | -1.76922 |
| C | -3.50875 | -3.54553 | 0.26767  |
| C | -2.30127 | -3.90337 | 2.31970  |
| H | -0.28270 | -3.15881 | 2.32946  |
| H | 2.68768  | -0.53192 | -3.41506 |
| H | 1.06314  | -1.22321 | -3.33738 |
| H | 2.47122  | -2.27891 | -3.54934 |
| C | 3.66607  | -2.09319 | 0.40696  |
| C | 4.72727  | -1.77354 | -1.72893 |
| H | 3.62912  | 4.63551  | -1.09878 |
| H | -4.23748 | 2.30321  | -3.39531 |
| C | -4.77818 | 0.27710  | -2.90624 |
| H | -4.98475 | -1.80616 | -2.43526 |
| H | -1.40748 | -2.57941 | -2.15623 |
| H | -3.02039 | -3.25573 | -2.29966 |
| H | -4.39320 | -3.70128 | -0.33650 |
| C | -3.46956 | -4.03297 | 1.57012  |
| H | -2.23813 | -4.32174 | 3.31413  |
| H | 2.76099  | -2.11975 | 1.00168  |
| C | 4.90271  | -2.33097 | 0.99469  |
| C | 5.97272  | -2.00953 | -1.14046 |
| H | 4.67657  | -1.56547 | -2.78874 |
| H | -5.81250 | 0.39185  | -3.19828 |
| H | -4.32917 | -4.54092 | 1.98354  |
| H | 4.96573  | -2.55577 | 2.05102  |
| C | 6.06441  | -2.28642 | 0.21938  |
| H | 6.86633  | -1.97715 | -1.74872 |
| H | 7.02831  | -2.47076 | 0.67331  |

MeCN

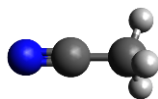

**Table S34.** Coordinates and energy for the optimised geometry of MeCN.

| $E = -132.746768071$ |          |          |          |
|----------------------|----------|----------|----------|
| Coordinates / Å      |          |          |          |
| Atom                 | x        | y        | z        |
| N                    | 1.42981  | 0.00024  | 0.00004  |
| C                    | 0.27973  | -0.00051 | -0.00011 |
| C                    | -1.17532 | 0.00012  | 0.00001  |
| H                    | -1.54500 | 0.79840  | -0.64457 |
| H                    | -1.54483 | 0.15946  | 1.01364  |
| H                    | -1.54527 | -0.95723 | -0.36876 |

(*R,R,S*)-L<sub>BB</sub>RuCp<sup>+</sup>

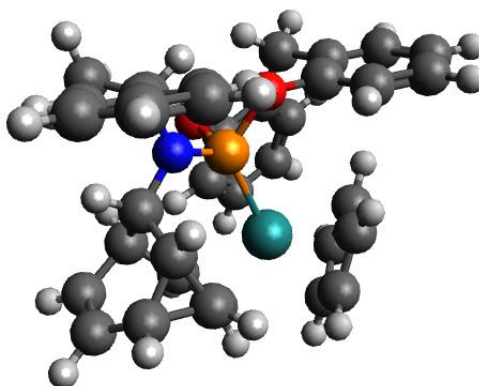

**Table S35.** Coordinates and energy for the optimised geometry of (*R,R,S*)-L<sub>BB</sub>RuCp<sup>+</sup>.

| <i>E</i> = -1994.30367684 |          |          |          |
|---------------------------|----------|----------|----------|
| Coordinates / Å           |          |          |          |
| Atom                      | x        | y        | z        |
| Ru                        | -1.07163 | -1.34785 | -0.67357 |
| P                         | 0.03675  | 0.33244  | 0.52687  |
| C                         | 0.73087  | -2.73468 | -1.10081 |
| C                         | 0.54103  | -2.69877 | 0.27328  |
| C                         | -3.14116 | -1.51937 | -1.41697 |
| C                         | -2.68233 | -0.19092 | -1.66169 |
| C                         | -1.53922 | -0.28627 | -2.52824 |
| C                         | -1.32985 | -1.67257 | -2.83024 |
| C                         | -2.31852 | -2.44657 | -2.13631 |
| O                         | -0.68122 | 0.25900  | 2.15601  |
| O                         | -0.16778 | 2.02087  | 0.23370  |
| N                         | 1.67894  | 0.29774  | 0.82142  |
| C                         | 1.93071  | -2.11175 | -1.68581 |
| H                         | 0.24149  | -3.50277 | -1.68355 |
| H                         | -0.12190 | -3.43069 | 0.72641  |
| C                         | 1.69504  | -2.21488 | 1.15585  |
| H                         | -3.95768 | -1.78051 | -0.76618 |
| H                         | -3.13312 | 0.71218  | -1.29385 |
| H                         | -0.97420 | 0.53568  | -2.92683 |
| H                         | -0.57268 | -2.05342 | -3.49120 |
| H                         | -2.45664 | -3.51096 | -2.19340 |
| C                         | -2.01866 | -0.16168 | 2.09130  |
| C                         | -1.31045 | 2.58912  | -0.35564 |
| C                         | 2.39274  | 1.41278  | 1.50521  |
| C                         | 2.41162  | -0.96054 | 0.59647  |
| C                         | 2.79401  | -1.19427 | -0.85076 |
| C                         | 3.33475  | -2.57963 | -1.13636 |
| H                         | 1.91289  | -1.93655 | -2.75134 |
| H                         | 1.36240  | -2.01815 | 2.17291  |
| C                         | 2.67961  | -3.37230 | 1.09781  |

|   |          |          |          |
|---|----------|----------|----------|
| C | -2.29447 | -1.52658 | 2.15743  |
| C | -3.02314 | 0.79205  | 1.91252  |
| C | -2.50752 | 2.72424  | 0.35596  |
| C | -1.17410 | 3.04699  | -1.66145 |
| H | 1.70929  | 2.26043  | 1.47439  |
| C | 2.65939  | 1.07062  | 2.97112  |
| C | 3.61164  | 1.78654  | 0.67485  |
| H | 3.33713  | -0.85890 | 1.16348  |
| H | 3.26693  | -0.35614 | -1.34102 |
| H | 4.09636  | -2.66837 | -1.89608 |
| C | 3.41826  | -3.53157 | -0.00945 |
| H | 2.72273  | -4.06973 | 1.92279  |
| H | -1.48770 | -2.21621 | 2.36354  |
| C | -3.61835 | -1.96143 | 2.06322  |
| C | -4.33916 | 0.33341  | 1.82423  |
| C | -2.66475 | 2.26045  | 1.79277  |
| C | -3.58515 | 3.31322  | -0.31683 |
| C | -2.26108 | 3.62492  | -2.30823 |
| H | -0.21464 | 2.94746  | -2.14849 |
| H | 3.26332  | 0.16918  | 3.08819  |
| H | 1.70886  | 0.90965  | 3.47811  |
| H | 3.18377  | 1.89252  | 3.45981  |
| C | 3.40799  | 2.47385  | -0.52808 |
| C | 4.91168  | 1.43823  | 1.04133  |
| H | 4.09847  | -4.36710 | -0.10681 |
| H | -3.84564 | -3.01542 | 2.13668  |
| C | -4.63859 | -1.02838 | 1.89612  |
| H | -5.14017 | 1.05032  | 1.69784  |
| H | -1.74010 | 2.44591  | 2.33807  |
| H | -3.44831 | 2.85507  | 2.26265  |
| H | -4.52175 | 3.43760  | 0.21036  |
| C | -3.47511 | 3.74993  | -1.63444 |
| H | -2.15862 | 3.98006  | -3.32341 |
| H | 2.39879  | 2.74780  | -0.81048 |
| C | 4.48083  | 2.80006  | -1.35035 |
| C | 5.99076  | 1.76149  | 0.21596  |
| H | 5.09645  | 0.91960  | 1.97223  |
| H | -5.66658 | -1.35561 | 1.83337  |
| H | -4.32614 | 4.19921  | -2.12564 |
| H | 4.31137  | 3.33940  | -2.27240 |
| C | 5.77852  | 2.43986  | -0.98039 |
| H | 6.99350  | 1.48636  | 0.51270  |
| H | 6.61485  | 2.69382  | -1.61684 |

---

(*S,S,S*)-L<sub>BB</sub>RuCp<sup>+</sup>

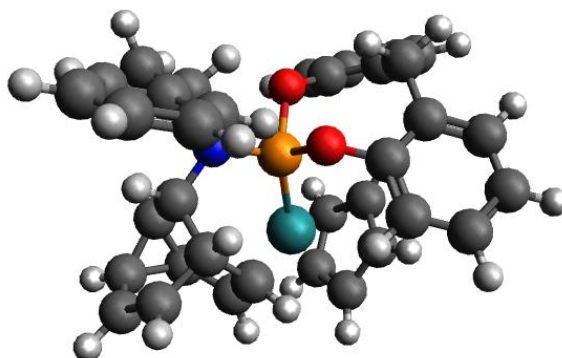

**Table S36.** Coordinates and energy for the optimised geometry of (*S,S,S*)-L<sub>BB</sub>RuCp<sup>+</sup>.

| <i>E</i> = -1994.31132599 |          |          |          |
|---------------------------|----------|----------|----------|
| Coordinates / Å           |          |          |          |
| Atom                      | x        | y        | z        |
| Ru                        | -0.88614 | -1.75543 | -0.10638 |
| P                         | 0.02251  | 0.31264  | 0.38025  |
| C                         | 0.69624  | -3.05914 | -0.71243 |
| C                         | 1.29325  | -3.24113 | 0.62151  |
| C                         | -2.88972 | -2.26399 | 0.76452  |
| C                         | -3.04001 | -1.11797 | -0.05086 |
| C                         | -2.61952 | -1.45306 | -1.38873 |
| C                         | -2.28742 | -2.85224 | -1.39563 |
| C                         | -2.41962 | -3.34760 | -0.06731 |
| O                         | -0.62104 | 1.26760  | 1.68415  |
| O                         | 0.02621  | 1.54986  | -0.85841 |
| N                         | 1.62425  | 0.27752  | 0.86477  |
| C                         | 1.03321  | -1.89883 | -1.42370 |
| H                         | 0.27696  | -3.92526 | -1.20304 |
| H                         | 0.79626  | -3.92729 | 1.29219  |
| C                         | 2.18148  | -2.14521 | 1.24517  |
| H                         | -3.10925 | -2.31892 | 1.81577  |
| H                         | -3.40959 | -0.15968 | 0.26572  |
| H                         | -2.65119 | -0.80029 | -2.24174 |
| H                         | -1.96783 | -3.41365 | -2.25599 |
| H                         | -2.23717 | -4.35685 | 0.25712  |
| C                         | -1.99883 | 1.35067  | 1.93307  |
| C                         | -1.07179 | 1.72793  | -1.71124 |
| C                         | 2.28781  | 1.42050  | 1.54775  |
| C                         | 2.43920  | -0.86931 | 0.46236  |
| C                         | 2.33805  | -1.18067 | -1.04883 |
| C                         | 3.43748  | -2.17295 | -1.38516 |
| H                         | 0.74024  | -1.82271 | -2.46332 |
| H                         | 2.12186  | -2.03412 | 2.31779  |
| C                         | 2.88567  | -3.34728 | 0.69921  |
| C                         | -2.52533 | 0.54730  | 2.93812  |

|   |          |          |          |
|---|----------|----------|----------|
| C | -2.79351 | 2.22416  | 1.18622  |
| C | -2.18130 | 2.45493  | -1.27221 |
| C | -0.99745 | 1.19235  | -2.99188 |
| H | 1.53956  | 2.21167  | 1.59889  |
| C | 2.64345  | 1.02761  | 2.98007  |
| C | 3.44907  | 1.92658  | 0.69600  |
| H | 3.47168  | -0.57258 | 0.65350  |
| H | 2.44691  | -0.25549 | -1.60875 |
| H | 3.98752  | -2.05776 | -2.30859 |
| C | 3.66340  | -3.19528 | -0.54803 |
| H | 3.22542  | -4.09502 | 1.39956  |
| H | -1.85859 | -0.09674 | 3.49348  |
| C | -3.89049 | 0.58898  | 3.20378  |
| C | -4.16289 | 2.25085  | 1.47331  |
| C | -2.20375 | 3.10122  | 0.10079  |
| C | -3.25181 | 2.59461  | -2.16224 |
| C | -2.07043 | 1.35227  | -3.86369 |
| H | -0.10179 | 0.66331  | -3.28444 |
| H | 3.35498  | 0.19970  | 3.01015  |
| H | 1.73531  | 0.72381  | 3.49845  |
| H | 3.08020  | 1.87142  | 3.51476  |
| C | 3.17623  | 2.39901  | -0.59512 |
| C | 4.76877  | 1.93243  | 1.15092  |
| H | 4.41153  | -3.94458 | -0.76689 |
| H | -4.30826 | -0.03076 | 3.98423  |
| C | -4.71233 | 1.43837  | 2.46258  |
| H | -4.80221 | 2.92197  | 0.91482  |
| H | -1.18731 | 3.38058  | 0.37746  |
| H | -2.79014 | 4.01831  | 0.04075  |
| H | -4.12255 | 3.15728  | -1.85173 |
| C | -3.20628 | 2.04384  | -3.44117 |
| H | -2.02008 | 0.94396  | -4.86314 |
| H | 2.15360  | 2.39192  | -0.95217 |
| C | 4.20261  | 2.86329  | -1.41055 |
| C | 5.79978  | 2.39774  | 0.33163  |
| H | 5.00798  | 1.58045  | 2.14467  |
| H | -5.77348 | 1.47737  | 2.66248  |
| H | -4.04452 | 2.17077  | -4.11136 |
| H | 3.97645  | 3.23069  | -2.40244 |
| C | 5.52066  | 2.86239  | -0.94943 |
| H | 6.81683  | 2.39669  | 0.69919  |
| H | 6.31886  | 3.22458  | -1.58255 |

---

TS-(*R,R,S*)-to-(*S,S,S*)-L<sub>BB</sub>RuCp<sup>+</sup> (TS3-Ru)

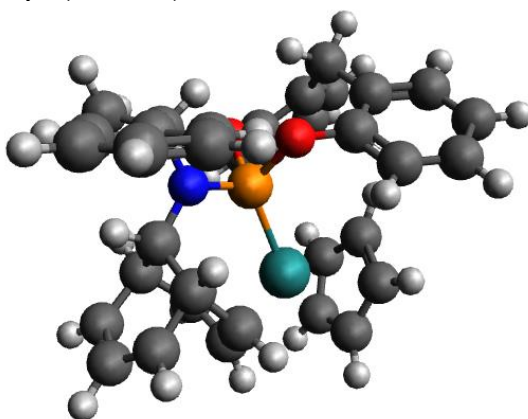

**Table S37.** Coordinates, energy, and imaginary vibrational frequency for the optimised geometry of TS-(*R,R,S*)-to-(*S,S,S*)-L<sub>BB</sub>RuCp<sup>+</sup> (TS3-Ru).

| <i>E</i> = -1994.30276175 |          |          |          |
|---------------------------|----------|----------|----------|
| <i>ν</i> = -177.23        |          |          |          |
| Coordinates / Å           |          |          |          |
| Atom                      | x        | y        | z        |
| Ru                        | -0.65053 | -1.63773 | -0.70371 |
| P                         | -0.02082 | 0.25176  | 0.42831  |
| C                         | 0.92646  | -3.03745 | -0.71124 |
| C                         | 0.80502  | -2.81329 | 0.68415  |
| C                         | -2.69497 | -0.89229 | -1.21497 |
| C                         | -2.06933 | -1.35499 | -2.40703 |
| C                         | -1.78896 | -2.75459 | -2.23912 |
| C                         | -2.24480 | -3.14627 | -0.94326 |
| C                         | -2.79135 | -1.99045 | -0.29325 |
| O                         | -0.79200 | 0.68740  | 1.93776  |
| O                         | -0.16916 | 1.81220  | -0.35515 |
| N                         | 1.58468  | 0.35915  | 0.88952  |
| C                         | 1.62084  | -2.03340 | -1.46025 |
| H                         | 0.61162  | -3.95755 | -1.17803 |
| H                         | 0.30444  | -3.56334 | 1.28295  |
| C                         | 1.95603  | -2.07525 | 1.40171  |
| H                         | -3.06684 | 0.10246  | -1.04546 |
| H                         | -1.87168 | -0.76511 | -3.28298 |
| H                         | -1.33580 | -3.39716 | -2.97341 |
| H                         | -2.18282 | -4.13375 | -0.51986 |
| H                         | -3.25213 | -1.95820 | 0.67635  |
| C                         | -2.17191 | 0.55729  | 2.14244  |
| C                         | -1.27868 | 2.15593  | -1.13585 |
| C                         | 2.17011  | 1.57949  | 1.50273  |
| C                         | 2.43215  | -0.79620 | 0.68562  |
| C                         | 2.68198  | -1.14157 | -0.78551 |
| C                         | 3.60560  | -2.27955 | -0.91393 |
| H                         | 1.67368  | -2.11368 | -2.53671 |

|   |          |          |          |
|---|----------|----------|----------|
| H | 1.69391  | -1.85431 | 2.43264  |
| C | 3.03720  | -3.10607 | 1.28837  |
| C | -2.62486 | -0.55448 | 2.84439  |
| C | -3.04377 | 1.55033  | 1.68677  |
| C | -2.43767 | 2.64068  | -0.52394 |
| C | -1.17698 | 2.01462  | -2.51503 |
| H | 1.39638  | 2.34369  | 1.43211  |
| C | 2.46831  | 1.34212  | 2.98196  |
| C | 3.34697  | 2.04079  | 0.65060  |
| H | 3.40231  | -0.53038 | 1.10802  |
| H | 2.93335  | -0.26841 | -1.37609 |
| H | 4.16583  | -2.39665 | -1.83148 |
| C | 3.78813  | -3.19747 | 0.14635  |
| H | 3.15827  | -3.83088 | 2.08278  |
| H | -1.90305 | -1.27963 | 3.19201  |
| C | -3.98736 | -0.71002 | 3.08064  |
| C | -4.40981 | 1.36841  | 1.92814  |
| C | -2.52712 | 2.78999  | 0.98090  |
| C | -3.51575 | 2.96779  | -1.35298 |
| C | -2.26365 | 2.34224  | -3.32016 |
| H | -0.25118 | 1.64595  | -2.93338 |
| H | 3.17684  | 0.52519  | 3.13569  |
| H | 1.53893  | 1.09151  | 3.49061  |
| H | 2.88634  | 2.24108  | 3.43639  |
| C | 3.08266  | 2.52082  | -0.63946 |
| C | 4.67024  | 1.97281  | 1.08786  |
| H | 4.49777  | -4.00166 | 0.02133  |
| H | -4.34574 | -1.56991 | 3.62877  |
| C | -4.88329 | 0.24967  | 2.60957  |
| H | -5.10757 | 2.12354  | 1.58984  |
| H | -1.54209 | 3.03910  | 1.37508  |
| H | -3.19315 | 3.62228  | 1.20960  |
| H | -4.42308 | 3.35205  | -0.90556 |
| C | -3.43887 | 2.81407  | -2.73555 |
| H | -2.19265 | 2.23456  | -4.39331 |
| H | 2.05403  | 2.57310  | -0.97445 |
| C | 4.12176  | 2.91854  | -1.47371 |
| C | 5.71516  | 2.36924  | 0.24945  |
| H | 4.89954  | 1.61924  | 2.08386  |
| H | -5.94331 | 0.13624  | 2.78682  |
| H | -4.28686 | 3.07214  | -3.35371 |
| H | 3.90373  | 3.29629  | -2.46353 |
| C | 5.44457  | 2.84016  | -1.03143 |
| H | 6.73577  | 2.31350  | 0.60272  |
| H | 6.25321  | 3.15165  | -1.67816 |

---

### 9.3 Conformational Search Results

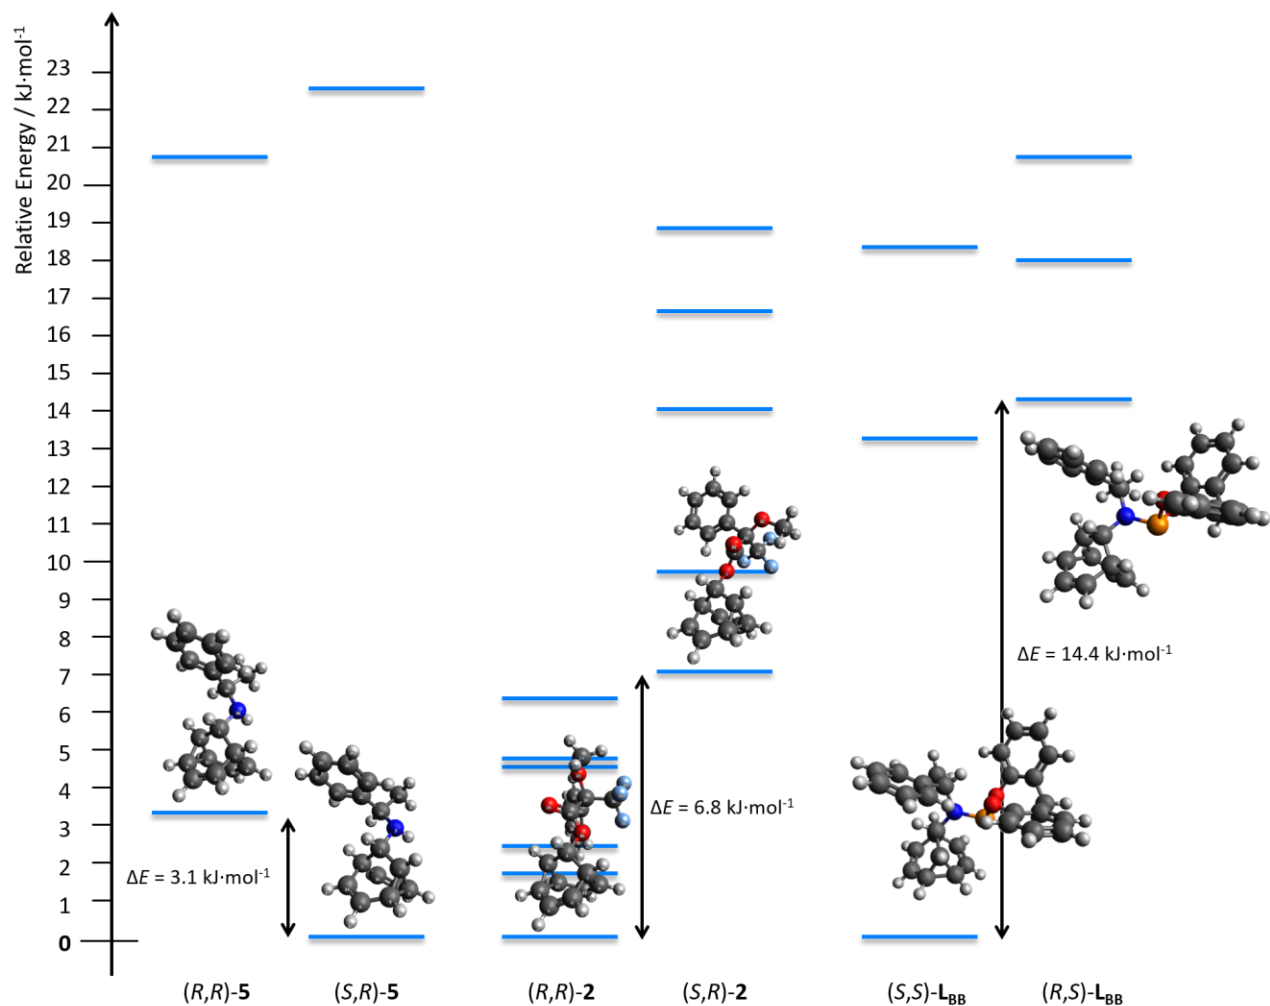

**Figure S70.** Relative energies of DFT optimised conformers of **2**, **5**, and **L<sub>BB</sub>**. The geometries of the minimum energy structures are shown.



## 9. References

- <sup>1</sup> Dolomanov, O. V.; Bourhis, L. J.; Gildea, R. J.; Howard, J. A. K.; Puschmann, H. *J. Appl. Crystallogr.* **2009**, *42*, 339.
- <sup>2</sup> Sheldrick, G. M. *Acta Crystallogr. Sect. A Found. Crystallogr.* **2008**, *64*, 112.
- <sup>3</sup> Ferrer, S.; Echavarren, A. M. *Angew. Chem. Int. Ed.* **2016**, *55*, 11178.
- <sup>4</sup> Dale, J. A.; Dull, D. A.; Mosher, H. S. *J. Org. Chem.* **1969**, *34*, 2543.
- <sup>5</sup> Wakabayashi, K.; Aikawa, K.; Kawauchi, S.; Mikami, K. *J. Am. Chem. Soc.* **2008**, *130*, 5012.
- <sup>6</sup> Nomenclature of Inorganic Chemistry, IUPAC Recommendations 2005; Connelly, N. G.; Damhus, T.; Hartshorn, R. M.; Hutton, A. T., Eds.; RSC Publishing: Cambridge, 2005.
- <sup>7</sup> Bauer, E. B. *Chem. Soc. Rev.* **2012**, *41*, 3153.
- <sup>8</sup> McGonigal, P. R.; de León, C.; Wang, Y.; Homs, A.; Solorio-Alvarado, C. R.; Echavarren, A. M. *Angew. Chem. Int. Ed.* **2012**, *51*, 13093.
- <sup>9</sup> Williams, A. T. R.; Winfield, S. A.; Miller, J. N. *Analyst.* **1983**, *108*, 1067.
- <sup>10</sup> Melhuish, W. H. *J. Phys. Chem.* **1961**, *65*, 229.
- <sup>11</sup> [https://www.horiba.com/en\\_en/applications/materials/material-research/quantum-dots/recording-fluorescence-quantum-yields/](https://www.horiba.com/en_en/applications/materials/material-research/quantum-dots/recording-fluorescence-quantum-yields/) (accessed February 2021)
- <sup>13</sup> Gaussian 16, Revision A.03, Frisch, M. J.; Trucks, G. W.; Schlegel, H. B.; Scuseria, G. E.; Robb, M. A.; Cheeseman, J. R.; Scalmani, G.; Barone, V.; Petersson, G. A.; Nakatsuji, H.; Li, X.; Caricato, M.; Marenich, A. V.; Bloino, J.; Janesko, B. G.; Gomperts, R.; Mennucci, B.; Hratchian, H. P.; Ortiz, J. V.; Izmaylov, A. F.; Sonnenberg, J. L.; Williams-Young, D.; Ding, F.; Lipparini, F.; Egidi, F.; Goings, J.; Peng, B.; Petrone, A.; Henderson, T.; Ranasinghe, D.; Zakrzewski, V. G.; Gao, J.; Rega, N.; Zheng, G.; Liang, W.; Hada, M.; Ehara, M.; Toyota, K.; Fukuda, R.; Hasegawa, J.; Ishida, M.; Nakajima, T.; Honda, Y.; Kitao, O.; Nakai, H.; Vreven, T.; Throssell, K.; Montgomery, J. A., Jr.; Peralta, J. E.; Ogliaro, F.; Bearpark, M. J.; Heyd, J. J.; Brothers, E. N.; Kudin, K. N.; Staroverov, V. N.; Keith, T. A.; Kobayashi, R.; Normand, J.; Raghavachari, K.; Rendell, A. P.; Burant, J. C.; Iyengar, S. S.; Tomasi, J.; Cossi, M.; Millam, J. M.; Klene, M.; Adamo, C.; Cammi, R.; Ochterski, J. W.; Martin, R. L.; Morokuma, K.; Farkas, O.; Foresman, J. B.; Fox, D. J. Gaussian, Inc., Wallingford CT, 2016.
- <sup>14</sup> Chai, J.-D.; Head-Gordon, M. *Phys. Chem. Chem. Phys.* **2008**, *10*, 6615.
- <sup>15</sup> O'Boyle, N. M.; Vandermeersch, T.; Flynn, C. J.; Maguire, A. R.; Hutchinson, G. R. *J. Cheminf.* **2011**, *3*, 8.
- <sup>16</sup> O'Boyle, N. M.; Banck, M.; James, C. A.; Morley, C.; Vandermeersch, T.; Hutchinson, G. R. *J. Cheminf.* **2011**, *3*, 33.
- <sup>17</sup> The Open Babel Package, version 3.0.0 <http://openbabel.org> (accessed October 2019).
- <sup>18</sup> Günther, H.; Runsink, J.; Schmickler, H.; Schmitt, P. *J. Org. Chem.* **1985**, *50*, 289.
- <sup>19</sup> Engdahl, C.; Ahlberg, P. *J. Am. Chem. Soc.* **1979**, *101*, 3940.
- <sup>20</sup> Clark, S. J.; Segall, M. D.; Pickard, C. J.; Hasnip, P. J.; Probert, M. J.; Refson, K.; Payne, M. C. Z. *Kristallogr.* **2005**, *220*, 567.
- <sup>21</sup> Perdew, J. P.; Burke, K.; Ernzerhof, M. *Phys. Rev. Lett.* **1996**, *77*, 3865.
- <sup>22</sup> Sturniolo, S.; Green, T. F. G.; Hanson, R. M.; Zilka, M.; Refson, K.; Hodgkinson, P.; Brown, S. P.; Yates, J. R. *Solid State Nucl. Magn. Reson.* **2016**, *78*, 64.
